# Supplementary material for: Identification of candidate long non-coding RNAs and mRNAs associated with heart aging in mice
Source: PeerJ. 2025 Dec 2;13:e20433. doi: 10.7717/peerj.20433 (PMC12679924; doi:10.7717/peerj.20433)
Supplement: Supplemental Information 2 [file peerj-13-20433-s002.xlsx]

## Sheet: Sheet1
Extended table S1. top 100 differentially expressed lncRNAs in mice hearts(20m vs. 3m)
Transcript_ID	P-value*	FDR	Fold Change	Regulation	Canonical	chrom	description	GeneID	GeneSymbol	lncRNA_level	Locus	RNAlength	Sequence	source	strand	Subcellular_Localization	ProbeName	txEnd	txStart	type	relationship	Associated_gene_acc	Associated_gene_name
ENSMUST00000233864	9.13e-11	2.239e-06	115.858	down	No	chr17	serine/threonine kinase 38 [Source:MGI Symbol;Acc:MGI:2442572]	ENSMUSG00000024006	Stk38	Reliable	chr17:28975849-28991383:-	694	TGAACCACAGCCTGCCCAGTGATTTCAAACATGAATTCCAAAAGGAAAGCAGAGACCTGG	GENCODE	-	Nucleus	ASMM10LNC1A106310484V4	28991383	28975849	lncRNA	exon sense-overlapping	ENSMUST00000119274	Stk38
ENSMUST00000187202	3.2364e-08	4.668e-05	67.5355	down	No	chr1	dipeptidylpeptidase 10 [Source:MGI Symbol;Acc:MGI:2442409]	ENSMUSG00000036815	Dpp10	Reliable	chr1:123608107-123650360:-	285	TCCCCAGATTTAAAGTATGTTCTCCTGGCATACGACGTTAAGCAGTTTTAGATGGTAATT	GENCODE	-		ASMM10LNC1A105983211V4	123650360	123608107	lncRNA	exon sense-overlapping	ENSMUST00000112603	Dpp10
ENSMUST00000222823	5.1461e-08	6.0087e-05	46.706	down	Yes	chr13	predicted gene, 40841 [Source:MGI Symbol;Acc:MGI:5623726]	ENSMUSG00000113216	Gm40841	Reliable	chr13:28394453-28420066:-	3989	TGCAGTGTGGATGTCCCTGCCCATTCAAATGAGGAAGAGCAAACAGTTTTGTACCAGTGT	GENCODE	-		ASMM10LNC1A105173684V4	28420066	28394453	lncRNA	intergenic
ENSMUST00000147045	4.656e-09	2.3291e-05	45.2407	down	Yes	chr6	predicted gene 15082 [Source:MGI Symbol;Acc:MGI:3705124]	ENSMUSG00000087053	Gm15082	Gold	chr6:113937739-113940206:+	1960	TCCTGTCTTTGTCTCTTATTCCCTGCCCTTTGGTCCTCTCAGGCAAATAAATCTTTGTGC	GENCODE	+		ASMM10LNC1A100004808V4	113940206	113937739	lncRNA	intronic antisense	ENSMUST00000101045	Atp2b2
ENSMUST00000195940	1.27591e-08	2.6071e-05	44.9571	down	No	chr3	RIKEN cDNA 4632404H12 gene [Source:MGI Symbol;Acc:MGI:1921284]	ENSMUSG00000042579	4632404H12Rik	Reliable	chr3:89768121-89772791:-	4671	CCTATATAAGCCCTGCCCTTTGTTCAATCTCTGCTGTCCATTTCCAGAAGCCACCCCTGG	GENCODE	-	Nucleus;Cytoplasm	ASMM10LNC1A101520924V4	89772791	89768121	lncRNA	intergenic
ENSMUST00000129027	8.549e-09	2.3291e-05	44.4673	down	No	chr10	transcription factor 3 [Source:MGI Symbol;Acc:MGI:98510]	ENSMUSG00000020167	Tcf3	Reliable	chr10:80412627-80415487:-	819	TGACTGTCCCTGCCCAGTTTGCTACACTGTGGCACTAATGACCAGTCCTGCCTCATACTG	GENCODE	-		ASMM10LNC1A100011613V4	80415487	80412627	lncRNA	exon sense-overlapping	ENSMUST00000105344	Tcf3
ENSMUST00000140361	2.0548e-07	0.000129189	32.3862	down	No	chr1	dipeptidylpeptidase 10 [Source:MGI Symbol;Acc:MGI:2442409]	ENSMUSG00000036815	Dpp10	Reliable	chr1:123625839-124045255:-	656	TCTCCTGGCATACGACGTTAAGCAGATTTTGAAGCATGAAGTCTGAAACGATGTCTCTCT	GENCODE	-		ASMM10LNC1A105478294V4	124045255	123625839	lncRNA	exon sense-overlapping	ENSMUST00000112603	Dpp10
ENSMUST00000151652	5.88157e-07	0.000211982	27.6998	down	Yes	chr11	breast carcinoma amplified sequence 3, opposite strand 1 [Source:MGI Symbol;Acc:MGI:1918739]	ENSMUSG00000086199	Bcas3os1	Gold	chr11:85702200-85719744:-	3138	TGTCTGATGTTCTGAATACGGCCATGACACCAAGGAACCCCGCCTGAAAACTTCAGCTCA	GENCODE	-		ASMM10LNC1A103136888V4	85719744	85702200	lncRNA	intronic antisense	ENSMUST00000108062	Bcas3
TCONS_00015184	4.166e-10	5.108e-06	24.8213	down	Yes	chr18		XLOC_011520	XLOC_011520		chr18:42615652-42619327:-	2411	GTTTTGTGGGATTCGGACAATGCTCCCTGCCCTTCTCCATACTCATTTTCTTCATCATCT	Alexander et al 2013	-		ASMM10P017807V4	42619327	42615652	lncRNA	intergenic
ENSMUST00000176476	5.20331e-06	0.000729058	24.5747	down	No	chr4	basonuclin 2 [Source:MGI Symbol;Acc:MGI:2443805]	ENSMUSG00000028487	Bnc2	Reliable	chr4:84293635-84533396:-	541	AAGCTACTCATAATTGAAATTCTCCAGGCAAATCAGATATCAACATTTCCAACAGAACGG	GENCODE	-	Exosome	ASMM10LNC1A100097592V4	84533396	84293635	lncRNA	exon sense-overlapping	ENSMUST00000175756	Bnc2
ENSMUST00000142943	3.89634e-08	5.2119e-05	23.8503	down	No	chr2	solute carrier family 39 (metal ion transporter), member 13 [Source:MGI Symbol;Acc:MGI:1915677]	ENSMUSG00000002105	Slc39a13	Reliable	chr2:91068431-91068871:-	360	CCATGGCCGGTTGAGAGCGCCCGGCATGCCTGGATGTCCCTGCCCTGGCTGTGGTATGGC	GENCODE	-		ASMM10LNC1A115526037V4	91068871	91068431	lncRNA	exon sense-overlapping	ENSMUST00000073575	Slc39a13
ENSMUST00000124403	1.23893e-05	0.0012055	22.7417	down	No	chr2	MACRO domain containing 2 [Source:MGI Symbol;Acc:MGI:1920149]	ENSMUSG00000068205	Macrod2	Gold	chr2:140395460-140420495:+	1049	AGCCAGCCACCCCCACGGCAGCATGTACCCCAGCAACAAGAAGAAAAAGAACGTTTGCTG	GENCODE	+		ASMM10LNC1A105092784V4	140420495	140395460	lncRNA	exon sense-overlapping	ENSMUST00000078027	Macrod2
AK140170	2.12853e-08	4.0147e-05	21.6631	down	Yes	chr3		AK140170	AK140170		chr3:17852629-17853401:+	772	AGAAAGAGACTCTATAGCAGTCCCTGCCCCTTCCTTCTACTAGCTAAGGAAAAAGTAAAA	Genbank	+		ASMM10P025656V4	17853401	17852629	lncRNA	intergenic
uc012hdk.1	9.26563e-08	7.0998e-05	19.4293	up	Yes	chrM	n/a	GU332589	GU332589	Reliable	chrM:1094-2681:-	1588	GCTCCTAGATGTACGAATTTCTTTCTCCAATACTTTTAGTAGGATAAATGTTTTGATTTA	knownGene	-		ASMM10LNC1A100064021V4	2681	1094	lncRNA	intergenic
AK016451	0.00153877	0.0134897	16.7652	down	Yes	chr7		AK016451	AK016451		chr7:92081088-92082536:-	1448	CACTGCCCAGTCTCCAGATTCTTTTAAAGATAAGCCAAGAATCTAGACTTTATGTAAAAT	Genbank	-		ASMM10P036503V4	92082536	92081088	lncRNA	intronic antisense	ENSMUST00000074273	Dlg2
ENSMUST00000214348	0.000116794	0.00331971	16.2314	up	Yes	chr9	predicted gene, 35548 [Source:MGI Symbol;Acc:MGI:5594707]	ENSMUSG00000111697	Gm35548	Reliable	chr9:82249931-82260208:-	441	AGCTCTATGAATCCAGTCCTCTCTTTTGGCTTTTACAGACTCCAGTGCACATGTGGCACA	GENCODE	-		ASMM10LNC1A100095641V4	82260208	82249931	lncRNA	intergenic
ENSMUST00000147654	0.00136913	0.0125125	14.2953	down	No	chr4	RIKEN cDNA 1700047F07 gene [Source:MGI Symbol;Acc:MGI:1920570]	ENSMUSG00000085549	1700047F07Rik	Reliable	chr4:107707057-107708644:+	386	TCCTTTAGTCGAGCTCTTCCCAACGTTGCTGATTAGAACCCAGTGCTCTCCGGGAAGCAC	GENCODE	+		ASMM10LNC1A104137955V4	107708644	107707057	lncRNA	intergenic
ENSMUST00000197091	2.77639e-07	0.000147994	13.685	down	No	chr5	RIKEN cDNA 4930584F24 gene [Source:MGI Symbol;Acc:MGI:1923192]	ENSMUSG00000029044	4930584F24Rik	Gold	chr5:26460072-26493314:-	954	TATCCTCCAAGTAACATCCTAAGTTCTGAGCTATAGTTACCCAGCTCTTCCCAGTCCTGA	GENCODE	-		ASMM10LNC1A110882397V4	26493314	26460072	lncRNA	intergenic
uc029sug.1	7.05431e-05	0.0025629	13.4294	down	Yes	chr15	n/a	AK155692	AK155692	Reliable	chr15:86194749-86195280:+	532	GAGGTCTTGGGGCCGAAACGATCTCAACCTATTCTCAAACTTTAAATGGGTAAGAAGCCC	knownGene	+		ASMM10LNC1A100064121V4	86195280	86194749	lncRNA	intergenic
AK013270	8.02902e-08	6.6582e-05	13.1573	down	Yes	chr4		AK013270	AK013270		chr4:99655717-99656013:-	300	GAGTGTCCTCCGGACTGTAGGGCTTCTTACCACCCTGCCCTCTCCGCCCCCTGCATTTTT	Genbank	-		ASMM10P027470V4	99656013	99655717	lncRNA	intergenic
ENSMUST00000125317	4.07655e-06	0.000644885	13.0916	down	Yes	chr17	RIKEN cDNA 1700030A11 gene [Source:MGI Symbol;Acc:MGI:1921429]	ENSMUSG00000085333	1700030A11Rik	Gold	chr17:28905265-28906771:+	888	TACCCTGCCTTTAAAAATGCCGCCCTCGTTTTTAGACAATTAAATGAAGAGGGTATTGTG	GENCODE	+		ASMM10LNC1A100110978V4	28906771	28905265	lncRNA	natural antisense	ENSMUST00000062357	4930539E08Rik
ENSMUST00000129432	2.27437e-06	0.000457112	12.8522	down	No	chr11	predicted gene 12162 [Source:MGI Symbol;Acc:MGI:3649481]	ENSMUSG00000085476	Gm12162	Reliable	chr11:45409042-45420784:-	127	ACACCTGCCAGCCACCCAGACTCGGGCAAATGACATTACACTGTACCATCGCAAAGGGAT	GENCODE	-		ASMM10LNC1A100628043V4	45420784	45409042	lncRNA	intergenic
ENSMUST00000144941	1.71455e-06	0.000385987	12.7901	down	No	chr4	dpy-19-like 4 (C. elegans) [Source:MGI Symbol;Acc:MGI:2685869]	ENSMUSG00000045205	Dpy19l4	Reliable	chr4:11303423-11322047:-	562	TGATAGAGATGAGGAACATCTGTAGAACCCCGCCAAAGGAAAAAGCAAAGAACTTCAGGA	GENCODE	-	Nucleus	ASMM10LNC1A115762328V4	11322047	11303423	lncRNA	exon sense-overlapping	ENSMUST00000128024	Dpy19l4
ENSMUST00000154871	3.68355e-07	0.000179158	12.2679	down	No	chr11	formin-like 1 [Source:MGI Symbol;Acc:MGI:1888994]	ENSMUSG00000055805	Fmnl1	Gold	chr11:103185228-103190658:+	829	CCAGTCCTCTGCCCTTACTTCCCAAATACTGGAATTACAGGCTGACCCCTGCCCACAGCA	GENCODE	+		ASMM10LNC1A109068715V4	103190658	103185228	lncRNA	exon sense-overlapping	ENSMUST00000107027	Fmnl1
mouselincRNA0344-	2.35417e-07	0.000134243	11.5442	down	Yes	chr12		mouselincRNA0344	mouselincRNA0344		chr12:100529800-100535875:-	6075	ACTGATTTCTCAAATCCTGTTTCCAAGAAAATCCTGTCCCTGCCCCTGGGACTGCAATAT	lincRNA	-		mouselincRNA0344-_P1V4	100535875	100529800	lncRNA	intergenic
ENSMUST00000218247	6.05168e-07	0.000211982	11.298	down	No	chr10	predicted gene, 40709 [Source:MGI Symbol;Acc:MGI:5623594]	ENSMUSG00000112641	Gm40709	Reliable	chr10:78352571-78353702:+	754	TAATAAATCCCCAGCTCTCTTCAACTACATAAGCTGCTGTGACCACCAGCAAACAGGTTC	GENCODE	+		ASMM10LNC1A100047826V4	78353702	78352571	lncRNA	intergenic
ENSMUST00000211880	1.58292e-06	0.000376828	10.5632	down	No	chr8	microtubule-associated protein 1S [Source:MGI Symbol;Acc:MGI:2443304]	ENSMUSG00000019261	Map1s	Reliable	chr8:70905990-70911479:+	353	TCTCCAGCATTGTGAAAGCTCGTCCCTGCCCAGTGGGTTGAGTCACCACCTACAGCTGCA	GENCODE	+	Cytoplasm	ASMM10LNC1A105736351V4	70911479	70905990	lncRNA	exon sense-overlapping	ENSMUST00000213001	Map1s
ENSMUST00000200218	1.73207e-05	0.00139247	10.4558	down	No	chr7	chromodomain helicase DNA binding protein 2 [Source:MGI Symbol;Acc:MGI:2448567]	ENSMUSG00000078671	Chd2	Gold	chr7:73539798-73541525:-	1387	ACTACTAGATAGGACTCTTGCTTTGGACCTACTACATGGATCAGTAAATACCTGGGCACA	GENCODE	-	Nucleus	ASMM10LNC1A109623237V4	73541525	73539798	lncRNA	exon sense-overlapping	ENSMUST00000169922	Chd2
uc.239+	0.000678773	0.00836542	10.219	down	Yes	chr4		uc.239	uc.239		chr4:6913609-6913909:+	300	CCTTAATGAACCCCGCTGATTCCATTTAGTAAAGCATGCCTCAAAGTTATAATCAAGAGG	UCR	+		ASMM10UP148V4	6913909	6913609	lncRNA	intronic antisense	ENSMUST00000039987	Tox
ENSMUST00000148524	0.0001624	0.00385726	10.0686	down	No	chr4	dpy-19-like 4 (C. elegans) [Source:MGI Symbol;Acc:MGI:2685869]	ENSMUSG00000045205	Dpy19l4	Reliable	chr4:11317096-11322100:-	471	AGTTGCTCCGCAGTGGAAAGCAGGACGAGCTTGGGAACATCTGTAGAACCCCGCCAAAGG	GENCODE	-	Nucleus	ASMM10LNC1A109043224V4	11322100	11317096	lncRNA	exon sense-overlapping	ENSMUST00000128024	Dpy19l4
ENSMUST00000128607	3.349e-07	0.000171078	9.89571	down	No	chr4	mitochondrial trans-2-enoyl-CoA reductase [Source:MGI Symbol;Acc:MGI:1349441]	ENSMUSG00000028910	Mecr	Reliable	chr4:131864778-131867776:+	743	TGACATATGGTCCCTGCCTCTAATTCTTTAAGTCAGAGGTTAAAACTGGGAAGCTATATA	GENCODE	+	Cytoplasm	ASMM10LNC1A100092371V4	131867776	131864778	lncRNA	exon sense-overlapping	ENSMUST00000030742	Mecr
ENSMUST00000181159	5.03388e-07	0.000211982	9.65919	down	No	chr8	predicted gene 2694 [Source:MGI Symbol;Acc:MGI:3780864]	ENSMUSG00000097248	Gm2694	Gold	chr8:87472812-87525554:+	682	CCCAGCTGAACACAGGACCAGAGGGGATACTGCCTGCTCAGGAAAGCCAAGAGGAGCCTG	GENCODE	+		ASMM10LNC1A104652878V4	87525554	87472812	lncRNA	intergenic
ENSMUST00000160528	0.00062929	0.00801985	9.35379	down	No	chr17	complement component 4A (Rodgers blood group) [Source:MGI Symbol;Acc:MGI:98320]	ENSMUSG00000015451	C4a	Reliable	chr17:34811114-34823464:-	4477	GCAGCTATTTGAGGGTCGTCGGAGCCGCCGCAGGAGGGAGGCCCCCAAGCTGACCTCTCT	GENCODE	-		ASMM10LNC1A117684793V4	34823464	34811114	lncRNA	exon sense-overlapping	uc008cdn.1	C4b
AK156111	0.000224067	0.00461865	9.33497	up	Yes	chr14		AK156111	AK156111		chr14:17871371-17874871:-	3504	CTCCCTCACTTTTGCTATGAAGGTTGCACCATAACATATGCTCCAGTGGGATTTAAAACT	Genbank	-		ASMM10P010706V4	17874871	17871371	lncRNA	intronic antisense	ENSMUST00000224597	Thrb
ENSMUST00000207924	8.1545e-09	2.3291e-05	9.10948	up	No	chr16	RIKEN cDNA 1700041M19 gene [Source:MGI Symbol;Acc:MGI:1923851]	ENSMUSG00000100857	1700041M19Rik	Reliable	chr16:76985998-77010879:-	196	GAAACATCCTAAGATCCCGTCTAAAATCAATGTATTGTGAGAAGTAAAATATGTTTATCG	GENCODE	-		ASMM10LNC1A100021113V4	77010879	76985998	lncRNA	intergenic
ENSMUST00000163012	7.96009e-05	0.00272459	9.10714	down	No	chr6	LUC7-like 2 (S. cerevisiae) [Source:MGI Symbol;Acc:MGI:2183260]	ENSMUSG00000029823	Luc7l2	Reliable	chr6:38551531-38554007:+	2291	AATGTTGCTTTTGGGGGATAATTAACAATGTACTTTCAAATTAAAGTTCAGCACTTTCTT	GENCODE	+		ASMM10LNC1A100081877V4	38554007	38551531	lncRNA	exon sense-overlapping	ENSMUST00000161227	Luc7l2
ENSMUST00000181957	0.000143342	0.00364915	9.06374	up	No	chr9	predicted gene, 26870 [Source:MGI Symbol;Acc:MGI:5477364]	ENSMUSG00000097312	Gm26870	Gold	chr9:3024048-3038313:-	1170	GAATATGGCGAGGAAACTGAAAATCACGGAAAATGAGAAGTACACACTTTGGGACATGAA	GENCODE	-		ASMM10LNC1A105655629V4	3038313	3024048	lncRNA	natural antisense	ENSMUST00000099046	Gm10718
AK020372	2.95925e-05	0.00173747	8.81739	down	Yes	chr6		AK020372	AK020372		chr6:38610048-38610964:+	917	CAACTTGGGCTACAATAGAAAAACCCTGCCCTTTGGAGGAAAAAAGTAAGAAAAAATAGA	Genbank	+		ASMM10P034314V4	38610964	38610048	lncRNA	intergenic
ENSMUST00000150690	2.30279e-07	0.000134243	8.55783	up	Yes	chrX	predicted gene 15239 [Source:MGI Symbol;Acc:MGI:3705189]	ENSMUSG00000086258	Gm15239	Gold	chrX:167361455-167364421:+	603	TATACACCAGTATCCCTGTGGGTAACTGTTACAGAATTAAATCTAACAATTGCGATGCCA	GENCODE	+		ASMM10LNC1A100073839V4	167364421	167361455	lncRNA	natural antisense	ENSMUST00000026839	Prps2
ENSMUST00000220742	0.000372721	0.00607654	8.35582	up	No	chr12	ring finger protein 144A [Source:MGI Symbol;Acc:MGI:1344401]	ENSMUSG00000020642	Rnf144a	Reliable	chr12:26307429-26310386:-	558	TCTCCCCCTGTCAACTGAGTAGTGAAAAATCAATAAGGTGAAATTATCTTTTCCATTGGA	GENCODE	-	Cytoplasm	ASMM10LNC1A106740413V4	26310386	26307429	lncRNA	exon sense-overlapping	ENSMUST00000020971	Rnf144a
ENSMUST00000196582	0.00154219	0.0135003	8.12449	up	Yes	chr3	predicted gene 43356 [Source:MGI Symbol;Acc:MGI:5663493]	ENSMUSG00000104617	Gm43356	Gold	chr3:136952790-136955093:-	609	GGGTTGGCTACACCTTATCCTCAATGCAATCCTACAAGATTAATCAAACAGAAGAATTTG	GENCODE	-		ASMM10LNC1A100079596V4	136955093	136952790	lncRNA	intergenic
ENSMUST00000209306	2.6578e-07	0.000144821	8.05585	down	No	chr9	trafficking protein, kinesin binding 1 [Source:MGI Symbol;Acc:MGI:1914345]	ENSMUSG00000032536	Trak1	Reliable	chr9:121391961-121400795:+	651	CGCTGAAATACTTCCGGGTGTATGTGTGCTACTACCTGCAGGAACCAGCTCTCTCCCTCC	GENCODE	+		ASMM10LNC1A107949918V4	121400795	121391961	lncRNA	exon sense-overlapping	ENSMUST00000045903	Trak1
ENSMUST00000189898	0.000179738	0.00411502	7.95543	up	Yes	chr12	predicted gene 29587 [Source:MGI Symbol;Acc:MGI:5580293]	ENSMUSG00000100192	Gm29587	Reliable	chr12:74222498-74235140:-	332	TCTCCCGTGAAGCTCAGTGATCCAACACAGAGACAGACAAAACAGGAAAAAGAGAAGAGA	GENCODE	-		ASMM10LNC1A100111369V4	74235140	74222498	lncRNA	natural antisense	NM_001364281	Syt16
ENSMUST00000151507	2.26567e-05	0.00156051	7.80911	down	No	chr11	myosin XVB [Source:MGI Symbol;Acc:MGI:2685534]	ENSMUSG00000034427	Myo15b	Reliable	chr11:115877516-115880155:+	651	CCCCTGGCCCGCACAGCGGGGAGCCCTGGGGGAAAGTGTCAAATATGGCCACCAGGCCTT	GENCODE	+		ASMM10LNC1A116140174V4	115880155	115877516	lncRNA	exon sense-overlapping	ENSMUST00000222123	Myo15b
AK053631	1.71585e-06	0.000385987	7.75801	up	Yes	chr16		AK053631	AK053631		chr16:72412744-72415443:+	2699	GTAGGGTTTAGGGCTTAGGTGACATTATCCAACTGATCAGGTCAGGTAGTAATGATGAAT	Genbank	+		ASMM10P015308V4	72415443	72412744	lncRNA	intron sense-overlapping	ENSMUST00000231580	Robo1
ENSMUST00000076585	8.64808e-05	0.00279751	7.73003	up	No	chr8	NIN1/RPN12 binding protein 1 homolog [Source:MGI Symbol;Acc:MGI:1914869]	ENSMUSG00000003848	Nob1	Reliable	chr8:107418056-107422327:-	783	CTCCCCCAGATGGAATATTGATTCTAAGTCCTTCGAGAAGAAAACATTTGTGCATGGCAC	GENCODE	-		ASMM10LNC1A100122483V4	107422327	107418056	lncRNA	exon sense-overlapping	ENSMUST00000003946	Nob1
ENSMUST00000152055	9.65933e-05	0.0029792	7.67305	up	No	chr2	E74-like factor 5 [Source:MGI Symbol;Acc:MGI:1335079]	ENSMUSG00000027186	Elf5	Reliable	chr2:103448738-103449823:+	623	TGGGGGCTCACTTTATTCTGCTCCTTCCCCCAAAGGCCTCCAAAGTTCTCACCTGTGGGA	GENCODE	+	Nucleus	ASMM10LNC1A117998730V4	103449823	103448738	lncRNA	exon sense-overlapping	ENSMUST00000164172	Elf5
ENSMUST00000169028	1.60497e-05	0.00136791	7.64876	down	No	chr13	Iroquois homeobox 2 [Source:MGI Symbol;Acc:MGI:1197526]	ENSMUSG00000001504	Irx2	Reliable	chr13:72628971-72630725:+	515	CCGCGGCTGCCGGCTTCCCGTCCTACGTGGCTGTTGTGGGTTCCAGGGCTCGCCATACGA	GENCODE	+	Cytoplasm	ASMM10LNC1A114615561V4	72630725	72628971	lncRNA	exon sense-overlapping	ENSMUST00000074372	Irx2
ENSMUST00000142217	2.98088e-08	4.668e-05	7.59029	down	No	chr11	proteasome (prosome, macropain) activator subunit 4 [Source:MGI Symbol;Acc:MGI:2143994]	ENSMUSG00000040850	Psme4	Reliable	chr11:30830102-30834148:+	579	CAGAAGTATAAGAAATTGAAGTACTAGAGACTAGAAATTTGTTACAGGGTATTATCTTTG	GENCODE	+	Nucleus	ASMM10LNC1A100061917V4	30834148	30830102	lncRNA	exon sense-overlapping	ENSMUST00000041231	Psme4
ENSMUST00000125272	1.53644e-06	0.000373004	7.40182	down	No	chr5	FMS-like tyrosine kinase 1 [Source:MGI Symbol;Acc:MGI:95558]	ENSMUSG00000029648	Flt1	Reliable	chr5:147604660-147634418:-	395	GCGCTGTGACACATACCCCGCCCGCTCCCTGCCCCCAATAAATAAATACTTTTTAAAATG	GENCODE	-	Cytoplasm	ASMM10LNC1A100044670V4	147634418	147604660	lncRNA	exon sense-overlapping	ENSMUST00000031653	Flt1
ENSMUST00000215823	3.46855e-06	0.000591546	7.39342	down	No	chr14	RIKEN cDNA A630023A22 gene [Source:MGI Symbol;Acc:MGI:2145657]	ENSMUSG00000095493	A630023A22Rik	Reliable	chr14:34051262-34102754:-	479	GCACCCGTGGTCACAGAGAAACAAGCTCCTACATACACCAGCCACACCAGATGCTGACCT	GENCODE	-		ASMM10LNC1A101139141V4	34102754	34051262	lncRNA	bidirectional	ENSMUST00000120077	Anxa8
ENSMUST00000153934	0.00168433	0.0142364	7.34244	down	No	chr9	multiple EGF-like-domains 11 [Source:MGI Symbol;Acc:MGI:1920951]	ENSMUSG00000036466	Megf11	Gold	chr9:64693781-64705933:+	865	CAGCAGCTTCCAGATTTGTCTCAAAGTAGCAGCCATGCCCAGTGCTTTTCCAATGCCAGC	GENCODE	+		ASMM10LNC1A107482341V4	64705933	64693781	lncRNA	exon sense-overlapping	ENSMUST00000118485	Megf11
AK016740	0.00016101	0.0038367	7.22255	up	Yes	chr3		AK016740	AK016740		chr3:57227724-57229178:-	1454	CAGATGTCCAGCTTCTGCTAGGAACTTTAGTTCACAGATCCGTTTTTCATCCACAAAACT	Genbank	-		ASMM10P024708V4	57229178	57227724	lncRNA	intergenic
ENSMUST00000144103	7.58386e-06	0.000903433	7.17926	down	No	chr7	B cell CLL/lymphoma 7C [Source:MGI Symbol;Acc:MGI:1332237]	ENSMUSG00000030814	Bcl7c	Reliable	chr7:127705794-127708075:-	486	AAGCTGTCCCTACCCTAGCACACCTCCCTGACCTCCAGTCTGTGGGGCTCATCCTTGGGC	GENCODE	-		ASMM10LNC1A100132088V4	127708075	127705794	lncRNA	exon sense-overlapping	ENSMUST00000205977	Bcl7c
ENSMUST00000057837	8.69643e-06	0.000991798	7.15774	up	No	chr4	RIKEN cDNA 4930553M12 gene [Source:MGI Symbol;Acc:MGI:1922496]	ENSMUSG00000054351	4930553M12Rik	Reliable	chr4:88867882-88868379:-	498	GAGGACTCACTAGAGAGAATATACAGGAAAGATACCAAAATAACATTCAGGGGACATTAA	GENCODE	-		ASMM10LNC1A100083772V4	88868379	88867882	lncRNA	intergenic
ENSMUST00000211530	1.32934e-05	0.00126691	7.14977	down	No	chr7	RIKEN cDNA 0610005C13 gene [Source:MGI Symbol;Acc:MGI:1918911]	ENSMUSG00000109644	0610005C13Rik	Reliable	chr7:45570988-45575138:-	402	CAGCGAGCAGTCAGCGGCTGAAGGGCAGTCTCGTGCCAGCCATTGAAAATGCTCAAGGCA	GENCODE	-		ASMM10LNC1A112436086V4	45575138	45570988	lncRNA	natural antisense	ENSMUST00000209204	Bcat2
ENSMUST00000224744	8.41778e-08	6.6582e-05	6.99889	up	Yes	chr13	predicted gene, 49223 [Source:MGI Symbol;Acc:MGI:6118679]	ENSMUSG00000114602	Gm49223	Reliable	chr13:84274844-84280817:+	395	GCAAAGAGAGTGGTATTCAGTTAACAGAACAACTACTATCTTCGTATAAGCAGCATCAGA	GENCODE	+		ASMM10LNC1A100047930V4	84280817	84274844	lncRNA	intron sense-overlapping	ENSMUST00000057495	Tmem161b
TCONS_00013456	8.33692e-05	0.00276245	6.98613	down	Yes	chr17		XLOC_010436	XLOC_010436		chr17:9403342-9420649:-	2296	CTTCCCTTGCTTGTGTACTTAAGTCAACTGCCCTATGTGTATTTTTATACTTGACTTCCA	Alexander et al 2013	-		ASMM10P015533V4	9420649	9403342	lncRNA	intergenic
ENSMUST00000199953	4.68583e-05	0.00215122	6.92827	down	Yes	chr3	predicted gene 42869 [Source:MGI Symbol;Acc:MGI:5663006]	ENSMUSG00000105137	Gm42869	Reliable	chr3:100624902-100627022:-	2121	GATGGTGATTGTATTAAATAAGGTCATTTTTGGTAAAACAGCTATTTTTGCACTGTCAAT	GENCODE	-		ASMM10LNC1A100111489V4	100627022	100624902	lncRNA	intron sense-overlapping	ENSMUST00000008907	Man1a2
ENSMUST00000146368	0.0135979	0.0520077	6.89224	down	No	chr9	interactor of little elongation complex ELL subunit 2 [Source:MGI Symbol;Acc:MGI:2135947]	ENSMUSG00000032235	Ice2	Reliable	chr9:69416715-69425705:+	453	GCTTATCACCCTGATGCATGTTTTGCCCAGTGCTCATGGAGGTATTTGTGAAAAGAACCT	GENCODE	+		ASMM10LNC1A100023802V4	69425705	69416715	lncRNA	exon sense-overlapping	ENSMUST00000034761	Ice2
ENSMUST00000122836	1.39924e-05	0.00128983	6.84584	down	No	chr15	EF-hand calcium binding domain 6 [Source:MGI Symbol;Acc:MGI:1924877]	ENSMUSG00000022441	Efcab6	Reliable	chr15:84018668-84065379:-	381	GGTGACCACCAAGCCGGCCACCGCGATCGCCAACCCAGTTCTGTCCTACTTAGACATTGA	GENCODE	-		ASMM10LNC1A105261129V4	84065379	84018668	lncRNA	exon sense-overlapping	ENSMUST00000156187	Efcab6
ENSMUST00000219021	4.81561e-06	0.00069869	6.84523	down	No	chr10	RIKEN cDNA 1110002J07 gene [Source:MGI Symbol;Acc:MGI:1915738]	ENSMUSG00000097134	1110002J07Rik	Gold	chr10:66915636-66917739:-	388	AGCGGGATGCAGTTGTAAGTAACCCAGCACTCTCCTACAGTGAGAGGGGTTGTCCAGGCA	GENCODE	-		ASMM10LNC1A106156950V4	66917739	66915636	lncRNA	intergenic
ENSMUST00000233039	0.00080277	0.00922828	6.71223	up	No	chr17	predicted gene 11110 [Source:MGI Symbol;Acc:MGI:3779362]	ENSMUSG00000079414	Gm11110	Reliable	chr17:57092035-57105942:-	1014	TCTCCCTGTCGGTGCAGCGATGCTTCCAGAAGCTATAACTTCTTCAAAGCCACAGTTTGA	GENCODE	-		ASMM10LNC1A112681686V4	57105942	57092035	lncRNA	natural antisense	ENSMUST00000039490	Tnfsf9
ENSMUST00000195771	0.0014009	0.0126832	6.65608	up	Yes	chr1	predicted gene, 37323 [Source:MGI Symbol;Acc:MGI:5610551]	ENSMUSG00000104328	Gm37323	Gold	chr1:4583129-4586252:-	2773	TCTCCCATTGATCCACATCTGCAGCCCAATTTACCTTTTTATTTAATGATGACATTAAAT	GENCODE	-		ASMM10LNC1A100095469V4	4586252	4583129	lncRNA	intergenic
AK030243	0.000505145	0.00713489	6.63878	down	Yes	chr1		AK030243	AK030243		chr1:96313241-96315535:+	2295	ACTCTAACCCTAACTATCTAGTAGCTGGTTCCTTTCCCAAGTTACCCTCAGGATAGTTGG	Genbank	+		ASMM10P019940V4	96315535	96313241	lncRNA	intergenic
ENSMUST00000206138	2.57434e-06	0.000489324	6.62006	down	No	chr7	methylmalonyl CoA epimerase [Source:MGI Symbol;Acc:MGI:1920974]	ENSMUSG00000033429	Mcee	Reliable	chr7:64392607-64398782:+	327	TAGCTCCCTGAAGGGTATTGGGCACCCCGGACTCGCGCCCCGTCCCTGCCCCGTTTCCAC	GENCODE	+	Cytoplasm	ASMM10LNC1A113405850V4	64398782	64392607	lncRNA	exon sense-overlapping	ENSMUST00000037205	Mcee
TCONS_00008073	7.90185e-05	0.00271744	6.53501	down	No	chr13		XLOC_006216	XLOC_006216		chr13:66161347-66168976:+	497	AAAGTTCTCCAGGACATACAAGGAAGTGCATCACTGTTAGGGTTGGCTTTGAAGTTCCAC	Alexander et al 2013	+		ASMM10P055974V4	66168976	66161347	lncRNA	intergenic
ENSMUST00000126901	1.25026e-06	0.000336884	6.52749	down	No	chr7	glucose phosphate isomerase 1 [Source:MGI Symbol;Acc:MGI:95797]	ENSMUSG00000036427	Gpi1	Reliable	chr7:34227121-34229794:-	532	ACGTCCCTGATACCTCTCCCTGGGTGTTTCCTTCTTGAACCTCAACACCAACCATGGGCA	GENCODE	-	Exosome	ASMM10LNC1A100960794V4	34229794	34227121	lncRNA	exon sense-overlapping	ENSMUST00000205800	Gpi1
ENSMUST00000123655	0.000286881	0.00522461	6.47695	up	No	chr12	proline rich membrane anchor 1 [Source:MGI Symbol;Acc:MGI:1926097]	ENSMUSG00000041669	Prima1	Gold	chr12:103196908-103202884:-	851	CTCCCTCACCAGTACCACAGAGATCCACCTCTCACTCAGAGACACTCGGATGCTGGTCTC	GENCODE	-		ASMM10LNC1A100051328V4	103202884	103196908	lncRNA	exon sense-overlapping	ENSMUST00000074416	Prima1
AK141275	0.000326124	0.00565129	6.43952	up	Yes	chr9		AK141275	AK141275		chr9:101117682-101120730:+	3047	CTCCCTCATCTTGTGACATGTTTTTAATTAGTTAAAAAATTTACCAGGGCCACACAGAAA	Genbank	+		ASMM10P043252V4	101120730	101117682	lncRNA	intronic antisense	ENSMUST00000066773	Ppp2r3a
AK156812	4.23905e-06	0.000657857	6.43867	down	Yes	chr11		AK156812	AK156812		chr11:46912118-46913000:+	882	TTGCAGCCACCAATTTGACATTTTAATTATGGAGATAAGAACCCAAGCAAGTGAATCATA	Genbank	+		ASMM10P048413V4	46913000	46912118	lncRNA	intronic antisense	ENSMUST00000109220	Sgcd
ENSMUST00000154574	5.97885e-07	0.000211982	6.37173	down	No	chr2	glucosidase, alpha; neutral C [Source:MGI Symbol;Acc:MGI:1923301]	ENSMUSG00000062646	Ganc	Gold	chr2:120403896-120423659:+	3099	GCCACCGCCATCTTCACAGCCATGAAGCGCCTACCCAAAGTATTGAGCCTTCTTCCGGCT	GENCODE	+	Nucleus	ASMM10LNC1A100015058V4	120423659	120403896	lncRNA	bidirectional	ENSMUST00000110729	Tmem87a
ENSMUST00000150816	0.00255184	0.0181999	6.31764	down	No	chr2	double zinc ribbon and ankyrin repeat domains 1 [Source:MGI Symbol;Acc:MGI:2139080]	ENSMUSG00000037259	Dzank1	Reliable	chr2:144522463-144526648:-	288	GCTTGGTCTACAGGAGAAAACATGACTGCTGGCTCAGTGTGTGCCCCTCAGATCATACCA	GENCODE	-		ASMM10LNC1A104476472V4	144526648	144522463	lncRNA	exon sense-overlapping	ENSMUST00000081982	Dzank1
ENSMUST00000133662	0.000315076	0.00555037	6.28921	down	No	chr4	protein tyrosine phosphatase 4a2 [Source:MGI Symbol;Acc:MGI:1277117]	ENSMUSG00000028788	Ptp4a2	Reliable	chr4:129820721-129839366:+	417	GCGGGGAGCGCGGCTCGAGGTTTTTCGTTGGAATATACGTTGCACATTTATGGCGATTCT	GENCODE	+	Exosome	ASMM10LNC1A111374291V4	129839366	129820721	lncRNA	exon sense-overlapping	ENSMUST00000030578	Ptp4a2
AK139352	0.00948047	0.0417345	6.23079	up	Yes	chr7		AK139352	AK139352		chr7:91048998-91053335:+	4337	TGCCTTCCAGGAAAGTTCCAGCAGAAGAACTACTTTTTCTATGGCATAAAGATTAAAGGT	Genbank	+		ASMM10P038321V4	91053335	91048998	lncRNA	intron sense-overlapping	ENSMUST00000231777	Dlg2
uc.193-	2.35595e-05	0.00157007	6.21822	down	No	chr9		uc.193	uc.193		chr9:88453334-88453656:-	322	GTATTTTGTGGCTGAAAAAGCAGCCTTGCTTCTTCAGATATTGTAGTTATTTGGATGTAT	UCR	-		ASMM10UP607V4	88453656	88453334	lncRNA	exon sense-overlapping	ENSMUST00000174282	Syncrip
CF620887	6.1817e-09	2.3291e-05	6.18763	up	Yes	chr12		humanlincRNA0728	humanlincRNA0728		chr12:81813980-81814572:-	613	GTGATGGGAGAGCATCTCTGATACAGTCTTCACAACTGTAGAATTACATCCTAAGCAGGA	lincRNA	-		ASMM10P057945V4	81814572	81813980	lncRNA	intergenic
ENSMUST00000223617	0.00435133	0.0252592	6.15992	down	No	chr13	expressed sequence AI197445 [Source:MGI Symbol;Acc:MGI:2145191]	ENSMUSG00000114780	AI197445	Reliable	chr13:107469822-107482718:+	242	CCCTTCTCCTACTTCCCTGGTAAGAAGCGAGCCCGCCCACGCACGTGTAACCAGTTGCAG	GENCODE	+		ASMM10LNC1A110681645V4	107482718	107469822	lncRNA	intergenic
ENSMUST00000213980	0.000177784	0.00409121	6.14018	down	No	chr9	septin 7 [Source:MGI Symbol;Acc:MGI:1335094]	ENSMUSG00000001833	Sept7	Reliable	chr9:25252649-25290802:+	1727	GCTGTTTTATCCTTTTAATATTGATTGCCACTTTAAACAAAGATCACTCAATGAGTTTCA	GENCODE	+	Pseudopodium	ASMM10LNC1A100048059V4	25290802	25252649	lncRNA	exon sense-overlapping	NM_001359738	Sept7
ENSMUST00000166866	2.35433e-06	0.00046555	6.12233	down	No	chr3	insulin receptor-related receptor [Source:MGI Symbol;Acc:MGI:1346037]	ENSMUSG00000005640	Insrr	Reliable	chr3:87801943-87802808:+	376	AGCAATCCTGGTGGACAAGTGTGTCCCTGCCCCCGAGGGATGGCCTGCACAGCAGGCGGT	GENCODE	+		ASMM10LNC1A118223361V4	87802808	87801943	lncRNA	bidirectional	ENSMUST00000107582	Insrr
AK020551	3.85705e-05	0.00200796	5.98079	down	Yes	chr13		AK020551	AK020551		chr13:12736530-12737484:+	955	CCAGGTATGTATTAGGAAATCACTTCTTACATGTTTGCTGAATTTTGGGTGCTGAATAAA	Genbank	+		ASMM10P052370V4	12737484	12736530	lncRNA	intergenic
AK018848	0.00046494	0.00680987	5.9626	up	Yes	chr9		AK018848	AK018848		chr9:59660383-59661160:-	219	CTCCCACCCAGAACTTAGCATCAACACTGACTTTTTATCTTTATAGTTTCCAAAACTTAA	Genbank	-		ASMM10P041689V4	59661160	59660383	lncRNA	intronic antisense	ENSMUST00000163694	Pkm
ENSMUST00000124766	1.21492e-08	2.6071e-05	5.91502	up	No	chr3	DC-STAMP domain containing 1 [Source:MGI Symbol;Acc:MGI:1925022]	ENSMUSG00000042672	Dcst1	Reliable	chr3:89352721-89355516:-	530	TGCGCTATGTGTCACAAGCTGGAGATAAAAGTCGAGGGAGATTCCATACTCGCCAAGCTT	GENCODE	-		ASMM10LNC1A101495195V4	89355516	89352721	lncRNA	exon sense-overlapping	ENSMUST00000070820	Dcst1
uc008lha.1	2.26157e-07	0.000134243	5.90575	up	No	chr2	n/a	ENSMUSG00000084906	Gm13794	Reliable	chr2:95394242-95569603:+	2446	CTTCCTGAAGCCAACCTAAAATCTGCAGAGGGGGAGAATCCTGCATACCCATGGTCCTCA	knownGene	+		ASMM10LNC1A110139064V4	95569603	95394242	lncRNA	intergenic
humanlincRNA2183+	1.33122e-06	0.000350985	5.84857	down	No	chr16		humanlincRNA2183	humanlincRNA2183		chr16:15367846-15391172:+	23326	TTTGTTCAGAGTCCTGTTGTTCTTCTGCATAAGAGCCTAGCTTCACCCCCATTACATGGA	lincRNA	+		humanlincRNA2183+_P1V4	15391172	15367846	lncRNA	intergenic
ENSMUST00000151032	0.00017344	0.00403869	5.83368	down	Yes	chr11	RIKEN cDNA 1700042O10 gene [Source:MGI Symbol;Acc:MGI:1920571]	ENSMUSG00000086391	1700042O10Rik	Gold	chr11:11868123-11885321:+	1075	TCCACTGTTGTCCTTTGGTAACCGAGAATAAGTGAATAAATAAATGAATGAATCCGTTCA	GENCODE	+		ASMM10LNC1A100004756V4	11885321	11868123	lncRNA	natural antisense	ENSMUST00000155690	Ddc
ENSMUST00000160659	0.000409089	0.00635667	5.78848	up	Yes	chr1	RIKEN cDNA 4930556I23 gene [Source:MGI Symbol;Acc:MGI:1922520]	ENSMUSG00000089767	4930556I23Rik	Gold	chr1:37614259-37615372:+	560	CTCCCATCCCTATCCCAGAGGCAGCTACTCTCTTCGAAACAGACGGAACATTTTCTCAGG	GENCODE	+		ASMM10LNC1A100126965V4	37615372	37614259	lncRNA	natural antisense	ENSMUST00000160023	2010300C02Rik
ENSMUST00000199394	6.02826e-07	0.000211982	5.72436	down	No	chr5	splicing factor SWAP [Source:MGI Symbol;Acc:MGI:101760]	ENSMUSG00000029439	Sfswap	Reliable	chr5:129550778-129559499:+	426	AAGCACTCCCTGCCCAGTGCCTACCGGACAGTGCGGCGGTCAAGTATGTGCCTCCGACCG	GENCODE	+	Nucleus	ASMM10LNC1A113257662V4	129559499	129550778	lncRNA	exon sense-overlapping	ENSMUST00000053737	Sfswap
ENSMUST00000214091	3.61118e-05	0.00193332	5.72233	up	Yes	chr9	predicted gene, 39464 [Source:MGI Symbol;Acc:MGI:5622349]	ENSMUSG00000111785	Gm39464	Reliable	chr9:122047088-122052647:+	2169	TCACAGTACCCCAGAGGAATAGACAAGAGGATGAAAGTTCAAGGTCACACATACTTTCAT	GENCODE	+		ASMM10LNC1A100026644V4	122052647	122047088	lncRNA	intergenic
ENSMUST00000151537	0.000151881	0.00372979	5.69841	down	No	chr11	heterogeneous nuclear ribonucleoprotein H1 [Source:MGI Symbol;Acc:MGI:1891925]	ENSMUSG00000007850	Hnrnph1	Gold	chr11:50384963-50386225:+	677	GGTGATTTTGGTATTATAGTCTTACCCTACAAAATCCTTTTGCAGACCAAGTTTTACAGG	GENCODE	+	Nucleus	ASMM10LNC1A106718622V4	50386225	50384963	lncRNA	exon sense-overlapping	ENSMUST00000069304	Hnrnph1
ENSMUST00000034183	7.57722e-07	0.00024129	5.69194	down	Yes	chr8	colorectal neoplasia differentially expressed (non-protein coding) [Source:MGI Symbol;Acc:MGI:1918546]	ENSMUSG00000031736	Crnde	Reliable	chr8:92326038-92356120:-	1238	GTCACCTCTTTAAATCTTGATGCCGTGCCGTGAACCCCAGCTCTCCTACGGGAAGATGGG	GENCODE	-		ASMM10LNC1A109397010V4	92356120	92326038	lncRNA	intergenic
AK039610	0.00658991	0.0330371	5.66177	up	Yes	chr7		AK039610	AK039610		chr7:7122159-7123843:+	1538	CAGCGCCACATTGTCCCTCCATACATGGTATTTTCATTTACATTGGAATTTAAGAATTTT	Genbank	+		ASMM10P037319V4	7123843	7122159	lncRNA	intergenic
ENSMUST00000144230	3.87351e-05	0.00201123	5.64118	down	Yes	chr11	predicted gene 11695 [Source:MGI Symbol;Acc:MGI:3649841]	ENSMUSG00000085651	Gm11695	Reliable	chr11:115462045-115463454:-	407	CAGCACCAACTTTCCTACCACCGGGAGATCAACCTGAGCTCACCACCAGCGAGCAAGCTG	GENCODE	-		ASMM10LNC1A100025987V4	115463454	115462045	lncRNA	natural antisense	ENSMUST00000092445	Slc16a5
ENSMUST00000181740	0.00148412	0.013209	5.60814	up	No	chr10	methionine aminopeptidase 2 [Source:MGI Symbol;Acc:MGI:1929701]	ENSMUSG00000036112	Metap2	Reliable	chr10:93889928-93891129:-	404	TCTCCCCCGCCTCCAAGATCAAGACCATATTGGCCTCGCATTTACAGAGATTCTCCCGCT	GENCODE	-	Exosome	ASMM10LNC1A108947441V4	93891129	93889928	lncRNA	exon sense-overlapping	ENSMUST00000180840	Metap2
ENSMUST00000141870	4.34745e-06	0.000670437	5.56561	down	No	chr4	asparagine-linked glycosylation 6 (alpha-1,3,-glucosyltransferase) [Source:MGI Symbol;Acc:MGI:2444031]	ENSMUSG00000073792	Alg6	Reliable	chr4:99715676-99746384:+	378	ACCAGTCAAACAGTGGATAAAGTCGCTAATATTTGGTGCAGCGTTAATGTCTTTCTGAAG	GENCODE	+	Nucleus	ASMM10LNC1A105121729V4	99746384	99715676	lncRNA	exon sense-overlapping	ENSMUST00000107004	Alg6
ENSMUST00000197054	8.97755e-06	0.00100516	5.54999	down	Yes	chr3	predicted gene 42949 [Source:MGI Symbol;Acc:MGI:5663086]	ENSMUSG00000105401	Gm42949	Gold	chr3:151333349-151337638:+	2202	CCTCGTCCCTAGAAAGATTTTGTTCCACGGGAATATAAAATATAGAAAATTCAGAAACCG	GENCODE	+		ASMM10LNC1A100111482V4	151337638	151333349	lncRNA	intergenic
AK144448	3.167e-07	0.000165223	5.5331	up	Yes	chr15		AK144448	AK144448		chr15:55132156-55133877:-	1722	AAGCCCTCTAAAGTGATATCAAGGAACACCGAAGCTATGGTTGCTTTTGGTTAAGGGGCA	Genbank	-		ASMM10P012560V4	55133877	55132156	lncRNA	natural antisense	ENSMUST00000023056	Deptor
ENSMUST00000188120	0.000147611	0.00370462	5.51221	down	No	chr9	testis expressed gene 264 [Source:MGI Symbol;Acc:MGI:1096570]	ENSMUSG00000040813	Tex264	Reliable	chr9:106662390-106685909:-	436	GTGGGGCCGCCGCTGAGGTGCCTCCTGAGAAGTGCCGCTGTGCAGTCGGCAGCATCCTGA	GENCODE	-		ASMM10LNC1A116832624V4	106685909	106662390	lncRNA	exon sense-overlapping	uc009rkm.1	Tex264
ENSMUST00000221765	3.81953e-05	0.00200117	5.50619	down	Yes	chr13	predicted gene, 35161 [Source:MGI Symbol;Acc:MGI:5594320]	ENSMUSG00000113121	Gm35161	Reliable	chr13:68998793-69031474:+	941	ACAGAGGTGGACACGTGCCAGCCAACACAGGAATACAGGTTCTTCTTGTGCATCCTGGGA	GENCODE	+		ASMM10LNC1A102157685V4	69031474	68998793	lncRNA	natural antisense	ENSMUST00000022013	Adcy2
*P-values adjusted using Benjamini–Hochberg FDR method.

## Sheet: Sheet2
Transcript_ID	P-value	FDR	Fold Change	Regulation	Canonical	chrom	description	GeneID	GeneSymbol	Is_CancerGene	lncRNA_level	Locus	refseqID	RNAlength	Sequence	source	strand	Subcellular_Localization	ProbeName	txEnd	txStart	type	relationship	Associated_gene_acc	Associated_gene_name	Associated_protein_name	Associated_gene_strand	associated_gene_start	Associated_gene_end	group-20m(raw)	group-3m(raw)	group-20m(normalized)	group-3m(normalized)	[20m-1, 20m](raw)	[20m-2, 20m](raw)	[20m-3, 20m](raw)	[20m-4, 20m](raw)	[20m-5, 20m](raw)	[3m-1, 3m](raw)	[3m-2, 3m](raw)	[3m-3, 3m](raw)	[3m-4, 3m](raw)	[3m-5, 3m](raw)	[20m-1, 20m](normalized)	[20m-2, 20m](normalized)	[20m-3, 20m](normalized)	[20m-4, 20m](normalized)	[20m-5, 20m](normalized)	[3m-1, 3m](normalized)
ENSMUST00000233864	9.13e-11	2.239e-06	115.858	down	No	chr17	serine/threonine kinase 38 [Source:MGI Symbol;Acc:MGI:2442572]	ENSMUSG00000024006	Stk38		Reliable	chr17:28975849-28991383:-		694	TGAACCACAGCCTGCCCAGTGATTTCAAACATGAATTCCAAAAGGAAAGCAGAGACCTGG	GENCODE	-	Nucleus	ASMM10LNC1A106310484V4	28991383	28975849	lncRNA	exon sense-overlapping	ENSMUST00000119274	Stk38		-	28970880	29007995	41.1243	6517.52	5.54182	12.398	34.9475	46.3476	45.1202	34.3727	44.8332	4585.73	6822.45	7653.33	8207.57	5318.51	5.21838	5.53766	5.81406	5.40495	5.73405	12.1976
ENSMUST00000187202	3.2364e-08	4.668e-05	67.5355	down	No	chr1	dipeptidylpeptidase 10 [Source:MGI Symbol;Acc:MGI:2442409]	ENSMUSG00000036815	Dpp10		Reliable	chr1:123608107-123650360:-		285	TCCCCAGATTTAAAGTATGTTCTCCTGGCATACGACGTTAAGCAGTTTTAGATGGTAATT	GENCODE	-		ASMM10LNC1A105983211V4	123650360	123608107	lncRNA	exon sense-overlapping	ENSMUST00000112603	Dpp10		-	123332142	124045163	5.6821	515.669	2.52862	8.60619	5	5	5	5	8.41051	210.316	321.462	730.396	774.721	541.45	2.33259	2.33065	2.33871	2.35905	3.2821	7.79226
ENSMUST00000222823	5.1461e-08	6.0087e-05	46.706	down	Yes	chr13	predicted gene, 40841 [Source:MGI Symbol;Acc:MGI:5623726]	ENSMUSG00000113216	Gm40841		Reliable	chr13:28394453-28420066:-		3989	TGCAGTGTGGATGTCCCTGCCCATTCAAATGAGGAAGAGCAAACAGTTTTGTACCAGTGT	GENCODE	-		ASMM10LNC1A105173684V4	28420066	28394453	lncRNA	intergenic							51.9834	3581.83	5.85371	11.3992	54.5881	73.6938	56.1242	31.5687	43.9422	2220.48	3389.04	5086.44	5362.97	1850.22	5.88334	6.23657	6.15995	5.2821	5.70657	11.1068
ENSMUST00000147045	4.656e-09	2.3291e-05	45.2407	down	Yes	chr6	predicted gene 15082 [Source:MGI Symbol;Acc:MGI:3705124]	ENSMUSG00000087053	Gm15082		Gold	chr6:113937739-113940206:+		1960	TCCTGTCTTTGTCTCTTATTCCCTGCCCTTTGGTCCTCTCAGGCAAATAAATCTTTGTGC	GENCODE	+		ASMM10LNC1A100004808V4	113940206	113937739	lncRNA	intronic antisense	ENSMUST00000101045	Atp2b2		-	113743831	114042026	422.788	26902.2	8.95483	14.4544	352.419	530.409	324.305	445.453	461.354	14086.2	19691.6	43279.7	40175.1	17278.3	8.68029	9.15148	8.86831	9.04719	9.02689	13.9544
ENSMUST00000195940	1.27591e-08	2.6071e-05	44.9571	down	No	chr3	RIKEN cDNA 4632404H12 gene [Source:MGI Symbol;Acc:MGI:1921284]	ENSMUSG00000042579	4632404H12Rik		Reliable	chr3:89768121-89772791:-		4671	CCTATATAAGCCCTGCCCTTTGTTCAATCTCTGCTGTCCATTTCCAGAAGCCACCCCTGG	GENCODE	-	Nucleus;Cytoplasm	ASMM10LNC1A101520924V4	89772791	89768121	lncRNA	intergenic							362.685	23405	8.72477	14.2152	321.418	427.912	272.521	345.894	445.683	11345.8	16925.5	38064	35845.7	14844	8.5444	8.79458	8.59904	8.708	8.97785	13.594
ENSMUST00000129027	8.549e-09	2.3291e-05	44.4673	down	No	chr10	transcription factor 3 [Source:MGI Symbol;Acc:MGI:98510]	ENSMUSG00000020167	Tcf3		Reliable	chr10:80412627-80415487:-		819	TGACTGTCCCTGCCCAGTTTGCTACACTGTGGCACTAATGACCAGTCCTGCCTCATACTG	GENCODE	-		ASMM10LNC1A100011613V4	80415487	80412627	lncRNA	exon sense-overlapping	ENSMUST00000105344	Tcf3		-	80409514	80433637	58.2635	3900.77	6.059	11.5337	58.8437	71.5915	60.9452	49.4948	50.4421	2539.84	3495.39	5550.04	5856.31	2062.27	5.99214	6.19511	6.28618	5.91582	5.90574	11.3093
ENSMUST00000140361	2.0548e-07	0.000129189	32.3862	down	No	chr1	dipeptidylpeptidase 10 [Source:MGI Symbol;Acc:MGI:2442409]	ENSMUSG00000036815	Dpp10		Reliable	chr1:123625839-124045255:-		656	TCTCCTGGCATACGACGTTAAGCAGATTTTGAAGCATGAAGTCTGAAACGATGTCTCTCT	GENCODE	-		ASMM10LNC1A105478294V4	124045255	123625839	lncRNA	exon sense-overlapping	ENSMUST00000112603	Dpp10		-	123332142	124045163	5.36323	240.706	2.46352	7.48083	5	5	5	5	6.81617	83.0499	135.984	361.854	361.208	261.435	2.33259	2.33065	2.33871	2.35905	2.95659	6.47579
ENSMUST00000140361	2.0548e-07	0.000129189	32.3862	down	No	chr1	dipeptidylpeptidase 10 [Source:MGI Symbol;Acc:MGI:2442409]	ENSMUSG00000036815	Dpp10		Reliable	chr1:123625839-124045255:-		656	TCTCCTGGCATACGACGTTAAGCAGATTTTGAAGCATGAAGTCTGAAACGATGTCTCTCT	GENCODE	-		ASMM10LNC1A105478294V4	124045255	123625839	lncRNA	exon sense-overlapping	ENSMUST00000112606	Dpp10		-	123321471	124045559	5.36323	240.706	2.46352	7.48083	5	5	5	5	6.81617	83.0499	135.984	361.854	361.208	261.435	2.33259	2.33065	2.33871	2.35905	2.95659	6.47579
ENSMUST00000151652	5.88157e-07	0.000211982	27.6998	down	Yes	chr11	breast carcinoma amplified sequence 3, opposite strand 1 [Source:MGI Symbol;Acc:MGI:1918739]	ENSMUSG00000086199	Bcas3os1		Gold	chr11:85702200-85719744:-	NR_045875	3138	TGTCTGATGTTCTGAATACGGCCATGACACCAAGGAACCCCGCCTGAAAACTTCAGCTCA	GENCODE	-		ASMM10LNC1A103136888V4	85719744	85702200	lncRNA	intronic antisense	ENSMUST00000108062	Bcas3		+	85353167	85826058	36.9285	1334.41	5.29442	10.0862	31.3035	30.9028	36.1364	22.5077	63.792	1132.92	1826.35	1176.95	1430.06	1105.79	5.05232	4.93114	5.46757	4.78653	6.23457	10.171
TCONS_00015184	4.166e-10	5.108e-06	24.8213	down	Yes	chr18		XLOC_011520	XLOC_011520			chr18:42615652-42619327:-		2411	GTTTTGTGGGATTCGGACAATGCTCCCTGCCCTTCTCCATACTCATTTTCTTCATCATCT	Alexander et al 2013	-		ASMM10P017807V4	42619327	42615652	lncRNA	intergenic							1241.93	40071.7	10.544	15.1775	1186.66	1278.44	1022.63	1204.71	1517.2	30352.1	37523.5	53555.9	51911.8	27015.4	10.4724	10.533	10.6561	10.406	10.6524	15.1653
ENSMUST00000176476	5.20331e-06	0.000729058	24.5747	down	No	chr4	basonuclin 2 [Source:MGI Symbol;Acc:MGI:2443805]	ENSMUSG00000028487	Bnc2		Reliable	chr4:84293635-84533396:-		541	AAGCTACTCATAATTGAAATTCTCCAGGCAAATCAGATATCAACATTTCCAACAGAACGG	GENCODE	-	Exosome	ASMM10LNC1A100097592V4	84533396	84293635	lncRNA	exon sense-overlapping	ENSMUST00000175756	Bnc2		-	84391052	84675078	7.7927	235.885	2.86765	7.48675	9.00495	5	5	5	14.9585	90.587	145.095	352.629	344.968	246.144	3.17235	2.33065	2.33871	2.35905	4.1375	6.59677
ENSMUST00000142943	3.89634e-08	5.2119e-05	23.8503	down	No	chr2	solute carrier family 39 (metal ion transporter), member 13 [Source:MGI Symbol;Acc:MGI:1915677]	ENSMUSG00000002105	Slc39a13		Reliable	chr2:91068431-91068871:-		360	CCATGGCCGGTTGAGAGCGCCCGGCATGCCTGGATGTCCCTGCCCTGGCTGTGGTATGGC	GENCODE	-		ASMM10LNC1A115526037V4	91068871	91068431	lncRNA	exon sense-overlapping	ENSMUST00000073575	Slc39a13		-	91061791	91070417	205.79	7024.25	7.89673	12.4727	243.703	232.29	210.713	161.631	180.611	4947.67	7784.35	8610.74	9607.47	4171.04	8.13533	7.85515	8.20278	7.61079	7.67962	12.3155
ENSMUST00000124403	1.23893e-05	0.0012055	22.7417	down	No	chr2	MACRO domain containing 2 [Source:MGI Symbol;Acc:MGI:1920149]	ENSMUSG00000068205	Macrod2		Gold	chr2:140395460-140420495:+		1049	AGCCAGCCACCCCCACGGCAGCATGTACCCCAGCAACAAGAAGAAAAAGAACGTTTGCTG	GENCODE	+		ASMM10LNC1A105092784V4	140420495	140395460	lncRNA	exon sense-overlapping	ENSMUST00000078027	Macrod2		+	140395435	142384388	445.823	10832.9	8.68057	13.1878	262.105	273.751	153.136	509.186	1030.94	8233.64	12348.4	10753.4	14310.6	8518.29	8.24079	8.08864	7.70618	9.227	10.1403	13.0864
AK140170	2.12853e-08	4.0147e-05	21.6631	down	Yes	chr3		AK140170	AK140170			chr3:17852629-17853401:+		772	AGAAAGAGACTCTATAGCAGTCCCTGCCCCTTCCTTCTACTAGCTAAGGAAAAAGTAAAA	Genbank	+		ASMM10P025656V4	17853401	17852629	lncRNA	intergenic							266.916	8392.59	8.28623	12.7234	272.422	308.492	292.059	227.352	234.257	5662.18	7515.73	10892	12885.3	5007.71	8.29547	8.26284	8.69639	8.12236	8.05409	12.5172
AK016451	0.00153877	0.0134897	16.7652	down	Yes	chr7		AK016451	AK016451			chr7:92081088-92082536:-		1448	CACTGCCCAGTCTCCAGATTCTTTTAAAGATAAGCCAAGAATCTAGACTTTATGTAAAAT	Genbank	-		ASMM10P036503V4	92082536	92081088	lncRNA	intronic antisense	ENSMUST00000074273	Dlg2		+	91090728	92447003	47.5441	1911.6	5.74495	9.81235	41.9372	64.2345	41.9126	40.5145	49.1217	302.154	3261.17	2310.23	3496.08	188.367	5.4904	6.02927	5.69559	5.64069	5.86879	8.30438
ENSMUST00000147654	0.00136913	0.0125125	14.2953	down	No	chr4	RIKEN cDNA 1700047F07 gene [Source:MGI Symbol;Acc:MGI:1920570]	ENSMUSG00000085549	1700047F07Rik		Reliable	chr4:107707057-107708644:+		386	TCCTTTAGTCGAGCTCTTCCCAACGTTGCTGATTAGAACCCAGTGCTCTCCGGGAAGCAC	GENCODE	+		ASMM10LNC1A104137955V4	107708644	107707057	lncRNA	intergenic							33.7061	1089.73	5.24678	9.08424	37.2968	30.5102	29.6073	34.1879	36.9284	175.106	2144.3	1051.59	1923.1	154.542	5.30846	4.91012	5.16123	5.39666	5.45743	7.52826
ENSMUST00000197091	2.77639e-07	0.000147994	13.685	down	No	chr5	RIKEN cDNA 4930584F24 gene [Source:MGI Symbol;Acc:MGI:1923192]	ENSMUSG00000029044	4930584F24Rik		Gold	chr5:26460072-26493314:-		954	TATCCTCCAAGTAACATCCTAAGTTCTGAGCTATAGTTACCCAGCTCTTCCCAGTCCTGA	GENCODE	-		ASMM10LNC1A110882397V4	26493314	26460072	lncRNA	intergenic							136.745	2779.7	7.29151	11.066	148.614	129.911	110.908	134.063	160.228	1533.86	3207.77	3667.76	3802.46	1686.62	7.3745	7.0375	7.20288	7.33886	7.50381	10.5909
uc029sug.1	7.05431e-05	0.0025629	13.4294	down	Yes	chr15	n/a	AK155692	AK155692		Reliable	chr15:86194749-86195280:+		532	GAGGTCTTGGGGCCGAAACGATCTCAACCTATTCTCAAACTTTAAATGGGTAAGAAGCCC	knownGene	+		ASMM10LNC1A100064121V4	86195280	86194749	lncRNA	intergenic							181.735	3970.37	7.67225	11.4196	166.111	148.633	129.826	185.892	278.211	1921.74	6761.05	3941.97	5939.77	1287.32	7.54976	7.22559	7.45269	7.81655	8.31666	10.8993
AK013270	8.02902e-08	6.6582e-05	13.1573	down	Yes	chr4		AK013270	AK013270			chr4:99655717-99656013:-		300	GAGTGTCCTCCGGACTGTAGGGCTTCTTACCACCCTGCCCTCTCCGCCCCCTGCATTTTT	Genbank	-		ASMM10P027470V4	99656013	99655717	lncRNA	intergenic							1665.44	29256.4	10.9781	14.6959	1651.05	1986.59	1546.54	1437.84	1705.18	22684	29534.8	37642.3	38331.2	18089.5	10.9627	11.1734	11.3067	10.6319	10.8159	14.707
ENSMUST00000125317	4.07655e-06	0.000644885	13.0916	down	Yes	chr17	RIKEN cDNA 1700030A11 gene [Source:MGI Symbol;Acc:MGI:1921429]	ENSMUSG00000085333	1700030A11Rik		Gold	chr17:28905265-28906771:+	NR_045457	888	TACCCTGCCTTTAAAAATGCCGCCCTCGTTTTTAGACAATTAAATGAAGAGGGTATTGTG	GENCODE	+		ASMM10LNC1A100110978V4	28906771	28905265	lncRNA	natural antisense	ENSMUST00000062357	4930539E08Rik		-	28896392	28915324	19.7513	392.101	4.43919	8.14977	17.2218	26.6362	17.6457	17.7756	19.4772	175.816	325.125	598.422	679.087	182.054	4.15692	4.71287	4.3576	4.4429	4.52567	7.53495
ENSMUST00000129432	2.27437e-06	0.000457112	12.8522	down	No	chr11	predicted gene 12162 [Source:MGI Symbol;Acc:MGI:3649481]	ENSMUSG00000085476	Gm12162		Reliable	chr11:45409042-45420784:-		127	ACACCTGCCAGCCACCCAGACTCGGGCAAATGACATTACACTGTACCATCGCAAAGGGAT	GENCODE	-		ASMM10LNC1A100628043V4	45420784	45409042	lncRNA	intergenic							52.6897	966.934	5.82487	9.50882	42.8665	48.254	35.6503	47.8411	88.8368	440.763	608.124	1215.31	1630.79	939.684	5.52217	5.59815	5.44285	5.86779	6.69339	8.82423
ENSMUST00000144941	1.71455e-06	0.000385987	12.7901	down	No	chr4	dpy-19-like 4 (C. elegans) [Source:MGI Symbol;Acc:MGI:2685869]	ENSMUSG00000045205	Dpy19l4		Reliable	chr4:11303423-11322047:-		562	TGATAGAGATGAGGAACATCTGTAGAACCCCGCCAAAGGAAAAAGCAAAGAACTTCAGGA	GENCODE	-	Nucleus	ASMM10LNC1A115762328V4	11322047	11303423	lncRNA	exon sense-overlapping	ENSMUST00000128024	Dpy19l4		-	11276872	11322137	9.33745	145.381	3.28546	6.96241	10.6373	6.00408	9.80518	6.2125	14.0282	125.437	168.684	133.739	166.089	132.953	3.42588	2.57182	3.4437	2.94722	4.03867	7.0551
ENSMUST00000154871	3.68355e-07	0.000179158	12.2679	down	No	chr11	formin-like 1 [Source:MGI Symbol;Acc:MGI:1888994]	ENSMUSG00000055805	Fmnl1		Gold	chr11:103185228-103190658:+		829	CCAGTCCTCTGCCCTTACTTCCCAAATACTGGAATTACAGGCTGACCCCTGCCCACAGCA	GENCODE	+		ASMM10LNC1A109068715V4	103190658	103185228	lncRNA	exon sense-overlapping	ENSMUST00000107027	Fmnl1		+	103171313	103198895	313.297	6059.68	8.53278	12.1496	314.57	333.514	301.405	297.581	319.416	3043.71	4884.55	9227.67	9666.64	3475.82	8.50829	8.38821	8.74824	8.50632	8.51283	11.5757
mouselincRNA0344-	2.35417e-07	0.000134243	11.5442	down	Yes	chr12		mouselincRNA0344	mouselincRNA0344			chr12:100529800-100535875:-		6075	ACTGATTTCTCAAATCCTGTTTCCAAGAAAATCCTGTCCCTGCCCCTGGGACTGCAATAT	lincRNA	-		mouselincRNA0344-_P1V4	100535875	100529800	lncRNA	intergenic							146.429	2486.8	7.39591	10.925	156.207	174.562	157.802	112.349	131.226	1750.64	2472.9	3279.46	3483.23	1447.78	7.45588	7.45197	7.75476	7.0849	7.23204	10.7765
ENSMUST00000218247	6.05168e-07	0.000211982	11.298	down	No	chr10	predicted gene, 40709 [Source:MGI Symbol;Acc:MGI:5623594]	ENSMUSG00000112641	Gm40709		Reliable	chr10:78352571-78353702:+		754	TAATAAATCCCCAGCTCTCTTCAACTACATAAGCTGCTGTGACCACCAGCAAACAGGTTC	GENCODE	+		ASMM10LNC1A100047826V4	78353702	78352571	lncRNA	intergenic							77.7016	1336.54	6.46862	9.96661	77.2438	78.193	62.0722	77.908	93.091	610.143	1209.78	1894.26	2090.98	877.516	6.38897	6.32677	6.31724	6.55578	6.75434	9.28738
ENSMUST00000211880	1.58292e-06	0.000376828	10.5632	down	No	chr8	microtubule-associated protein 1S [Source:MGI Symbol;Acc:MGI:2443304]	ENSMUSG00000019261	Map1s		Reliable	chr8:70905990-70911479:+		353	TCTCCAGCATTGTGAAAGCTCGTCCCTGCCCAGTGGGTTGAGTCACCACCTACAGCTGCA	GENCODE	+	Cytoplasm	ASMM10LNC1A105736351V4	70911479	70905990	lncRNA	exon sense-overlapping	ENSMUST00000213001	Map1s		+	70906262	70912997	194.098	3127.98	7.80271	11.2037	205.411	228.857	226.196	136.972	173.055	1981.76	2892.15	4293.09	4833.81	1639.1	7.87316	7.83507	8.31346	7.37343	7.61842	10.9434
ENSMUST00000211880	1.58292e-06	0.000376828	10.5632	down	No	chr8	microtubule-associated protein 1S [Source:MGI Symbol;Acc:MGI:2443304]	ENSMUSG00000019261	Map1s		Reliable	chr8:70905990-70911479:+		353	TCTCCAGCATTGTGAAAGCTCGTCCCTGCCCAGTGGGTTGAGTCACCACCTACAGCTGCA	GENCODE	+	Cytoplasm	ASMM10LNC1A105736351V4	70911479	70905990	lncRNA	exon sense-overlapping	ENSMUST00000212511	Map1s		+	70905990	70911895	194.098	3127.98	7.80271	11.2037	205.411	228.857	226.196	136.972	173.055	1981.76	2892.15	4293.09	4833.81	1639.1	7.87316	7.83507	8.31346	7.37343	7.61842	10.9434
ENSMUST00000211880	1.58292e-06	0.000376828	10.5632	down	No	chr8	microtubule-associated protein 1S [Source:MGI Symbol;Acc:MGI:2443304]	ENSMUSG00000019261	Map1s		Reliable	chr8:70905990-70911479:+		353	TCTCCAGCATTGTGAAAGCTCGTCCCTGCCCAGTGGGTTGAGTCACCACCTACAGCTGCA	GENCODE	+	Cytoplasm	ASMM10LNC1A105736351V4	70911479	70905990	lncRNA	exon sense-overlapping	ENSMUST00000019405	Map1s		+	70905932	70917527	194.098	3127.98	7.80271	11.2037	205.411	228.857	226.196	136.972	173.055	1981.76	2892.15	4293.09	4833.81	1639.1	7.87316	7.83507	8.31346	7.37343	7.61842	10.9434
ENSMUST00000200218	1.73207e-05	0.00139247	10.4558	down	No	chr7	chromodomain helicase DNA binding protein 2 [Source:MGI Symbol;Acc:MGI:2448567]	ENSMUSG00000078671	Chd2	Yes	Gold	chr7:73539798-73541525:-		1387	ACTACTAGATAGGACTCTTGCTTTGGACCTACTACATGGATCAGTAAATACCTGGGCACA	GENCODE	-	Nucleus	ASMM10LNC1A109623237V4	73541525	73539798	lncRNA	exon sense-overlapping	ENSMUST00000169922	Chd2		-	73426638	73541746	22.7703	284.839	4.52877	7.915	24.7864	27.9639	8.79562	20.4912	31.8143	288.028	300.974	336.988	248.584	249.623	4.70683	4.78489	3.273	4.64087	5.23828	8.23875
ENSMUST00000200218	1.73207e-05	0.00139247	10.4558	down	No	chr7	chromodomain helicase DNA binding protein 2 [Source:MGI Symbol;Acc:MGI:2448567]	ENSMUSG00000078671	Chd2	Yes	Gold	chr7:73539798-73541525:-		1387	ACTACTAGATAGGACTCTTGCTTTGGACCTACTACATGGATCAGTAAATACCTGGGCACA	GENCODE	-	Nucleus	ASMM10LNC1A109623237V4	73541525	73539798	lncRNA	exon sense-overlapping	ENSMUST00000197642	Chd2		-	73507890	73541736	22.7703	284.839	4.52877	7.915	24.7864	27.9639	8.79562	20.4912	31.8143	288.028	300.974	336.988	248.584	249.623	4.70683	4.78489	3.273	4.64087	5.23828	8.23875
ENSMUST00000200218	1.73207e-05	0.00139247	10.4558	down	No	chr7	chromodomain helicase DNA binding protein 2 [Source:MGI Symbol;Acc:MGI:2448567]	ENSMUSG00000078671	Chd2	Yes	Gold	chr7:73539798-73541525:-		1387	ACTACTAGATAGGACTCTTGCTTTGGACCTACTACATGGATCAGTAAATACCTGGGCACA	GENCODE	-	Nucleus	ASMM10LNC1A109623237V4	73541525	73539798	lncRNA	exon sense-overlapping	ENSMUST00000026895	Chd2		-	73500980	73541745	22.7703	284.839	4.52877	7.915	24.7864	27.9639	8.79562	20.4912	31.8143	288.028	300.974	336.988	248.584	249.623	4.70683	4.78489	3.273	4.64087	5.23828	8.23875
uc.239+	0.000678773	0.00836542	10.219	down	Yes	chr4		uc.239	uc.239			chr4:6913609-6913909:+		300	CCTTAATGAACCCCGCTGATTCCATTTAGTAAAGCATGCCTCAAAGTTATAATCAAGAGG	UCR	+		ASMM10UP148V4	6913909	6913609	lncRNA	intronic antisense	ENSMUST00000039987	Tox		-	6686353	6990799	366.894	7548.35	8.70768	12.0609	347.515	290.91	273.838	399.684	522.522	4109.74	953.985	11804.3	16697	4176.69	8.66031	8.17909	8.60723	8.89874	9.19306	12.0236
ENSMUST00000148524	0.0001624	0.00385726	10.0686	down	No	chr4	dpy-19-like 4 (C. elegans) [Source:MGI Symbol;Acc:MGI:2685869]	ENSMUSG00000045205	Dpy19l4		Reliable	chr4:11317096-11322100:-		471	AGTTGCTCCGCAGTGGAAAGCAGGACGAGCTTGGGAACATCTGTAGAACCCCGCCAAAGG	GENCODE	-	Nucleus	ASMM10LNC1A109043224V4	11322100	11317096	lncRNA	exon sense-overlapping	ENSMUST00000128024	Dpy19l4		-	11276872	11322137	11.3655	103.686	3.13795	6.46973	5.59301	33.0056	6.21136	5	7.01737	76.8333	111.487	113.868	116.604	99.637	2.54983	5.03478	2.74283	2.35905	3.00325	6.37034
ENSMUST00000148524	0.0001624	0.00385726	10.0686	down	No	chr4	dpy-19-like 4 (C. elegans) [Source:MGI Symbol;Acc:MGI:2685869]	ENSMUSG00000045205	Dpy19l4		Reliable	chr4:11317096-11322100:-		471	AGTTGCTCCGCAGTGGAAAGCAGGACGAGCTTGGGAACATCTGTAGAACCCCGCCAAAGG	GENCODE	-	Nucleus	ASMM10LNC1A109043224V4	11322100	11317096	lncRNA	exon sense-overlapping	ENSMUST00000084892	Dpy19l4		-	11261315	11322137	11.3655	103.686	3.13795	6.46973	5.59301	33.0056	6.21136	5	7.01737	76.8333	111.487	113.868	116.604	99.637	2.54983	5.03478	2.74283	2.35905	3.00325	6.37034
ENSMUST00000128607	3.349e-07	0.000171078	9.89571	down	No	chr4	mitochondrial trans-2-enoyl-CoA reductase [Source:MGI Symbol;Acc:MGI:1349441]	ENSMUSG00000028910	Mecr		Reliable	chr4:131864778-131867776:+		743	TGACATATGGTCCCTGCCTCTAATTCTTTAAGTCAGAGGTTAAAACTGGGAAGCTATATA	GENCODE	+	Cytoplasm	ASMM10LNC1A100092371V4	131867776	131864778	lncRNA	exon sense-overlapping	ENSMUST00000030742	Mecr		+	131843470	131867786	38.1008	538.019	5.40763	8.71443	36.2404	54.846	35.7427	33.0462	30.6288	309.451	473.578	743.316	811.747	352.002	5.26574	5.79108	5.44865	5.34668	5.18599	8.33443
ENSMUST00000181159	5.03388e-07	0.000211982	9.65919	down	No	chr8	predicted gene 2694 [Source:MGI Symbol;Acc:MGI:3780864]	ENSMUSG00000097248	Gm2694		Gold	chr8:87472812-87525554:+	NR_033430	682	CCCAGCTGAACACAGGACCAGAGGGGATACTGCCTGCTCAGGAAAGCCAAGAGGAGCCTG	GENCODE	+		ASMM10LNC1A104652878V4	87525554	87472812	lncRNA	intergenic							9.49175	114.726	3.30473	6.57663	8.50666	14.7658	8.36245	9.23907	6.58476	59.7283	111.097	121.483	152.151	129.17	3.09486	3.83477	3.19131	3.49708	2.9056	6.03605
ENSMUST00000160528	0.00062929	0.00801985	9.35379	down	No	chr17	complement component 4A (Rodgers blood group) [Source:MGI Symbol;Acc:MGI:98320]	ENSMUSG00000015451	C4a		Reliable	chr17:34811114-34823464:-		4477	GCAGCTATTTGAGGGTCGTCGGAGCCGCCGCAGGAGGGAGGCCCCCAAGCTGACCTCTCT	GENCODE	-		ASMM10LNC1A117684793V4	34823464	34811114	lncRNA	exon sense-overlapping	uc008cdn.1	C4b		-	34732170	34813867	7.5553	109.394	3.0201	6.24565	8.5373	5	8.52821	8.14695	7.56402	83.5955	233.094	83.0596	118.195	29.026	3.09858	2.33065	3.22299	3.32604	3.12225	6.48837
ENSMUST00000160528	0.00062929	0.00801985	9.35379	down	No	chr17	complement component 4A (Rodgers blood group) [Source:MGI Symbol;Acc:MGI:98320]	ENSMUSG00000015451	C4a		Reliable	chr17:34811114-34823464:-		4477	GCAGCTATTTGAGGGTCGTCGGAGCCGCCGCAGGAGGGAGGCCCCCAAGCTGACCTCTCT	GENCODE	-		ASMM10LNC1A117684793V4	34823464	34811114	lncRNA	exon sense-overlapping	uc008cdm.3	C4b		-	34728380	34814438	7.5553	109.394	3.0201	6.24565	8.5373	5	8.52821	8.14695	7.56402	83.5955	233.094	83.0596	118.195	29.026	3.09858	2.33065	3.22299	3.32604	3.12225	6.48837
ENSMUST00000163012	7.96009e-05	0.00272459	9.10714	down	No	chr6	LUC7-like 2 (S. cerevisiae) [Source:MGI Symbol;Acc:MGI:2183260]	ENSMUSG00000029823	Luc7l2	Yes	Reliable	chr6:38551531-38554007:+		2291	AATGTTGCTTTTGGGGGATAATTAACAATGTACTTTCAAATTAAAGTTCAGCACTTTCTT	GENCODE	+		ASMM10LNC1A100081877V4	38554007	38551531	lncRNA	exon sense-overlapping	ENSMUST00000161227	Luc7l2		+	38551803	38609427	99.7657	1131.69	6.63348	9.82048	87.1579	67.3362	37.3482	151.1	155.886	1061.77	1056.43	1452.23	1450.07	637.954	6.56956	6.10431	5.51456	7.51653	7.46242	10.0834
ENSMUST00000163012	7.96009e-05	0.00272459	9.10714	down	No	chr6	LUC7-like 2 (S. cerevisiae) [Source:MGI Symbol;Acc:MGI:2183260]	ENSMUSG00000029823	Luc7l2	Yes	Reliable	chr6:38551531-38554007:+		2291	AATGTTGCTTTTGGGGGATAATTAACAATGTACTTTCAAATTAAAGTTCAGCACTTTCTT	GENCODE	+		ASMM10LNC1A100081877V4	38554007	38551531	lncRNA	exon sense-overlapping	ENSMUST00000161538	Luc7l2		+	38551465	38606367	99.7657	1131.69	6.63348	9.82048	87.1579	67.3362	37.3482	151.1	155.886	1061.77	1056.43	1452.23	1450.07	637.954	6.56956	6.10431	5.51456	7.51653	7.46242	10.0834
ENSMUST00000163012	7.96009e-05	0.00272459	9.10714	down	No	chr6	LUC7-like 2 (S. cerevisiae) [Source:MGI Symbol;Acc:MGI:2183260]	ENSMUSG00000029823	Luc7l2	Yes	Reliable	chr6:38551531-38554007:+		2291	AATGTTGCTTTTGGGGGATAATTAACAATGTACTTTCAAATTAAAGTTCAGCACTTTCTT	GENCODE	+		ASMM10LNC1A100081877V4	38554007	38551531	lncRNA	exon sense-overlapping	ENSMUST00000057692	Luc7l2		+	38551465	38609470	99.7657	1131.69	6.63348	9.82048	87.1579	67.3362	37.3482	151.1	155.886	1061.77	1056.43	1452.23	1450.07	637.954	6.56956	6.10431	5.51456	7.51653	7.46242	10.0834
ENSMUST00000163012	7.96009e-05	0.00272459	9.10714	down	No	chr6	LUC7-like 2 (S. cerevisiae) [Source:MGI Symbol;Acc:MGI:2183260]	ENSMUSG00000029823	Luc7l2	Yes	Reliable	chr6:38551531-38554007:+		2291	AATGTTGCTTTTGGGGGATAATTAACAATGTACTTTCAAATTAAAGTTCAGCACTTTCTT	GENCODE	+		ASMM10LNC1A100081877V4	38554007	38551531	lncRNA	exon sense-overlapping	NM_001170848	Luc7l2		+	38551334	38609470	99.7657	1131.69	6.63348	9.82048	87.1579	67.3362	37.3482	151.1	155.886	1061.77	1056.43	1452.23	1450.07	637.954	6.56956	6.10431	5.51456	7.51653	7.46242	10.0834
ENSMUST00000163012	7.96009e-05	0.00272459	9.10714	down	No	chr6	LUC7-like 2 (S. cerevisiae) [Source:MGI Symbol;Acc:MGI:2183260]	ENSMUSG00000029823	Luc7l2	Yes	Reliable	chr6:38551531-38554007:+		2291	AATGTTGCTTTTGGGGGATAATTAACAATGTACTTTCAAATTAAAGTTCAGCACTTTCTT	GENCODE	+		ASMM10LNC1A100081877V4	38554007	38551531	lncRNA	exon sense-overlapping	ENSMUST00000163047	Luc7l2		+	38551334	38605040	99.7657	1131.69	6.63348	9.82048	87.1579	67.3362	37.3482	151.1	155.886	1061.77	1056.43	1452.23	1450.07	637.954	6.56956	6.10431	5.51456	7.51653	7.46242	10.0834
AK020372	2.95925e-05	0.00173747	8.81739	down	Yes	chr6		AK020372	AK020372			chr6:38610048-38610964:+		917	CAACTTGGGCTACAATAGAAAAACCCTGCCCTTTGGAGGAAAAAAGTAAGAAAAAATAGA	Genbank	+		ASMM10P034314V4	38610964	38610048	lncRNA	intergenic							144.21	1707.63	7.18277	10.3231	94.8212	291.542	79.0938	95.0423	160.55	1029.77	1511.49	2300.05	2797.05	899.784	6.69725	8.18359	6.68869	6.83808	7.50624	10.042
ENSMUST00000209306	2.6578e-07	0.000144821	8.05585	down	No	chr9	trafficking protein, kinesin binding 1 [Source:MGI Symbol;Acc:MGI:1914345]	ENSMUSG00000032536	Trak1	Yes	Reliable	chr9:121391961-121400795:+		651	CGCTGAAATACTTCCGGGTGTATGTGTGCTACTACCTGCAGGAACCAGCTCTCTCCCTCC	GENCODE	+		ASMM10LNC1A107949918V4	121400795	121391961	lncRNA	exon sense-overlapping	ENSMUST00000045903	Trak1		+	121367016	121474918	179.627	2130.81	7.68438	10.6944	181.592	160.086	140.852	178.987	236.62	1106.74	1805.54	2807.34	3074.26	1860.17	7.6858	7.33247	7.57735	7.75726	8.06902	10.1408
ENSMUST00000151507	2.26567e-05	0.00156051	7.80911	down	No	chr11	myosin XVB [Source:MGI Symbol;Acc:MGI:2685534]	ENSMUSG00000034427	Myo15b		Reliable	chr11:115877516-115880155:+		651	CCCCTGGCCCGCACAGCGGGGAGCCCTGGGGGAAAGTGTCAAATATGGCCACCAGGCCTT	GENCODE	+		ASMM10LNC1A116140174V4	115880155	115877516	lncRNA	exon sense-overlapping	ENSMUST00000222123	Myo15b		+	115877534	115892592	7.29505	73.4163	2.91145	5.8766	5.48238	8.30089	8.59409	9.09787	5	98.3462	29.5384	94.7075	85.0603	59.4288	2.53191	2.96673	3.23625	3.47775	2.34458	6.71469
ENSMUST00000169028	1.60497e-05	0.00136791	7.64876	down	No	chr13	Iroquois homeobox 2 [Source:MGI Symbol;Acc:MGI:1197526]	ENSMUSG00000001504	Irx2		Reliable	chr13:72628971-72630725:+		515	CCGCGGCTGCCGGCTTCCCGTCCTACGTGGCTGTTGTGGGTTCCAGGGCTCGCCATACGA	GENCODE	+	Cytoplasm	ASMM10LNC1A114615561V4	72630725	72628971	lncRNA	exon sense-overlapping	ENSMUST00000074372	Irx2		+	72628820	72634198	393.606	4642.77	8.79213	11.7274	372.782	301.552	267.022	501.559	525.116	1766.71	2979.62	7326.75	6863.15	4277.63	8.75794	8.23081	8.56333	9.20596	9.20262	10.7864
ENSMUST00000142217	2.98088e-08	4.668e-05	7.59029	down	No	chr11	proteasome (prosome, macropain) activator subunit 4 [Source:MGI Symbol;Acc:MGI:2143994]	ENSMUSG00000040850	Psme4	Yes	Reliable	chr11:30830102-30834148:+		579	CAGAAGTATAAGAAATTGAAGTACTAGAGACTAGAAATTTGTTACAGGGTATTATCTTTG	GENCODE	+	Nucleus	ASMM10LNC1A100061917V4	30834148	30830102	lncRNA	exon sense-overlapping	ENSMUST00000041231	Psme4		+	30771726	30880361	5.06799	44.8736	2.37178	5.29593	5	5.33995	5	5	5	39.8803	44.7413	48.1968	43.7518	47.7976	2.33259	2.48397	2.33871	2.35905	2.34458	5.49793
ENSMUST00000125272	1.53644e-06	0.000373004	7.40182	down	No	chr5	FMS-like tyrosine kinase 1 [Source:MGI Symbol;Acc:MGI:95558]	ENSMUSG00000029648	Flt1		Reliable	chr5:147604660-147634418:-		395	GCGCTGTGACACATACCCCGCCCGCTCCCTGCCCCCAATAAATAAATACTTTTTAAAATG	GENCODE	-	Cytoplasm	ASMM10LNC1A100044670V4	147634418	147604660	lncRNA	exon sense-overlapping	ENSMUST00000031653	Flt1		-	147561604	147726011	1046.67	11235.3	10.291	13.1789	910.914	1199.04	934.492	943.454	1245.45	8223.41	11109.5	14413.6	16565.2	5864.77	10.0637	10.4285	10.5006	10.0716	10.3905	13.0828
ENSMUST00000215823	3.46855e-06	0.000591546	7.39342	down	No	chr14	RIKEN cDNA A630023A22 gene [Source:MGI Symbol;Acc:MGI:2145657]	ENSMUSG00000095493	A630023A22Rik		Reliable	chr14:34051262-34102754:-		479	GCACCCGTGGTCACAGAGAAACAAGCTCCTACATACACCAGCCACACCAGATGCTGACCT	GENCODE	-		ASMM10LNC1A101139141V4	34102754	34051262	lncRNA	bidirectional	ENSMUST00000120077	Anxa8		+	34086025	34100021	503.942	5596.14	9.21589	12.1021	480.557	490.242	437.042	515.305	596.561	4226.15	6477.02	6913.91	7655.25	2708.36	9.12115	9.02792	9.31378	9.24211	9.37452	12.0715
ENSMUST00000153934	0.00168433	0.0142364	7.34244	down	No	chr9	multiple EGF-like-domains 11 [Source:MGI Symbol;Acc:MGI:1920951]	ENSMUSG00000036466	Megf11		Gold	chr9:64693781-64705933:+		865	CAGCAGCTTCCAGATTTGTCTCAAAGTAGCAGCCATGCCCAGTGCTTTTCCAATGCCAGC	GENCODE	+		ASMM10LNC1A107482341V4	64705933	64693781	lncRNA	exon sense-overlapping	ENSMUST00000118485	Megf11		+	64385626	64707290	19.6678	239.51	4.37422	7.25047	17.4029	25.9365	25.7839	9.53388	19.6818	50.7611	421.403	247.28	391.366	86.7412	4.17184	4.67193	4.94256	3.54341	4.54134	5.81453
ENSMUST00000144103	7.58386e-06	0.000903433	7.17926	down	No	chr7	B cell CLL/lymphoma 7C [Source:MGI Symbol;Acc:MGI:1332237]	ENSMUSG00000030814	Bcl7c		Reliable	chr7:127705794-127708075:-		486	AAGCTGTCCCTACCCTAGCACACCTCCCTGACCTCCAGTCTGTGGGGCTCATCCTTGGGC	GENCODE	-		ASMM10LNC1A100132088V4	127708075	127705794	lncRNA	exon sense-overlapping	ENSMUST00000205977	Bcl7c		-	127666796	127708639	671.336	7651.38	9.6399	12.4837	601.801	839.686	560.049	659.058	696.084	3909.76	6381.23	11545.2	12665.1	3755.58	9.45423	9.87114	9.70608	9.58424	9.58382	11.9557
ENSMUST00000211530	1.32934e-05	0.00126691	7.14977	down	No	chr7	RIKEN cDNA 0610005C13 gene [Source:MGI Symbol;Acc:MGI:1918911]	ENSMUSG00000109644	0610005C13Rik		Reliable	chr7:45570988-45575138:-		402	CAGCGAGCAGTCAGCGGCTGAAGGGCAGTCTCGTGCCAGCCATTGAAAATGCTCAAGGCA	GENCODE	-		ASMM10LNC1A112436086V4	45575138	45570988	lncRNA	natural antisense	ENSMUST00000209204	Bcat2		+	45570996	45589710	7.05534	65.0299	2.91505	5.75295	6.27224	5	7.29379	6.81897	9.89169	37.6862	83.6746	63.5498	87.8182	52.4204	2.66641	2.33065	2.97921	3.07792	3.52108	5.41692
TCONS_00013456	8.33692e-05	0.00276245	6.98613	down	Yes	chr17		XLOC_010436	XLOC_010436			chr17:9403342-9420649:-		2296	CTTCCCTTGCTTGTGTACTTAAGTCAACTGCCCTATGTGTATTTTTATACTTGACTTCCA	Alexander et al 2013	-		ASMM10P015533V4	9420649	9403342	lncRNA	intergenic							29.4089	340.103	5.03897	7.84346	27.4594	37.7405	29.0982	26.0862	26.6605	99.002	181.999	579.941	627.573	211.998	4.85583	5.22796	5.13034	4.99763	4.9831	6.72499
ENSMUST00000199953	4.68583e-05	0.00215122	6.92827	down	Yes	chr3	predicted gene 42869 [Source:MGI Symbol;Acc:MGI:5663006]	ENSMUSG00000105137	Gm42869		Reliable	chr3:100624902-100627022:-		2121	GATGGTGATTGTATTAAATAAGGTCATTTTTGGTAAAACAGCTATTTTTGCACTGTCAAT	GENCODE	-		ASMM10LNC1A100111489V4	100627022	100624902	lncRNA	intron sense-overlapping	ENSMUST00000008907	Man1a2		-	100562208	100685503	34.9599	311.489	5.1963	7.9888	29.0064	34.0015	17.0678	50.1261	44.5979	308.745	265.326	395.239	406.814	181.319	4.93569	5.08088	4.30245	5.9364	5.72611	8.33168
ENSMUST00000146368	0.0135979	0.0520077	6.89224	down	No	chr9	interactor of little elongation complex ELL subunit 2 [Source:MGI Symbol;Acc:MGI:2135947]	ENSMUSG00000032235	Ice2		Reliable	chr9:69416715-69425705:+		453	GCTTATCACCCTGATGCATGTTTTGCCCAGTGCTCATGGAGGTATTTGTGAAAAGAACCT	GENCODE	+		ASMM10LNC1A100023802V4	69425705	69416715	lncRNA	exon sense-overlapping	ENSMUST00000034761	Ice2		+	69397906	69433122	12.3152	204.087	3.74989	6.53487	11.0976	13.9951	12.7301	11.7605	11.9924	20.5896	559.438	148.642	259.93	31.8345	3.49038	3.75579	3.85648	3.84681	3.8	4.60065
ENSMUST00000122836	1.39924e-05	0.00128983	6.84584	down	No	chr15	EF-hand calcium binding domain 6 [Source:MGI Symbol;Acc:MGI:1924877]	ENSMUSG00000022441	Efcab6		Reliable	chr15:84018668-84065379:-		381	GGTGACCACCAAGCCGGCCACCGCGATCGCCAACCCAGTTCTGTCCTACTTAGACATTGA	GENCODE	-		ASMM10LNC1A105261129V4	84065379	84018668	lncRNA	exon sense-overlapping	ENSMUST00000156187	Efcab6		-	83866712	84065349	19.3291	175.914	4.40079	7.17602	23.9717	17.0424	17.9276	14.1248	23.5789	122.838	248.819	167.571	223.178	117.164	4.65808	4.04394	4.38179	4.11406	4.80608	7.02792
ENSMUST00000219021	4.81561e-06	0.00069869	6.84523	down	No	chr10	RIKEN cDNA 1110002J07 gene [Source:MGI Symbol;Acc:MGI:1915738]	ENSMUSG00000097134	1110002J07Rik		Gold	chr10:66915636-66917739:-		388	AGCGGGATGCAGTTGTAAGTAACCCAGCACTCTCCTACAGTGAGAGGGGTTGTCCAGGCA	GENCODE	-		ASMM10LNC1A106156950V4	66917739	66915636	lncRNA	intergenic							16.8234	152.101	4.18153	6.95663	14.6663	20.6168	17.6928	10.751	20.39	79.8962	166.643	189.909	205.219	118.837	3.90826	4.32558	4.36104	3.71791	4.59488	6.42718
AK030243	0.000505145	0.00713489	6.63878	down	Yes	chr1		AK030243	AK030243			chr1:96313241-96315535:+		2295	ACTCTAACCCTAACTATCTAGTAGCTGGTTCCTTTCCCAAGTTACCCTCAGGATAGTTGG	Genbank	+		ASMM10P019940V4	96315535	96313241	lncRNA	intergenic							213.242	2187.29	7.84952	10.5804	147.143	331.616	125.111	182.567	279.773	1023.27	3784.86	2341.59	3002.36	784.393	7.36122	8.37801	7.39475	7.78767	8.32597	10.0361
ENSMUST00000206138	2.57434e-06	0.000489324	6.62006	down	No	chr7	methylmalonyl CoA epimerase [Source:MGI Symbol;Acc:MGI:1920974]	ENSMUSG00000033429	Mcee		Reliable	chr7:64392607-64398782:+		327	TAGCTCCCTGAAGGGTATTGGGCACCCCGGACTCGCGCCCCGTCCCTGCCCCGTTTCCAC	GENCODE	+	Cytoplasm	ASMM10LNC1A113405850V4	64398782	64392607	lncRNA	exon sense-overlapping	ENSMUST00000037205	Mcee		+	64392645	64412125	227.571	2224	8.04068	10.7675	243.397	268.138	245.988	166.596	213.735	1630.23	2263.12	2671.94	3259.7	1295.02	8.13238	8.05185	8.44818	7.65692	7.91407	10.6716
TCONS_00008073	7.90185e-05	0.00271744	6.53501	down	No	chr13		XLOC_006216	XLOC_006216			chr13:66161347-66168976:+		497	AAAGTTCTCCAGGACATACAAGGAAGTGCATCACTGTTAGGGTTGGCTTTGAAGTTCCAC	Alexander et al 2013	+		ASMM10P055974V4	66168976	66161347	lncRNA	intergenic							9.54087	91.8406	3.33939	6.04758	8.83766	11.8514	10.6427	5.72412	10.6485	32.7915	32.2603	158.685	133.198	102.268	3.14529	3.50379	3.57959	2.83874	3.62952	5.2335
ENSMUST00000126901	1.25026e-06	0.000336884	6.52749	down	No	chr7	glucose phosphate isomerase 1 [Source:MGI Symbol;Acc:MGI:95797]	ENSMUSG00000036427	Gpi1		Reliable	chr7:34227121-34229794:-		532	ACGTCCCTGATACCTCTCCCTGGGTGTTTCCTTCTTGAACCTCAACACCAACCATGGGCA	GENCODE	-	Exosome	ASMM10LNC1A100960794V4	34229794	34227121	lncRNA	exon sense-overlapping	ENSMUST00000205800	Gpi1		-	34202407	34228997	1789.14	16905.5	11.037	13.7435	1411.88	1595.38	1400.9	2301.04	2236.51	9818.13	11167.3	26110.4	26754.5	10677.2	10.7299	10.875	11.1757	11.2329	11.1716	13.3518
AK156812	4.23905e-06	0.000657857	6.43867	down	Yes	chr11		AK156812	AK156812			chr11:46912118-46913000:+		882	TTGCAGCCACCAATTTGACATTTTAATTATGGAGATAAGAACCCAAGCAAGTGAATCATA	Genbank	+		ASMM10P048413V4	46913000	46912118	lncRNA	intronic antisense	ENSMUST00000109220	Sgcd		-	46896253	47578965	38.3067	351.619	5.40878	8.09555	33.9589	40.1668	30.9195	32.1342	54.3542	161.179	231.416	460.411	539.94	365.147	5.17477	5.32322	5.22745	5.30724	6.01124	7.40705
ENSMUST00000154574	5.97885e-07	0.000211982	6.37173	down	No	chr2	glucosidase, alpha; neutral C [Source:MGI Symbol;Acc:MGI:1923301]	ENSMUSG00000062646	Ganc		Gold	chr2:120403896-120423659:+		3099	GCCACCGCCATCTTCACAGCCATGAAGCGCCTACCCAAAGTATTGAGCCTTCTTCCGGCT	GENCODE	+	Nucleus	ASMM10LNC1A100015058V4	120423659	120403896	lncRNA	bidirectional	ENSMUST00000110729	Tmem87a		-	120363294	120404078	225.257	2162.85	8.0482	10.7199	226.178	217.59	238.647	213.702	230.169	1119.38	1521.22	2704.98	3119.65	2348.99	8.01807	7.7656	8.401	8.03262	8.0237	10.1567
ENSMUST00000150816	0.00255184	0.0181999	6.31764	down	No	chr2	double zinc ribbon and ankyrin repeat domains 1 [Source:MGI Symbol;Acc:MGI:2139080]	ENSMUSG00000037259	Dzank1		Reliable	chr2:144522463-144526648:-		288	GCTTGGTCTACAGGAGAAAACATGACTGCTGGCTCAGTGTGTGCCCCTCAGATCATACCA	GENCODE	-		ASMM10LNC1A104476472V4	144526648	144522463	lncRNA	exon sense-overlapping	ENSMUST00000081982	Dzank1		-	144470557	144527414	115.771	1383.25	7.05247	9.71186	126.428	133.463	128.492	90.4382	100.034	488.598	2032.37	1922.54	2218.17	254.564	7.12602	7.07364	7.43696	6.76813	6.85761	8.96805
ENSMUST00000133662	0.000315076	0.00555037	6.28921	down	No	chr4	protein tyrosine phosphatase 4a2 [Source:MGI Symbol;Acc:MGI:1277117]	ENSMUSG00000028788	Ptp4a2		Reliable	chr4:129820721-129839366:+		417	GCGGGGAGCGCGGCTCGAGGTTTTTCGTTGGAATATACGTTGCACATTTATGGCGATTCT	GENCODE	+	Exosome	ASMM10LNC1A111374291V4	129839366	129820721	lncRNA	exon sense-overlapping	ENSMUST00000030578	Ptp4a2		+	129820221	129849978	18.5335	130.931	4.16832	6.8212	19.2799	16.5892	5.47378	25.9994	25.3251	116.611	118.203	149.21	135.725	134.903	4.32902	4.00287	2.60434	4.99322	4.91215	6.95067
uc.193-	2.35595e-05	0.00157007	6.21822	down	No	chr9		uc.193	uc.193			chr9:88453334-88453656:-		322	GTATTTTGTGGCTGAAAAAGCAGCCTTGCTTCTTCAGATATTGTAGTTATTTGGATGTAT	UCR	-		ASMM10UP607V4	88453656	88453334	lncRNA	exon sense-overlapping	ENSMUST00000174282	Syncrip		-	88452689	88482196	20.944	156.603	4.43927	7.07577	25.6791	23.2815	9.00029	21.8919	24.867	132.844	149.898	174.309	169.705	156.259	4.75699	4.5105	3.3072	4.73855	4.8831	7.14003
ENSMUST00000223617	0.00435133	0.0252592	6.15992	down	No	chr13	expressed sequence AI197445 [Source:MGI Symbol;Acc:MGI:2145191]	ENSMUSG00000114780	AI197445		Reliable	chr13:107469822-107482718:+		242	CCCTTCTCCTACTTCCCTGGTAAGAAGCGAGCCCGCCCACGCACGTGTAACCAGTTGCAG	GENCODE	+		ASMM10LNC1A110681645V4	107482718	107469822	lncRNA	intergenic							180.921	2228.77	7.58443	10.2073	126.695	133.504	109.905	204.722	329.777	481.966	382.932	4546.32	4074.06	1658.56	7.12936	7.07427	7.18782	7.96974	8.56098	8.94875
ENSMUST00000213980	0.000177784	0.00409121	6.14018	down	No	chr9	septin 7 [Source:MGI Symbol;Acc:MGI:1335094]	ENSMUSG00000001833	Sept7	Yes	Reliable	chr9:25252649-25290802:+		1727	GCTGTTTTATCCTTTTAATATTGATTGCCACTTTAAACAAAGATCACTCAATGAGTTTCA	GENCODE	+	Pseudopodium	ASMM10LNC1A100048059V4	25290802	25252649	lncRNA	exon sense-overlapping	NM_001359738	Sept7		+	25252892	25308571	8.46328	61.5955	3.08614	5.70443	9.04323	5	5	10.972	12.3011	59.8043	71.3415	63.8494	72.0109	40.9713	3.17769	2.33065	2.33871	3.74467	3.839	6.03766
ENSMUST00000166866	2.35433e-06	0.00046555	6.12233	down	No	chr3	insulin receptor-related receptor [Source:MGI Symbol;Acc:MGI:1346037]	ENSMUSG00000005640	Insrr		Reliable	chr3:87801943-87802808:+		376	AGCAATCCTGGTGGACAAGTGTGTCCCTGCCCCCGAGGGATGGCCTGCACAGCAGGCGGT	GENCODE	+		ASMM10LNC1A118223361V4	87802808	87801943	lncRNA	bidirectional	ENSMUST00000107582	Insrr		+	87797094	87816052	85.9602	761.918	6.61954	9.23362	94.2524	96.3967	96.7583	62.8071	79.5864	533.837	739.954	958.897	1108.26	468.643	6.68894	6.62233	6.99383	6.25258	6.54002	9.09571
AK020551	3.85705e-05	0.00200796	5.98079	down	Yes	chr13		AK020551	AK020551			chr13:12736530-12737484:+		955	CCAGGTATGTATTAGGAAATCACTTCTTACATGTTTGCTGAATTTTGGGTGCTGAATAAA	Genbank	+		ASMM10P052370V4	12737484	12736530	lncRNA	intergenic							7.79204	51.7497	2.90313	5.48346	6.02809	14.077	5	8.85514	5	49.4115	43.6975	60.9967	59.349	45.294	2.62245	3.76412	2.33871	3.44578	2.34458	5.78024
humanlincRNA2183+	1.33122e-06	0.000350985	5.84857	down	No	chr16		humanlincRNA2183	humanlincRNA2183			chr16:15367846-15391172:+		23326	TTTGTTCAGAGTCCTGTTGTTCTTCTGCATAAGAGCCTAGCTTCACCCCCATTACATGGA	lincRNA	+		humanlincRNA2183+_P1V4	15391172	15367846	lncRNA	intergenic							91.5911	757.964	6.6996	9.24768	100.739	83.7188	85.7577	67.8919	119.848	423.959	744.03	858.365	1055.89	707.571	6.78803	6.42489	6.81176	6.36274	7.11057	8.76443
ENSMUST00000151032	0.00017344	0.00403869	5.83368	down	Yes	chr11	RIKEN cDNA 1700042O10 gene [Source:MGI Symbol;Acc:MGI:1920571]	ENSMUSG00000086391	1700042O10Rik		Gold	chr11:11868123-11885321:+	NR_045178	1075	TCCACTGTTGTCCTTTGGTAACCGAGAATAAGTGAATAAATAAATGAATGAATCCGTTCA	GENCODE	+		ASMM10LNC1A100004756V4	11885321	11868123	lncRNA	natural antisense	ENSMUST00000155690	Ddc		-	11846658	11890369	8.94206	62.3874	3.16907	5.71348	6.49174	9.28862	5	12.1911	11.7388	85.6919	53.8776	61.9318	66.5111	43.9247	2.70655	3.12793	2.33871	3.90328	3.7689	6.51961
ENSMUST00000199394	6.02826e-07	0.000211982	5.72436	down	No	chr5	splicing factor SWAP [Source:MGI Symbol;Acc:MGI:101760]	ENSMUSG00000029439	Sfswap		Reliable	chr5:129550778-129559499:+		426	AAGCACTCCCTGCCCAGTGCCTACCGGACAGTGCGGCGGTCAAGTATGTGCCTCCGACCG	GENCODE	+	Nucleus	ASMM10LNC1A113257662V4	129559499	129550778	lncRNA	exon sense-overlapping	ENSMUST00000053737	Sfswap		+	129501221	129571384	54.0777	431.656	5.94361	8.46072	62.7168	64.7104	50.6291	43.0886	49.2434	303.364	475.38	452.941	608.231	318.366	6.08572	6.03915	5.9983	5.72317	5.8717	8.30946
ENSMUST00000151537	0.000151881	0.00372979	5.69841	down	No	chr11	heterogeneous nuclear ribonucleoprotein H1 [Source:MGI Symbol;Acc:MGI:1891925]	ENSMUSG00000007850	Hnrnph1		Gold	chr11:50384963-50386225:+		677	GGTGATTTTGGTATTATAGTCTTACCCTACAAAATCCTTTTGCAGACCAAGTTTTACAGG	GENCODE	+	Nucleus	ASMM10LNC1A106718622V4	50386225	50384963	lncRNA	exon sense-overlapping	ENSMUST00000069304	Hnrnph1		+	50377719	50386527	13.6114	96.3604	3.82075	6.33131	15.3252	20.0193	7.43371	11.9802	13.2986	100.395	140.076	93.8313	67.1079	80.3923	3.97531	4.28311	3.01304	3.87596	3.95634	6.74487
ENSMUST00000034183	7.57722e-07	0.00024129	5.69194	down	Yes	chr8	colorectal neoplasia differentially expressed (non-protein coding) [Source:MGI Symbol;Acc:MGI:1918546]	ENSMUSG00000031736	Crnde		Reliable	chr8:92326038-92356120:-	NR_033641	1238	GTCACCTCTTTAAATCTTGATGCCGTGCCGTGAACCCCAGCTCTCCTACGGGAAGATGGG	GENCODE	-		ASMM10LNC1A109397010V4	92356120	92326038	lncRNA	intergenic							1229.31	9837.91	10.4928	13.0017	1210.21	1060.94	869.633	1355.04	1650.75	6184.68	9858.52	12435.7	13892	6818.64	10.4994	10.2421	10.3967	10.5551	10.7707	12.6439
ENSMUST00000144230	3.87351e-05	0.00201123	5.64118	down	Yes	chr11	predicted gene 11695 [Source:MGI Symbol;Acc:MGI:3649841]	ENSMUSG00000085651	Gm11695		Reliable	chr11:115462045-115463454:-		407	CAGCACCAACTTTCCTACCACCGGGAGATCAACCTGAGCTCACCACCAGCGAGCAAGCTG	GENCODE	-		ASMM10LNC1A100025987V4	115463454	115462045	lncRNA	natural antisense	ENSMUST00000092445	Slc16a5		+	115462478	115472921	35.9605	310.608	5.3349	7.8309	39.353	38.7064	27.7404	33.0697	40.9327	114.612	144.899	450.569	435.609	407.353	5.39399	5.26609	5.05979	5.34763	5.60701	6.92623
ENSMUST00000141870	4.34745e-06	0.000670437	5.56561	down	No	chr4	asparagine-linked glycosylation 6 (alpha-1,3,-glucosyltransferase) [Source:MGI Symbol;Acc:MGI:2444031]	ENSMUSG00000073792	Alg6		Reliable	chr4:99715676-99746384:+		378	ACCAGTCAAACAGTGGATAAAGTCGCTAATATTTGGTGCAGCGTTAATGTCTTTCTGAAG	GENCODE	+	Nucleus	ASMM10LNC1A105121729V4	99746384	99715676	lncRNA	exon sense-overlapping	ENSMUST00000107004	Alg6		+	99715676	99752885	5.10101	33.2992	2.38189	4.85843	5.50507	5	5	5	5	34.4723	37.3067	36.8588	30.7415	27.1166	2.53646	2.33065	2.33871	2.35905	2.34458	5.29686
ENSMUST00000197054	8.97755e-06	0.00100516	5.54999	down	Yes	chr3	predicted gene 42949 [Source:MGI Symbol;Acc:MGI:5663086]	ENSMUSG00000105401	Gm42949		Gold	chr3:151333349-151337638:+		2202	CCTCGTCCCTAGAAAGATTTTGTTCCACGGGAATATAAAATATAGAAAATTCAGAAACCG	GENCODE	+		ASMM10LNC1A100111482V4	151337638	151333349	lncRNA	intergenic							20.897	151.633	4.48597	6.95846	16.7756	18.2134	14.7652	27.2131	27.5177	104.823	98.5781	208.859	209.168	136.738	4.11808	4.1398	4.08549	5.0621	5.0244	6.80117
ENSMUST00000188120	0.000147611	0.00370462	5.51221	down	No	chr9	testis expressed gene 264 [Source:MGI Symbol;Acc:MGI:1096570]	ENSMUSG00000040813	Tex264		Reliable	chr9:106662390-106685909:-		436	GTGGGGCCGCCGCTGAGGTGCCTCCTGAGAAGTGCCGCTGTGCAGTCGGCAGCATCCTGA	GENCODE	-		ASMM10LNC1A116832624V4	106685909	106662390	lncRNA	exon sense-overlapping	uc009rkm.1	Tex264		-	106658746	106685934	31.3575	253.183	5.14458	7.60721	31.129	34.9885	27.2799	31.4547	31.9356	165.591	423.898	260.759	299.009	116.659	5.04408	5.12432	5.03361	5.27706	5.24383	7.44638
ENSMUST00000221765	3.81953e-05	0.00200117	5.50619	down	Yes	chr13	predicted gene, 35161 [Source:MGI Symbol;Acc:MGI:5594320]	ENSMUSG00000113121	Gm35161		Reliable	chr13:68998793-69031474:+		941	ACAGAGGTGGACACGTGCCAGCCAACACAGGAATACAGGTTCTTCTTGTGCATCCTGGGA	GENCODE	+		ASMM10LNC1A102157685V4	69031474	68998793	lncRNA	natural antisense	ENSMUST00000022013	Adcy2		-	68620043	68999541	6.9623	49.0351	2.85146	5.31251	7.60265	5.24547	9.2908	5	7.6726	19.627	52.1234	52.7068	72.2941	48.4241	2.92252	2.47078	3.35815	2.35905	3.14679	4.53354
uc.75-	4.82495e-05	0.0021765	5.48859	down	Yes	chr2		uc.75	uc.75			chr2:44987394-44987630:-		236	GACGTTGATCATTTGGGCAAATTTTACGTAAAGAGAAGAGCATTTATTGTGTTTTGGAAC	UCR	-		ASMM10UP482V4	44987630	44987394	lncRNA	exon sense-overlapping	ENSMUST00000176732	Zeb2		-	44987121	45112985	498.489	3535.41	9.0662	11.5226	523.56	379.527	227.611	628.112	733.637	3589.11	4008.11	3595.75	3701.27	2782.79	9.24474	8.59362	8.32246	9.51492	9.65526	11.8146
ENSMUST00000196117	0.000393104	0.00622668	5.47264	down	Yes	chr3	predicted gene 42701 [Source:MGI Symbol;Acc:MGI:5662838]	ENSMUSG00000104583	Gm42701		Reliable	chr3:104144199-104145855:-		1657	TTGGACCTAGTTGAATAGACTTTCTGAGCCTCGATGAATAAGGAGAGAAATCAACACAGG	GENCODE	-		ASMM10LNC1A100058315V4	104145855	104144199	lncRNA	intron sense-overlapping	ENSMUST00000064371	Magi3		-	104013259	104220374	25.7364	170.806	4.7014	7.15364	22.2005	15.1031	15.7561	47.3672	28.2548	169.622	186.197	182.48	214.313	101.419	4.54313	3.86764	4.1773	5.85423	5.06469	7.48395
AK160305	0.000225344	0.00462165	5.47041	down	Yes	chr1		AK160305	AK160305			chr1:130722811-130724353:+		1545	CTTCTGTAATGTGATTGTTCTGTAATGTGATCTCTAAAGAGTCGATTCATCAAACCTTTC	Genbank	+		ASMM10P020833V4	130724353	130722811	lncRNA	bidirectional	ENSMUST00000189534	Pfkfb2		-	130690278	130729253	57.4252	384.92	5.87649	8.32813	46.8132	51.9358	23.5779	78.0588	86.7404	404.788	414.882	447.481	378.148	279.301	5.65628	5.70928	4.79925	6.55849	6.65913	8.70471
ENSMUST00000130380	1.67224e-05	0.00137297	5.34589	down	No	chr2	serine/threonine kinase 39 [Source:MGI Symbol;Acc:MGI:1858416]	ENSMUSG00000027030	Stk39		Reliable	chr2:68211740-68223326:-		452	CCCTGCCCAGCAGTTCCTTCTCCGCCCGCTCACGTTCCAGTGGCTGCTAATTTACAGAAG	GENCODE	-		ASMM10LNC1A101321457V4	68223326	68211740	lncRNA	exon sense-overlapping	uc029txy.1	Stk39		-	68210447	68386688	592.533	5012.75	9.4271	11.8455	522.816	567.837	463.526	577.716	830.771	2525.77	3913.46	7718.95	8183.16	2722.43	9.24075	9.25889	9.39983	9.4009	9.83514	11.2967
ENSMUST00000133169	1.41547e-06	0.000369227	5.33533	down	No	chr4	sex comb on midleg homolog 1 [Source:MGI Symbol;Acc:MGI:1352762]	ENSMUSG00000000085	Scmh1	Yes	Reliable	chr4:120529155-120530186:+		443	TTTGGCTCACTGAGCAAAAGCTCCCTGCCCTGGTCAGAATTGCTGCAAAAGATGGGGCCT	GENCODE	+		ASMM10LNC1A113843926V4	120530186	120529155	lncRNA	exon sense-overlapping	NM_001355423	Scmh1		+	120453244	120530199	326.495	2639.46	8.58856	11.0041	368.482	377.022	332.793	263.529	290.65	1696.75	2281.27	3576.22	3907.32	1735.74	8.74091	8.57812	8.90862	8.33536	8.37977	10.7325
ENSMUST00000139339	4.77988e-06	0.00069869	5.27484	down	No	chr12	synaptophysin-like protein [Source:MGI Symbol;Acc:MGI:108081]	ENSMUSG00000020570	Sypl	Yes	Reliable	chr12:32965406-32969446:+		569	ACCTCTACCGGGATAGTCGCAAACTGCCCATGATCGGTCTCATAGCACAGTCTGGCCTGC	GENCODE	+	Nucleus;Exosome	ASMM10LNC1A108731712V4	32969446	32965406	lncRNA	exon sense-overlapping	ENSMUST00000076698	Sypl		+	32953891	32979860	125.67	895.422	7.1447	9.54383	147.89	133.623	80.7938	126.282	139.761	1005.74	983.812	876.073	847.223	764.256	7.36689	7.07551	6.71903	7.24675	7.31531	10.0039
AK005652	2.6929e-06	0.000506482	5.25361	down	Yes	chr3		AK005652	AK005652			chr3:8462428-8463102:+		675	TCGCCCGGCCCGCCCGCTCCCTTACCAGTTTATAACTTCTATGAATATTCCCATTTAAAG	Genbank	+		ASMM10P025604V4	8463102	8462428	lncRNA	intergenic							722.969	5470.8	9.71559	12.1089	621.629	771.055	505.661	711.009	1005.49	4727.45	5479.38	6631.79	7343.71	3171.69	9.50845	9.73825	9.54328	9.68114	10.1068	12.2415
ENSMUST00000145320	2.30075e-05	0.00156273	5.20023	down	No	chr18	establishment of sister chromatid cohesion N-acetyltransferase 1 [Source:MGI Symbol;Acc:MGI:1925055]	ENSMUSG00000024293	Esco1		Gold	chr18:10566630-10610109:-		2249	TTTTGTCAAAGCAGACAGAATTTCAGCATATGTTCAGCATCTGAGGTGGAGACTAATCCA	GENCODE	-		ASMM10LNC1A102283277V4	10610109	10566630	lncRNA	exon sense-overlapping	ENSMUST00000115864	Esco1		-	10566619	10610109	7.47196	46.3501	2.95476	5.33333	8.80669	7.83401	5	8.86508	6.85405	51.5489	46.9314	46.4356	39.8309	47.0039	3.14112	2.88111	2.33871	3.44685	2.96597	5.8368
humanlincRNA0183-	1.30597e-06	0.00034807	5.17654	down	Yes	chr1		humanlincRNA0183	humanlincRNA0183			chr1:179939936-179945611:-		5675	AATAGTGTCACTCCCACGGGGCTCATTGTGAAATTCACTGAGAAATCACAGATCTGTGGT	lincRNA	-		humanlincRNA0183-_P1V4	179945611	179939936	lncRNA	intergenic							32.1009	220.64	5.15705	7.52903	28.937	31.4233	29.4011	26.9012	43.8419	142.639	214.303	244.154	304.561	197.543	4.93163	4.95682	5.1495	5.04389	5.70339	7.24363
ENSMUST00000172962	4.06135e-06	0.000644885	5.17031	down	No	chr12	integrin beta 1 binding protein 1 [Source:MGI Symbol;Acc:MGI:1306802]	ENSMUSG00000062352	Itgb1bp1		Reliable	chr12:21240825-21247323:-		448	TTGTGTCCCCGTCTCTACATCACCACCAGGCACACCATCCCAAGCCCTCCTGAGGTGAAG	GENCODE	-		ASMM10LNC1A107603933V4	21247323	21240825	lncRNA	natural antisense	ENSMUST00000090834	Asap2		+	21111756	21270171	513.662	3842.05	9.20083	11.5711	404.248	527.134	383.665	456.871	796.395	2043	3530.66	4784.09	5198.02	3654.46	8.88127	9.14148	9.11843	9.08115	9.78182	10.9877
ENSMUST00000125227	1.53149e-05	0.00134115	5.1676	down	No	chr2	MAP-kinase activating death domain [Source:MGI Symbol;Acc:MGI:2444672]	ENSMUSG00000040687	Madd		Reliable	chr2:91137361-91183818:-		5480	AGTTCCGGAGAGACCCTTGGAGCTGACAGTGACCTGAGCAGCAATGCAGGGTAAAGCCCA	GENCODE	-		ASMM10LNC1A116965016V4	91183818	91137361	lncRNA	exon sense-overlapping	ENSMUST00000111369	Madd		-	91137360	91179326	8.51717	52.245	3.08015	5.44964	10.4772	10.7788	5.90961	5	10.4202	29.3626	40.3913	64.9777	71.1116	55.3819	3.40225	3.35732	2.68363	2.35905	3.59848	5.08088
ENSMUST00000178064	4.1989e-07	0.000193514	5.12099	down	No	chr8	colorectal neoplasia differentially expressed (non-protein coding) [Source:MGI Symbol;Acc:MGI:1918546]	ENSMUSG00000031736	Crnde		Reliable	chr8:92326033-92346870:-		818	TCCACATCCATGTAGAAATCTTGATGCCGTGCCGTGAACCCCAGCTCTCCTACGGGAAGA	GENCODE	-		ASMM10LNC1A100913357V4	92346870	92326033	lncRNA	intergenic							1482.56	10437.8	10.7569	13.1133	1510.43	1272.01	1005.65	1678.91	1945.81	6896.27	10386.3	12710.5	14427.2	7768.58	10.8273	10.524	10.6266	10.8295	10.9771	12.8128
ENSMUST00000132146	0.000796544	0.00918686	5.06504	down	No	chr11	VPS54 GARP complex subunit [Source:MGI Symbol;Acc:MGI:2178798]	ENSMUSG00000020128	Vps54	Yes	Reliable	chr11:21277903-21292231:+		493	TCTATGGTGAAGAAATGATTATTACAGCAAAGAACATCATTAAAGAGGTATTGTGCATTT	GENCODE	+		ASMM10LNC1A110752012V4	21292231	21277903	lncRNA	exon sense-overlapping	ENSMUST00000132017	Vps54		+	21268785	21320324	14.8607	85.5535	3.84166	6.18224	18.2184	12.1636	5	20.2475	18.6741	79.1862	82.4099	100.693	102.367	63.1107	4.24166	3.53843	2.33871	4.62475	4.46478	6.41476
ENSMUST00000132146	0.000796544	0.00918686	5.06504	down	No	chr11	VPS54 GARP complex subunit [Source:MGI Symbol;Acc:MGI:2178798]	ENSMUSG00000020128	Vps54	Yes	Reliable	chr11:21277903-21292231:+		493	TCTATGGTGAAGAAATGATTATTACAGCAAAGAACATCATTAAAGAGGTATTGTGCATTT	GENCODE	+		ASMM10LNC1A110752012V4	21292231	21277903	lncRNA	exon sense-overlapping	ENSMUST00000006221	Vps54		+	21239281	21321136	14.8607	85.5535	3.84166	6.18224	18.2184	12.1636	5	20.2475	18.6741	79.1862	82.4099	100.693	102.367	63.1107	4.24166	3.53843	2.33871	4.62475	4.46478	6.41476
ENSMUST00000132146	0.000796544	0.00918686	5.06504	down	No	chr11	VPS54 GARP complex subunit [Source:MGI Symbol;Acc:MGI:2178798]	ENSMUSG00000020128	Vps54	Yes	Reliable	chr11:21277903-21292231:+		493	TCTATGGTGAAGAAATGATTATTACAGCAAAGAACATCATTAAAGAGGTATTGTGCATTT	GENCODE	+		ASMM10LNC1A110752012V4	21292231	21277903	lncRNA	exon sense-overlapping	ENSMUST00000109578	Vps54		+	21239281	21321122	14.8607	85.5535	3.84166	6.18224	18.2184	12.1636	5	20.2475	18.6741	79.1862	82.4099	100.693	102.367	63.1107	4.24166	3.53843	2.33871	4.62475	4.46478	6.41476
ENSMUST00000142672	2.45389e-07	0.000136748	5.04206	down	No	chr18	SMAD family member 4 [Source:MGI Symbol;Acc:MGI:894293]	ENSMUSG00000024515	Smad4	Yes	Reliable	chr18:73640223-73662775:-		917	TGCTCCATTGCTTACTTTGAAATGGACGTTCAGAGTTACTACCTGGACAGAGAAGCTGGC	GENCODE	-	Exosome	ASMM10LNC1A109299369V4	73662775	73640223	lncRNA	exon sense-overlapping	NM_001364968	Smad4		-	73634791	73703791	5	28.9309	2.34112	4.67513	5	5	5	5	5	26.1068	27.8476	28.5295	29.0147	33.1561	2.33259	2.33065	2.33871	2.35905	2.34458	4.92527
ENSMUST00000154028	1.25213e-05	0.00121353	5.0262	down	No	chr2	MAP-kinase activating death domain [Source:MGI Symbol;Acc:MGI:2444672]	ENSMUSG00000040687	Madd		Reliable	chr2:91137361-91183818:-		5608	TGTCATCGGTGTGAGTAATAGTTCCGGAGAGACCCTTGGAGCTGACAGTGACCTGAGCAG	GENCODE	-		ASMM10LNC1A112017475V4	91183818	91137361	lncRNA	exon sense-overlapping	ENSMUST00000075269	Madd		-	91137360	91183818	19.6837	128.016	4.38045	6.70992	27.39	23.114	12.9067	12.3681	22.6395	67.5116	89.1385	165.589	167.837	150.003	4.85142	4.50061	3.8804	3.92477	4.74506	6.20017
ENSMUST00000210900	6.03039e-05	0.00238878	4.9952	down	Yes	chr8	predicted gene, 34623 [Source:MGI Symbol;Acc:MGI:5593782]	ENSMUSG00000109966	Gm34623		Reliable	chr8:60195802-60280346:+		977	TTTCAGTACCCTGCCATGTATAAGATACCTCCCCCAAATAAAATAGCTGGTGTGACATGT	GENCODE	+		ASMM10LNC1A100116874V4	60280346	60195802	lncRNA	intergenic							71.5311	560.03	6.36554	8.68608	71.5531	74.8456	76.8915	64.0773	70.2878	279.665	469.39	822.89	958.172	270.035	6.27595	6.25857	6.64202	6.28347	6.36769	8.19107
[truncated: 4 more columns]
