# Supplementary material for: Identification of candidate long non-coding RNAs and mRNAs associated with heart aging in mice
Source: PeerJ. 2025 Dec 2;13:e20433. doi: 10.7717/peerj.20433 (PMC12679924; doi:10.7717/peerj.20433)
Supplement: Supplemental Information 3 [file peerj-13-20433-s003.xlsx]

## Sheet: Sheet1
Extended table S2. top 100 differentially expressed mRNAs in mice hearts(20m vs. 3m)
Transcript_ID	P-value*	FDR	Fold Change	Regulation	Canonical	chrom	description	GeneID	GeneSymbol	Locus	refseqID	RNAlength	Sequence	source	strand	Subcellular_Localization
ENSMUST00000233430	1.2889e-06	0.000342069	10.6944	down	Yes	chr17	male enhanced antigen 1 [Source:MGI Symbol;Acc:MGI:96957]	ENSMUSG00000002768	Mea1	chr17:46680986-46683102:+	NM_001277309	945	GAAGTGAAGGTGCGGGTCCGGCTGTGGGCTCTGAGAGGCCCCTGCCCGGATGGCAGCAGT	GENCODE	+	Cytoplasm
ENSMUST00000220377	2.94998e-07	0.000189706	7.20498	down	Yes	chr10	ubiquitin specific peptidase 15 [Source:MGI Symbol;Acc:MGI:101857]	ENSMUSG00000020124	Usp15	chr10:123105006-123196995:-	NM_027604	11525	TTGACGGCCTTATTTAGTCTTTTATTTCTTACTCTGAAACCACTGAAGTAAATCCAGTTT	GENCODE	-	Nucleus
ENSMUST00000218843	1.38655e-06	0.00035277	8.25563	down	Yes	chr10	keratin associated protein 10-10 [Source:MGI Symbol;Acc:MGI:3645300]	ENSMUSG00000112223	Krtap10-10	chr10:77835947-77837252:+	NM_001024709	1306	CCCTTCCCTGTCCTCACCGCCCTCTACTCAGTATCTTGTGAAATAAAACGAGATTCTCAG	GENCODE	+
ENSMUST00000203586	0.00033627	0.00543756	5.89502	up	Yes	chrX	spindlin family, member 2G [Source:MGI Symbol;Acc:MGI:5434937]	ENSMUSG00000095659	Spin2g	chrX:34237049-34238733:-		1016	TGTCACTCACTTGGAGAAAGAGTTCTAATTATTTATCACGGCATTGTCACAAATGTAGAA	GENCODE	-
ENSMUST00000201352	0.00048753	0.00652526	8.87912	up	No	chr5	BRISC and BRCA1 A complex member 2 [Source:MGI Symbol;Acc:MGI:1333875]	ENSMUSG00000052139	Babam2	chr5:31697684-32084962:+	NM_144541	1888	CTCCCAAATGCCCGAAATCTCTCCGGCCTTTGGCTAGTCCTGATCCCTCTGGGACCGGTG	GENCODE	+	Cytoplasm
ENSMUST00000200299	0.00543161	0.0263695	5.35752	up	Yes	chr5	unc-51 like kinase 1 [Source:MGI Symbol;Acc:MGI:1270126]	ENSMUSG00000029512	Ulk1	chr5:110786094-110810053:-		3581	TCTCCCCAAGCCACCCTTTTCCTACCAGTGGGAACCATCCCAGAGCGACCCAGCTGGAGC	GENCODE	-
ENSMUST00000195015	5.60196e-06	0.00067873	7.00519	down	Yes	chr1	transmembrane and coiled-coil domains 1 [Source:MGI Symbol;Acc:MGI:1921173]	ENSMUSG00000052428	Tmco1	chr1:167308378-167330785:+	NM_001039483	1573	TGAAGTCCAGCCACCGTGTGACAGGGTTCTAGTGTGAGGTAGGCGATCGGGCTCGGAGAG	GENCODE	+	Nucleus
ENSMUST00000194367	1.45824e-05	0.00112879	4.99782	up	Yes	chr3	predicted gene 5150 [Source:MGI Symbol;Acc:MGI:3779469]	ENSMUSG00000078780	Gm5150	chr3:15946870-16006437:-		1212	TGCTGTCATTGTCATTTACATACACAAGATGCAAAATGCCTAAATGAGCATAGCATGGAA	GENCODE	-
ENSMUST00000184744	4.28255e-05	0.00194957	4.72851	down	Yes	chr14	potassium channel tetramerisation domain containing 12 [Source:MGI Symbol;Acc:MGI:2145823]	ENSMUSG00000098557	Kctd12	chr14:102976581-102982637:-	NM_177715	6057	TTTTAGCCCCAATTGTCTTCTTTTTCAAAGCAGAATCATATGTGTGTATACCTGCTGCTT	GENCODE	-
ENSMUST00000179873	4.94002e-05	0.00206019	5.48044	down	Yes	chr6	electron transfer flavoprotein beta subunit lysine methyltransferase [Source:MGI Symbol;Acc:MGI:2443575]	ENSMUSG00000039958	Etfbkmt	chr6:149141513-149151166:+	NM_001252096	1576	CCTGCACGTGAAGGGCGAGTTCCACTTGCTGATCGAATAAAGTCAGTATTGTTTCTTTGT	GENCODE	+
ENSMUST00000179074	1.15939e-06	0.000334224	10.767	down	Yes	chr17	solute carrier family 30 (zinc transporter), member 6 [Source:MGI Symbol;Acc:MGI:2386741]	ENSMUSG00000024069	Slc30a6	chr17:74395621-74424009:+	NM_001252478	1938	GCATTAACTGCCTATACTTACCTCACCATCTTTGATCTCTTTAGTTTGTTTTTCTTTAGT	GENCODE	+	Nucleus
ENSMUST00000176250	2.39975e-05	0.00147991	4.70445	down	No	chr9	neuroplastin [Source:MGI Symbol;Acc:MGI:108077]	ENSMUSG00000032336	Nptn	chr9:58629106-58655208:+		4531	TCAAAGTCTATACTCCACGGTTATGTTGCTAAGCTATAATGTTCCAGAGGTAGGTGGTTT	GENCODE	+	Nucleus
ENSMUST00000170243	0.00103293	0.00967535	7.77308	down	Yes	chr18	polypeptide N-acetylgalactosaminyltransferase 1 [Source:MGI Symbol;Acc:MGI:894693]	ENSMUSG00000000420	Galnt1	chr18:24205767-24286810:+	NM_001160404	4108	CGCGCGGGCCGAGATGATTTGAGACATGTGGATTTGTGATATGAATTCATTTGGAAAGCC	GENCODE	+
ENSMUST00000168419	9.13789e-07	0.000299579	5.73637	down	Yes	chr18	CNDP dipeptidase 2 (metallopeptidase M20 family) [Source:MGI Symbol;Acc:MGI:1913304]	ENSMUSG00000024644	Cndp2	chr18:84667470-84681996:-	NM_001289531	2088	AGCAGGTCTGACCCCATTGCTCTCTCTACTCAGAGTTTCCCCGGTCTGAAGTCAGCCTGA	GENCODE	-	Cytoplasm
ENSMUST00000163643	2.92593e-06	0.000482883	6.29357	down	Yes	chr8	epidermal growth factor receptor pathway substrate 15-like 1 [Source:MGI Symbol;Acc:MGI:104582]	ENSMUSG00000006276	Eps15l1	chr8:72340999-72421460:-	NM_007944	3129	CCTCCGGCTTTGCCGACTTCACCTCTTTTGGCAATGAGGAGCAGCAATTGGCTTGGGCCA	GENCODE	-
ENSMUST00000163492	3.58037e-05	0.00181957	6.64551	down	No	chr17	solute carrier family 29 (nucleoside transporters), member 1 [Source:MGI Symbol;Acc:MGI:1927073]	ENSMUSG00000023942	Slc29a1	chr17:45585200-45592575:-	NM_022880	2216	GTGGTCCTGAGTCTGCAGAGGCTTCCCTTGCCTACTCTGTGTCCAGCTCTACCCCCCCCC	GENCODE	-
ENSMUST00000163281	4.87371e-05	0.00205858	14.1952	down	Yes	chr4	selection and upkeep of intraepithelial T cells 7 [Source:MGI Symbol;Acc:MGI:3041190]	ENSMUSG00000049214	Skint7	chr4:111972927-111988223:+	NM_001142775	1423	TTCTTTGCAATATATTTACCTCACCGCAGCAGAGTCTCTCTTTCAGATCCTCAGTTTCCC	GENCODE	+
ENSMUST00000163017	0.000539251	0.00680988	11.9113	up	Yes	chr10	vestigial like family member 2 [Source:MGI Symbol;Acc:MGI:2447460]	ENSMUSG00000049641	Vgll2	chr10:52022502-52028471:+	NM_153786	1650	TTATGTCCAGCGGTTGCCTATTGGTTATATTGGGTTAAATAAAATGCACTATTAAAATGC	GENCODE	+	Cytoplasm
ENSMUST00000155329	0.00208152	0.0146129	6.40961	up	Yes	chr18	ankyrin repeat and KH domain containing 1 [Source:MGI Symbol;Acc:MGI:1921733]	ENSMUSG00000024483	Ankhd1	chr18:36560611-36658908:+	NM_175375	8223	TCTCCCCACCCTTGGACAAGCGCCTCAAACACATGTGACTCTCCTATTCCATCTGTTTCT	GENCODE	+	Nucleus
ENSMUST00000151224	1.76564e-06	0.000383397	7.76629	down	Yes	chr2	family with sequence similarity 163, member B [Source:MGI Symbol;Acc:MGI:1926106]	ENSMUSG00000009216	Fam163b	chr2:27110380-27142491:-	NM_175427	2959	CTTCAAAGTGAATTAAGCATCTGTCCCTGCCACTCAACACCACCATGGGACTTGCCAGGG	GENCODE	-
ENSMUST00000134794	0.00177945	0.0134814	5.71087	down	Yes	chr2	phosphotriesterase related [Source:MGI Symbol;Acc:MGI:107372]	ENSMUSG00000026730	Pter	chr2:12924092-13003455:+	NM_001305437	3571	ACAAAGGCCACAATTTAATTAATTCATGTTATAATGCAAAGAAAAAGAGAAATGCTTGCC	GENCODE	+
ENSMUST00000126214	6.71804e-06	0.000729745	5.4565	down	Yes	chr6	coiled-coil serine rich 1 [Source:MGI Symbol;Acc:MGI:3045354]	ENSMUSG00000039578	Ccser1	chr6:61180324-62382865:+	NM_183310	5657	GCGCGCCCCGCCCGCTCCCATCCTCGCTCAGAATGACTGACTGCGAAGCTCTGGCGGAGC	GENCODE	+
ENSMUST00000122358	8.72246e-07	0.000294453	6.66251	down	Yes	chr14	transmembrane 9 superfamily member 1 [Source:MGI Symbol;Acc:MGI:1921390]	ENSMUSG00000002320	Tm9sf1	chr14:55635965-55643806:-	NM_028780	2517	AGGTCCCCGTCGGCGAAGGCGGAAGTGGTAAGACTGACGTGTCCGGGCTGCGGTGCTGCT	GENCODE	-
ENSMUST00000120847	0.0227386	0.0666064	4.92757	down	Yes	chr5	leucine rich repeat containing 8D [Source:MGI Symbol;Acc:MGI:1922368]	ENSMUSG00000046079	Lrrc8d	chr5:105700789-105815210:+	NM_178701	3929	GAAGGAGAACTGCTTCGGGTCGAGGGGAGGAGAGGAAGTGCACTGCTGACTGCAACGTGC	GENCODE	+
ENSMUST00000118522	0.000174309	0.00381575	4.83508	down	Yes	chr16	PAX3 and PAX7 binding protein 1 [Source:MGI Symbol;Acc:MGI:1914617]	ENSMUSG00000022974	Paxbp1	chr16:91014037-91044543:-	NM_026110	3973	AGCCATTCAAATAAAGCTTTGATGGCACCAAATCTTGATTCCTTTGGACGTGATCGGGCA	GENCODE	-	Nucleus
ENSMUST00000115797	9.56517e-05	0.00286062	7.5145	down	Yes	chr17	AT rich interactive domain 1B (SWI-like) [Source:MGI Symbol;Acc:MGI:1926129]	ENSMUSG00000069729	Arid1b	chr17:4995074-5347656:+	NM_001085355	11325	TGGCAAAAAGTGCTAAGATAGAAAAATGTCACCACACTGGGTCAAAAACGTGAAAGGAAA	GENCODE	+
ENSMUST00000114858	4.8586e-05	0.00205858	6.95176	up	Yes	chr16	predicted gene 5483 [Source:MGI Symbol;Acc:MGI:3645124]	ENSMUSG00000079597	Gm5483	chr16:36184212-36188111:+	NM_001082547	414	CAGCAAATTCTAAAGTGACCTGATTCTTCTTGTAAACAAATTTAGCCTTCAATAAAGAAA	GENCODE	+
ENSMUST00000114517	0.000983012	0.00940272	4.7411	up	Yes	chrX	spindlin family, member 2D [Source:MGI Symbol;Acc:MGI:1922101]	ENSMUSG00000079566	Spin2d	chrX:73175302-73176989:-	NM_001243002	1015	GGAGAAAGAGTTGTAATTATTTATCACGGCATTGTCACAACTGTAGAAATAAAGTTAATT	GENCODE	-
ENSMUST00000113973	7.68763e-05	0.00258344	5.15683	down	Yes	chr19	lysine methyltransferase 5B [Source:MGI Symbol;Acc:MGI:2444557]	ENSMUSG00000045098	Kmt5b	chr19:3767421-3818302:+	NM_001167885	6130	AGGAGATTATAAATAATAGTGTAAGCACTGCATCAGTGGACGTCTTGGCTTATGTTAGTT	GENCODE	+
ENSMUST00000113769	5.31238e-06	0.000660646	6.5525	down	Yes	chrX	arrestin 3, retinal [Source:MGI Symbol;Acc:MGI:2159617]	ENSMUSG00000060890	Arr3	chrX:100605497-100618493:+	NM_133205	1359	AGGAGTTCACAGAGACAGTAGCTGCTAACTCCAGCTTCTCCCAGACCTTTGCAGTAACCC	GENCODE	+
ENSMUST00000113298	0.00176731	0.0134171	4.88304	up	Yes	chr19	solute carrier family 22. member 29 [Source:MGI Symbol;Acc:MGI:3605624]	ENSMUSG00000075044	Slc22a29	chr19:8160165-8218899:-	NM_172776	2271	CTCCCAACCACACTAAGGGCAACAGCTCTAGGAGTCATTGGATTCTTTGGTAATAGTGGA	GENCODE	-
ENSMUST00000112589	0.000798775	0.00839969	5.31407	up	Yes	chr2	predicted gene 11099 [Source:MGI Symbol;Acc:MGI:3779335]	ENSMUSG00000079353	Gm11099	chr2:58859434-58907618:+		117	TCTCCCAACATAAATGGTCTCAATTCCCCAAAAACGAGTTAAAGAGAACAGAAAAAAAAA	GENCODE	+
ENSMUST00000111117	7.40063e-05	0.00254606	4.79517	down	Yes	chr1	CDC42 binding protein kinase alpha [Source:MGI Symbol;Acc:MGI:2441841]	ENSMUSG00000026490	Cdc42bpa	chr1:179960585-180165603:+	NM_001359546	9161	ATGATGCAACTGGATTCGTTTCAGGATTATGTTGCACGAATTGAATTTTGAATGAAGGAG	GENCODE	+	Cytoplasm
ENSMUST00000109958	0.000214375	0.00424183	5.29547	up	Yes	chr12	serine (or cysteine) peptidase inhibitor, clade A, member 3I [Source:MGI Symbol;Acc:MGI:2182841]	ENSMUSG00000079014	Serpina3i	chr12:104263122-104269372:+	NM_001199940	2200	CCTGAGGAAGTGGAAGAACTCTCTGAAACCCAGTAGGATAAGTGAGCTCCACCTGCCTAA	GENCODE	+
ENSMUST00000109659	1.79042e-05	0.00126847	5.5732	down	No	chr11	dopa decarboxylase [Source:MGI Symbol;Acc:MGI:94876]	ENSMUSG00000020182	Ddc	chr11:11814103-11890408:-	NM_016672	1954	GTGCCTTTATCTGTCCTGAATTCCGGTATCTTCTGAATGGTGTGGAGTTTGCAGATTCCT	GENCODE	-
ENSMUST00000107974	3.115e-10	1.042e-06	39.4303	down	Yes	chr7	IgLON family member 5 [Source:MGI Symbol;Acc:MGI:2686277]	ENSMUSG00000013367	Iglon5	chr7:43472904-43490075:-	NM_001164518	2622	GGTCTACCTCATCGTCCATGTCCCTGCCCGTATTGTGAACATCTCCTCACCCGTGGCAGT	GENCODE	-
ENSMUST00000107762	5.74363e-06	0.000681089	4.66495	down	Yes	chr7	tubby-like protein 2 [Source:MGI Symbol;Acc:MGI:1861600]	ENSMUSG00000023467	Tulp2	chr7:45513706-45522594:+	NM_001045555	1883	TCCGCCTGCCCCAGTGCCCTGGGAGCATTACTCTGTTGGACATGGACCGTGAGGGGCCAA	GENCODE	+
ENSMUST00000107070	3.42754e-06	0.000516293	5.1543	down	Yes	chr3	PDZ domain containing 1 [Source:MGI Symbol;Acc:MGI:1928901]	ENSMUSG00000038298	Pdzk1	chr3:96832154-96870746:+	NM_001146001	2711	AGAGGCCAGAGCTTTGCAATAGGAACGATGACACCTTGCCTACCTGATCGCTGCTGAAGA	GENCODE	+
ENSMUST00000106899	0.000174584	0.00381575	6.45071	up	Yes	chr1	chemokine (C-X-C motif) receptor 2 [Source:MGI Symbol;Acc:MGI:105303]	ENSMUSG00000026180	Cxcr2	chr1:74153991-74161246:+	NM_009909	3046	CCAATGCAGAACTATCTACCTTATAATTTCTTGTAAAGTGTGACTATTAAATGTCGTTTT	GENCODE	+
ENSMUST00000106407	3.04979e-06	0.00048334	6.51026	down	Yes	chr7	rabaptin, RAB GTPase binding effector protein 2 [Source:MGI Symbol;Acc:MGI:1917564]	ENSMUSG00000030727	Rabep2	chr7:126429066-126445901:+	NM_030566	2234	ACGGAGCGGGTCCAGCAGGAGCAGCGCAAGGCCCAGCTCACGGATCTCCTCTCAGAGCAG	GENCODE	+
ENSMUST00000103194	0.00996412	0.0386006	5.00036	down	Yes	chr11	carbonic anhydrase 4 [Source:MGI Symbol;Acc:MGI:1096574]	ENSMUSG00000000805	Car4	chr11:84957788-84966044:+	NM_007607	1256	AGCCCCTGGTGGAAGCACTGCCCAGTATCTCCAAACCCCATTCAACCTCTACAGTGAGGG	GENCODE	+
ENSMUST00000102759	3.63905e-07	0.000203332	7.59971	down	Yes	chr2	signal transducing adaptor molecule (SH3 domain and ITAM motif) 2 [Source:MGI Symbol;Acc:MGI:1929100]	ENSMUSG00000055371	Stam2	chr2:52691664-52742200:-	NM_019667	4717	GAACTCGGTAACAGCACACACCGTCCAACCTCCATACTTAAGCACTGGACAGGACACTGT	GENCODE	-
ENSMUST00000096321	8.14843e-05	0.00263539	4.72828	down	Yes	chrX	armadillo repeat containing, X-linked 5 [Source:MGI Symbol;Acc:MGI:2148026]	ENSMUSG00000072969	Armcx5	chrX:135742733-135747322:+	NM_001009575	2779	GCTAAAGAGGTCTGTGTCAAATCCAGTGCTGGAGACAAAGCTAAAGAGGTCTGTGTCAAA	GENCODE	+	Nucleus
ENSMUST00000093506	7.93448e-05	0.00261666	6.20056	up	Yes	chr1	RIKEN cDNA C130026I21 gene [Source:MGI Symbol;Acc:MGI:3612702]	ENSMUSG00000052477	C130026I21Rik	chr1:85246344-85270543:-	NM_175219	1948	TCAGCTAGACTCTGAATCCTTATCTCTGGTACTGTTGTTCTCTGCTAAAATAAACTGTTA	GENCODE	-
ENSMUST00000092614	0.00217104	0.0149404	5.90594	up	Yes	chr6	polycomb group ring finger 1 [Source:MGI Symbol;Acc:MGI:1917087]	ENSMUSG00000069678	Pcgf1	chr6:83078390-83080847:+	NM_197992	866	CGTCTCCTCAGGGGGGCCAGATTGCGATCGCGATGAGGCTTCGGAACCAGCTCCAGTCAG	GENCODE	+
ENSMUST00000091459	0.00113657	0.0102224	4.82295	down	No	chr13	family with sequence similarity 172, member A [Source:MGI Symbol;Acc:MGI:1915925]	ENSMUSG00000064138	Fam172a	chr13:77708690-78166235:+	NM_001163419	3892	GCATTAGACATTAATTACTTGAAATTTTTAATTAGTGAAGGTTATATCCAGTGCATGGTG	GENCODE	+
ENSMUST00000090591	2.87291e-05	0.00165638	10.3867	up	No	chr14	interleukin 3 receptor, alpha chain [Source:MGI Symbol;Acc:MGI:96553]	ENSMUSG00000068758	Il3ra	chr14:14346275-14355490:+	NM_008369	1614	CTATCTCAGGAAGTTGCTCAATCTCGGGACCATGGGCGCGGTCGGGGCGGGGCGGGGCCT	GENCODE	+
ENSMUST00000090070	1.45962e-06	0.00035277	5.57971	down	Yes	chr6	GTPase, IMAP family member 4 [Source:MGI Symbol;Acc:MGI:1349656]	ENSMUSG00000054435	Gimap4	chr6:48684582-48692060:+	NM_174990	1804	TGCATTTCCCTTGATAACCCTGCCCTATAGTGCTCACCCCCCCCGATGCCCAAATGCTCT	GENCODE	+
ENSMUST00000087585	1.11577e-08	2.0729e-05	5.92532	up	Yes	chr1	boule homolog, RNA binding protein [Source:MGI Symbol;Acc:MGI:1922638]	ENSMUSG00000025977	Boll	chr1:55300069-55363319:-	NM_029267	882	TGGTCCAGCAATAAGAAAACAACAAGTAGGGATTCCTCGTTCTAGTCTCATGCCAGCGGC	GENCODE	-
ENSMUST00000086056	5.17903e-07	0.000211203	5.49701	down	Yes	chr5	piwi-like RNA-mediated gene silencing 1 [Source:MGI Symbol;Acc:MGI:1928897]	ENSMUSG00000029423	Piwil1	chr5:128736174-128755474:+	NM_021311	4016	AGCTCTGCCACGTGTACTATAATTGGCCTGGAGTCATCCGAGTCCCTGCACCTTGCCAGT	GENCODE	+
ENSMUST00000085745	4.82134e-07	0.000206699	5.12044	down	Yes	chr12	WD repeat domain 35 [Source:MGI Symbol;Acc:MGI:1921932]	ENSMUSG00000066643	Wdr35	chr12:8973892-9028847:+	NM_172470	4501	TTGAAGAACTGATCAACTTCACCCCACACCAATTACACAGCCGCCCCATCGCCCGCGCAG	GENCODE	+	Nucleus
ENSMUST00000085052	4.45833e-05	0.00199848	4.88027	up	Yes	chr12	serine (or cysteine) peptidase inhibitor, clade A, member 3B [Source:MGI Symbol;Acc:MGI:2182835]	ENSMUSG00000066364	Serpina3b	chr12:104127996-104139545:+	NM_173024	2070	TCAGGGCAGAGTAGTACCTTTTCTCTCAGTTCCCAGATGACCAGCCTCACAGGACAGCTG	GENCODE	+
ENSMUST00000084460	1.10567e-07	0.000115543	7.09425	up	Yes	chr7	CD163 molecule-like 1 [Source:MGI Symbol;Acc:MGI:2443796]	ENSMUSG00000025461	Cd163l1	chr7:140218267-140231145:+	NM_172909	3454	ATCAGCCCACAGAGAATGACGAGTAGAATAGGCACTCGGGAGTCTTTGCAGCTCAGTGCT	GENCODE	+
ENSMUST00000082085	0.00301615	0.0182231	5.15823	up	Yes	chr6	taste receptor, type 2, member 131 [Source:MGI Symbol;Acc:MGI:2681280]	ENSMUSG00000057699	Tas2r131	chr6:132956884-132957919:-	NM_207030	1036	TCTCCCTTCATAGATTCTCCAGTCTTTACTAGAGGAACAGCTTAACAGGGAGACTTGGAA	GENCODE	-
ENSMUST00000081946	1.366e-10	7.61e-07	16.481	down	Yes	chr7	translocase of inner mitochondrial membrane 50 [Source:MGI Symbol;Acc:MGI:1913775]	ENSMUSG00000003438	Timm50	chr7:28305516-28312072:-	NM_025616	1515	ATTACAGACAGATGATCATCGAGCCCACCAGTCCCTGCCTTCTCCCAGACCCTCTGCGGG	GENCODE	-
ENSMUST00000077354	1.65501e-07	0.000138359	7.39328	up	Yes	chr7	kallikrein 1-related pepidase b4 [Source:MGI Symbol;Acc:MGI:97320]	ENSMUSG00000066513	Klk1b4	chr7:44207435-44211754:+	NM_010915	839	ATAACCCCTGAGTGTCACATTGTCCCCTTTTCTCAATAAAGCCCACCATGCAGCAAATGA	GENCODE	+
ENSMUST00000073528	1.33133e-08	2.226e-05	13.0678	down	Yes	chr5	zygote arrest 1 [Source:MGI Symbol;Acc:MGI:2180337]	ENSMUSG00000063935	Zar1	chr5:72577114-72581254:-	NM_174877	1429	CATCACCTGTCAAAGTTGTAAAAGAACTAGATGTGCCTGCCCAGTCAGACTTCGCCACGT	GENCODE	-
ENSMUST00000073391	9.37628e-05	0.0028433	5.57676	down	Yes	chr19	cytochrome P450, family 26, subfamily c, polypeptide 1 [Source:MGI Symbol;Acc:MGI:2679699]	ENSMUSG00000062432	Cyp26c1	chr19:37685581-37693398:+	NM_001105201	1747	TAGCTGATGCGTACACACCGGCCAATCTTCAGAGCCCTAGGTCCTCATCGCGCGTATATT	GENCODE	+
ENSMUST00000073363	2.52296e-07	0.000168735	9.40378	up	Yes	chr5	amelotin [Source:MGI Symbol;Acc:MGI:1918671]	ENSMUSG00000029282	Amtn	chr5:88376108-88385916:+	NM_027793	1022	TAGTATGCCACTTCAGACAGACCTGGAAAATGTGTGTATTAAAATATATTTTGAAAACTG	GENCODE	+
ENSMUST00000073157	0.000527307	0.00671995	6.63665	up	Yes	chr13	zinc finger protein 65 [Source:MGI Symbol;Acc:MGI:107769]	ENSMUSG00000071281	Zfp65	chr13:67705309-67729173:-	NM_145622	3957	CTCCCCAAAGTTAATCGAGTGTCTTGGGTTTGGATCCCTGACATGGAGGAAATGCTGTCA	GENCODE	-
ENSMUST00000072438	1.28897e-05	0.00106337	9.82243	up	Yes	chr7	cytochrome P450, family 2, subfamily b, polypeptide 10 [Source:MGI Symbol;Acc:MGI:88598]	ENSMUSG00000030483	Cyp2b10	chr7:25897620-25926624:+	NM_009999	1916	GCTCTCCATGATCTGGGATCTGTGCTAATGGACTCTGTATAAGGTCTGAATTCTATGTCT	GENCODE	+
ENSMUST00000072204	9.98329e-07	0.000311146	13.7483	up	Yes	chr7	kallikrein 1-related peptidase b8 [Source:MGI Symbol;Acc:MGI:892018]	ENSMUSG00000063089	Klk1b8	chr7:43950664-43954941:+	NM_008457	859	CGAAAAATTCCTGAGTGTCACATTATCCCATGTTCTCAATAAAACCCACCATGAAGCAAA	GENCODE	+
ENSMUST00000070832	1.96731e-06	0.000403858	12.4517	up	Yes	chr11	WAP four-disulfide core domain 21 [Source:MGI Symbol;Acc:MGI:1913357]	ENSMUSG00000051748	Wfdc21	chr11:83746940-83752642:+	NM_183249	434	AGCACAGTGGAGTGGGACAAGGAGTTGTTTCTTTTAATAAATCATTAATGTAAAAGTCTC	GENCODE	+
ENSMUST00000070323	0.00333285	0.0194165	19.827	down	Yes	chr14	synaptoporin [Source:MGI Symbol;Acc:MGI:1919253]	ENSMUSG00000056296	Synpr	chr14:13284780-13615459:+	NM_028052	2541	CGCACAGCGCTCTACACTGACTGAGCCACAGCGAGCTGGAACCTACAGCCGGCGCTCCCC	GENCODE	+
ENSMUST00000069927	9.18721e-05	0.00282761	6.34091	up	Yes	chr3	S100 calcium binding protein A8 (calgranulin A) [Source:MGI Symbol;Acc:MGI:88244]	ENSMUSG00000056054	S100a8	chr3:90668978-90670035:+	NM_013650	486	TCAAGACATCGTTTGAAAGGAAATCTTTCGTGACAATGCCGTCTGAACTGGAGAAGGCCT	GENCODE	+
ENSMUST00000069562	9.71298e-05	0.00286679	8.25145	up	Yes	chr7	tescalcin-like [Source:MGI Symbol;Acc:MGI:1916551]	ENSMUSG00000055826	Tescl	chr7:24333082-24333936:-	NM_001163810	855	CAGCTACAGGGTACATGGGACTTGATGGATTTCATCTCAAAGAATAAAGATGATCAAAAG	GENCODE	-
ENSMUST00000065438	1.53231e-06	0.000355837	7.21617	up	Yes	chr2	cadherin 22 [Source:MGI Symbol;Acc:MGI:1341843]	ENSMUSG00000053166	Cdh22	chr2:165111507-165234853:-	NM_174988	3702	GAAGATTTGAGAGGATCAAAAGGGTTCATGTGTCAAGTTGTTGGGCGGTGCCTGGCACAG	GENCODE	-	Cytoplasm
ENSMUST00000065436	4.23904e-07	0.000203332	9.95802	down	Yes	chr1	dynein assembly factor with WDR repeat domains 1 [Source:MGI Symbol;Acc:MGI:1923089]	ENSMUSG00000053161	Daw1	chr1:83159762-83210568:+	NM_027725	1349	TGCCATAGCCTTCAACAATCCTTACGGGAAGGTGCACACTTTAATTGGTCACTGTGCTGA	GENCODE	+
ENSMUST00000063492	6.16028e-07	0.000234091	22.0575	down	Yes	chr15	R-spondin 2 [Source:MGI Symbol;Acc:MGI:1922667]	ENSMUSG00000051920	Rspo2	chr15:43020797-43170818:-	NM_001357957	3338	GTGCCATCTGCGTTAAACTGCTGCGTGGATCGTGCCAGTTCACCGTGGAGGGAGAGATGC	GENCODE	-
ENSMUST00000063062	3.53932e-05	0.00180971	10.7396	up	Yes	chr3	chitinase-like 3 [Source:MGI Symbol;Acc:MGI:1330860]	ENSMUSG00000040809	Chil3	chr3:106147554-106167564:-	NM_009892	1539	ACACAGTGCAAGTTGCAAGGGCCCTTATTGAGAGGAGCTTTACACAATGATTTGTCCTTG	GENCODE	-
ENSMUST00000059555	5.73274e-06	0.000681089	5.46102	down	Yes	chr9	ubiquitin-conjugating enzyme E2Q family member 2 [Source:MGI Symbol;Acc:MGI:2388672]	ENSMUSG00000032307	Ube2q2	chr9:55148854-55207529:+	NM_180600	3456	AGACTCTTTGAGCAAAATTATGAAAGATACCTAAATTGGAGATCCTTAAATTTTTGCTGT	GENCODE	+
ENSMUST00000054683	0.000125605	0.00327122	6.88508	up	Yes	chr11	olfactory receptor 324 [Source:MGI Symbol;Acc:MGI:3030158]	ENSMUSG00000056564	Olfr324	chr11:58597345-58598466:+	NM_001011743	1122	AGTTTTCATGTGGGGGCCTTCGATTTCTTCTCGTTTGGACAGGTATGGCTCAGCCGCAGG	GENCODE	+
ENSMUST00000053640	4.03521e-05	0.0019064	7.00176	down	Yes	chr18	adrenergic receptor, beta 2 [Source:MGI Symbol;Acc:MGI:87938]	ENSMUSG00000045730	Adrb2	chr18:62177817-62179959:-	NM_007420	2143	CTCCACTTATTTACTCAAATGGAGTGTTGCAGGCAGGGATTTGAGGGACAACATCAGTTG	GENCODE	-
ENSMUST00000052521	7.68993e-07	0.000276744	9.58114	down	Yes	chr11	growth arrest-specific 2 like 2 [Source:MGI Symbol;Acc:MGI:3652048]	ENSMUSG00000020686	Gas2l2	chr11:83421902-83429455:-	NM_001013759	2610	GACCCACCACCGCCCATACCCCCTGCCCGCAGGCCTTGCCACTTCCACAACCTGGACCAG	GENCODE	-
ENSMUST00000051184	9.63423e-08	0.00010739	5.79457	down	Yes	chr14	potassium channel regulator [Source:MGI Symbol;Acc:MGI:2685591]	ENSMUSG00000046168	Kcnrg	chr14:61607482-61612826:+	NM_001039105	1766	TGTGGCTCCGATGGCGCTGCTGAGAACCAAGCTGGAGTCAGGTACATTTCCATAAAGCCT	GENCODE	+
ENSMUST00000051079	0.000123759	0.00325329	4.77825	down	Yes	chr12	glycoprotein hormone beta 5 [Source:MGI Symbol;Acc:MGI:2156540]	ENSMUSG00000048982	Gphb5	chr12:75411722-75416781:-	NM_175644	1612	AGGAGCACCTGTACGATGTCAATAAAGTGTGGTCCCTGCCATCGGGATCCACGCAAACTT	GENCODE	-
ENSMUST00000050707	0.00132106	0.0112925	4.77229	up	Yes	chrX	V-set and immunoglobulin domain containing 4 [Source:MGI Symbol;Acc:MGI:2679720]	ENSMUSG00000044206	Vsig4	chrX:96247203-96293438:-	NM_177789	1432	CTATGGAGTGAGCAGGGTGTTTGCCAGGAAGACAAGCAACTCTGAAGAAACCACAAGGGT	GENCODE	-
ENSMUST00000049285	0.00333063	0.0194103	7.18403	down	Yes	chr6	leucine rich repeat protein 1, neuronal [Source:MGI Symbol;Acc:MGI:106038]	ENSMUSG00000034648	Lrrn1	chr6:107529768-107570214:+	NM_008516	3700	CAAGCTAACAGGCAATAGAAATATGTATATCAGATTTTCTAATGTAATGAACTACATGGT	GENCODE	+	Cytoplasm
ENSMUST00000049074	1.61693e-05	0.00119658	4.88301	down	Yes	chr4	protein tyrosine phosphatase, receptor type, F [Source:MGI Symbol;Acc:MGI:102695]	ENSMUSG00000033295	Ptprf	chr4:118208213-118291405:-	NM_011213	7656	GATGCGAAGGCTTAACTACCAGACCCCAGGTATGCGAGACCACCCGCCCATCCCCATCAC	GENCODE	-	Nucleus
ENSMUST00000048691	3.28338e-06	0.000503652	5.61319	down	Yes	chr17	patched domain containing 4 [Source:MGI Symbol;Acc:MGI:1920485]	ENSMUSG00000042256	Ptchd4	chr17:42315947-42505077:+	NM_028474	4226	CTGGAAAATGTAGCGAGTAAAATGAGCCATCTACCATTCACCATCTCGGCATCAAACAGC	GENCODE	+
ENSMUST00000046897	0.00296654	0.0180462	4.77981	up	Yes	chr4	tripartite motif-containing 14 [Source:MGI Symbol;Acc:MGI:1921985]	ENSMUSG00000039853	Trim14	chr4:46506847-46536141:-	NM_029077	1429	CCTAGGTTGCCCTAAGGGAAATCGGGCTTTCTTTTCCTAGGCTTGTCTCCAGTTGTCCCC	GENCODE	-
ENSMUST00000046383	0.00054991	0.00690399	6.70669	down	Yes	chr3	tumor necrosis factor (ligand) superfamily, member 10 [Source:MGI Symbol;Acc:MGI:107414]	ENSMUSG00000039304	Tnfsf10	chr3:27317028-27339665:+	NM_009425	4993	TTGATACCATTTTGTGGGCTGGGAAATGTTAAACTTTGTAAACTCTGAAACGCACAAAGT	GENCODE	+
ENSMUST00000044019	0.000365333	0.00562983	5.08172	down	Yes	chr6	solute carrier family 41, member 3 [Source:MGI Symbol;Acc:MGI:1918949]	ENSMUSG00000030089	Slc41a3	chr6:90604725-90646412:+	NM_027868	2412	TGAACTATTTCCAGCACTGGCCAGTGTTCAAAGATGTTAAAGACCTGATGACGTTGGTGC	GENCODE	+
ENSMUST00000040002	7.80819e-05	0.00259101	10.2971	up	Yes	chrX	proline rich 32 [Source:MGI Symbol;Acc:MGI:1916050]	ENSMUSG00000037086	Prr32	chrX:45090904-45092791:+	NM_026841	1110	GGGGAAAGAGTTGAACATTACTCACTTTCTTCATATATAAAATTCTCTATCCTTTTACAT	GENCODE	+
ENSMUST00000039026	0.000694598	0.00776316	5.77106	down	Yes	chrX	apelin [Source:MGI Symbol;Acc:MGI:1353624]	ENSMUSG00000037010	Apln	chrX:48025146-48034853:-	NM_013912	3149	AGTGGAGTTGCTTGATGAATGAGATAACCTGGAAAATAAACTTCGAGGAGTTCGATAGGA	GENCODE	-	Exosome
ENSMUST00000038223	0.00106298	0.00980306	5.41103	up	Yes	chr2	zinc finger SWIM-type containing 2 [Source:MGI Symbol;Acc:MGI:1919111]	ENSMUSG00000034552	Zswim2	chr2:83915079-83941226:-	NM_027964	2062	ACCATGTACTCACAAGTTTCACAGGAAATGTATTGACAATTGGTTACTCCACAAGTGCAA	GENCODE	-
ENSMUST00000037585	0.000117934	0.00320227	4.70975	down	Yes	chr14	DENN/MADD domain containing 6A [Source:MGI Symbol;Acc:MGI:2442980]	ENSMUSG00000040818	Dennd6a	chr14:26579578-26634322:+	NM_001134465	6638	ACCTTGCCAAAAGTAGAATGAGATAGTTTGGTTTCAGATGGGAGTGTTGCAGAAGCCACT	GENCODE	+
ENSMUST00000037048	1.35436e-07	0.000119183	11.7533	down	Yes	chr5	monocyte to macrophage differentiation-associated 2 [Source:MGI Symbol;Acc:MGI:1922354]	ENSMUSG00000039533	Mmd2	chr5:142562358-142608800:-	NM_175217	3317	ATGTGGTGATGGGTTTCTTCCCTGCCCTGGTCATCCTCTCCATGCCCAACACTGATGGCA	GENCODE	-
ENSMUST00000036884	7.01839e-05	0.00250743	5.02999	down	Yes	chr19	Kruppel-like factor 9 [Source:MGI Symbol;Acc:MGI:1333856]	ENSMUSG00000033863	Klf9	chr19:23141226-23166911:+	NM_010638	3263	TCACTAGCGCAGTGTTTTCTGTTTAACCAATGTAGTTGTATCAGTAGTTCTCTCAGAACT	GENCODE	+
ENSMUST00000034045	1.9538e-07	0.000148489	23.67	down	Yes	chr8	centromere protein U [Source:MGI Symbol;Acc:MGI:1919126]	ENSMUSG00000031629	Cenpu	chr8:46552028-46580007:+	NM_027973	2931	GTTCAGAGCAAGACCGGCTAGGCGCGAGTTTGGAGTCCCTGCCTTTGGGAACGGTAGGAT	GENCODE	+	Nucleus
ENSMUST00000033427	1.2205e-06	0.000336142	4.6944	down	Yes	chrX	SAM and SH3 domain containing 3 [Source:MGI Symbol;Acc:MGI:1921381]	ENSMUSG00000031101	Sash3	chrX:48146436-48161565:+	NM_001313749	2677	AGCTGCAGAGCTGCTACTGGACTATGACACTGGCAGTGAAGAGGCTGAAGAGGGTGCTGA	GENCODE	+
ENSMUST00000032555	2.52008e-06	0.000463031	7.05252	down	Yes	chr7	translocase of outer mitochondrial membrane 40 [Source:MGI Symbol;Acc:MGI:1858259]	ENSMUSG00000002984	Tomm40	chr7:19701329-19715425:-	NM_001109748	1646	GGGTGTGCGTGTCGCCCCGATCCCTGCCCTCTGACCTTTCCCCTCGCAGATACCATGGGG	GENCODE	-
ENSMUST00000032459	2.00646e-05	0.00131561	4.93269	down	Yes	chr6	vestigial like family member 4 [Source:MGI Symbol;Acc:MGI:2652840]	ENSMUSG00000030315	Vgll4	chr6:114861424-114921821:-	NM_177683	2028	GGACAAGATGAACAACAATATCGGCGTTCTGTGCTATGAAGGTGAAGCTTCCCTCAGGGG	GENCODE	-
ENSMUST00000031678	0.000121073	0.00323377	4.68312	down	Yes	chr6	tetraspanin 12 [Source:MGI Symbol;Acc:MGI:1889818]	ENSMUSG00000029669	Tspan12	chr6:21771395-21852515:-	NM_173007	2490	TCTCTGGGGTGTCACTCTGGGAGTTAGCGACGCCGACGGTTGGAGAGAGGAAGACAAGGA	GENCODE	-
ENSMUST00000031109	5.62052e-07	0.00022375	11.9593	down	Yes	chr5	NOL1/NOP2/Sun domain family, member 7 [Source:MGI Symbol;Acc:MGI:1918168]	ENSMUSG00000029206	Nsun7	chr5:66260312-66298015:+	NM_001302833	2345	TGCCAGCCACCCATTTTTATTACCGCTTCATTGGATCAAAGGACTCTTCTAGGGAGGACA	GENCODE	+
ENSMUST00000030952	1.3322e-07	0.000119183	9.50712	down	Yes	chr4	tumor necrosis factor receptor superfamily, member 4 [Source:MGI Symbol;Acc:MGI:104512]	ENSMUSG00000029075	Tnfrsf4	chr4:156013843-156016612:+	NM_011659	1030	ACCTCGGCAGGACAGCGGCTACAAGCTTGGAGTTGACTGTGTTCCCTGCCCTCCTGGCCA	GENCODE	+
ENSMUST00000029516	0.00200939	0.0144048	5.02937	up	Yes	chr3	trichohyalin-like 1 [Source:MGI Symbol;Acc:MGI:1918575]	ENSMUSG00000027908	Tchhl1	chr3:93468754-93471980:+	NM_027762	2066	TGATCTGTTTGGCTTGATGGATACTTGGATTAAACTCGATAATTAAATAACTTGATGATC	GENCODE	+
ENSMUST00000029116	3.30663e-05	0.00175354	5.39565	down	Yes	chr2	protein-L-isoaspartate (D-aspartate) O-methyltransferase domain containing 2 [Source:MGI Symbol;Acc:MGI:1923927]	ENSMUSG00000027589	Pcmtd2	chr2:181837854-181857461:+	NM_153594	3569	AAACATATGGGTAAACACAAATGAATCAATAAAATCGTGTTACGACATTCTATTCTCAGT	GENCODE	+
ENSMUST00000029030	2.43817e-05	0.00148782	5.34763	up	Yes	chr2	endothelin 3 [Source:MGI Symbol;Acc:MGI:95285]	ENSMUSG00000027524	Edn3	chr2:174760619-174784042:+	NM_007903	3117	TCTCAAAAACAAGAAGGAAAAGAAAACAGGAGATCTAGATGTTCATGAGACAAAAAGAGA	GENCODE	+
ENSMUST00000028430	0.014879	0.0498952	6.16618	up	Yes	chr2	cytochrome c, testis [Source:MGI Symbol;Acc:MGI:88579]	ENSMUSG00000056436	Cyct	chr2:76353942-76360450:-	NM_009989	655	GCTTCAAAATATTCGCTACCAGTTTCAAATATTGTGTTTAATAAGAAGCATATCTGATCT	GENCODE	-
ENSMUST00000028118	6.36189e-06	0.000713898	5.15013	up	Yes	chr2	protein kinase C, theta [Source:MGI Symbol;Acc:MGI:97601]	ENSMUSG00000026778	Prkcq	chr2:11172108-11301222:+	NM_008859	3583	AAACTTGAAATTTACAAATCTGTTCATTCTGGCTAGCCCCAAAATTCCCAAGGCAGAGGA	GENCODE	+
ENSMUST00000027036	3.45162e-05	0.00177573	5.85342	down	Yes	chr1	lysophospholipase 1 [Source:MGI Symbol;Acc:MGI:1344588]	ENSMUSG00000025903	Lypla1	chr1:4807823-4846739:+	NM_008866	2507	TGTTCTGTGAAGATGTGTTCAGGTAAGATGTAAGTGACTTCTTAGTTCTGTGAGTTAGAC	GENCODE	+
ENSMUST00000026032	8.16614e-05	0.00263539	5.1912	down	Yes	chr19	polycomb group ring finger 6 [Source:MGI Symbol;Acc:MGI:1918291]	ENSMUSG00000025050	Pcgf6	chr19:47033619-47050845:-	NM_001360632	2098	GACACCGGACATTTTAAGCCATTGGAAAAGAAGTTTGTGCGTGTTTCAGGAGAAGCAACT	GENCODE	-	Nucleus
ENSMUST00000025778	0.000135838	0.00342145	5.30484	down	Yes	chr19	glycine decarboxylase [Source:MGI Symbol;Acc:MGI:1341155]	ENSMUSG00000024827	Gldc	chr19:30098449-30175418:-	NM_138595	3754	GCAGCATTTCCACTGCCCTTTGTGAAACCAGAGAACAAATTCTGGCCAACCATTGCCCGG	GENCODE	-
ENSMUST00000025520	0.0025189	0.0162673	6.28603	up	Yes	chr18	solute carrier family 6 (neurotransmitter transporter, L-proline), member 7 [Source:MGI Symbol;Acc:MGI:2147363]	ENSMUSG00000052026	Slc6a7	chr18:60995381-61014199:-	NM_201353	3342	TCTCCCCAGCCCATTTGTGTTCTTCTGGTAGGTTGTCAATAAATCCCAAATGGCATCGTC	GENCODE	-
ENSMUST00000023840	0.03443	0.0884693	23.0182	up	Yes	chr5	chemokine (C-X-C motif) ligand 13 [Source:MGI Symbol;Acc:MGI:1888499]	ENSMUSG00000023078	Cxcl13	chr5:95956951-95961068:+	NM_018866	1150	CTCTTGTATCAGATTCTTTAATGTTTCCTATTCATCTGGTGTCATTCAATAAATGTAATC	GENCODE	+
ENSMUST00000023238	0.0174803	0.0558429	6.66788	down	Yes	chr15	gasdermin D [Source:MGI Symbol;Acc:MGI:1916396]	ENSMUSG00000022575	Gsdmd	chr15:75862327-75867408:+	NM_026960	1792	GCCCAGTGCTCCAGAACCAGAACCGGAGTGTTTTGGCTCCTTCAAAGTCTCTGATGTCGT	GENCODE	+
ENSMUST00000022358	2.51133e-06	0.000463031	5.75748	down	Yes	chr14	zinc finger SWIM-type containing 8 [Source:MGI Symbol;Acc:MGI:1919156]	ENSMUSG00000021819	Zswim8	chr14:20707552-20723619:+	NM_027996	6073	GCCTCGAGTCTCGCAGGCTGGCCACAATCCCCGCTCGCACCTCGCTGTTGGGTGAGGCCC	GENCODE	+
ENSMUST00000021506	1.20585e-05	0.00105487	6.09555	up	Yes	chr12	serine (or cysteine) peptidase inhibitor, clade A, member 3N [Source:MGI Symbol;Acc:MGI:105045]	ENSMUSG00000021091	Serpina3n	chr12:104406729-104414329:+	NM_009252	2064	GGAACACCACCAACCAGAATAAAGAGGTAGGAGCAAAAGATCAATAAACATATAACTGCA	GENCODE	+
ENSMUST00000020531	0.00561724	0.0268958	6.21119	up	Yes	chr11	hemoglobin X, alpha-like embryonic chain in Hba complex [Source:MGI Symbol;Acc:MGI:96019]	ENSMUSG00000055609	Hba-x	chr11:32276400-32278116:+	NM_010405	801	GACTCTAGAGAGGCTCTTCTGCAGCTACCCCCAGACGAAGACCTACTTCCCCCACTTCGA	GENCODE	+
ENSMUST00000020258	0.000181411	0.00388373	5.42203	down	Yes	chr10	hect domain and RLD 4 [Source:MGI Symbol;Acc:MGI:1914595]	ENSMUSG00000020064	Herc4	chr10:63243911-63317874:+	NM_026101	3898	TCATACCGCATTAAAGGTTTTAGAAATATTGCATAGGGTAAATGAGAAAACAGGACAACT	GENCODE	+	Nucleus
ENSMUST00000019901	1.07592e-06	0.000315604	9.39672	down	Yes	chr10	coiled-coil domain containing 170 [Source:MGI Symbol;Acc:MGI:2685067]	ENSMUSG00000019767	Ccdc170	chr10:4509872-4561111:+	NM_001195672	2151	GTCAAGGTGTAGCTAGCGAGGGAACTGCCAGTCATCGCCCAGAAGTCCCTGATACCTGGG	GENCODE	+
ENSMUST00000018571	0.000430861	0.00613106	5.81629	down	Yes	chr11	yippee like 2 [Source:MGI Symbol;Acc:MGI:1925114]	ENSMUSG00000018427	Ypel2	chr11:86936425-86993707:-	NM_001005341	4847	TTCTGTCATTGCTGATCTGTGTTGGTGCTCATTTGAGAAAATAAAGTTTTCAAATACTAA	GENCODE	-
ENSMUST00000009396	2.93591e-06	0.000482883	12.3778	down	Yes	chr7	tetraspanin 32 [Source:MGI Symbol;Acc:MGI:1350360]	ENSMUSG00000000244	Tspan32	chr7:143005046-143019486:+	NM_001128080	1582	TCAAGATTGCCAAATGCCAGATACTGATCACCAACTTCCTAGTCTTGCTGCTGGGCCTCT	GENCODE	+
ENSMUST00000009329	0.00190649	0.0139765	7.94267	up	Yes	chr11	chemokine (C-C motif) ligand 8 [Source:MGI Symbol;Acc:MGI:101878]	ENSMUSG00000009185	Ccl8	chr11:82115185-82116799:+	NM_021443	511	TCATCCTTGTCTGTTATATGAACAACTGAAATAAAAGCTTACACTGATTTGCAAATGTAA	GENCODE	+
ENSMUST00000005933	4.57667e-07	0.000206699	17.3157	up	Yes	chr7	kallikrein 1-related peptidase b16 [Source:MGI Symbol;Acc:MGI:891982]	ENSMUSG00000038968	Klk1b16	chr7:44136767-44141610:+	NM_008454	1387	AAAATGCTTGAGTGTCACATTGTTCCATGTTTTCAATAAAACCCAACATGAAGCAAATGA	GENCODE	+
ENSMUST00000003017	9.44859e-06	0.000892545	5.28881	up	Yes	chr6	thromboxane A synthase 1, platelet [Source:MGI Symbol;Acc:MGI:98497]	ENSMUSG00000029925	Tbxas1	chr6:38918980-39084585:+	NM_011539	1990	AGGCACACTCTAAGAAAGAGCACTTTTGGGGGACTCACTTGATGGGATGTTCAGCTGACT	GENCODE	+
ENSMUST00000000304	5.69634e-06	0.000681089	5.02079	down	Yes	chr10	HD domain containing 2 [Source:MGI Symbol;Acc:MGI:1916942]	ENSMUSG00000000295	Hddc2	chr10:31313383-31328204:+	NM_027168	858	TGACACCGCCCAGCTCTTATGCACTTCAGCATGGCTTTGGCCTCGTCCGGCTCTGGAGCC	GENCODE	+
*P-values adjusted using Benjamini–Hochberg FDR method.

## Sheet: Sheet2
Transcript_ID	P-value	FDR	Fold Change	Regulation	Canonical	chrom	description	GeneID	GeneSymbol	Is_CancerGene	Locus	refseqID	RNAlength	Sequence	source	strand	Subcellular_Localization	TF	ProbeName	txEnd	txStart	type	group-20m(raw)	group-3m(raw)	group-20m(normalized)	group-3m(normalized)	[20m-1, 20m](raw)	[20m-2, 20m](raw)	[20m-3, 20m](raw)	[20m-4, 20m](raw)	[20m-5, 20m](raw)	[3m-1, 3m](raw)	[3m-2, 3m](raw)	[3m-3, 3m](raw)	[3m-4, 3m](raw)	[3m-5, 3m](raw)	[20m-1, 20m](normalized)	[20m-2, 20m](normalized)	[20m-3, 20m](normalized)	[20m-4, 20m](normalized)	[20m-5, 20m](normalized)	[3m-1, 3m](normalized)	[3m-2, 3m](normalized)	[3m-3, 3m](normalized)	[3m-4, 3m](normalized)	[3m-5, 3m](normalized)
ENSMUST00000107974	3.115e-10	1.042e-06	39.4303	down	Yes	chr7	IgLON family member 5 [Source:MGI Symbol;Acc:MGI:2686277]	ENSMUSG00000013367	Iglon5		chr7:43472904-43490075:-	NM_001164518	2622	GGTCTACCTCATCGTCCATGTCCCTGCCCGTATTGTGAACATCTCCTCACCCGTGGCAGT	GENCODE	-			ASMM10AP1B118017343V4	43490075	43472904	protein_coding	538.762	28075.8	9.3068	14.608	519.637	652.464	422.762	474.564	624.382	18510.2	23619.8	40670.9	38764.9	18813.3	9.23155	9.48139	9.25706	9.12574	9.43825	14.4015	14.8265	14.824	14.7758	14.2124
ENSMUST00000034045	1.9538e-07	0.000148489	23.67	down	Yes	chr8	centromere protein U [Source:MGI Symbol;Acc:MGI:1919126]	ENSMUSG00000031629	Cenpu		chr8:46552028-46580007:+	NM_027973	2931	GTTCAGAGCAAGACCGGCTAGGCGCGAGTTTGGAGTCCCTGCCTTTGGGAACGGTAGGAT	GENCODE	+	Nucleus		ASMM10AP1B114341051V4	46580007	46552028	protein_coding	19.8119	692.518	4.43269	8.99768	20.75	25.5777	22.9637	15.2669	14.5009	329.515	512.683	1060.44	1141.49	418.468	4.44074	4.64901	4.75879	4.22506	4.08987	8.41899	9.08254	9.48987	9.57173	8.42527
ENSMUST00000063492	6.16028e-07	0.000234091	22.0575	down	Yes	chr15	R-spondin 2 [Source:MGI Symbol;Acc:MGI:1922667]	ENSMUSG00000051920	Rspo2		chr15:43020797-43170818:-	NM_001357957	3338	GTGCCATCTGCGTTAAACTGCTGCGTGGATCGTGCCAGTTCACCGTGGAGGGAGAGATGC	GENCODE	-			ASMM10AP1B108940952V4	43170818	43020797	protein_coding	12.3867	373.627	3.73182	8.19502	10.7123	11.9109	10.6778	10.993	17.6393	214.161	479.327	388.164	566.814	219.668	3.43564	3.5106	3.58387	3.74904	4.37993	7.81908	8.99075	8.07092	8.58867	7.50567
ENSMUST00000070323	0.00333285	0.0194165	19.827	down	Yes	chr14	synaptoporin [Source:MGI Symbol;Acc:MGI:1919253]	ENSMUSG00000056296	Synpr		chr14:13284780-13615459:+	NM_028052	2541	CGCACAGCGCTCTACACTGACTGAGCCACAGCGAGCTGGAACCTACAGCCGGCGCTCCCC	GENCODE	+			ASMM10AP1B122691174V4	13615459	13284780	protein_coding	10.6808	344.502	3.11789	7.42729	5	5	5	29.1888	9.21526	93.0023	608.621	466.016	528.175	26.6973	2.33259	2.33065	2.33871	5.1699	3.41761	6.63484	9.33272	8.33856	8.48553	4.34479
ENSMUST00000081946	1.366e-10	7.61e-07	16.481	down	Yes	chr7	translocase of inner mitochondrial membrane 50 [Source:MGI Symbol;Acc:MGI:1913775]	ENSMUSG00000003438	Timm50		chr7:28305516-28312072:-	NM_025616	1515	ATTACAGACAGATGATCATCGAGCCCACCAGTCCCTGCCTTCTCCCAGACCCTCTGCGGG	GENCODE	-			ASMM10AP1B115544360V4	28312072	28305516	protein_coding	2831.52	59336.2	11.7235	15.7662	2779.63	2835.69	2263.75	2914.28	3364.27	44701.9	51449.1	80305.9	77769.1	42455	11.728	11.7199	11.872	11.5652	11.7321	15.754	15.9217	15.8607	15.8537	15.4408
ENSMUST00000163281	4.87371e-05	0.00205858	14.1952	down	Yes	chr4	selection and upkeep of intraepithelial T cells 7 [Source:MGI Symbol;Acc:MGI:3041190]	ENSMUSG00000049214	Skint7		chr4:111972927-111988223:+	NM_001142775	1423	TTCTTTGCAATATATTTACCTCACCGCAGCAGAGTCTCTCTTTCAGATCCTCAGTTTCCC	GENCODE	+			ASMM10AP1B107309583V4	111988223	111972927	protein_coding	36.4503	834.685	5.36657	9.1939	35.5262	37.8083	33.8632	33.992	41.062	637.2	1973.73	474.637	653.512	434.349	5.23968	5.23147	5.36265	5.38797	5.61108	9.34061	10.9947	8.36783	8.79049	8.47587
ENSMUST00000073528	1.33133e-08	2.226e-05	13.0678	down	Yes	chr5	zygote arrest 1 [Source:MGI Symbol;Acc:MGI:2180337]	ENSMUSG00000063935	Zar1		chr5:72577114-72581254:-	NM_174877	1429	CATCACCTGTCAAAGTTGTAAAAGAACTAGATGTGCCTGCCCAGTCAGACTTCGCCACGT	GENCODE	-		Yes	ASMM10AP1B118686111V4	72581254	72577114	protein_coding	36.5891	659.57	5.37468	9.08263	33.1581	40.7316	40.4588	32.619	35.9777	472.844	751.624	700.273	796.804	576.305	5.13985	5.34505	5.63984	5.32932	5.41936	8.92271	9.62612	8.90489	9.06147	8.89794
ENSMUST00000009396	2.93591e-06	0.000482883	12.3778	down	Yes	chr7	tetraspanin 32 [Source:MGI Symbol;Acc:MGI:1350360]	ENSMUSG00000000244	Tspan32		chr7:143005046-143019486:+	NM_001128080	1582	TCAAGATTGCCAAATGCCAGATACTGATCACCAACTTCCTAGTCTTGCTGCTGGGCCTCT	GENCODE	+			ASMM10AP1B100270498V4	143019486	143005046	protein_coding	70.3536	1334.19	6.28685	9.91654	74.4242	83.5955	47.2797	54.0446	92.424	501.426	706.995	1902.29	2017.02	1543.23	6.33549	6.42367	5.88733	6.04211	6.74565	9.00041	9.54298	10.3019	10.3784	10.359
ENSMUST00000031109	5.62052e-07	0.00022375	11.9593	down	Yes	chr5	NOL1/NOP2/Sun domain family, member 7 [Source:MGI Symbol;Acc:MGI:1918168]	ENSMUSG00000029206	Nsun7		chr5:66260312-66298015:+	NM_001302833	2345	TGCCAGCCACCCATTTTTATTACCGCTTCATTGGATCAAAGGACTCTTCTAGGGAGGACA	GENCODE	+			ASMM10AP1B107816028V4	66298015	66260312	protein_coding	16.4535	274.163	4.17551	7.75558	15.4369	16.0339	15.4855	19.64	15.6713	126.492	271.357	315.608	445.055	212.302	3.98706	3.95321	4.15202	4.57957	4.20571	7.06813	8.20886	7.79566	8.24495	7.4603
ENSMUST00000037048	1.35436e-07	0.000119183	11.7533	down	Yes	chr5	monocyte to macrophage differentiation-associated 2 [Source:MGI Symbol;Acc:MGI:1922354]	ENSMUSG00000039533	Mmd2		chr5:142562358-142608800:-	NM_175217	3317	ATGTGGTGATGGGTTTCTTCCCTGCCCTGGTCATCCTCTCCATGCCCAACACTGATGGCA	GENCODE	-			ASMM10AP1B108009665V4	142608800	142562358	protein_coding	1256.08	21096	10.5816	14.1366	1332.85	1489.52	1202.93	1002.16	1252.91	13514.5	18121	29965.6	30516.1	13362.7	10.6363	10.7837	10.9321	10.1579	10.3979	13.8754	14.4015	14.3443	14.4015	13.6601
ENSMUST00000179074	1.15939e-06	0.000334224	10.767	down	Yes	chr17	solute carrier family 30 (zinc transporter), member 6 [Source:MGI Symbol;Acc:MGI:2386741]	ENSMUSG00000024069	Slc30a6		chr17:74395621-74424009:+	NM_001252478	1938	GCATTAACTGCCTATACTTACCTCACCATCTTTGATCTCTTTAGTTTGTTTTTCTTTAGT	GENCODE	+	Nucleus		ASMM10AP1B114934321V4	74424009	74395621	protein_coding	68.2284	1023.52	6.2146	9.64314	61.117	75.0872	44.4141	53.2392	107.284	496.434	798.998	1209.49	1503.85	1108.85	6.04617	6.26455	5.78808	6.02038	6.95383	8.98991	9.71513	9.6654	9.97062	9.87465
ENSMUST00000233430	1.2889e-06	0.000342069	10.6944	down	Yes	chr17	male enhanced antigen 1 [Source:MGI Symbol;Acc:MGI:96957]	ENSMUSG00000002768	Mea1		chr17:46680986-46683102:+	NM_001277309	945	GAAGTGAAGGTGCGGGTCCGGCTGTGGGCTCTGAGAGGCCCCTGCCCGGATGGCAGCAGT	GENCODE	+	Cytoplasm		ASMM10AP1B128590645V4	46683102	46680986	protein_coding	24.8069	383.237	4.7908	8.20958	27.8028	22.514	23.8222	27.818	22.0772	217.746	359.883	520.633	610.445	207.477	4.87487	4.45725	4.81463	5.09559	4.71165	7.84162	8.59286	8.49592	8.68848	7.42901
ENSMUST00000065436	4.23904e-07	0.000203332	9.95802	down	Yes	chr1	dynein assembly factor with WDR repeat domains 1 [Source:MGI Symbol;Acc:MGI:1923089]	ENSMUSG00000053161	Daw1		chr1:83159762-83210568:+	NM_027725	1349	TGCCATAGCCTTCAACAATCCTTACGGGAAGGTGCACACTTTAATTGGTCACTGTGCTGA	GENCODE	+			ASMM10AP1B106541851V4	83210568	83159762	protein_coding	7.27814	87.6967	2.91153	6.22739	5.89597	9.54904	5	6.24262	9.70306	67.6648	81.243	111.216	94.3359	84.0242	2.59996	3.17263	2.33871	2.95447	3.49188	6.20282	6.51602	6.34306	6.02574	6.04933
ENSMUST00000052521	7.68993e-07	0.000276744	9.58114	down	Yes	chr11	growth arrest-specific 2 like 2 [Source:MGI Symbol;Acc:MGI:3652048]	ENSMUSG00000020686	Gas2l2		chr11:83421902-83429455:-	NM_001013759	2610	GACCCACCACCGCCCATACCCCCTGCCCGCAGGCCTTGCCACTTCCACAACCTGGACCAG	GENCODE	-			ASMM10AP1B119811509V4	83429455	83421902	protein_coding	750.044	10412.6	9.79731	13.0575	665.48	1024.52	625.632	661.722	772.863	6831.52	10218	14366.4	15079.3	5567.55	9.61227	10.1806	9.86969	9.58824	9.73579	12.8017	13.5159	13.2637	13.3503	12.356
ENSMUST00000030952	1.3322e-07	0.000119183	9.50712	down	Yes	chr4	tumor necrosis factor receptor superfamily, member 4 [Source:MGI Symbol;Acc:MGI:104512]	ENSMUSG00000029075	Tnfrsf4		chr4:156013843-156016612:+	NM_011659	1030	ACCTCGGCAGGACAGCGGCTACAAGCTTGGAGTTGACTGTGTTCCCTGCCCTCCTGGCCA	GENCODE	+			ASMM10AP1B124274667V4	156016612	156013843	protein_coding	472.667	6844.84	9.13331	12.3823	460.961	555.74	413.175	429.864	503.592	3919.98	5774.9	9760.94	10526	4242.37	9.07157	9.2205	9.22381	9.00273	9.14793	11.959	12.6183	12.6374	12.7815	11.9154
ENSMUST00000019901	1.07592e-06	0.000315604	9.39672	down	Yes	chr10	coiled-coil domain containing 170 [Source:MGI Symbol;Acc:MGI:2685067]	ENSMUSG00000019767	Ccdc170		chr10:4509872-4561111:+	NM_001195672	2151	GTCAAGGTGTAGCTAGCGAGGGAACTGCCAGTCATCGCCCAGAAGTCCCTGATACCTGGG	GENCODE	+			ASMM10AP1B118042035V4	4561111	4509872	protein_coding	13.8863	168.602	3.8657	7.09786	13.8968	21.7675	13.198	8.1987	12.3705	79.5792	129.832	198.139	219.664	215.795	3.82724	4.40417	3.91411	3.33591	3.84706	6.42184	7.1832	7.15957	7.24216	7.48252
ENSMUST00000218843	1.38655e-06	0.00035277	8.25563	down	Yes	chr10	keratin associated protein 10-10 [Source:MGI Symbol;Acc:MGI:3645300]	ENSMUSG00000112223	Krtap10-10		chr10:77835947-77837252:+	NM_001024709	1306	CCCTTCCCTGTCCTCACCGCCCTCTACTCAGTATCTTGTGAAATAAAACGAGATTCTCAG	GENCODE	+			ASMM10AP1B100119411V4	77837252	77835947	protein_coding	1029.83	12978.2	10.2566	13.302	805.478	1170.46	848.168	1101.15	1223.93	7367.94	9097.11	20521.2	20899.6	7005.29	9.88904	10.3911	10.359	10.2773	10.3666	12.9198	13.3418	13.7521	13.8035	12.6927
ENSMUST00000170243	0.00103292	0.00967535	7.77308	down	Yes	chr18	polypeptide N-acetylgalactosaminyltransferase 1 [Source:MGI Symbol;Acc:MGI:894693]	ENSMUSG00000000420	Galnt1	Yes	chr18:24205767-24286810:+	NM_001160404	4108	CGCGCGGGCCGAGATGATTTGAGACATGTGGATTTGTGATATGAATTCATTTGGAAAGCC	GENCODE	+			ASMM10AP1B116360470V4	24286810	24205767	protein_coding	21.2114	175.82	4.24906	7.20755	21.6958	14.5905	5	29.4288	35.3419	183.775	182.652	210.676	187.352	114.645	4.51128	3.81796	2.33871	5.18209	5.39527	7.59634	7.66518	7.24644	7.00688	6.52291
ENSMUST00000151224	1.76564e-06	0.000383397	7.76629	down	Yes	chr2	family with sequence similarity 163, member B [Source:MGI Symbol;Acc:MGI:1926106]	ENSMUSG00000009216	Fam163b		chr2:27110380-27142491:-	NM_175427	2959	CTTCAAAGTGAATTAAGCATCTGTCCCTGCCACTCAACACCACCATGGGACTTGCCAGGG	GENCODE	-			ASMM10AP1B100077108V4	27142491	27110380	protein_coding	94.7108	1092.42	6.75482	9.71204	101.242	119.381	100.923	72.2162	79.7915	648.179	1022.48	1517.24	1636.23	637.977	6.7957	6.9301	7.05797	6.44818	6.54214	9.35972	10.0568	9.99813	10.0862	9.05938
ENSMUST00000102759	3.63905e-07	0.000203332	7.59971	down	Yes	chr2	signal transducing adaptor molecule (SH3 domain and ITAM motif) 2 [Source:MGI Symbol;Acc:MGI:1929100]	ENSMUSG00000055371	Stam2		chr2:52691664-52742200:-	NM_019667	4717	GAACTCGGTAACAGCACACACCGTCCAACCTCCATACTTAAGCACTGGACAGGACACTGT	GENCODE	-			ASMM10AP1B111371868V4	52742200	52691664	protein_coding	375.752	4026.82	8.74264	11.6686	346.001	334.976	266.682	378.894	552.205	2989.65	4011.03	4616.56	5604	2912.84	8.65397	8.39634	8.56187	8.83296	9.26805	11.5475	12.046	11.5627	11.8438	11.3429
ENSMUST00000115797	9.56517e-05	0.00286062	7.5145	down	Yes	chr17	AT rich interactive domain 1B (SWI-like) [Source:MGI Symbol;Acc:MGI:1926129]	ENSMUSG00000069729	Arid1b	Yes	chr17:4995074-5347656:+	NM_001085355	11325	TGGCAAAAAGTGCTAAGATAGAAAAATGTCACCACACTGGGTCAAAAACGTGAAAGGAAA	GENCODE	+		Yes	ASMM10AP1B115491875V4	5347656	4995074	protein_coding	9.16137	82.5844	3.21743	6.12711	5.60569	9.4503	5.25313	10.2994	15.1983	88.2266	108.666	69.6681	76.8909	69.4701	2.55317	3.15511	2.56239	3.6557	4.16079	6.56253	6.92595	5.65256	5.73433	5.76018
ENSMUST00000220377	2.94998e-07	0.000189706	7.20498	down	Yes	chr10	ubiquitin specific peptidase 15 [Source:MGI Symbol;Acc:MGI:101857]	ENSMUSG00000020124	Usp15	Yes	chr10:123105006-123196995:-	NM_027604	11525	TTGACGGCCTTATTTAGTCTTTTATTTCTTACTCTGAAACCACTGAAGTAAATCCAGTTT	GENCODE	-	Nucleus		ASMM10AP1B102780950V4	123196995	123105006	protein_coding	5.15141	43.2667	2.38254	5.23154	5	5.75703	5	5	5	42.7768	40.1275	56.4144	35.5766	41.4382	2.33259	2.53779	2.33871	2.35905	2.34458	5.59424	5.56148	5.34532	4.64881	5.00783
ENSMUST00000049285	0.00333063	0.0194103	7.18403	down	Yes	chr6	leucine rich repeat protein 1, neuronal [Source:MGI Symbol;Acc:MGI:106038]	ENSMUSG00000034648	Lrrn1		chr6:107529768-107570214:+	NM_008516	3700	CAAGCTAACAGGCAATAGAAATATGTATATCAGATTTTCTAATGTAATGAACTACATGGT	GENCODE	+	Cytoplasm		ASMM10AP1B100013501V4	107570214	107529768	protein_coding	25.5516	171.62	4.28073	7.12552	15.7814	13.1066	5	65.2651	28.6047	83.8891	135.819	241.826	208.194	188.374	4.0197	3.65389	2.33871	6.30624	5.08509	6.49178	7.25045	7.43551	7.16809	7.28177
ENSMUST00000032555	2.52008e-06	0.000463031	7.05252	down	Yes	chr7	translocase of outer mitochondrial membrane 40 [Source:MGI Symbol;Acc:MGI:1858259]	ENSMUSG00000002984	Tomm40		chr7:19701329-19715425:-	NM_001109748	1646	GGGTGTGCGTGTCGCCCCGATCCCTGCCCTCTGACCTTTCCCCTCGCAGATACCATGGGG	GENCODE	-			ASMM10AP1B121465847V4	19715425	19701329	protein_coding	1228.77	13231.6	10.5414	13.3595	1150.5	1534.2	1110.16	1072.96	1276.05	6884.49	10919.7	20342	20130.9	7881.16	10.4299	10.8173	10.7952	10.2437	10.4208	12.8104	13.6255	13.7304	13.7521	12.8791
ENSMUST00000195015	5.60196e-06	0.00067873	7.00519	down	Yes	chr1	transmembrane and coiled-coil domains 1 [Source:MGI Symbol;Acc:MGI:1921173]	ENSMUSG00000052428	Tmco1		chr1:167308378-167330785:+	NM_001039483	1573	TGAAGTCCAGCCACCGTGTGACAGGGTTCTAGTGTGAGGTAGGCGATCGGGCTCGGAGAG	GENCODE	+	Nucleus		ASMM10AP1B100074722V4	167330785	167308378	protein_coding	5.14504	43.9481	2.38884	5.19726	5.72522	5	5	5	5	31.0661	59.3726	45.4646	55.0938	28.7436	2.57122	2.33065	2.33871	2.35905	2.34458	5.15687	6.08238	5.02991	5.26315	4.45402
ENSMUST00000053640	4.03521e-05	0.0019064	7.00176	down	Yes	chr18	adrenergic receptor, beta 2 [Source:MGI Symbol;Acc:MGI:87938]	ENSMUSG00000045730	Adrb2		chr18:62177817-62179959:-	NM_007420	2143	CTCCACTTATTTACTCAAATGGAGTGTTGCAGGCAGGGATTTGAGGGACAACATCAGTTG	GENCODE	-		Yes	ASMM10AP1B100091799V4	62179959	62177817	protein_coding	8.08136	68.416	3.04848	5.8562	10.1154	6.91765	5	10.9317	7.4421	64.4452	92.1176	56.1473	71.3199	58.0502	3.34937	2.71781	2.33871	3.73863	3.09788	6.13269	6.69121	5.33649	5.62674	5.49385
ENSMUST00000046383	0.00054991	0.00690399	6.70669	down	Yes	chr3	tumor necrosis factor (ligand) superfamily, member 10 [Source:MGI Symbol;Acc:MGI:107414]	ENSMUSG00000039304	Tnfsf10		chr3:27317028-27339665:+	NM_009425	4993	TTGATACCATTTTGTGGGCTGGGAAATGTTAAACTTTGTAAACTCTGAAACGCACAAAGT	GENCODE	+			ASMM10AP1B100064654V4	27339665	27317028	protein_coding	396.265	3256.8	8.54084	11.2864	276.533	181.65	158.228	834.469	530.446	2192.05	3236.2	4239.18	4856.41	1760.18	8.31802	7.51311	7.75901	9.89797	9.21609	11.0907	11.7138	11.4346	11.6393	10.5537
ENSMUST00000023238	0.0174803	0.0558429	6.66788	down	Yes	chr15	gasdermin D [Source:MGI Symbol;Acc:MGI:1916396]	ENSMUSG00000022575	Gsdmd		chr15:75862327-75867408:+	NM_026960	1792	GCCCAGTGCTCCAGAACCAGAACCGGAGTGTTTTGGCTCCTTCAAAGTCTCTGATGTCGT	GENCODE	+			ASMM10AP1B118920587V4	75867408	75862327	protein_coding	18.2162	293.469	4.31869	7.05592	20.4419	13.6373	18.4423	21.8995	16.6598	31.4551	691.779	254.551	452.896	36.6642	4.41873	3.71225	4.42881	4.73934	4.29433	5.17477	9.51455	7.50396	8.26737	4.81896
ENSMUST00000122358	8.72246e-07	0.000294453	6.66251	down	Yes	chr14	transmembrane 9 superfamily member 1 [Source:MGI Symbol;Acc:MGI:1921390]	ENSMUSG00000002320	Tm9sf1		chr14:55635965-55643806:-	NM_028780	2517	AGGTCCCCGTCGGCGAAGGCGGAAGTGGTAAGACTGACGTGTCCGGGCTGCGGTGCTGCT	GENCODE	-			ASMM10AP1B124405805V4	55643806	55635965	protein_coding	131.049	1217.08	7.22109	9.95716	162.744	144.548	106.481	103.246	138.224	950.199	1558.95	1349.81	1286.69	939.736	7.51905	7.18756	7.1416	6.95726	7.29998	9.91707	10.6546	9.82595	9.75075	9.63741
ENSMUST00000163492	3.58037e-05	0.00181957	6.64551	down	No	chr17	solute carrier family 29 (nucleoside transporters), member 1 [Source:MGI Symbol;Acc:MGI:1927073]	ENSMUSG00000023942	Slc29a1		chr17:45585200-45592575:-	NM_022880	2216	GTGGTCCTGAGTCTGCAGAGGCTTCCCTTGCCTACTCTGTGTCCAGCTCTACCCCCCCCC	GENCODE	-			ASMM10AP1B127764562V4	45592575	45585200	protein_coding	680.501	7311.66	9.67131	12.4037	698.139	766.41	694.537	550.802	692.615	2568.82	7083.28	11047.7	11148.8	4709.71	9.68114	9.72657	10.043	9.32905	9.5768	11.3267	12.9048	12.8429	12.8768	12.0673
ENSMUST00000113769	5.31238e-06	0.000660646	6.5525	down	Yes	chrX	arrestin 3, retinal [Source:MGI Symbol;Acc:MGI:2159617]	ENSMUSG00000060890	Arr3		chrX:100605497-100618493:+	NM_133205	1359	AGGAGTTCACAGAGACAGTAGCTGCTAACTCCAGCTTCTCCCAGACCTTTGCAGTAACCC	GENCODE	+			ASMM10AP1B122488990V4	100618493	100605497	protein_coding	333.266	3310.11	8.59486	11.3069	284.309	309.621	284.765	356.657	430.98	1639.7	3467.55	4360.7	4911.94	2170.67	8.35825	8.27003	8.65913	8.75327	8.93363	10.6813	11.8313	11.4775	11.6561	10.8884
ENSMUST00000106407	3.04979e-06	0.00048334	6.51026	down	Yes	chr7	rabaptin, RAB GTPase binding effector protein 2 [Source:MGI Symbol;Acc:MGI:1917564]	ENSMUSG00000030727	Rabep2		chr7:126429066-126445901:+	NM_030566	2234	ACGGAGCGGGTCCAGCAGGAGCAGCGCAAGGCCCAGCTCACGGATCTCCTCTCAGAGCAG	GENCODE	+			ASMM10AP1B123448293V4	126445901	126429066	protein_coding	899.583	8048.17	9.98127	12.684	832.521	723.486	592.083	835.419	1514.41	5725.29	7827.19	9365.82	12152.3	5170.24	9.93234	9.63912	9.78672	9.89975	10.6484	12.5362	13.0763	12.5726	13.0092	12.2256
ENSMUST00000163643	2.92593e-06	0.000482883	6.29357	down	Yes	chr8	epidermal growth factor receptor pathway substrate 15-like 1 [Source:MGI Symbol;Acc:MGI:104582]	ENSMUSG00000006276	Eps15l1		chr8:72340999-72421460:-	NM_007944	3129	CCTCCGGCTTTGCCGACTTCACCTCTTTTGGCAATGAGGAGCAGCAATTGGCTTGGGCCA	GENCODE	-			ASMM10AP1B128157024V4	72421460	72340999	protein_coding	588.364	5152.38	9.34205	11.9959	510.394	447.708	345.634	716.817	921.269	3436.19	3819.94	7428.58	6909.52	4167.68	9.20377	8.86437	8.9695	9.69479	9.97781	11.7531	11.9727	12.2302	12.1382	11.8854
ENSMUST00000027036	3.45162e-05	0.00177573	5.85342	down	Yes	chr1	lysophospholipase 1 [Source:MGI Symbol;Acc:MGI:1344588]	ENSMUSG00000025903	Lypla1		chr1:4807823-4846739:+	NM_008866	2507	TGTTCTGTGAAGATGTGTTCAGGTAAGATGTAAGTGACTTCTTAGTTCTGTGAGTTAGAC	GENCODE	+			ASMM10AP1B108544378V4	4846739	4807823	protein_coding	352.547	2713.41	8.57538	11.1247	388.936	314.406	152.506	411.594	495.295	2930.99	2888.56	2918.1	2633.36	2196.01	8.82041	8.29579	7.69967	8.93681	9.1242	11.5188	11.5419	10.9046	10.7475	10.9105
ENSMUST00000018571	0.000430861	0.00613106	5.81629	down	Yes	chr11	yippee like 2 [Source:MGI Symbol;Acc:MGI:1925114]	ENSMUSG00000018427	Ypel2		chr11:86936425-86993707:-	NM_001005341	4847	TTCTGTCATTGCTGATCTGTGTTGGTGCTCATTTGAGAAAATAAAGTTTTCAAATACTAA	GENCODE	-			ASMM10AP1B100009450V4	86993707	86936425	protein_coding	806.712	5559.6	9.64028	12.1804	494.466	698.701	262.094	1411.51	1166.79	7285.88	4250.62	4353.74	6263.48	5644.29	9.16077	9.58762	8.5389	10.6122	10.3019	12.8973	12.1366	11.4745	12.0161	12.3773
ENSMUST00000051184	9.63423e-08	0.00010739	5.79457	down	Yes	chr14	potassium channel regulator [Source:MGI Symbol;Acc:MGI:2685591]	ENSMUSG00000046168	Kcnrg		chr14:61607482-61612826:+	NM_001039105	1766	TGTGGCTCCGATGGCGCTGCTGAGAACCAAGCTGGAGTCAGGTACATTTCCATAAAGCCT	GENCODE	+			ASMM10AP1B116952660V4	61612826	61607482	protein_coding	42.6199	343.361	5.59248	8.12718	41.2723	50.0823	40.9058	33.7514	47.0875	229.062	291.033	474.007	458.452	264.252	5.46656	5.65135	5.65855	5.3776	5.80835	7.9138	8.3001	8.36604	8.28438	7.77161
ENSMUST00000039026	0.000694598	0.00776316	5.77106	down	Yes	chrX	apelin [Source:MGI Symbol;Acc:MGI:1353624]	ENSMUSG00000037010	Apln		chrX:48025146-48034853:-	NM_013912	3149	AGTGGAGTTGCTTGATGAATGAGATAACCTGGAAAATAAACTTCGAGGAGTTCGATAGGA	GENCODE	-	Exosome		ASMM10AP1B100200362V4	48034853	48025146	protein_coding	1263.37	7640.95	10.1	12.6288	660.861	677.828	355.272	3000.2	1622.7	6143.43	5762.46	10180	10029.3	6089.57	9.59727	9.54328	9.00337	11.6064	10.7496	12.6323	12.614	12.7027	12.7027	12.4924
ENSMUST00000022358	2.51133e-06	0.000463031	5.75748	down	Yes	chr14	zinc finger SWIM-type containing 8 [Source:MGI Symbol;Acc:MGI:1919156]	ENSMUSG00000021819	Zswim8		chr14:20707552-20723619:+	NM_027996	6073	GCCTCGAGTCTCGCAGGCTGGCCACAATCCCCGCTCGCACCTCGCTGTTGGGTGAGGCCC	GENCODE	+			ASMM10AP1B120240394V4	20723619	20707552	protein_coding	72.0572	557.665	6.32325	8.84868	64.3499	60.7469	54.9733	72.7362	107.48	391.337	598.316	602.128	681.213	515.329	6.12427	5.94663	6.12964	6.45973	6.95596	8.65553	9.30828	8.69395	8.85121	8.73444
ENSMUST00000168419	9.13789e-07	0.000299579	5.73637	down	Yes	chr18	CNDP dipeptidase 2 (metallopeptidase M20 family) [Source:MGI Symbol;Acc:MGI:1913304]	ENSMUSG00000024644	Cndp2		chr18:84667470-84681996:-	NM_001289531	2088	AGCAGGTCTGACCCCATTGCTCTCTCTACTCAGAGTTTCCCCGGTCTGAAGTCAGCCTGA	GENCODE	-	Cytoplasm		ASMM10AP1B110929406V4	84681996	84667470	protein_coding	114.155	968.425	7.03171	9.55185	103.454	122.611	103.288	105.645	135.779	503.619	815.254	1368.86	1410.71	743.682	6.8264	6.96614	7.09545	6.99313	7.27746	9.00669	9.73825	9.84655	9.87778	9.28999
ENSMUST00000134794	0.00177945	0.0134814	5.71087	down	Yes	chr2	phosphotriesterase related [Source:MGI Symbol;Acc:MGI:107372]	ENSMUSG00000026730	Pter		chr2:12924092-13003455:+	NM_001305437	3571	ACAAAGGCCACAATTTAATTAATTCATGTTATAATGCAAAGAAAAAGAGAAATGCTTGCC	GENCODE	+			ASMM10AP1B114209055V4	13003455	12924092	protein_coding	40.9647	249.283	5.17512	7.68883	24.6529	25.3817	11.5554	72.5214	70.7119	200.371	195.619	348.997	313.601	187.828	4.69906	4.63771	3.70553	6.45496	6.37833	7.72006	7.76761	7.92946	7.75014	7.27688
ENSMUST00000048691	3.28338e-06	0.000503652	5.61319	down	Yes	chr17	patched domain containing 4 [Source:MGI Symbol;Acc:MGI:1920485]	ENSMUSG00000042256	Ptchd4		chr17:42315947-42505077:+	NM_028474	4226	CTGGAAAATGTAGCGAGTAAAATGAGCCATCTACCATTCACCATCTCGGCATCAAACAGC	GENCODE	+			ASMM10AP1B100184110V4	42505077	42315947	protein_coding	22.6795	175.269	4.65067	7.13949	25.3213	23.318	21.7339	16.971	26.0531	77.104	139.264	202.695	254.069	203.212	4.73711	4.51238	4.6786	4.37612	4.94915	6.37476	7.28263	7.19353	7.44881	7.39774
ENSMUST00000090070	1.45962e-06	0.00035277	5.57971	down	Yes	chr6	GTPase, IMAP family member 4 [Source:MGI Symbol;Acc:MGI:1349656]	ENSMUSG00000054435	Gimap4		chr6:48684582-48692060:+	NM_174990	1804	TGCATTTCCCTTGATAACCCTGCCCTATAGTGCTCACCCCCCCCGATGCCCAAATGCTCT	GENCODE	+			ASMM10AP1B120376154V4	48692060	48684582	protein_coding	901.779	7545.53	10.0699	12.5501	853.692	1143.98	709.033	886.371	915.817	4881.9	7166.88	10196.7	11088.3	4393.87	9.9661	10.3538	10.0767	9.98223	9.97062	12.2927	12.9182	12.7059	12.8651	11.9685
ENSMUST00000073391	9.37628e-05	0.0028433	5.57676	down	Yes	chr19	cytochrome P450, family 26, subfamily c, polypeptide 1 [Source:MGI Symbol;Acc:MGI:2679699]	ENSMUSG00000062432	Cyp26c1		chr19:37685581-37693398:+	NM_001105201	1747	TAGCTGATGCGTACACACCGGCCAATCTTCAGAGCCCTAGGTCCTCATCGCGCGTATATT	GENCODE	+			ASMM10AP1B100041455V4	37693398	37685581	protein_coding	12.7843	90.989	3.7139	6.19333	14.6803	15.5128	17.9988	5.63158	10.0981	51.3079	88.3185	113.924	143.075	58.3198	3.90924	3.90369	4.38805	2.8194	3.54913	5.83061	6.6331	6.37364	6.628	5.50129
ENSMUST00000109659	1.79042e-05	0.00126847	5.5732	down	No	chr11	dopa decarboxylase [Source:MGI Symbol;Acc:MGI:94876]	ENSMUSG00000020182	Ddc		chr11:11814103-11890408:-	NM_016672	1954	GTGCCTTTATCTGTCCTGAATTCCGGTATCTTCTGAATGGTGTGGAGTTTGCAGATTCCT	GENCODE	-			ASMM10AP1B118045666V4	11890408	11814103	protein_coding	20.805	150.59	4.51682	6.99533	16.6192	25.7466	19.0207	23.4065	19.2321	207.565	140.55	155.628	118.572	130.638	4.10244	4.66067	4.47831	4.83675	4.50594	7.77145	7.29622	6.83231	6.35243	6.72423
ENSMUST00000086056	5.17903e-07	0.000211203	5.49701	down	Yes	chr5	piwi-like RNA-mediated gene silencing 1 [Source:MGI Symbol;Acc:MGI:1928897]	ENSMUSG00000029423	Piwil1		chr5:128736174-128755474:+	NM_021311	4016	AGCTCTGCCACGTGTACTATAATTGGCCTGGAGTCATCCGAGTCCCTGCACCTTGCCAGT	GENCODE	+			ASMM10AP1B110236549V4	128755474	128736174	protein_coding	35.4937	271.22	5.31628	7.77493	37.3841	42.3748	39.4123	30.6489	27.6484	159.344	222.788	368.666	391.683	213.62	5.31164	5.39684	5.59983	5.24213	5.03097	7.39138	7.94782	8.0021	8.0645	7.46884
ENSMUST00000179873	4.94002e-05	0.00206019	5.48044	down	Yes	chr6	electron transfer flavoprotein beta subunit lysine methyltransferase [Source:MGI Symbol;Acc:MGI:2443575]	ENSMUSG00000039958	Etfbkmt		chr6:149141513-149151166:+	NM_001252096	1576	CCTGCACGTGAAGGGCGAGTTCCACTTGCTGATCGAATAAAGTCAGTATTGTTTCTTTGT	GENCODE	+			ASMM10AP1B104837099V4	149151166	149141513	protein_coding	7.67472	52.1047	3.01501	5.46931	9.66945	9.70427	5.11405	7.83814	6.0477	54.592	64.5926	58.7946	35.2443	47.2998	3.28021	3.19976	2.53895	3.26947	2.78667	5.91127	6.19822	5.40427	4.63551	5.19725
ENSMUST00000059555	5.73274e-06	0.000681089	5.46102	down	Yes	chr9	ubiquitin-conjugating enzyme E2Q family member 2 [Source:MGI Symbol;Acc:MGI:2388672]	ENSMUSG00000032307	Ube2q2		chr9:55148854-55207529:+	NM_180600	3456	AGACTCTTTGAGCAAAATTATGAAAGATACCTAAATTGGAGATCCTTAAATTTTTGCTGT	GENCODE	+			ASMM10AP1B119181990V4	55207529	55148854	protein_coding	28.2695	197.596	4.95437	7.40354	36.029	33.0187	23.1162	19.4209	29.7626	190.466	240.021	192.608	186.972	177.914	5.25792	5.03551	4.76939	4.56581	5.14321	7.6496	8.04951	7.12337	7.00474	7.19046
ENSMUST00000126214	6.71804e-06	0.000729745	5.4565	down	Yes	chr6	coiled-coil serine rich 1 [Source:MGI Symbol;Acc:MGI:3045354]	ENSMUSG00000039578	Ccser1		chr6:61180324-62382865:+	NM_183310	5657	GCGCGCCCCGCCCGCTCCCATCCTCGCTCAGAATGACTGACTGCGAAGCTCTGGCGGAGC	GENCODE	+			ASMM10AP1B100229647V4	62382865	61180324	protein_coding	466.596	3661.62	9.05523	11.5032	376.305	428.71	336.349	503.903	687.714	3112.07	3591.3	4791.6	4753.77	2059.38	8.77167	8.79743	8.92561	9.21355	9.56792	11.6079	11.8873	11.61	11.6097	10.8011
ENSMUST00000020258	0.000181411	0.00388373	5.42203	down	Yes	chr10	hect domain and RLD 4 [Source:MGI Symbol;Acc:MGI:1914595]	ENSMUSG00000020064	Herc4	Yes	chr10:63243911-63317874:+	NM_026101	3898	TCATACCGCATTAAAGGTTTTAGAAATATTGCATAGGGTAAATGAGAAAACAGGACAACT	GENCODE	+	Nucleus		ASMM10AP1B114821591V4	63317874	63243911	protein_coding	11.2679	70.2557	3.48154	5.92037	8.89858	15.1864	5	11.7841	15.4705	72.6824	72.7562	65.8978	69.6478	70.2942	3.15622	3.87477	2.33871	3.85011	4.18788	6.29781	6.36069	5.56977	5.59649	5.7771
ENSMUST00000029116	3.30663e-05	0.00175354	5.39565	down	Yes	chr2	protein-L-isoaspartate (D-aspartate) O-methyltransferase domain containing 2 [Source:MGI Symbol;Acc:MGI:1923927]	ENSMUSG00000027589	Pcmtd2		chr2:181837854-181857461:+	NM_153594	3569	AAACATATGGGTAAACACAAATGAATCAATAAAATCGTGTTACGACATTCTATTCTCAGT	GENCODE	+			ASMM10AP1B115043258V4	181857461	181837854	protein_coding	1274.52	8515.28	10.3762	12.808	1047.77	1019.4	495.625	1902.6	1907.21	7982.02	7580.03	10518.3	10499.6	5996.48	10.2756	10.1697	9.50885	10.978	10.949	13.0352	13.0184	12.7467	12.7705	12.4693
ENSMUST00000025778	0.000135838	0.00342145	5.30484	down	Yes	chr19	glycine decarboxylase [Source:MGI Symbol;Acc:MGI:1341155]	ENSMUSG00000024827	Gldc		chr19:30098449-30175418:-	NM_138595	3754	GCAGCATTTCCACTGCCCTTTGTGAAACCAGAGAACAAATTCTGGCCAACCATTGCCCGG	GENCODE	-			ASMM10AP1B102057765V4	30175418	30098449	protein_coding	28.2843	227.707	4.94684	7.35415	33.5839	36.4213	32.2396	18.1961	20.9808	89.954	145.375	346.488	424.576	132.139	5.15826	5.17876	5.28959	4.47093	4.63665	6.58827	7.34335	7.91947	8.17705	6.74261
ENSMUST00000026032	8.16614e-05	0.00263539	5.1912	down	Yes	chr19	polycomb group ring finger 6 [Source:MGI Symbol;Acc:MGI:1918291]	ENSMUSG00000025050	Pcgf6		chr19:47033619-47050845:-	NM_001360632	2098	GACACCGGACATTTTAAGCCATTGGAAAAGAAGTTTGTGCGTGTTTCAGGAGAAGCAACT	GENCODE	-	Nucleus	Yes	ASMM10AP1B101282483V4	47050845	47033619	protein_coding	9.07349	57.1275	3.23581	5.61188	13.4127	7.99049	5.7294	7.45158	10.7833	66.3255	61.9185	49.1737	45.4793	62.7406	3.77171	2.9106	2.65028	3.19892	3.64756	6.17441	6.14049	5.14343	4.99484	5.60623
ENSMUST00000113973	7.68763e-05	0.00258344	5.15683	down	Yes	chr19	lysine methyltransferase 5B [Source:MGI Symbol;Acc:MGI:2444557]	ENSMUSG00000045098	Kmt5b		chr19:3767421-3818302:+	NM_001167885	6130	AGGAGATTATAAATAATAGTGTAAGCACTGCATCAGTGGACGTCTTGGCTTATGTTAGTT	GENCODE	+		Yes	ASMM10AP1B112933753V4	3818302	3767421	protein_coding	22.8912	144.206	4.58568	6.95217	23.3662	27.1621	10.7298	22.6939	30.5041	160.006	149.657	141.523	147.262	122.584	4.61877	4.74339	3.59143	4.79673	5.17811	7.3966	7.38245	6.69479	6.66652	6.62049
ENSMUST00000107070	3.42754e-06	0.000516293	5.1543	down	Yes	chr3	PDZ domain containing 1 [Source:MGI Symbol;Acc:MGI:1928901]	ENSMUSG00000038298	Pdzk1		chr3:96832154-96870746:+	NM_001146001	2711	AGAGGCCAGAGCTTTGCAATAGGAACGATGACACCTTGCCTACCTGATCGCTGCTGAAGA	GENCODE	+			ASMM10AP1B113664622V4	96870746	96832154	protein_coding	34.2903	250.32	5.26528	7.63105	33.1083	37.7956	33.7491	26.446	40.3528	115.055	191.855	338.729	369.911	236.048	5.13642	5.231	5.35628	5.01799	5.58469	6.93261	7.74007	7.89196	7.98047	7.61016
ENSMUST00000085745	4.82133e-07	0.000206699	5.12044	down	Yes	chr12	WD repeat domain 35 [Source:MGI Symbol;Acc:MGI:1921932]	ENSMUSG00000066643	Wdr35		chr12:8973892-9028847:+	NM_172470	4501	TTGAAGAACTGATCAACTTCACCCCACACCAATTACACAGCCGCCCCATCGCCCGCGCAG	GENCODE	+	Nucleus		ASMM10AP1B100110031V4	9028847	8973892	protein_coding	86.3971	634.958	6.63759	8.99386	87.3284	97.0519	82.9759	80.8531	83.7761	455.764	611.527	732.759	939.523	435.218	6.57339	6.63154	6.75986	6.61187	6.61128	8.86885	9.33731	8.97124	9.31378	8.47811
ENSMUST00000044019	0.000365333	0.00562983	5.08172	down	Yes	chr6	solute carrier family 41, member 3 [Source:MGI Symbol;Acc:MGI:1918949]	ENSMUSG00000030089	Slc41a3		chr6:90604725-90646412:+	NM_027868	2412	TGAACTATTTCCAGCACTGGCCAGTGTTCAAAGATGTTAAAGACCTGATGACGTTGGTGC	GENCODE	+			ASMM10AP1B117512582V4	90646412	90604725	protein_coding	8.76587	58.3055	3.15968	5.50499	7.80651	10.3201	5	8.31622	12.3865	45.82	29.7357	45.8161	45.498	124.657	2.96364	3.2908	2.33871	3.35644	3.84879	5.67734	5.16257	5.04227	4.9952	6.6476
ENSMUST00000036884	7.01839e-05	0.00250743	5.02999	down	Yes	chr19	Kruppel-like factor 9 [Source:MGI Symbol;Acc:MGI:1333856]	ENSMUSG00000033863	Klf9		chr19:23141226-23166911:+	NM_010638	3263	TCACTAGCGCAGTGTTTTCTGTTTAACCAATGTAGTTGTATCAGTAGTTCTCTCAGAACT	GENCODE	+		Yes	ASMM10AP1B100089872V4	23166911	23141226	protein_coding	288.921	1877.19	8.25903	10.5896	289.638	318.773	112.108	273.315	450.77	1928.64	1665.47	2202.66	1778.6	1810.55	8.38378	8.31528	7.22209	8.38066	8.99334	10.906	10.7442	10.5018	10.1916	10.6043
ENSMUST00000000304	5.69634e-06	0.000681089	5.02079	down	Yes	chr10	HD domain containing 2 [Source:MGI Symbol;Acc:MGI:1916942]	ENSMUSG00000000295	Hddc2		chr10:31313383-31328204:+	NM_027168	858	TGACACCGCCCAGCTCTTATGCACTTCAGCATGGCTTTGGCCTCGTCCGGCTCTGGAGCC	GENCODE	+			ASMM10AP1B122939200V4	31328204	31313383	protein_coding	33.7579	234.417	5.23592	7.56383	34.2194	37.3572	41.2623	23.4749	32.4759	132.424	215.575	274.864	371.958	177.262	5.1857	5.21173	5.67162	4.84097	5.26955	7.13346	7.89945	7.60993	7.99011	7.1862
ENSMUST00000103194	0.00996412	0.0386006	5.00036	down	Yes	chr11	carbonic anhydrase 4 [Source:MGI Symbol;Acc:MGI:1096574]	ENSMUSG00000000805	Car4		chr11:84957788-84966044:+	NM_007607	1256	AGCCCCTGGTGGAAGCACTGCCCAGTATCTCCAAACCCCATTCAACCTCTACAGTGAGGG	GENCODE	+			ASMM10AP1B117156026V4	84966044	84957788	protein_coding	171.516	1722.92	7.58301	9.90504	232.798	226.339	117.282	142.726	138.433	335.94	2945.39	1947.15	3027.06	359.053	8.06534	7.81823	7.29359	7.43513	7.30274	8.44491	11.5705	10.337	10.9641	8.20857
ENSMUST00000032459	2.00646e-05	0.00131561	4.93269	down	Yes	chr6	vestigial like family member 4 [Source:MGI Symbol;Acc:MGI:2652840]	ENSMUSG00000030315	Vgll4	Yes	chr6:114861424-114921821:-	NM_177683	2028	GGACAAGATGAACAACAATATCGGCGTTCTGTGCTATGAAGGTGAAGCTTCCCTCAGGGG	GENCODE	-		Yes	ASMM10AP1B103830256V4	114921821	114861424	protein_coding	14.675	89.6575	3.95915	6.26152	20.1437	19.1699	10.4484	11.8635	11.7495	104.596	86.0678	77.0677	78.7014	101.854	4.39842	4.21618	3.54887	3.86193	3.77035	6.7979	6.59817	5.80047	5.76692	6.34417
ENSMUST00000120847	0.0227386	0.0666064	4.92757	down	Yes	chr5	leucine rich repeat containing 8D [Source:MGI Symbol;Acc:MGI:1922368]	ENSMUSG00000046079	Lrrc8d	Yes	chr5:105700789-105815210:+	NM_178701	3929	GAAGGAGAACTGCTTCGGGTCGAGGGGAGGAGAGGAAGTGCACTGCTGACTGCAACGTGC	GENCODE	+			ASMM10AP1B104884551V4	105815210	105700789	protein_coding	7.31031	71.1053	2.92629	5.22716	5.49623	12.1722	5.79397	7.65238	5.43679	13.8819	162.39	53.82	114.545	10.8902	2.53411	3.53898	2.6626	3.23423	2.66152	4.07196	7.49408	5.26805	6.30584	2.99589
ENSMUST00000049074	1.61693e-05	0.00119658	4.88301	down	Yes	chr4	protein tyrosine phosphatase, receptor type, F [Source:MGI Symbol;Acc:MGI:102695]	ENSMUSG00000033295	Ptprf	Yes	chr4:118208213-118291405:-	NM_011213	7656	GATGCGAAGGCTTAACTACCAGACCCCAGGTATGCGAGACCACCCGCCCATCCCCATCAC	GENCODE	-	Nucleus		ASMM10AP1B118378805V4	118291405	118208213	protein_coding	123.149	841.59	7.0979	9.38567	123.641	163.961	78.479	107.059	142.606	646.175	991.93	890.924	1174.54	504.385	7.09587	7.36471	6.67377	7.01241	7.34273	9.35491	10.0108	9.24631	9.61227	8.70409
ENSMUST00000118522	0.000174309	0.00381575	4.83508	down	Yes	chr16	PAX3 and PAX7 binding protein 1 [Source:MGI Symbol;Acc:MGI:1914617]	ENSMUSG00000022974	Paxbp1		chr16:91014037-91044543:-	NM_026110	3973	AGCCATTCAAATAAAGCTTTGATGGCACCAAATCTTGATTCCTTTGGACGTGATCGGGCA	GENCODE	-	Nucleus	Yes	ASMM10AP1B116512451V4	91044543	91014037	protein_coding	6.51826	35.2002	2.646	4.91954	8.36204	9.22924	5	5	5	40.8053	41.019	27.0207	26.6175	40.5385	3.06807	3.11961	2.33871	2.35905	2.34458	5.52949	5.5922	4.2749	4.22674	4.97439
ENSMUST00000091459	0.00113657	0.0102224	4.82295	down	No	chr13	family with sequence similarity 172, member A [Source:MGI Symbol;Acc:MGI:1915925]	ENSMUSG00000064138	Fam172a		chr13:77708690-78166235:+	NM_001163419	3892	GCATTAGACATTAATTACTTGAAATTTTTAATTAGTGAAGGTTATATCCAGTGCATGGTG	GENCODE	+			ASMM10AP1B108230209V4	78166235	77708690	protein_coding	26.4063	142.455	4.67499	6.9449	28.5475	19.8922	8.27008	39.9839	35.3377	147.351	131.384	156.112	140.32	137.109	4.91153	4.27203	3.17351	5.62282	5.39506	7.2874	7.20156	6.83749	6.60083	6.79724
ENSMUST00000111117	7.40063e-05	0.00254606	4.79517	down	Yes	chr1	CDC42 binding protein kinase alpha [Source:MGI Symbol;Acc:MGI:2441841]	ENSMUSG00000026490	Cdc42bpa	Yes	chr1:179960585-180165603:+	NM_001359546	9161	ATGATGCAACTGGATTCGTTTCAGGATTATGTTGCACGAATTGAATTTTGAATGAAGGAG	GENCODE	+	Cytoplasm		ASMM10AP1B100053461V4	180165603	179960585	protein_coding	5.98818	33.7364	2.58668	4.84826	9.81541	5	5	5	5.12548	26.8664	41.7108	34.1004	42.8567	23.1477	3.30408	2.33065	2.33871	2.35905	2.60089	4.96368	5.61194	4.6148	4.91244	4.13842
ENSMUST00000051079	0.000123759	0.00325329	4.77825	down	Yes	chr12	glycoprotein hormone beta 5 [Source:MGI Symbol;Acc:MGI:2156540]	ENSMUSG00000048982	Gphb5		chr12:75411722-75416781:-	NM_175644	1612	AGGAGCACCTGTACGATGTCAATAAAGTGTGGTCCCTGCCATCGGGATCCACGCAAACTT	GENCODE	-			ASMM10AP1B100108971V4	75416781	75411722	protein_coding	10.2245	57.4936	3.34147	5.59796	16.2341	11.3716	10.3558	8.16104	5	46.9737	53.8374	58.3512	85.7074	42.5983	4.0656	3.43668	3.53185	3.32866	2.34458	5.71044	5.95229	5.39412	5.88904	5.04389
ENSMUST00000184744	4.28255e-05	0.00194957	4.72851	down	Yes	chr14	potassium channel tetramerisation domain containing 12 [Source:MGI Symbol;Acc:MGI:2145823]	ENSMUSG00000098557	Kctd12		chr14:102976581-102982637:-	NM_177715	6057	TTTTAGCCCCAATTGTCTTCTTTTTCAAAGCAGAATCATATGTGTGTATACCTGCTGCTT	GENCODE	-			ASMM10AP1B117951896V4	102982637	102976581	protein_coding	46.1431	278.174	5.64906	7.89045	46.674	43.9648	25.972	54.8799	59.2251	267.179	315.088	286.492	241.466	280.644	5.65091	5.45516	4.95459	6.06049	6.12414	8.13098	8.4161	7.66729	7.37894	7.85892
ENSMUST00000096321	8.14843e-05	0.00263539	4.72828	down	Yes	chrX	armadillo repeat containing, X-linked 5 [Source:MGI Symbol;Acc:MGI:2148026]	ENSMUSG00000072969	Armcx5		chrX:135742733-135747322:+	NM_001009575	2779	GCTAAAGAGGTCTGTGTCAAATCCAGTGCTGGAGACAAAGCTAAAGAGGTCTGTGTCAAA	GENCODE	+	Nucleus		ASMM10AP1B110512672V4	135747322	135742733	protein_coding	11.7559	68.063	3.62537	5.86668	10.5069	12.1308	7.09054	14.4565	14.5949	71.1873	77.4102	65.2047	69.3509	57.1619	3.40695	3.5351	2.93271	4.15202	4.10006	6.26799	6.44993	5.55084	5.59143	5.47322
ENSMUST00000037585	0.000117934	0.00320227	4.70975	down	Yes	chr14	DENN/MADD domain containing 6A [Source:MGI Symbol;Acc:MGI:2442980]	ENSMUSG00000040818	Dennd6a		chr14:26579578-26634322:+	NM_001134465	6638	ACCTTGCCAAAAGTAGAATGAGATAGTTTGGTTTCAGATGGGAGTGTTGCAGAAGCCACT	GENCODE	+			ASMM10AP1B104048868V4	26634322	26579578	protein_coding	28.5986	167.786	4.93853	7.17418	32.4608	28.9762	14.5184	33.946	33.0915	190.385	186.853	151.523	144.869	165.298	5.1059	4.83649	4.06484	5.38591	5.29948	7.64912	7.70066	6.79535	6.64515	7.08061
ENSMUST00000176250	2.39975e-05	0.00147991	4.70445	down	No	chr9	neuroplastin [Source:MGI Symbol;Acc:MGI:108077]	ENSMUSG00000032336	Nptn	Yes	chr9:58629106-58655208:+		4531	TCAAAGTCTATACTCCACGGTTATGTTGCTAAGCTATAATGTTCCAGAGGTAGGTGGTTT	GENCODE	+	Nucleus		ASMM10AP1B111932497V4	58655208	58629106	protein_coding	5.67248	31.9113	2.55394	4.78797	5	6.07188	5	7.29052	5	29.2742	32.1696	42.9181	31.3984	23.7963	2.33259	2.58323	2.33871	3.17061	2.34458	5.07716	5.26386	4.94671	4.46753	4.18457
ENSMUST00000033427	1.2205e-06	0.000336142	4.6944	down	Yes	chrX	SAM and SH3 domain containing 3 [Source:MGI Symbol;Acc:MGI:1921381]	ENSMUSG00000031101	Sash3		chrX:48146436-48161565:+	NM_001313749	2677	AGCTGCAGAGCTGCTACTGGACTATGACACTGGCAGTGAAGAGGCTGAAGAGGGTGCTGA	GENCODE	+			ASMM10AP1B103028763V4	48161565	48146436	protein_coding	5.41164	31.6128	2.53812	4.76907	5	5	5	5.61763	6.44056	20.4019	28.4613	29.984	41.6771	37.5397	2.33259	2.33065	2.33871	2.81654	2.87214	4.58675	5.10322	4.42441	4.87375	4.85721
ENSMUST00000031678	0.000121073	0.00323377	4.68312	down	Yes	chr6	tetraspanin 12 [Source:MGI Symbol;Acc:MGI:1889818]	ENSMUSG00000029669	Tspan12		chr6:21771395-21852515:-	NM_173007	2490	TCTCTGGGGTGTCACTCTGGGAGTTAGCGACGCCGACGGTTGGAGAGAGGAAGACAAGGA	GENCODE	-			ASMM10AP1B106210373V4	21852515	21771395	protein_coding	5.94847	34.4669	2.66187	4.88934	7.21154	5	5	6.82961	5.70122	37.9224	45.432	29.0203	31.9724	27.9875	2.84407	2.33065	2.33871	3.08059	2.71533	5.42542	5.7333	4.37612	4.49627	4.4156
ENSMUST00000107762	5.74363e-06	0.000681089	4.66495	down	Yes	chr7	tubby-like protein 2 [Source:MGI Symbol;Acc:MGI:1861600]	ENSMUSG00000023467	Tulp2		chr7:45513706-45522594:+	NM_001045555	1883	TCCGCCTGCCCCAGTGCCCTGGGAGCATTACTCTGTTGGACATGGACCGTGAGGGGCCAA	GENCODE	+		Yes	ASMM10AP1B126659894V4	45522594	45513706	protein_coding	24.3811	147.75	4.74891	6.97077	22.4587	25.1129	33.8939	18.9523	21.4879	108.766	164.168	154.775	182.8	128.242	4.55972	4.62265	5.36338	4.52698	4.67183	6.8521	7.51133	6.825	6.97309	6.69234
ENSMUST00000087285	5.6105e-05	0.00223615	4.65501	down	Yes	chr4	forkhead box D3 [Source:MGI Symbol;Acc:MGI:1347473]	ENSMUSG00000067261	Foxd3		chr4:99656299-99658622:+	NM_010425	2324	ACTCTGCGCAGTTTTATCTGAGAAAAAGAATGTATAAAGACGTTGGGAGATTTTAAATCC	GENCODE	+		Yes	ASMM10AP1B100050030V4	99658622	99656299	protein_coding	15.8767	95.4576	4.08412	6.3029	14.9754	12.8089	13.0643	14.0298	24.5052	77.1953	85.8648	151.895	96.2158	66.1166	3.93901	3.61767	3.89875	4.10592	4.85924	6.37663	6.59476	6.79874	6.0566	5.68779
ENSMUST00000168361	0.000674529	0.00767033	4.65399	down	Yes	chr12	pumilio RNA-binding family member 2 [Source:MGI Symbol;Acc:MGI:1931751]	ENSMUSG00000020594	Pum2	Yes	chr12:8674681-8752581:+	NM_030723	6226	CCAGAGAAACGTTTGATCTGTGGATGAAATGAATCATGATTTTCAAGCTCTTGCATTAGA	GENCODE	+	Nucleus		ASMM10AP1B103570782V4	8752581	8674681	protein_coding	13.1373	69.4415	3.67519	5.89366	13.7464	10.7305	5	18.8244	17.3852	68.8796	60.7411	78.3364	81.5423	57.7083	3.80823	3.35229	2.33871	4.51865	4.35809	6.22639	6.11237	5.8247	5.81917	5.48569
ENSMUST00000072835	0.00092392	0.00909992	4.64198	down	Yes	chr18	coiled-coil domain containing 112 [Source:MGI Symbol;Acc:MGI:1918800]	ENSMUSG00000071855	Ccdc112		chr18:46282151-46311928:-	NM_001160399	2801	TGGAATTCTTTCTCGAGTGCCTTGTGAACTTAAAGGGGATAGTATATGACCAAGGCAACT	GENCODE	-			ASMM10AP1B100007910V4	46311928	46282151	protein_coding	18.2076	96.4728	4.1456	6.36034	19.5616	14.8003	6.17402	20.8697	29.6326	100.193	82.9003	103.01	118.56	77.7005	4.35145	3.8377	2.73407	4.66952	5.13524	6.74119	6.54411	6.23495	6.3523	5.92913
ENSMUST00000026607	0.000487582	0.00652526	4.64091	down	Yes	chrX	choroidermia (RAB escort protein 1) [Source:MGI Symbol;Acc:MGI:892979]	ENSMUSG00000025531	Chm		chrX:113040593-113185517:-	NM_018818	4868	ATACAGAAATCGAAGCAGAAAATGAACAGGTTGAAAAGCCAAGAATTCTATGGGCACTCT	GENCODE	-	Nucleus		ASMM10AP1B102084961V4	113185517	113040593	protein_coding	16.0811	87.6419	4.01236	6.22677	16.4104	18.0781	6.53673	14.5067	24.8735	88.0502	102.057	95.0112	81.2142	71.8772	4.08374	4.12843	2.80967	4.15628	4.88369	6.55915	6.8378	6.11007	5.81365	5.81318
ENSMUST00000047265	0.000477461	0.00645023	4.60316	down	Yes	chr8	testis expressed 45 [Source:MGI Symbol;Acc:MGI:1923656]	ENSMUSG00000040340	Tex45		chr8:3470862-3487178:+	NM_029598	1613	AGGAGCCAAGGTCAAGATTCATTAACCCAGTAAGGTAGAGCGGGGCCTCACGATGCCTGT	GENCODE	+			ASMM10AP1B104827611V4	3487178	3470862	protein_coding	5	29.3304	2.34112	4.54374	5	5	5	5	5	18.8012	55.2895	25.0594	30.6718	16.8301	2.33259	2.33065	2.33871	2.35905	2.34458	4.47654	5.98882	4.16236	4.43064	3.66035
ENSMUST00000061656	1.42734e-05	0.00112043	4.59094	down	Yes	chr15	RPTOR independent companion of MTOR, complex 2 [Source:MGI Symbol;Acc:MGI:1926007]	ENSMUSG00000050310	Rictor	Yes	chr15:6708383-6800401:+	NM_030168	9312	CGGCGGTTCATACAAGAGTTATTTCAGGATGTACAGTTTTTACAAATGCATGAAGAAGCA	GENCODE	+			ASMM10AP1B116180710V4	6800401	6708383	protein_coding	6.06006	32.0921	2.61742	4.81621	6.77062	6.9178	5	5	6.6119	32.516	35.486	32.9518	29.6655	29.8411	2.75952	2.718	2.33871	2.35905	2.91182	5.22267	5.40027	4.56364	4.38284	4.51162
ENSMUST00000199300	7.58665e-05	0.00257823	4.52739	down	No	chr3	calcium/calmodulin-dependent protein kinase II, delta [Source:MGI Symbol;Acc:MGI:1341265]	ENSMUSG00000053819	Camk2d	Yes	chr3:126597007-126846326:+	NM_001025438	5524	TCTGCTGACAATGTGTCCATTTTTATTTCTTAAGAAATACTCTATGTGTGGTGCCGGCCA	GENCODE	+			ASMM10AP1B112187567V4	126846326	126597007	protein_coding	23.2029	134.36	4.65975	6.83843	26.9386	19.9273	15.8125	26.8413	26.4945	136.133	173.01	132.493	120.63	109.534	4.82692	4.27447	4.18355	5.04095	4.97286	7.1758	7.58338	6.60125	6.37816	6.45355
ENSMUST00000022535	2.76519e-06	0.000482883	4.52369	down	Yes	chr14	decapping mRNA 1A [Source:MGI Symbol;Acc:MGI:1923151]	ENSMUSG00000021962	Dcp1a		chr14:30479612-30527063:+	NM_133761	5576	TTCCCCCAAAGAATGTCGTTTGAAATTTTCTCATTTCAGTAGTAGAGGCCGTAACTGCCA	GENCODE	+		Yes	ASMM10AP1B114086553V4	30527063	30479612	protein_coding	5.22353	28.0655	2.45081	4.62831	5.68122	5	5	5	5.43642	27.2229	26.927	30.5914	24.1955	31.3907	2.56423	2.33065	2.33871	2.35905	2.66141	4.98299	5.0281	4.45381	4.08613	4.59054
ENSMUST00000094917	1.44997e-06	0.00035277	4.50032	down	Yes	chr1	transmembrane protein 237 [Source:MGI Symbol;Acc:MGI:2138365]	ENSMUSG00000038079	Tmem237		chr1:59100590-59120094:-	NM_001033449	1869	CGCCGTGCCCACCCCCACGCAAACCACGATGACCTCCCGGGAAACTGTGGGTGAACCCCC	GENCODE	-			ASMM10AP1B123279532V4	59120094	59100590	protein_coding	124.114	775.209	7.15062	9.32065	109.907	136.205	117.156	110.279	147.025	586.336	891.85	784.896	975.627	637.336	6.91691	7.1024	7.29105	7.05797	7.38476	9.2333	9.87523	9.06892	9.36865	9.05714
ENSMUST00000046206	0.000154528	0.00362371	4.47792	down	Yes	chr18	regulation of nuclear pre-mRNA domain containing 1A [Source:MGI Symbol;Acc:MGI:2385066]	ENSMUSG00000040446	Rprd1a		chr18:24484962-24530204:-	NM_144861	4297	CAAGGCCTTGTGAGAAATTCCATGTTTCTATTTCTTCATGTATTTTCAATTACTTTTCTT	GENCODE	-	Nucleus		ASMM10AP1B100073682V4	24530204	24484962	protein_coding	57.2031	323.787	5.93178	8.09461	60.7411	59.9388	26.2317	61.3979	77.7063	354.706	355.771	345.725	286.185	276.546	6.03766	5.92642	4.97134	6.21976	6.50375	8.52454	8.57948	7.91608	7.61539	7.83757
ENSMUST00000216456	0.000322922	0.00529583	4.477	down	Yes	chr7	olfactory receptor 597 [Source:MGI Symbol;Acc:MGI:3030431]	ENSMUSG00000073952	Olfr597		chr7:103316315-103322799:+		2727	CACAGAGCCTGTATGGATCCGCACTAGGTCTCCTATATTTTATGCTTTTGTGGTTTTGTG	GENCODE	+			ASMM10AP1B100067226V4	103322799	103316315	protein_coding	216.635	1427.49	7.92489	10.0874	261.45	256.013	151.34	143.558	270.815	818.488	2431.12	1600.33	1466.66	820.843	8.23613	7.98646	7.68605	7.44304	8.27278	9.70735	11.3048	10.0607	9.93743	9.42683
ENSMUST00000027991	1.07081e-05	0.000989164	4.47124	down	Yes	chr1	regulator of G-protein signaling 4 [Source:MGI Symbol;Acc:MGI:108409]	ENSMUSG00000038530	Rgs4		chr1:169741477-169747642:-	NM_009062	2941	ATGGGCTGAATCGTTGGAAAACCTGATTCACCATGAATGTGGACTGGCAGCTTTCAAAGC	GENCODE	-			ASMM10AP1B100777773V4	169747642	169741477	protein_coding	12.9733	73.5678	3.81612	5.97679	15.1017	12.8525	10.3082	11.8992	14.7051	91.4639	64.8666	73.3135	64.7089	73.4862	3.95166	3.6235	3.5252	3.86716	4.11307	6.60936	6.20413	5.72801	5.49454	5.84793
ENSMUST00000088248	6.62585e-05	0.00242948	4.47081	down	Yes	chr2	ubiquitin-conjugating enzyme E2C [Source:MGI Symbol;Acc:MGI:1915862]	ENSMUSG00000001403	Ube2c		chr2:164769898-164772907:+	NM_026785	967	GCCCTTTGAACACACACGCTGCGGAACTCTGGAAAAACCCCACAGCATTTAAGAAATACC	GENCODE	+			ASMM10AP1B102672251V4	164772907	164769898	protein_coding	44.7397	306.601	5.66153	7.82207	52.6486	47.526	44.2765	46.1794	33.0681	133.201	187.653	516.139	494.901	201.109	5.82957	5.57639	5.78294	5.81986	5.29888	7.1452	7.70678	8.48377	8.39445	7.38013
ENSMUST00000034015	0.000196547	0.00402729	4.46976	down	Yes	chr8	methylsterol monoxygenase 1 [Source:MGI Symbol;Acc:MGI:1913484]	ENSMUSG00000031604	Msmo1		chr8:64718139-64733792:-	NM_025436	2044	AGAGTTTTTCAATATTCCTTATGATTGGGAAAGAATGCCAAGATGGTACTTAACTTTGGC	GENCODE	-	Nucleus		ASMM10AP1B112711258V4	64733792	64718139	protein_coding	46.4101	256.609	5.61508	7.77528	43.7285	42.4875	22.644	53.1558	70.0348	282.789	278.081	257.55	236.785	227.841	5.55267	5.40106	4.74024	6.01791	6.36353	8.20938	8.24104	7.52237	7.34836	7.55524
ENSMUST00000169345	1.29308e-05	0.00106337	4.46578	down	No	chr6	synapsin II [Source:MGI Symbol;Acc:MGI:103020]	ENSMUSG00000009394	Syn2		chr6:115134902-115276559:+	NM_013681	3854	TAGTCACGCCCTCGGCACCGCCCACTGCTCCCTCGCTAACAGGCTCGCTCCCCAGACCCA	GENCODE	+			ASMM10AP1B123786875V4	115276559	115134902	protein_coding	434.748	3058.45	9.01539	11.1743	437.183	481.831	422.258	395.316	437.153	1818.77	2869.79	4190.33	4739.75	1673.62	8.99384	8.99193	9.25447	8.88611	8.95062	10.8258	11.531	11.4204	11.6053	10.4889
ENSMUST00000100521	1.36079e-05	0.00109386	4.45816	down	No	chr11	src family associated phosphoprotein 1 [Source:MGI Symbol;Acc:MGI:1925723]	ENSMUSG00000057058	Skap1		chr11:96464593-96759130:+	NM_001177898	1539	TGTCCTTCCAACGGGGTGACCTCATCCGCATTCTGAGCAAGGGAACATATTCTCAGACCA	GENCODE	+			ASMM10AP1B105767353V4	96759130	96464593	protein_coding	8.92999	46.4207	3.17248	5.32893	11.5809	9.91868	9.36258	5	8.78781	35.6623	42.9179	56.7474	52.0192	44.7568	3.55553	3.23322	3.3701	2.35905	3.34453	5.34227	5.65523	5.35273	5.17876	5.11567
ENSMUST00000034030	1.64411e-05	0.00120568	4.44851	down	Yes	chr8	transmembrane protein 184C [Source:MGI Symbol;Acc:MGI:2384562]	ENSMUSG00000031617	Tmem184c		chr8:77595982-77610653:-	NM_145599	2678	GCCAGCGGCTAGTAAATCTTTTCCTATAGGGCGCCAGCGGAGAAGACAACCGAAAAAGCG	GENCODE	-	Nucleus		ASMM10AP1B104688490V4	77610653	77595982	protein_coding	5.16423	28.3882	2.48627	4.63959	5.14827	5.08516	5	5.58773	5	30.5747	30.6218	27.7731	25.3165	27.655	2.48424	2.45265	2.33871	2.81118	2.34458	5.13642	5.19765	4.31364	4.15362	4.39664
ENSMUST00000080141	0.0003339	0.00541494	4.43972	down	Yes	chr15	transmembrane protein 117 [Source:MGI Symbol;Acc:MGI:2444580]	ENSMUSG00000063296	Tmem117		chr15:94629250-95096098:+	NM_178789	2717	CCCTTCTTCCAGAAGATCTTCAAGGAGGAATACCGCATTCACATAACAGGTAAATGGTTT	GENCODE	+			ASMM10AP1B118665413V4	95096098	94629250	protein_coding	7.88411	42.1016	3.00811	5.15858	9.96862	11.0046	5	7.04983	6.39746	42.8842	59.6404	41.2974	29.0412	37.6446	3.32803	3.38836	2.33871	3.12379	2.86163	5.59804	6.08823	4.89133	4.35452	4.86076
ENSMUST00000121326	1.10711e-05	0.00101708	4.41947	down	Yes	chr3	serine/arginine-rich splicing factor 11 [Source:MGI Symbol;Acc:MGI:1916457]	ENSMUSG00000055436	Srsf11	Yes	chr3:158010473-158036639:-	NM_001093752	3106	GTAATCCGGGCCTTGCCCTAGCTGCGCGCGCTGATGTCGTCACCGCCAGCTCCCGGGACC	GENCODE	-	Nucleus		ASMM10AP1B121213998V4	158036639	158010473	protein_coding	38.831	249.139	5.45672	7.60059	42.9362	40.2655	40.6261	29.2092	41.1181	123.723	186.551	358.593	394.704	182.126	5.52502	5.327	5.6474	5.17091	5.61326	7.03834	7.6981	7.96462	8.07518	7.22671
ENSMUST00000061278	3.91874e-05	0.00188639	4.4061	down	Yes	chr17	vomeronasal 1 receptor 231 [Source:MGI Symbol;Acc:MGI:2159628]	ENSMUSG00000050933	Vmn1r231		chr17:20889716-20890651:-	NM_134196	936	TTATTGTGACCCAAGACACTGCTTTGCCCAGATTCAGCTTATCCTGGATAAGAAATACAG	GENCODE	-	Cytoplasm		ASMM10AP1B100015351V4	20890651	20889716	protein_coding	7.80604	40.4695	2.94403	5.08353	7.33732	14.1046	5.51531	7.07301	5	22.3021	28.3734	50.7037	50.4662	50.502	2.86745	3.76809	2.61298	3.12705	2.34458	4.7056	5.09873	5.18351	5.13374	5.29608
ENSMUST00000165684	5.99054e-06	0.000702159	4.40191	down	Yes	chr10	mediator complex subunit 16 [Source:MGI Symbol;Acc:MGI:2158394]	ENSMUSG00000013833	Med16		chr10:79894935-79908898:-	NM_198107	2950	CAGCATGTCCCTGCTCTTCCGACTGCTCACCAAACTGTGGATCTGCTGCCGTGATGAGGG	GENCODE	-	Cytoplasm	Yes	ASMM10AP1B122953130V4	79908898	79894935	protein_coding	156.138	1052.74	7.49735	9.63548	156.029	177.805	144.341	148.151	154.361	525.748	789.141	1578.3	1631.7	738.814	7.45334	7.47991	7.61722	7.48748	7.44881	9.07211	9.69958	10.0439	10.0818	9.27994
ENSMUST00000105397	3.38059e-05	0.00175354	4.40046	down	Yes	chr10	RIKEN cDNA 1810043G02 gene [Source:MGI Symbol;Acc:MGI:1915134]	ENSMUSG00000020284	1810043G02Rik		chr10:77978524-77985434:+	NM_026431	1818	CGCTTCCGCCCTCTCGCCTGACTGCCAATGGGACCTCAGGCTCCGCCCCTAGAAACGCGG	GENCODE	+	Cytoplasm		ASMM10AP1B100228882V4	77985434	77978524	protein_coding	226.75	1531.78	8.05383	10.1915	218.585	240.353	215.68	206.321	252.812	972.319	1659.03	1922.42	2333.25	771.864	7.97039	7.90254	8.23854	7.97998	8.17769	9.95521	10.741	10.3191	10.5932	9.34886
ENSMUST00000066743	0.0002683	0.00481119	4.39198	down	Yes	chr18	ADNP homeobox 2 [Source:MGI Symbol;Acc:MGI:2448562]	ENSMUSG00000053950	Adnp2		chr18:80126311-80151482:-	NM_175028	5012	TGAGGCAATTATTTGTGACTTGGTATACTCTGTTGTAAATTCAGAGCTTGTTGGACTTTA	GENCODE	-		Yes	ASMM10AP1B100058007V4	80151482	80126311	protein_coding	198.296	1138.7	7.72489	9.85976	199.821	135.924	93.812	279.72	282.205	1219.27	1088.18	1326.72	1295.49	763.821	7.82808	7.09914	6.94886	8.41122	8.33714	10.2695	10.144	9.79513	9.76163	9.32852
ENSMUST00000069965	4.38232e-05	0.001975	4.38491	down	Yes	chr10	cyclin-dependent kinase 17 [Source:MGI Symbol;Acc:MGI:97517]	ENSMUSG00000020015	Cdk17	Yes	chr10:93160890-93241328:+	NM_146239	3615	TGCAAAAGGACCCGGGTTTTCGAAACTCTTCTTATCCAGAGACAGGACATGGGAAGAACA	GENCODE	+	Nucleus		ASMM10AP1B118045789V4	93241328	93160890	protein_coding	9.06254	48.4342	3.25839	5.39094	12.0652	9.86267	9.14007	8.46964	5.77508	53.1457	52.1941	48.3136	38.4308	50.087	3.61883	3.22657	3.33174	3.384	2.73082	5.87649	5.913	5.12029	4.75879	5.28614
ENSMUST00000015394	0.00904196	0.0363409	4.3765	down	Yes	chr9	matrix metallopeptidase 13 [Source:MGI Symbol;Acc:MGI:1340026]	ENSMUSG00000050578	Mmp13		chr9:7272514-7283331:+	NM_008607	2673	GTGAAAAGCTATTGTGTCAAGAGACAGTGTTAATTAAACTGGGAAAATACAAAAGAACTG	GENCODE	+			ASMM10AP1B100193262V4	7283331	7272514	protein_coding	44.322	202.398	5.2006	7.33038	13.8952	19.7482	26.7808	114.286	46.8994	152.197	154.82	256.487	332.919	115.569	3.82705	4.26204	5.00392	7.1079	5.80208	7.33367	7.43278	7.51565	7.83591	6.53388
ENSMUST00000067947	0.000394031	0.00582853	4.37645	down	Yes	chr18	Rho-associated coiled-coil containing protein kinase 1 [Source:MGI Symbol;Acc:MGI:107927]	ENSMUSG00000024290	Rock1	Yes	chr18:10064401-10181792:-	NM_009071	6187	TGGAAAAACTAGTTAACCATGTGACCTACTGCTGTGTTGGAATCATGTGGGATGCTACCT	GENCODE	-	Nucleus	Yes	ASMM10AP1B103666463V4	10181792	10064401	protein_coding	26.428	147.252	4.81667	6.94643	30.2157	31.2175	13.2449	25.9119	31.5501	158.051	202.403	146.485	131.811	97.5081	5.00027	4.94626	3.92024	4.98843	5.22813	7.3833	7.81369	6.74837	6.51024	6.27656
ENSMUST00000159364	2.02895e-06	0.000403858	4.3744	down	Yes	chr8	Foxo1 corepressor [Source:MGI Symbol;Acc:MGI:1915484]	ENSMUSG00000089665	Fcor		chr8:3671188-3672362:-		392	AGCCTAATGTAACTCCCCCGCCTTCTACCTTCACTAGCAAGGACAATACAGAGTCATCTG	GENCODE	-			ASMM10AP1B100102077V4	3672362	3671188	protein_coding	267.2	1710.13	8.26776	10.3968	239.055	260.454	213.806	252.369	370.316	955.768	1461.34	2045.92	2486.46	1601.17	8.10469	8.00998	8.22577	8.27457	8.7238	9.93145	10.5618	10.4076	10.6679	10.4155
ENSMUST00000080626	9.04681e-06	0.000863897	4.37115	down	Yes	chr9	F-box and WD-40 domain protein 22 [Source:MGI Symbol;Acc:MGI:3643290]	ENSMUSG00000070324	Fbxw22		chr9:109378400-109404296:-	NM_001014395	1835	AGGAAATTCCAGTGAAGTTTGAATTTTGGGCACATCCATGTTATATCTCCAGGCATGGCT	GENCODE	-			ASMM10AP1B112261028V4	109404296	109378400	protein_coding	5	28.1045	2.34112	4.46913	5	5	5	5	5	11.9249	12.7595	35.7073	45.7278	34.4028	2.33259	2.33065	2.33871	2.35905	2.34458	3.87253	4.05927	4.6841	5.00166	4.72809
ENSMUST00000095063	3.83751e-05	0.00187612	4.36485	down	Yes	chr4	INTS3 and NABP interacting protein [Source:MGI Symbol;Acc:MGI:1913459]	ENSMUSG00000038544	Inip		chr4:59769637-59783866:-	NM_001013577	3237	TTTTATGAGGGAGTTACTTTGTAAGGATCCTGTCATTTTTCTGTACCCAAGGATTGAACC	GENCODE	-			ASMM10AP1B117690936V4	59783866	59769637	protein_coding	5.3705	28.412	2.50858	4.63451	5.24959	5	5	6.60291	5	29.1775	31.1366	32.0162	23.3805	26.3491	2.49815	2.33065	2.33871	3.0308	2.34458	5.07236	5.221	4.51724	4.03676	4.32519
ENSMUST00000019012	0.000615705	0.00730232	4.33841	down	Yes	chr15	patatin-like phospholipase domain containing 5 [Source:MGI Symbol;Acc:MGI:1923022]	ENSMUSG00000018868	Pnpla5		chr15:84112621-84123175:-	NM_029427	1694	AGCAGCGGGGGACAGCTCCTTCTGGGAACAGGCCCTTGAACCACAGGTGGTTTCCTGGCA	GENCODE	-			ASMM10AP1B129490887V4	84123175	84112621	protein_coding	373.312	1984.49	8.5165	10.6337	287.179	269.63	133.954	409.111	766.687	1294.34	1654.57	2276.73	2807.25	1889.55	8.3706	8.06332	7.49789	8.92872	9.72197	10.3598	10.7382	10.5458	10.8484	10.6762
ENSMUST00000089465	0.00310312	0.0185036	4.32858	down	Yes	chr15	apolipoprotein L 10B [Source:MGI Symbol;Acc:MGI:3043522]	ENSMUSG00000050014	Apol10b		chr15:77583819-77596125:-	NM_177820	2325	TTTCTAATTATCATGGAGTCCTTAATGTTGGCAGGGAGAACATTTCATGAAAGAGGAACT	GENCODE	-			ASMM10AP1B100193270V4	77596125	77583819	protein_coding	49.4979	254.439	5.5412	7.65509	32.5855	26.3642	21.1439	89.8598	77.5359	164.875	235.158	256.564	457.728	157.872	5.11237	4.69687	4.63537	6.76014	6.50126	7.44034	8.02214	7.51653	8.2821	7.01436
ENSMUST00000057019	0.000546383	0.00688434	4.3031	down	Yes	chr2	apelin receptor [Source:MGI Symbol;Acc:MGI:1346086]	ENSMUSG00000044338	Aplnr		chr2:85136225-85139923:+	NM_011784	3699	TCAGGCCAGAAACTTTCACACAGCTACTTTCTCCGCCAGGCCATTCTCAAAGCAGCCAGT	GENCODE	+	Cytoplasm		ASMM10AP1B101667774V4	85139923	85136225	protein_coding	145.994	790.802	7.23318	9.33856	126.79	99.2348	127.157	304.524	72.2651	537.484	722.466	1016.62	960.04	717.399	7.1306	6.66307	7.42305	8.54009	6.40909	9.1039	9.57081	9.43282	9.34765	9.23761
ENSMUST00000197992	0.000143213	0.00350076	4.28721	down	Yes	chr5	lipoma HMGIC fusion partner-like 3 [Source:MGI Symbol;Acc:MGI:1925076]	ENSMUSG00000106379	Lhfpl3		chr5:22746059-23275597:+	NM_001359998	3115	TGATGGAAATGCTTAAAGCAAACTAAGGTAGTATGAGACCTCACCATTTCTGTTAAGCCA	GENCODE	+			ASMM10AP1B118755614V4	23275597	22746059	protein_coding	8.4644	47.1961	3.09902	5.19906	8.79389	10.4687	8.3954	5	9.66402	16.6763	27.3139	57.7601	70.434	63.7961	3.13948	3.31389	3.19728	2.35905	3.48539	4.32615	5.04704	5.37965	5.60909	5.63336
ENSMUST00000066981	7.14422e-05	0.00252007	4.26742	down	No	chr17	uromodulin-like 1 [Source:MGI Symbol;Acc:MGI:1929785]	ENSMUSG00000054134	Umodl1		chr17:30954679-31010708:+		4662	AACTCAGCTCTCCTTATCAGCATGAGTCTCATAGTTGCCTGGCAGTGCGAGTCGCAGTCA	GENCODE	+	Cytoplasm		ASMM10AP1B122053486V4	31010708	30954679	protein_coding	20.4754	125.039	4.49393	6.5873	15.6057	22.9447	22.8379	18.2628	22.7258	51.6749	88.7956	191.156	197.232	96.3359	4.00142	4.4884	4.75089	4.47654	4.75242	5.84119	6.64073	7.11129	7.08854	6.25476
ENSMUST00000026270	5.42369e-05	0.00220107	4.23923	down	Yes	chr9	SAC1 suppressor of actin mutations 1-like (yeast) [Source:MGI Symbol;Acc:MGI:1933169]	ENSMUSG00000025240	Sacm1l	Yes	chr9:123529759-123592600:+	NM_001357485	3558	GGGAACCGGTGCCTTGAAGACTGACTTTACAAGAACTGGAAAAAGAACTCAGTTGGGACT	GENCODE	+	Nucleus		ASMM10AP1B110127308V4	123592600	123529759	protein_coding	40.393	222.998	5.4889	7.57271	43.2699	45.9066	26.801	37.8839	48.1038	253.525	254.573	200.005	180.212	226.674	5.53376	5.52363	5.00485	5.54449	5.83778	8.05831	8.12398	7.17676	6.95456	7.54992
ENSMUST00000111601	0.0123128	0.0441118	4.23425	down	Yes	chr2	leucine rich repeat containing 55 [Source:MGI Symbol;Acc:MGI:2685197]	ENSMUSG00000075224	Lrrc55		chr2:85188071-85196699:-	NM_001033346	2900	GCCAACCTTTGTATGGAAATTATTTTATAACCATGCACTTTTGTAACTGTGAAGAATTTT	GENCODE	-			ASMM10AP1B100058948V4	85196699	85188071	protein_coding	96.4395	390.061	6.23909	8.3212	42.1196	29.3502	33.6008	239.727	137.4	266.954	336.261	518.9	500.692	327.499	5.49695	4.85514	5.35005	8.20048	7.29283	8.12987	8.50271	8.49083	8.41165	8.07092
ENSMUST00000108229	0.000752731	0.00806773	4.22296	down	No	chr4	PNN interacting serine/arginine-rich [Source:MGI Symbol;Acc:MGI:1913875]	ENSMUSG00000028248	Pnisr		chr4:21848058-21871342:+		2922	TGCCCATGTAATTTTGGAATTATACTTTTGAGATCACTTCTGGGTGGGGAGTAACTCGTA	GENCODE	+	Nucleus		ASMM10AP1B118276295V4	21871342	21848058	protein_coding	12.5823	60.701	3.62616	5.70442	10.0534	14.2142	5	16.2457	17.3984	62.68	48.0124	76.4514	59.8874	56.4738	3.33897	3.78047	2.33871	4.31346	4.35921	6.09235	5.80208	5.79033	5.38174	5.45558
ENSMUST00000140076	0.0027818	0.0172961	4.2065	down	Yes	chr5	phosphoribosyl pyrophosphate amidotransferase [Source:MGI Symbol;Acc:MGI:2387203]	ENSMUSG00000029246	Ppat		chr5:76913276-76951578:-	NM_172146	3981	TTGAACCTGAAGATTACATGGAATGCAGCATCTGAGGATTCATTTTGTACAAGGACTGAC	GENCODE	-			ASMM10AP1B111061859V4	76951578	76913276	protein_coding	15.3194	73.9115	3.89169	5.96431	19.576	5.89416	8.62672	17.2367	25.2636	63.927	95.6854	69.5248	85.526	54.8942	4.35282	2.55682	3.2428	4.39842	4.90758	6.12181	6.74663	5.64993	5.8868	5.41635
ENSMUST00000029891	4.08859e-05	0.0019064	4.19866	down	Yes	chr4	transmembrane protein 68 [Source:MGI Symbol;Acc:MGI:1919348]	ENSMUSG00000028232	Tmem68		chr4:3549041-3574853:-	NM_028097	2690	GCAGAACTTGCCGAGTAGTAGCTGACCACTTTGTCTTTAAAATTCCAGGGTTCAGTTTAT	GENCODE	-	Nucleus		ASMM10AP1B109393192V4	3574853	3549041	protein_coding	29.3029	156.76	5.00297	7.0729	34.7613	38.0021	19.1807	25.5585	29.0121	182.397	161.481	146.858	125.573	167.49	5.21011	5.23914	4.49174	4.96859	5.10527	7.58715	7.48477	6.75264	6.43618	7.10375
ENSMUST00000120087	0.00621913	0.0286457	4.17279	down	Yes	chr6	sterile alpha motif domain containing 9-like [Source:MGI Symbol;Acc:MGI:1343184]	ENSMUSG00000047735	Samd9l		chr6:3372257-3399572:-	NM_010156	5330	TGAAAATTTGGGGAATAAATTTGAAGCTTGAACATGAGTGGACAAGTAACTCAACCAAAA	GENCODE	-			ASMM10AP1B114550106V4	3399572	3372257	protein_coding	14.2791	62.0408	3.66383	5.72484	11.8588	6.82846	5	23.8082	23.9001	43.441	77.9857	55.0367	64.0277	69.713	3.5895	2.70121	2.33871	4.86401	4.82573	5.61383	6.46185	5.3041	5.47874	5.7657
ENSMUST00000021803	4.76582e-05	0.00205858	4.17162	down	Yes	chr13	nucleoporin 153 [Source:MGI Symbol;Acc:MGI:2385621]	ENSMUSG00000021374	Nup153	Yes	chr13:46679905-46727940:-	NM_175749	6109	CTGGGACAGCTAATGCCAGTTCGGTTTTCCAATTTGGTAGCAGCACTACGAATTTCAACT	GENCODE	-	Nucleus		ASMM10AP1B117271912V4	46727940	46679905	protein_coding	37.3197	199.612	5.35967	7.42028	51.2166	37.2968	24.7748	31.6892	41.6214	210.97	233.531	190.989	180.561	182.009	5.79198	5.20913	4.87968	5.2876	5.62997	7.79794	8.01174	7.1093	6.9577	7.22472
ENSMUST00000058119	0.00341161	0.0197229	4.16723	down	Yes	chrX	adipocyte-related X-chromosome expressed sequence 2 [Source:MGI Symbol;Acc:MGI:1924226]	ENSMUSG00000048040	Arxes2		chrX:135993824-135995355:+	NM_029823	1532	GTTTAACATGAGATCGTATGTTCTAGTATGTTTAATGCCATTAAATAAATGCTAACTGCT	GENCODE	+	Nucleus		ASMM10AP1B100193066V4	135995355	135993824	protein_coding	44.178	201.204	5.34234	7.40142	29.2047	22.1016	18.5841	58.0591	92.9408	219.498	171.689	211.995	263.208	139.632	4.9471	4.42986	4.44066	6.14163	6.75242	7.85546	7.57279	7.25579	7.50065	6.82243
ENSMUST00000048102	3.98336e-07	0.000203332	4.16136	down	Yes	chr7	myosin, heavy polypeptide 14 [Source:MGI Symbol;Acc:MGI:1919210]	ENSMUSG00000030739	Myh14		chr7:44605803-44670843:-	NM_001271540	6457	GCCCTGGGCGCCGACCATGGCTGCAGTGACCATGTCCGTGTCTGGGAGGAAGGTAGCCTC	GENCODE	-	Nucleus		ASMM10AP1B121133386V4	44670843	44605803	protein_coding	129.882	739.771	7.19444	9.2515	147.04	152.388	88.1129	113.677	148.193	512.592	743.511	869.138	865.731	707.884	7.35938	7.26221	6.85576	7.09931	7.39555	9.03152	9.60994	9.20799	9.19719	9.21084
ENSMUST00000183468	2.04475e-05	0.00132512	4.14911	down	No	chr9	zinc finger protein 280D [Source:MGI Symbol;Acc:MGI:2384583]	ENSMUSG00000038535	Zfp280d	Yes	chr9:72360202-72363627:+		1834	TGTTTAGCCATGATTGTAAAAATGTTATTGTTTCAGGAAACAGCAAGACATAGTAGAGCT	GENCODE	+	Exosome	Yes	ASMM10AP1B107223914V4	72363627	72360202	protein_coding	5.918	29.8929	2.64275	4.69555	5	5	5	7.86062	6.72938	29.7713	19.7549	36.7897	36.5643	26.5844	2.33259	2.33065	2.33871	3.2738	2.93797	5.10152	4.62407	4.7249	4.68734	4.33991
ENSMUST00000114914	1.22636e-06	0.000336142	4.14004	down	Yes	chrX	ecto-NOX disulfide-thiol exchanger 2 [Source:MGI Symbol;Acc:MGI:2384799]	ENSMUSG00000031109	Enox2		chrX:49009707-49288212:-	NM_001271448	3936	ATTTCTCCAGTCGTCACTTATTTCTTAAATAGGTTAAATAAATTTCAAGGCAACAGCTGC	GENCODE	-			ASMM10AP1B100114829V4	49288212	49009707	protein_coding	5.78601	28.1828	2.56914	4.61878	6.66979	5.98382	5	5	6.27643	28.0285	19.7106	34.2351	34.0937	24.8461	2.74079	2.56926	2.33871	2.35905	2.83788	5.02186	4.62067	4.62087	4.58835	4.24217
ENSMUST00000004587	0.000104734	0.00300369	4.1377	down	Yes	chr7	C-type lectin domain family 11, member a [Source:MGI Symbol;Acc:MGI:1298219]	ENSMUSG00000004473	Clec11a		chr7:44302687-44306902:-	NM_009131	2978	CTTTCCCCAGCCCTTCTCCCACACCAGAGGACACTGTCACTTACATCTTGGGCCGCTTGG	GENCODE	-			ASMM10AP1B103497778V4	44306902	44302687	protein_coding	3782.62	21571.2	12.0157	14.0645	2578.86	2935.32	2280.68	5448.31	5669.93	9624.3	15636.9	36498.8	31773.6	14322.7	11.6204	11.7703	11.8829	12.3698	12.4349	13.3128	14.1426	14.6414	14.4551	13.7706
ENSMUST00000049994	1.63045e-06	0.000363483	4.11071	down	Yes	chr4	ribosomal modification protein rimK-like family member A [Source:MGI Symbol;Acc:MGI:3040686]	ENSMUSG00000048899	Rimkla		chr4:119465283-119492628:-	NM_177572	4097	CGGGGGCACCGGGGGAAAGCTGTTTTTCTGGCCAGAGACAAGCATCACCTCTCTGACATC	GENCODE	-			ASMM10AP1B106500668V4	119492628	119465283	protein_coding	6.22219	30.4709	2.64218	4.68156	7.73054	7.79268	5	5	5.58773	16.455	21.5778	41.0773	40.895	32.3492	2.94788	2.87353	2.33871	2.35905	2.69171	4.3042	4.74024	4.88335	4.8463	4.63372
ENSMUST00000187701	9.88489e-05	0.00289957	4.08361	down	Yes	chr6	maturin, neural progenitor differentiation regulator homolog (Xenopus) [Source:MGI Symbol;Acc:MGI:1915485]	ENSMUSG00000038065	Mturn		chr6:54681754-54701141:+	NM_001289741	503	ACGGAGGAGAAACGCAGCCTGCACTGTTTGTGTACCTTTTAAGTGTCCGGGTGAGGAAGA	GENCODE	+			ASMM10AP1B105579514V4	54701141	54681754	protein_coding	73.3619	382.892	6.29547	8.32531	103.405	67.3919	36.9945	61.5114	97.507	324.949	411.773	355.39	477.623	344.727	6.8255	6.10507	5.4996	6.22329	6.82388	8.39884	8.78256	7.95261	8.34441	8.14813
ENSMUST00000110876	9.60448e-05	0.00286062	4.08249	down	Yes	chr8	mcf.2 transforming sequence-like [Source:MGI Symbol;Acc:MGI:103263]	ENSMUSG00000031442	Mcf2l		chr8:12915893-13020509:+	NM_178076	5253	CCCCACGGCTTAGCCCCACCCGACAGCACCTCTGGTGCAGCGGAGGACGATCTTCTGGGG	GENCODE	+			ASMM10AP1B126936432V4	13020509	12915893	protein_coding	17.1044	92.5662	4.1737	6.20315	15.6407	18.2372	16.1413	9.70579	25.7971	45.2306	52.6967	122.506	140.204	102.193	4.00463	4.14246	4.21714	3.56846	4.93579	5.66054	5.9251	6.48141	6.59989	6.34878
ENSMUST00000028552	0.000443616	0.00622165	4.07598	down	Yes	chr2	katanin p80 subunit B like 1 [Source:MGI Symbol;Acc:MGI:1919675]	ENSMUSG00000027132	Katnbl1		chr2:112379211-112414240:+	NM_024254	2886	ACTGGTAATATAGCTAAGGATGTAGATGCTTATTTATTACAGCTGCATTGAAAGATTTCA	GENCODE	+			ASMM10AP1B110968453V4	112414240	112379211	protein_coding	35.8232	175.62	5.21162	7.23876	39.0473	29.2812	15.3042	44.5838	50.8996	169.386	179.659	194.083	177.075	157.894	5.38225	4.85277	4.13354	5.76821	5.92132	7.48252	7.63789	7.1317	6.92684	7.01486
ENSMUST00000160399	1.22117e-05	0.00105487	4.06392	down	No	chr10	enoyl Coenzyme A hydratase domain containing 1 [Source:MGI Symbol;Acc:MGI:1277169]	ENSMUSG00000019883	Echdc1		chr10:29313166-29345560:+	NM_001110195	1845	GCGCAGCGGAAGAAATGGCAAAATGTCTTTTGACTTCATCTCTGTCTGTAAGAACAAAAC	GENCODE	+	Nucleus		ASMM10AP1B113222439V4	29345560	29313166	protein_coding	11.3054	56.465	3.59084	5.61371	12.2066	10.5698	7.70544	13.0768	12.9682	53.0769	51.7725	65.1377	57.8004	54.5374	3.63631	3.32832	3.06551	4.00425	3.9198	5.87496	5.90247	5.54957	5.33487	5.40667
ENSMUST00000163030	0.000491691	0.00654023	4.0608	down	Yes	chr5	SET domain containing 1B [Source:MGI Symbol;Acc:MGI:2652820]	ENSMUSG00000038384	Setd1b		chr5:123142193-123168629:+	NM_001040398	8857	GTGTGTCTTGCTGTAAATATTTGTTCATACTTTTGTGAATTCAATACTATGTACCATTGT	GENCODE	+	Exosome	Yes	ASMM10AP1B100064473V4	123168629	123142193	protein_coding	536.003	2800.59	9.1119	11.1337	469.573	392.013	209.327	874.638	734.464	2640.78	2550.21	3733.54	3336.9	1741.52	9.09639	8.64758	8.1934	9.96469	9.65742	11.3677	11.3867	11.2628	11.1152	10.5359
ENSMUST00000202006	3.91953e-07	0.000203332	4.03965	down	Yes	chr5	myosin 1H [Source:MGI Symbol;Acc:MGI:1914674]	ENSMUSG00000066952	Myo1h		chr5:114314941-114364576:+	NM_001164573	4631	GGGAGAAGGGAGTACATGAAGAAGAGACAAGCAGCCACCAAGTTAGAAGCCCACTGGCGT	GENCODE	+	Cytoplasm		ASMM10AP1B107420424V4	114364576	114314941	protein_coding	45.4213	248.838	5.66994	7.68417	38.8869	61.3882	36.0432	45.2486	45.5394	163.183	193.283	313.025	341.385	233.314	5.37389	5.96181	5.46425	5.79011	5.75966	7.42461	7.75169	7.7839	7.86898	7.59167
ENSMUST00000017975	2.03126e-05	0.0013215	4.03923	down	Yes	chr17	RAB5A, member RAS oncogene family [Source:MGI Symbol;Acc:MGI:105926]	ENSMUSG00000017831	Rab5a		chr17:53479234-53507680:+	NM_025887	2366	CAGGAAACAAAGCTGACTTAGCAAATAAAAGAGCTGTTGACTTCCAGGAAGCACAGTCCT	GENCODE	+			ASMM10AP1B109966501V4	53507680	53479234	protein_coding	79.2455	436.224	6.49478	8.50886	90.164	96.3352	61.4385	74.2588	74.031	509.984	474.802	394.983	365.219	436.134	6.62455	6.62118	6.29844	6.48977	6.43999	9.02689	8.97398	8.10041	7.96083	8.4822
ENSMUST00000037044	0.000293651	0.00505128	4.02215	down	Yes	chr10	HECT domain and ankyrin repeat containing, E3 ubiquitin protein ligase 1 [Source:MGI Symbol;Acc:MGI:2446110]	ENSMUSG00000038822	Hace1		chr10:45577829-45712345:+	NM_172473	3785	TGATGTCAAGATTCATGCATATCATAAAAGCACAGCCATTTAAAGATCGATGTGAGTGGT	GENCODE	+	Nucleus		ASMM10AP1B114448449V4	45712345	45577829	protein_coding	8.12419	38.3579	3.04164	5.04961	6.90515	8.51595	5	7.19755	13.0023	32.9167	43.5836	40.9348	45.6742	28.6803	2.78688	3.00546	2.33871	3.15208	3.92507	5.23894	5.67985	4.87834	5.00014	4.45078
ENSMUST00000109686	0.000672052	0.00765965	4.02075	down	Yes	chr8	neuropilin (NRP) and tolloid (TLL)-like 2 [Source:MGI Symbol;Acc:MGI:1921763]	ENSMUSG00000036902	Neto2		chr8:85636588-85690973:-	NM_001357287	5610	TGGGTACTGTATCTTGAGTTTTGAGAATTATTTGAGTCTGAACCACTGTAAGAGAACAAG	GENCODE	-			ASMM10AP1B108806997V4	85690973	85636588	protein_coding	9.57426	44.7136	3.26311	5.27057	9.40026	9.50337	5	8.53799	15.4297	55.2053	42.4655	45.3572	34.7663	45.7738	3.23708	3.16437	2.33871	3.39207	4.18331	5.92605	5.6392	5.02581	4.61569	5.14612
ENSMUST00000033899	1.43871e-05	0.00112408	3.98466	down	Yes	chr8	collagen, type IV, alpha 2 [Source:MGI Symbol;Acc:MGI:88455]	ENSMUSG00000031503	Col4a2		chr8:11312805-11449287:+	NM_009932	6450	GCTGGGTGGCGGAGTTTGTGGATCGGATATTCATTCCTCATGCACACTGCAGCCGGGGAT	GENCODE	+			ASMM10AP1B110297320V4	11449287	11312805	protein_coding	47.6251	243.934	5.70713	7.70158	46.0892	45.4404	34.0273	72.4818	40.0869	235.058	188.811	279.508	242.608	273.687	5.63117	5.50531	5.36923	6.4544	5.57553	7.95014	7.71573	7.63584	7.38528	7.82093
ENSMUST00000110325	0.000905094	0.00901367	3.97501	down	Yes	chr2	transmembrane protein 87B [Source:MGI Symbol;Acc:MGI:1919727]	ENSMUSG00000014353	Tmem87b		chr2:128818118-128854261:+	NM_001355629	4807	TGTTTTAGCAGTTATTGACTCCATTTTTGTGTGGTTCATTTTTATAAGTTTGGCACAGAC	GENCODE	+	Nucleus		ASMM10AP1B105141564V4	128854261	128818118	protein_coding	12.3561	55.8164	3.60309	5.59405	13.575	10.244	5	15.4953	17.4664	52.3329	51.1921	64.2881	61.9422	49.3267	3.78891	3.27978	2.33871	4.24334	4.36471	5.85525	5.88821	5.53191	5.43135	5.26354
ENSMUST00000112238	8.60825e-05	0.00271688	3.97004	down	Yes	chr17	forkhead box N2 [Source:MGI Symbol;Acc:MGI:1347478]	ENSMUSG00000034998	Foxn2		chr17:88440711-88490533:+	NM_001355742	5085	GTAGCATAAAATCTTCTGAGTTTAACTGCCAATAGATGACCAGCCACAAGTGAACCACTT	GENCODE	+		Yes	ASMM10AP1B100199842V4	88490533	88440711	protein_coding	380.399	2002.25	8.69322	10.6824	376.94	361.283	168.531	483.461	511.779	2099.89	1911.65	2206.73	2133.97	1659.04	8.77445	8.51198	7.8571	9.15353	9.16901	11.0271	10.9526	10.5052	10.461	10.466
ENSMUST00000003121	1.77533e-07	0.00014135	3.9699	down	Yes	chr8	RAB8A, member RAS oncogene family [Source:MGI Symbol;Acc:MGI:96960]	ENSMUSG00000003037	Rab8a		chr8:72161200-72183904:+	NM_023126	4550	AAACCAACGTACCAGCAATAGTCACCTGCCCTCCCCTGGAGTCTCTGATGTACCATGTTT	GENCODE	+			ASMM10AP1B112342862V4	72183904	72161200	protein_coding	2700.6	15036.6	11.6475	13.6366	2842.74	2566.91	1916.57	3204.47	2972.32	10835.3	13547.2	19971.1	20720.8	10108.8	11.767	11.5718	11.6131	11.7178	11.5678	13.496	13.9133	13.7073	13.7912	13.2754
ENSMUST00000023171	0.000174159	0.00381575	3.95395	down	Yes	chr16	hes family bHLH transcription factor 1 [Source:MGI Symbol;Acc:MGI:104853]	ENSMUSG00000022528	Hes1		chr16:30065340-30067796:+	NM_008235	1468	TGGATGCACTTAAGAAAGATAGCTCCCGGCATTCCAAGCTAGAGAAGGCAGACATTCTGG	GENCODE	+		Yes	ASMM10AP1B106843923V4	30067796	30065340	protein_coding	26.3843	133.029	4.82903	6.81233	28.7737	21.0083	16.3562	32.1917	33.5917	113.696	154.712	154.911	147.461	94.3637	4.92297	4.35525	4.23799	5.30869	5.32027	6.91561	7.43148	6.82682	6.66847	6.21927
ENSMUST00000028071	2.36302e-05	0.00147473	3.95186	down	Yes	chr2	Bmi1 polycomb ring finger oncogene [Source:MGI Symbol;Acc:MGI:88174]	ENSMUSG00000026739	Bmi1		chr2:18677018-18686629:+	NM_007552	3594	GAGGCTTTTTACCCTTACTCAATTTGAAAATTGCTTAAGCTTAAATGATATTTCAGTCAA	GENCODE	+	Nucleus	Yes	ASMM10AP1B100172486V4	18686629	18677018	protein_coding	914.631	4912.02	9.99091	11.9734	846.983	792.239	460.565	1209.84	1263.53	4531.54	4431.38	5967.66	6306.82	3322.69	9.95805	9.78281	9.39222	10.4122	10.4092	12.1757	12.2053	11.9108	12.0265	11.5488
ENSMUST00000098843	6.50219e-06	0.000715284	3.93988	down	Yes	chr3	histone cluster 2, H3b [Source:MGI Symbol;Acc:MGI:2448351]	ENSMUSG00000074403	Hist2h3b		chr3:96268654-96269141:+	NM_178215	488	GTCTGCAAGCCGAAGTCGCAAAAATATGGCCCGTACGAAGCAGACCGCCCGCAAGTCCAC	GENCODE	+			ASMM10AP1B100101929V4	96269141	96268654	protein_coding	64.6315	344.965	6.21094	8.18909	72.6662	68.7387	62.9185	51.3234	67.5107	349.003	392.352	343.032	324.87	315.569	6.29858	6.13685	6.34145	5.96506	6.31273	8.49864	8.71429	7.90788	7.80314	8.02149
ENSMUST00000145167	0.000368227	0.0056473	3.93718	down	Yes	chr5	selenoprotein I [Source:MGI Symbol;Acc:MGI:107898]	ENSMUSG00000075703	Selenoi		chr5:30232581-30272427:+	NM_027652	6803	AGAGACCTATTCACTGCAATGATTATTGGGTGTGCATTATGTGTGACTCTTCCAATGAGT	GENCODE	+	Nucleus		ASMM10AP1B116309572V4	30272427	30232581	protein_coding	47.593	228.386	5.63463	7.61179	46.3782	41.7923	21.1753	70.89	57.7291	245.383	207.867	249.035	248.624	191.019	5.64161	5.37965	4.638	6.42168	6.09221	8.01279	7.8519	7.47486	7.41702	7.30239
ENSMUST00000161289	6.95371e-06	0.000729745	3.93514	down	Yes	chr8	carboxylesterase 4A [Source:MGI Symbol;Acc:MGI:2384581]	ENSMUSG00000060560	Ces4a		chr8:105131800-105150109:+	NM_146213	2433	CGGGGTGCTTCCAAAGCCTGTACCTAGAGATTGTCCTCAATAAAAACTATGTTGACTTGA	GENCODE	+			ASMM10AP1B100075452V4	105150109	105131800	protein_coding	13.3679	65.356	3.83543	5.81184	13.7645	17.955	10.8361	14.7494	9.5348	65.2825	49.814	71.6249	59.6047	80.4541	3.81079	4.11885	3.60375	4.1784	3.46534	6.15311	5.85188	5.69531	5.37551	5.9834
ENSMUST00000064703	1.91161e-05	0.00130155	3.92935	down	No	chr2	protein kinase inhibitor, gamma [Source:MGI Symbol;Acc:MGI:1343086]	ENSMUSG00000035268	Pkig		chr2:163658399-163726154:+	NM_001039391	1036	CGCGCCGGCGGCCGGGGCTCTACGAGGCGACAAGGCGGCAGACTTTCTGCACTGGCTAAT	GENCODE	+			ASMM10AP1B127174740V4	163726154	163658399	protein_coding	13.7398	67.3075	3.8804	5.85469	16.6524	13.7594	12.6772	8.45758	17.1523	63.3366	69.0549	67.8485	77.1649	59.1325	4.10592	3.72766	3.84906	3.38253	4.33682	6.10788	6.29276	5.61172	5.73945	5.52164
ENSMUST00000165965	2.17193e-05	0.00139137	3.91324	down	Yes	chr19	MAP/microtubule affinity regulating kinase 2 [Source:MGI Symbol;Acc:MGI:99638]	ENSMUSG00000024969	Mark2	Yes	chr19:7276759-7341433:-		2874	CCTCCAAGTTTGTCCGCAGGAACCTGAATGAACCTGAAAGCAAAGACCGAGTGGAGACGC	GENCODE	-			ASMM10AP1B125327457V4	7341433	7276759	protein_coding	6.02951	29.172	2.71371	4.68208	6.06708	5	5.32979	7.65471	6.09598	32.3739	23.7082	27.2713	30.4636	32.0429	2.62985	2.33065	2.57529	3.23451	2.79827	5.21742	4.86395	4.28747	4.42022	4.62132
ENSMUST00000022304	0.0069675	0.0307947	3.91161	down	Yes	chr14	thyroid hormone receptor beta [Source:MGI Symbol;Acc:MGI:98743]	ENSMUSG00000021779	Thrb	Yes	chr14:17981529-18038090:+	NM_009380	6200	CTTTTGTATGCGGATATTAAATTGTAATTATGAATATAGTGGACATAGGTACTCATAAGC	GENCODE	+		Yes	ASMM10AP1B100043931V4	18038090	17981529	protein_coding	605.756	2643.6	9.03941	11.0072	365.067	331.885	142.859	1072.31	1116.66	2398.55	1761	3718.03	3664.23	1676.17	8.73029	8.37993	7.59977	10.2427	10.2443	11.2193	10.82	11.2537	11.2523	10.4906
ENSMUST00000028635	0.000107131	0.00304113	3.90874	down	No	chr2	COP9 signalosome subunit 2 [Source:MGI Symbol;Acc:MGI:1330276]	ENSMUSG00000027206	Cops2		chr2:125831602-125859139:-	NM_001285513	2073	TCTCCACTTCTAAACAGATGGATTTACTGCAGGAATTTTATGAAACAACACTGGAAGCTT	GENCODE	-	Nucleus	Yes	ASMM10AP1B113380377V4	125859139	125831602	protein_coding	300.173	1557.06	8.36502	10.3317	318.063	272.285	142.242	364.808	403.466	1668.07	1573.64	1557.73	1570.04	1415.81	8.52692	8.08073	7.59349	8.78052	8.84343	10.704	10.672	10.0283	10.0215	10.2329
ENSMUST00000065482	0.0127418	0.045112	3.90771	down	Yes	chr3	myeloid/lymphoid or mixed-lineage leukemia; translocated to, 11 [Source:MGI Symbol;Acc:MGI:1929671]	ENSMUSG00000053192	Mllt11		chr3:95219135-95228677:-	NM_019914	1923	TGGTGCTGATGAATCTGCCAATTGAATTGTAGGTTTGTATGTATGTACGTACTTATTTAT	GENCODE	-		Yes	ASMM10AP1B100930078V4	95228677	95219135	protein_coding	27.7805	107.273	4.55212	6.51844	22.3939	13.7371	6.37615	52.8356	43.5597	112.49	93.2728	118.591	120.049	91.9626	4.55474	3.72509	2.77783	6.00935	5.69361	6.89939	6.70902	6.43274	6.37138	6.17969
ENSMUST00000024897	0.000368409	0.0056473	3.87345	down	Yes	chr17	vesicle-associated membrane protein, associated protein A [Source:MGI Symbol;Acc:MGI:1353561]	ENSMUSG00000024091	Vapa	Yes	chr17:65578327-65613555:-	NM_013933	3369	TGTGTTTGAAATGCCGAATGAAAATGATAAGCTGAATGATATGGAACCTAGCAAAGCTGT	GENCODE	-	Exosome		ASMM10AP1B112511650V4	65613555	65578327	protein_coding	110.994	538.9	6.86231	8.81593	100.897	90.6444	48.8001	140.764	173.864	562.029	521.383	585.988	571.543	453.557	6.79133	6.53741	5.94214	7.41596	7.62473	9.17181	9.1087	8.65943	8.60028	8.53945
ENSMUST00000022721	0.000168661	0.00378018	3.87057	down	Yes	chr14	ceroid-lipofuscinosis, neuronal 5 [Source:MGI Symbol;Acc:MGI:2442253]	ENSMUSG00000022125	Cln5		chr14:103070216-103077628:+	NM_001033242	2445	ACGGGACACTGTCAGTCGTTGCAACCATATCCGGAAACACATTTAACAAAGTGGCCGAGT	GENCODE	+	Nucleus		ASMM10AP1B102825821V4	103077628	103070216	protein_coding	18.9225	92.39	4.34651	6.29905	22.1723	21.6009	12.0307	15.3075	23.501	106.449	109.385	85.3741	80.9299	79.8128	4.54121	4.3943	3.76645	4.2294	4.80117	6.82284	6.93874	5.95148	5.80758	5.97462
ENSMUST00000185675	1.40671e-05	0.00110944	3.86998	down	Yes	chr9	glucuronyl C5-epimerase [Source:MGI Symbol;Acc:MGI:2136405]	ENSMUSG00000032252	Glce		chr9:62057248-62122610:-		4850	ATTCTTTCATTTGATTAAGGTATGGTCTGAATATGCGTTGTTTGGCAGCTCGGGTCAACT	GENCODE	-	Nucleus;Cytoplasm		ASMM10AP1B107088157V4	62122610	62057248	protein_coding	5.00361	22.6622	2.36768	4.32	5.01807	5	5	5	5	21.6477	25.3997	23.6692	23.2684	19.3261	2.46539	2.33065	2.33871	2.35905	2.34458	4.66633	4.95072	4.08422	4.02967	3.86907
ENSMUST00000029477	7.11091e-05	0.00252007	3.86118	down	Yes	chr3	solute carrier family 25 (mitochondrial carrier, phosphate carrier), member 24 [Source:MGI Symbol;Acc:MGI:1917160]	ENSMUSG00000040322	Slc25a24		chr3:109123149-109168457:+	NM_172685	3431	CATTCCTTACGCAGGCATTGATCTCGCTGTGTACGAGCTTTTGAAGTCTTATTGGCTGGA	GENCODE	+	Nucleus		ASMM10AP1B102414099V4	109168457	109123149	protein_coding	5.98597	26.9735	2.59659	4.54563	7.52268	7.39463	5	5	5.01252	19.6491	35.4406	26.8636	22.8301	30.0843	2.90758	2.80258	2.33871	2.35905	2.57503	4.53458	5.39839	4.26686	4.00472	4.52361
ENSMUST00000064196	0.0132495	0.0462306	3.85894	down	Yes	chrX	RIKEN cDNA B630019K06 gene [Source:MGI Symbol;Acc:MGI:2147918]	ENSMUSG00000052364	B630019K06Rik		chrX:8892382-8894964:+	NR_045448	2583	TTTTACTGTGACATTGATGTTCTTGTGAAAAATACAGCAAAAGACTAAATAAGTTCCCCA	GENCODE	+			ASMM10AP1B100159547V4	8894964	8892382	protein_coding	99.0011	401.969	6.39562	8.34383	64.6263	50.0257	23.3028	180.961	176.089	389.516	368.981	486.305	542.989	222.057	6.1329	5.6496	4.78172	7.77324	7.64065	8.64972	8.62708	8.39676	8.52594	7.51965
ENSMUST00000028511	0.000609957	0.00726256	3.85859	down	Yes	chr2	metaxin 2 [Source:MGI Symbol;Acc:MGI:1859652]	ENSMUSG00000027099	Mtx2	Yes	chr2:74825803-74878431:+	NM_016804	2950	GGCGTGGTTTTGGAGGGTAATGAAAATTTATTCTGATTTAATGTTTATAAGGTATATACA	GENCODE	+	Nucleus		ASMM10AP1B100197830V4	74878431	74825803	protein_coding	6.24367	27.4142	2.61345	4.56153	5	5	5	5	11.2183	35.007	20.2472	35.5689	23.5235	22.7246	2.33259	2.33065	2.33871	2.35905	3.70626	5.31781	4.65469	4.6786	4.0449	4.11163
ENSMUST00000014812	0.000168266	0.00377638	3.85569	down	No	chr5	checkpoint with forkhead and ring finger domains [Source:MGI Symbol;Acc:MGI:2444898]	ENSMUSG00000014668	Chfr		chr5:110135860-110171972:+	NM_001289580	3146	TCTTTTATTGAAATCACCTGTTATATTTGTTTGAAAACTGGTAACTTTTTGCTTCTCAGG	GENCODE	+	Nucleus		ASMM10AP1B100085665V4	110171972	110135860	protein_coding	409.851	2087.66	8.77283	10.7198	398.921	339.1	171.928	583.45	555.855	2025.09	1725.01	2304.03	2712.58	1671.6	8.86112	8.41512	7.89138	9.41857	9.27794	10.9695	10.7886	10.5598	10.794	10.4872
ENSMUST00000114261	8.71305e-06	0.000846989	3.84928	down	Yes	chr2	non-homologous end joining factor [Source:MGI Symbol;Acc:MGI:2442831]	ENSMUSG00000047617	Paxx		chr2:25459482-25461094:-	NM_153557	981	GGTACCCGGAAACAATGTCAACCTTGAGTACCGCCCATCGCCTCGTCCTTCCGTCCCTCC	GENCODE	-	Cytoplasm		ASMM10AP1B104101281V4	25461094	25459482	protein_coding	78.3885	429.554	6.48785	8.43243	79.8876	85.8066	85.3847	57.3892	83.4745	264.912	415.623	554.545	605.286	307.406	6.44237	6.46007	6.80534	6.12565	6.60579	8.11881	8.79458	8.58618	8.67717	7.98542
ENSMUST00000036917	0.000126593	0.00328161	3.82123	down	Yes	chr11	heart and neural crest derivatives expressed 1 [Source:MGI Symbol;Acc:MGI:103577]	ENSMUSG00000037335	Hand1		chr11:57828707-57832147:-	NM_008213	1904	AACCCGGTCTTTGGACGTCTGAACCCTTCTCCCTCGTTGCCTACAGAAACCTTCAAGAGG	GENCODE	-		Yes	ASMM10AP1B118468722V4	57832147	57828707	protein_coding	3271.58	16530.3	11.763	13.6971	2530.04	2460.79	1516.92	4149.97	5700.15	9621.64	8306.76	25703.3	24477	14542.7	11.5873	11.5045	11.2795	12.0039	12.4401	13.312	13.1919	14.1133	14.0786	13.7896
ENSMUST00000220069	7.41837e-05	0.00254692	3.81994	down	Yes	chr10	gap junction protein, alpha 1 [Source:MGI Symbol;Acc:MGI:95713]	ENSMUSG00000050953	Gja1		chr10:56379088-56390415:+		3182	TGGGCAACCTTGAACGGAGGTGCCCAGACATGGGTGACTGGAGCGCCTTGGGGAAGCTGC	GENCODE	+			ASMM10AP1B128105345V4	56390415	56379088	protein_coding	12.1725	59.6175	3.73356	5.66711	11.5786	11.9066	12.6465	13.5186	11.2123	61.6781	72.243	45.2752	65.4915	53.3996	3.55526	3.5096	3.84563	4.0521	3.7052	6.07456	6.35102	5.0223	5.51147	5.37618
ENSMUST00000040914	0.00140491	0.0117238	3.80874	down	Yes	chr13	histone cluster 1, H1c [Source:MGI Symbol;Acc:MGI:1931526]	ENSMUSG00000036181	Hist1h1c		chr13:23738808-23740367:+	NM_015786	1560	GTTAAATTGGCTATCTGTTGAAAGTGTATGCTTCTAATAAAAAGCGTTTAGTTTTCATTC	GENCODE	+		Yes	ASMM10AP1B100038984V4	23740367	23738808	protein_coding	8373.69	31574.8	12.889	14.8184	6411.06	4160.8	2189.02	14875.3	14232.2	30229.4	25646.4	38341.3	43312.1	20344.8	12.9081	12.2784	11.8206	13.7536	13.6845	15.1463	14.9362	14.74	14.9338	14.3355
ENSMUST00000038377	4.9951e-05	0.00207241	3.79227	down	Yes	chr10	B cell translocation gene 1, anti-proliferative [Source:MGI Symbol;Acc:MGI:88215]	ENSMUSG00000036478	Btg1		chr10:96617006-96622809:+	NM_007569	5001	TGACTGTATCAGGTTAAGATATAGTCTATTGGATGGATCATCTTATAATGGATGGATGAA	GENCODE	+		Yes	ASMM10AP1B103176294V4	96622809	96617006	protein_coding	37.902	188.471	5.4083	7.33137	41.2786	38.6159	27.4146	40.3676	41.8332	194.353	232.962	180.44	175.512	159.091	5.46683	5.26278	5.03903	5.63493	5.63795	7.67621	8.00887	7.03053	6.91601	7.02522
ENSMUST00000159688	0.00301148	0.0182138	3.7874	down	No	chr1	Fc receptor, IgG, low affinity IIb [Source:MGI Symbol;Acc:MGI:95499]	ENSMUSG00000026656	Fcgr2b		chr1:170960993-170976127:-		1084	TCCTTGGTCTATCTCAAGAAAAAGCAGGTTCCAGCTCTCCCAGGAAACCCTGATCACAGG	GENCODE	-			ASMM10AP1B114195329V4	170976127	170960993	protein_coding	1055.43	6785.11	10.2812	12.2024	1168.63	837.139	865.68	976.974	1428.71	2129.42	8822.67	9668.91	10505.7	2798.83	10.4514	9.86518	10.3899	10.1195	10.5798	11.0435	13.2885	12.6162	12.7771	11.2866
ENSMUST00000063879	0.000343264	0.00549857	3.78191	down	Yes	chr10	phospholipid phosphatase 2 [Source:MGI Symbol;Acc:MGI:1354945]	ENSMUSG00000052151	Plpp2		chr10:79526430-79533796:-	NM_015817	1654	GCCCTTTCGTCAAGCCCTGCCCTTTCCCTGGGTCCGGCAGTCTCCACCGCCATGTGATCC	GENCODE	-			ASMM10AP1B119951385V4	79533796	79526430	protein_coding	5280.87	24600.7	12.3962	14.3153	3124.75	3538.56	2410.83	8725.6	8604.59	12813.4	16478.2	38694.1	37396.4	17621.5	11.8971	12.0479	11.9632	13.0559	13.017	13.7697	14.2453	14.7492	14.7201	14.0923
ENSMUST00000014499	0.000264214	0.00477297	3.7749	down	Yes	chr2	anaphase promoting complex subunit 1 [Source:MGI Symbol;Acc:MGI:103097]	ENSMUSG00000014355	Anapc1	Yes	chr2:128610104-128687391:-	NM_008569	8942	TTAGCTGTCTGCATAAATTTGCAAAAGATTTTATGAATTATTTATCTGCACCCAATGCTT	GENCODE	-	Nucleus		ASMM10AP1B110770303V4	128687391	128610104	protein_coding	13.5735	61.863	3.81031	5.72675	14.071	9.94067	7.89863	17.2486	18.7084	58.6461	51.8309	76.3986	72.1199	50.3195	3.84618	3.23576	3.10274	4.39935	4.46753	6.00776	5.90365	5.78945	5.64052	5.29238
ENSMUST00000029738	0.000765042	0.00814907	3.77196	down	Yes	chr3	G protein-coupled receptor 89 [Source:MGI Symbol;Acc:MGI:1914799]	ENSMUSG00000028096	Gpr89		chr3:96868281-96905346:-	NM_026229	4598	CAGCTGATCTGTATGCTACAAAGGAAAGAATTGAATACTCGAAAACATTCAAGGGAAAGT	GENCODE	-			ASMM10AP1B108587632V4	96905346	96868281	protein_coding	58.16	265.64	5.9099	7.82521	57.6208	45.9342	24.8159	80.9157	81.5134	287.693	267.833	264.381	287.611	220.68	5.96101	5.52419	4.88195	6.61279	6.56956	8.23724	8.19392	7.55883	7.62352	7.51255
ENSMUST00000145598	0.00208381	0.0146208	3.76385	down	No	chr2	cysteine-serine-rich nuclear protein 3 [Source:MGI Symbol;Acc:MGI:1925021]	ENSMUSG00000044647	Csrnp3		chr2:65931865-66023484:+	NM_001290665	2566	AGCGTGTGCCGTGTGCCGTAGTCATTTAAAGTGCATGCAGGTACATGTGACAACGCCGCA	GENCODE	+		Yes	ASMM10AP1B104081489V4	66023484	65931865	protein_coding	8.62659	37.6888	3.05083	4.96303	5	6.01182	5	11.3249	15.7963	27.1827	23.6761	54.7406	54.7489	28.0956	2.33259	2.57331	2.33871	3.79216	4.21736	4.98073	4.86206	5.29608	5.25431	4.42198
ENSMUST00000105342	0.00101815	0.00960632	3.74587	down	Yes	chr10	transcription factor 3 [Source:MGI Symbol;Acc:MGI:98510]	ENSMUSG00000020167	Tcf3		chr10:80409547-80433643:-	NM_001164147	2928	AAGTCTCATGTCTGTTTCTGTTTCTAGAATTTATCGTCATATTTCATGGTCTACAAGGTT	GENCODE	-		Yes	ASMM10AP1B104390428V4	80433643	80409547	protein_coding	1027.53	4640.82	9.9914	11.8967	860.746	640.307	358.435	1888.25	1389.93	4391.51	4597.74	5779.56	5203.25	3232.05	9.98072	9.44884	9.0159	10.9689	10.5426	12.1255	12.2598	11.8666	11.7271	11.5045
ENSMUST00000161227	0.000519568	0.00667218	3.74316	down	No	chr6	LUC7-like 2 (S. cerevisiae) [Source:MGI Symbol;Acc:MGI:2183260]	ENSMUSG00000029823	Luc7l2	Yes	chr6:38551803-38609427:+	NM_001311099	2405	GCCTGGCATACTGCATAAATGGAAGCAGGGTACCGCGAGATACTACTCGTCAACGAATCA	GENCODE	+			ASMM10AP1B104613389V4	38609427	38551803	protein_coding	7.60653	34.3615	2.9835	4.88775	8.64863	5.89044	5	7.94241	10.5512	32.7873	40.6117	38.5286	36.9222	22.9579	3.11613	2.55666	2.33871	3.28998	3.61601	5.23283	5.57863	4.79592	4.70332	4.12807
ENSMUST00000044053	9.11307e-05	0.00281646	3.74181	down	Yes	chr10	SNF2 histone linker PHD RING helicase [Source:MGI Symbol;Acc:MGI:1917581]	ENSMUSG00000090112	Shprh		chr10:11149430-11217595:+	NM_001077707	9271	TGGCTTTTTAAAAATCATCATTGTACTGAATTCATTTCTTGTGTTCCTGTAACTAGTCAT	GENCODE	+		Yes	ASMM10AP1B109891171V4	11217595	11149430	protein_coding	101.433	494.273	6.79174	8.69548	114.006	102.192	50.7584	111.994	128.213	545.703	483.433	495.603	487.777	458.848	6.97362	6.70045	6.00239	7.08015	7.20208	9.12657	9.00041	8.4266	8.37177	8.55204
ENSMUST00000059851	0.00134086	0.0114209	3.73403	down	Yes	chr7	DCN1, defective in cullin neddylation 1, domain containing 3 (S. cerevisiae) [Source:MGI Symbol;Acc:MGI:2679003]	ENSMUSG00000048787	Dcun1d3		chr7:119852796-119895745:-	NM_001163703	5985	AATTCATCTGCAAAATAAAGGGCATTGGTATTAGGATTTAAGAAAAAGTCTGTGAAACAC	GENCODE	-			ASMM10AP1B100125887V4	119895745	119852796	protein_coding	11.2492	49.138	3.50159	5.40233	11.6772	11.7135	5	12.5382	15.3169	55.8193	50.2583	41.0879	40.129	58.3955	3.56719	3.48524	2.33871	3.94486	4.17197	5.94103	5.86356	4.88369	4.81925	5.50411
ENSMUST00000036719	0.00283767	0.0175455	3.72342	down	Yes	chr2	phosphatidylinositol-3,4,5-trisphosphate-dependent Rac exchange factor 1 [Source:MGI Symbol;Acc:MGI:3040696]	ENSMUSG00000039621	Prex1		chr2:166566342-166713832:-	NM_177782	6533	TATTGAAAAGGTTTAAGAGGTCATTATTTCCGTGTTAAAATCTAAAGGCTGTGAGATGTG	GENCODE	-		Yes	ASMM10AP1B104823442V4	166713832	166566342	protein_coding	14.848	60.7422	3.81613	5.71276	11.8641	8.61928	6.98299	28.7553	18.0181	63.3424	53.7203	66.5896	58.6971	61.3614	3.59	3.02364	2.90978	5.14666	4.41057	6.10798	5.94859	5.58389	5.35411	5.56922
ENSMUST00000029257	0.000155732	0.00362951	3.70699	down	Yes	chr3	ATPase, class VI, type 11B [Source:MGI Symbol;Acc:MGI:1923545]	ENSMUSG00000037400	Atp11b	Yes	chr3:35754134-35856276:+	NM_029570	4868	AAAGTGTTTGATCGACAGCTTCATCCTACAAGTACAGAAAAGGCACAGCTTGCTGAAGCT	GENCODE	+	Nucleus		ASMM10AP1B123690544V4	35856276	35754134	protein_coding	14.8259	67.9217	3.97502	5.86526	15.4423	17.5024	8.54327	14.6653	17.9761	74.6023	68.6406	76.2921	55.1401	64.9336	3.98762	4.08313	3.22546	4.17161	4.40726	6.33148	6.28406	5.78737	5.26513	5.65828
ENSMUST00000113734	1.21435e-05	0.00105487	3.70144	down	Yes	chr16	zinc finger and BTB domain containing 21 [Source:MGI Symbol;Acc:MGI:1927240]	ENSMUSG00000046962	Zbtb21		chr16:97947435-97962621:-	NM_175428	6010	CAGATGTTTAGTGAAATAAATAGGTCTTTCACCACTGTAAATCTTTAGATAGTAGAGATA	GENCODE	-		Yes	ASMM10AP1B100108731V4	97962621	97947435	protein_coding	20.9743	98.7177	4.50918	6.39727	22.1453	21.5045	13.1448	24.6548	23.4221	94.9727	79.094	117.311	112.993	89.2174	4.53963	4.38788	3.90729	4.91617	4.79494	6.66497	6.48188	6.41854	6.28376	6.1372
ENSMUST00000078717	1.24372e-05	0.00106097	3.69623	down	Yes	chr16	leucine rich repeat containing 58 [Source:MGI Symbol;Acc:MGI:2443542]	ENSMUSG00000034158	Lrrc58	Yes	chr16:37868389-37888858:+	NM_177093	8604	TATCACTGCTTATCTGTTTATTGAATTTATTGAATACACAACTCCAAACACTAAGCGTGT	GENCODE	+			ASMM10AP1B100149081V4	37888858	37868389	protein_coding	2642.12	12458.7	11.4917	13.3778	2160.05	2311.76	1209.96	3834.34	3694.5	11178.1	8745.44	16437.1	16848.9	9083.71	11.3419	11.4024	10.9411	11.9137	11.8595	13.5611	13.2737	13.4609	13.4927	13.1004
ENSMUST00000100561	2.42485e-07	0.000168735	3.69583	down	Yes	chr11	calcium channel, voltage-dependent, T type, alpha 1G subunit [Source:MGI Symbol;Acc:MGI:1201678]	ENSMUSG00000020866	Cacna1g		chr11:94408391-94474100:-	NM_009783	8125	AGCAGATGGCCGATCTAATGTTGGACGATGTAATTGCTTCCGGCAGCTCAGCCAGCGCTG	GENCODE	-			ASMM10AP1B118887247V4	94474100	94408391	protein_coding	5.11102	22.3485	2.42074	4.30663	5.23696	5	5.31816	5	5	19.2726	19.2234	26.9532	22.7786	23.5148	2.49641	2.33065	2.573	2.35905	2.34458	4.5085	4.58687	4.27121	4.00063	4.16596
ENSMUST00000103133	0.000520223	0.00667241	3.69381	down	Yes	chr11	SWI/SNF related, matrix associated, actin dependent regulator of chromatin, subfamily e, member 1 [Source:MGI Symbol;Acc:MGI:1927347]	ENSMUSG00000037935	Smarce1		chr11:99209047-99231017:-	NM_020618	2919	GGTTTTAATGGTGTTATGTGGTCTGTGTATTAATTATTTACTTTTCCGTTGATACAACAT	GENCODE	-	Cytoplasm;Nucleus	Yes	ASMM10AP1B103186511V4	99231017	99209047	protein_coding	130.41	613.282	7.11487	8.99998	142.54	115.764	54.5182	158.319	180.907	717.399	617.202	632.472	592.932	506.405	7.30927	6.88377	6.11738	7.58225	7.68166	9.52	9.35121	8.76769	8.64821	8.71278
ENSMUST00000036554	0.000175432	0.00381948	3.68032	down	Yes	chr14	ATP-binding cassette, sub-family C (CFTR/MRP), member 4 [Source:MGI Symbol;Acc:MGI:2443111]	ENSMUSG00000032849	Abcc4		chr14:118482692-118706205:-	NM_001163675	5715	GTCTTACCTGATTTTGGGAATTTTTACGTTAATTGAGGAGGGCACTCGAGTAGTTCAGCC	GENCODE	-			ASMM10AP1B105517653V4	118706205	118482692	protein_coding	6.33119	28.0932	2.73893	4.61876	5	5.80292	5	7.42218	8.43084	28.4827	27.6402	30.4974	32.4283	21.4175	2.33259	2.54406	2.33871	3.19352	3.28576	5.04227	5.06287	4.44828	4.51671	4.02367
ENSMUST00000026211	0.00170612	0.0130958	3.67956	down	Yes	chr19	cytochrome P450, family 2, subfamily c, polypeptide 23 [Source:MGI Symbol;Acc:MGI:1888897]	ENSMUSG00000025197	Cyp2c23		chr19:44005022-44029199:-	NM_001001446	1916	TGGCTGCTTCAAGAAAACAGACTACTTTGTTCCTTTCTCCCTCGGGAAGCGATCCTGTGT	GENCODE	-			ASMM10AP1B111733651V4	44029199	44005022	protein_coding	78.1253	500.612	6.4753	8.35484	68.0652	81.5887	69.1122	70.6599	101.201	165.286	217.725	891.192	954.293	274.564	6.21084	6.38855	6.48555	6.41728	6.8743	7.44426	7.9174	9.24754	9.33956	7.82541
ENSMUST00000015138	0.000380375	0.00573664	3.67858	down	Yes	chr5	elastin [Source:MGI Symbol;Acc:MGI:95317]	ENSMUSG00000029675	Eln		chr5:134702593-134747323:-	NM_007925	3853	ATCCTCAGGAGAAAATTCATTTTAATCGCTTTGGTATAACTCTGGATGAAACACACATTT	GENCODE	-			ASMM10AP1B100037494V4	134747323	134702593	protein_coding	800.932	3645.64	9.67934	11.5585	622.285	515.831	421.005	1702.84	742.706	3712.87	3031.97	4133.07	4236.74	3113.54	9.51049	9.1087	9.25017	10.8536	9.67374	11.8649	11.6131	11.4033	11.4685	11.4426
ENSMUST00000040647	3.35904e-05	0.00175354	3.67072	down	Yes	chr18	fibroblast growth factor 1 [Source:MGI Symbol;Acc:MGI:95515]	ENSMUSG00000036585	Fgf1		chr18:38838673-38918771:-	NM_010197	3981	GGCCAGCAACCTGATGTGCATGCCACAGCCCGTCCCTCTCCCCACACAGAGCTGCAGAAA	GENCODE	-			ASMM10AP1B120539751V4	38918771	38838673	protein_coding	3502.55	17157.4	11.9314	13.8075	2668.74	2723.31	2271.44	4256.35	5592.9	10317	15709.5	23860.3	25313.9	10586.2	11.6718	11.6571	11.8774	12.0385	12.4122	13.4127	14.1527	14.0032	14.1285	13.3404
ENSMUST00000034787	0.000273849	0.0048814	3.66759	down	Yes	chr9	pleckstrin homology domain interacting protein [Source:MGI Symbol;Acc:MGI:1932404]	ENSMUSG00000032253	Phip	Yes	chr9:82866159-82975516:-	NM_001081216	10756	CTTAGAGAAAATGTTTAAGTGGTTAAAGGATTCAAGGACAATACAGGAAACATGTATGGA	GENCODE	-	Nucleus		ASMM10AP1B102284294V4	82975516	82866159	protein_coding	33.8731	156.808	5.19067	7.0655	36.1105	32.7777	18.0219	41.712	40.7435	151.61	184.515	132.918	183.81	131.186	5.26051	5.02336	4.39047	5.67945	5.59954	7.32724	7.68249	6.6064	6.98044	6.73093
ENSMUST00000077303	9.14118e-05	0.00281994	3.66603	down	Yes	chr2	protein tyrosine phosphatase, receptor type, A [Source:MGI Symbol;Acc:MGI:97808]	ENSMUSG00000027303	Ptpra	Yes	chr2:130450544-130554023:+	NM_008980	3066	CCGCTATGTAAACATCCTGCCCTTTCTCTCTTTAGCTGTGAGCAAGGATGCAGTGAAAGC	GENCODE	+	Nucleus		ASMM10AP1B106139855V4	130554023	130450544	protein_coding	79.2998	452.4	6.51559	8.38981	82.0857	82.6372	75.1338	79.1895	77.453	204.593	322.941	708.251	747.008	279.206	6.48044	6.40862	6.60624	6.58231	6.50035	7.75283	8.44908	8.92339	8.97328	7.85048
ENSMUST00000091420	0.000674824	0.00767033	3.66058	down	Yes	chr2	SKI/DACH domain containing 1 [Source:MGI Symbol;Acc:MGI:1919918]	ENSMUSG00000054074	Skida1		chr2:18044083-18049051:-	NM_028317	4376	AGTGACAATCAGAGGTGACTATCTATATTTGCACTTAAAATCAAAGTAGTTCCACAGGCA	GENCODE	-		Yes	ASMM10AP1B116220480V4	18049051	18044083	protein_coding	67.8664	324.238	6.18888	8.06095	73.3447	51.139	41.8688	111.88	61.0995	310.395	403.173	373.002	340.308	194.31	6.3134	5.68639	5.6933	7.07889	6.17241	8.33882	8.75056	8.02196	7.86618	7.32724
ENSMUST00000045737	1.90804e-05	0.00130155	3.65424	down	Yes	chr5	polypeptide N-acetylgalactosaminyltransferase 11 [Source:MGI Symbol;Acc:MGI:2444392]	ENSMUSG00000038072	Galnt11		chr5:25222882-25265918:+	NM_144908	2552	GCGGGTGTCGCGGAAACTGAAAATGGCCTTTGAGCTATGCTAGGTCTATAATGGGAAGCA	GENCODE	+	Nucleus		ASMM10AP1B115223849V4	25265918	25222882	protein_coding	5.35257	23.3414	2.49297	4.36254	6.40136	5	5	5.36148	5	22.2207	23.9338	24.9703	26.2143	19.3678	2.6882	2.33065	2.33871	2.76269	2.34458	4.70176	4.87654	4.1566	4.20583	3.87197
ENSMUST00000121391	0.0455294	0.107203	3.65211	down	Yes	chr4	crystallin beta-gamma domain containing 2 [Source:MGI Symbol;Acc:MGI:1334463]	ENSMUSG00000012123	Crybg2		chr4:134068452-134092504:+	NM_001162970	4761	TTCCCTGTGGCCTTGCTGAAGCCCATGGGACCTTCCAAACATCTGACTCCTGGGATATCA	GENCODE	+			ASMM10AP1B100026165V4	134092504	134068452	protein_coding	2923.02	9941.8	10.8696	12.7383	793.401	736.201	548.116	7137.52	5399.86	4621.77	3173.8	17138.3	17694.7	7080.44	9.86708	9.66456	9.67152	12.7914	12.3533	12.2053	11.6866	13.523	13.5645	12.712
ENSMUST00000030868	0.00302677	0.0182501	3.64422	down	Yes	chr5	sema domain, immunoglobulin domain (Ig), short basic domain, secreted, (semaphorin) 3D [Source:MGI Symbol;Acc:MGI:1860118]	ENSMUSG00000040254	Sema3d		chr5:12383385-12588948:+	NM_028882	6307	AGCATACCTTTTTGGGAAAGAAAAATAAAACCTGTCAGAAGCCACAGTTGGTCTTCACTT	GENCODE	+			ASMM10AP1B119332015V4	12588948	12383385	protein_coding	52.4143	214.925	5.65902	7.52463	41.285	28.2517	23.035	71.1865	98.3133	181.479	234.242	250.16	205.545	203.201	5.46739	4.79995	4.76358	6.42872	6.83547	7.57948	8.01807	7.48078	7.14722	7.39761
ENSMUST00000027517	0.00184958	0.0137807	3.64338	down	Yes	chr1	diacylglycerol kinase, delta [Source:MGI Symbol;Acc:MGI:2138334]	ENSMUSG00000070738	Dgkd	Yes	chr1:87853287-87944490:+	NM_177646	5695	TAATGCTGATCCCTTTAATGCTGAACCTGAAAACCTAGAATACTACACAGAGAAGTGTGT	GENCODE	+			ASMM10AP1B119508824V4	87944490	87853287	protein_coding	18.0806	76.3892	4.16744	6.03272	21.6512	20.2858	5.9658	23.809	18.6914	75.8342	74.1393	89.183	79.5193	63.2702	4.50865	4.30432	2.69414	4.86422	4.46587	6.35379	6.39174	6.01728	5.78044	5.62033
ENSMUST00000039803	0.000431865	0.00613394	3.64122	down	Yes	chr14	ubiquitin associated domain containing 2 [Source:MGI Symbol;Acc:MGI:1916139]	ENSMUSG00000041765	Ubac2	Yes	chr14:121878620-122021034:+	NM_026861	2139	TGCTGTCAAGCACGACTTGCAGATTTGGAGGCTGATATGCGGAAGAATAATTTGCCTTGA	GENCODE	+			ASMM10AP1B116092680V4	122021034	121878620	protein_coding	7.59457	32.6057	2.95915	4.82357	7.86681	6.48752	5	6.52685	12.0916	37.6658	29.112	40.3516	28.2017	27.6974	2.97533	2.6496	2.33871	3.01751	3.8146	5.41591	5.13335	4.85832	4.31107	4.39922
ENSMUST00000164192	0.000122892	0.00325119	3.63651	down	Yes	chr17	RAS, guanyl releasing protein 3 [Source:MGI Symbol;Acc:MGI:3028579]	ENSMUSG00000071042	Rasgrp3		chr17:75435905-75529043:+	NM_001360103	4665	CACACCTCTTGTGAACTTCCACTGACTACATGACTGCGGATTCGGAGCATTCTTGAAGTA	GENCODE	+			ASMM10AP1B107436692V4	75529043	75435905	protein_coding	18.0201	81.8459	4.2743	6.13686	18.6217	15.0024	12.4498	25.5009	18.5255	86.0913	83.6389	84.9075	82.327	72.2647	4.277	3.85817	3.81983	4.96548	4.45104	6.52708	6.5614	5.9438	5.8315	5.82052
ENSMUST00000189137	4.56743e-05	0.0020203	3.61948	down	Yes	chr9	transient receptor potential cation channel, subfamily C, member 1 [Source:MGI Symbol;Acc:MGI:109528]	ENSMUSG00000032839	Trpc1		chr9:95705082-95750358:-	NM_011643	4559	ACGGTTGTCAGTCCGCAGATGCACTTTTGGTGGCAATCGACTCTGAAGTAGTGGGAGCTG	GENCODE	-			ASMM10AP1B111145338V4	95750358	95705082	protein_coding	5	20.753	2.34112	4.1969	5	5	5	5	5	23.8034	21.4748	20.9276	19.1097	18.4498	2.33259	2.33065	2.33871	2.35905	2.34458	4.79577	4.73288	3.9112	3.74817	3.79648
ENSMUST00000097632	0.000206855	0.00417252	3.60497	down	Yes	chr1	galactose-3-O-sulfotransferase 2C [Source:MGI Symbol;Acc:MGI:3646771]	ENSMUSG00000073608	Gal3st2c		chr1:93990509-94017147:+	NM_001039219	9667	CTATTTGCTGTATGTGTGGAACAATATCCAAGAATAAACTACAGATTATTTTCTTTCCTT	GENCODE	+			ASMM10AP1B100127233V4	94017147	93990509	protein_coding	48.6754	222.831	5.71063	7.56062	47.1093	58.2153	24.1106	49.6596	64.282	241.027	193.42	293.976	203.069	182.665	5.66578	5.88334	4.83562	5.92189	6.24653	7.98982	7.75331	7.70047	7.1276	7.2319
ENSMUST00000082437	2.94141e-05	0.00168426	3.60432	down	Yes	chr3	selenoprotein F [Source:MGI Symbol;Acc:MGI:1927947]	ENSMUSG00000037072	Selenof		chr3:144570426-144597680:+	NM_053102	1514	TCCCATGGTCGCCTAACTAACACTCGTCTTTGTGGGATAATAGGCTTGTAGCAGTGGCCT	GENCODE	+			ASMM10AP1B100107335V4	144597680	144570426	protein_coding	8.4029	39.4838	3.14783	4.99755	12.0204	7.70027	7.34592	6.13155	8.81633	18.0364	22.9653	52.6448	55.6242	48.1481	3.61091	2.85607	2.99139	2.93124	3.34952	4.42418	4.82329	5.23755	5.2777	5.22506
ENSMUST00000022511	0.00360213	0.0204083	3.6042	down	Yes	chr14	zinc finger, MYM-type 2 [Source:MGI Symbol;Acc:MGI:1923257]	ENSMUSG00000021945	Zmym2	Yes	chr14:56887819-56962701:+	NM_001360643	6974	CTTTTACTGTATTAGGTAACATGAGATATTAAAGGATTTTTCTAGGCAAGACGCTCAGTC	GENCODE	+	Nucleus	Yes	ASMM10AP1B116505545V4	56962701	56887819	protein_coding	346.217	1498.86	8.37846	10.2281	304.27	187.651	111.45	586.461	541.251	1289.75	1247.46	1945.97	1978.24	1032.86	8.45792	7.55897	7.21082	9.42539	9.2392	10.3543	10.3289	10.3357	10.3495	9.77222
ENSMUST00000058472	6.9832e-06	0.000729745	3.59918	down	Yes	chr5	SV2 related protein [Source:MGI Symbol;Acc:MGI:1915916]	ENSMUSG00000042078	Svop		chr5:114026910-114091570:-	NM_026805	3379	TTAATCAATTCGTACAAATACTCAGGGAGGGAGGCTTCTTCTGGACGGTCGGGGTGTCCC	GENCODE	-	Cytoplasm		ASMM10AP1B100048246V4	114091570	114026910	protein_coding	19.2896	96.3249	4.41557	6.26324	22.1682	20.9744	17.5971	18.8546	16.8538	46.3471	59.3538	129.13	146.049	100.745	4.54062	4.35219	4.35206	4.52033	4.31268	5.69361	6.08192	6.56033	6.65477	6.32559
ENSMUST00000003450	0.00480122	0.0244296	3.59429	down	Yes	chr15	DEAD (Asp-Glu-Ala-Asp) box polypeptide 23 [Source:MGI Symbol;Acc:MGI:1921601]	ENSMUSG00000003360	Ddx23		chr15:98645134-98662889:-	NM_001080981	3187	TATGGTTGTCAACTATGATATGGCCAAAAATATTGAAGATTACATTCACAGAATTGGCCG	GENCODE	-			ASMM10AP1B113126472V4	98662889	98645134	protein_coding	16.6811	69.8329	4.00947	5.85518	19.8369	19.9232	5	20.5814	18.0642	59.4184	66.1914	93.6456	89.2905	40.6185	4.37352	4.27384	2.33871	4.64731	4.41399	6.0287	6.23293	6.08897	5.94751	4.9778
ENSMUST00000207826	0.00187159	0.013871	3.59049	down	Yes	chr16	zinc finger protein 654 [Source:MGI Symbol;Acc:MGI:1919270]	ENSMUSG00000047141	Zfp654		chr16:64780347-64851652:-	NM_001347245	6261	TGGGGACATGTACTACATATGGGAGTTGATTTTCCTATGGAGTAAACTACAGCTTAAATC	GENCODE	-	Nucleus	Yes	ASMM10AP1B104901549V4	64851652	64780347	protein_coding	14.5954	63.3681	3.89343	5.73761	18.4482	11.1285	7.1561	20.4934	15.7509	73.1616	69.7103	65.9308	68.7206	39.3173	4.26126	3.40323	2.94819	4.64103	4.21344	6.30584	6.30473	5.57108	5.57881	4.92759
ENSMUST00000021807	0.000605914	0.00722602	3.58875	down	Yes	chr13	DEK oncogene (DNA binding) [Source:MGI Symbol;Acc:MGI:1926209]	ENSMUSG00000021377	Dek		chr13:47084782-47106190:-	NM_025900	2556	TGCTGCTGACTCTTTTGCGTGTTAACATATTTGAGCTTGTTTTAAATTGTATTTTCTTGT	GENCODE	-		Yes	ASMM10AP1B112470200V4	47106190	47084782	protein_coding	352.31	1624.8	8.53938	10.3829	321.029	280.171	148.524	512.706	499.118	1743.27	1652.85	1851.24	1585.9	1290.74	8.54211	8.11996	7.66041	9.23689	9.13756	10.7731	10.7375	10.2708	10.0399	10.093
ENSMUST00000041725	8.1665e-06	0.000812762	3.58305	down	Yes	chr11	mannoside acetylglucosaminyltransferase 4, isoenzyme B [Source:MGI Symbol;Acc:MGI:2143974]	ENSMUSG00000036620	Mgat4b		chr11:50225335-50235103:+	NM_145926	2429	TGGCGGGCAAAATCCAGAAACTGAAGGATAAAGACTTTGGAAAGCATGCTCTCCGGAAGG	GENCODE	+			ASMM10AP1B109590311V4	50235103	50225335	protein_coding	38.6128	181.557	5.42659	7.26778	42.4049	35.7826	27.1216	45.3101	42.4447	160.512	166.498	205.977	230.075	144.724	5.50539	5.15223	5.02549	5.79224	5.65759	7.40129	7.53144	7.21621	7.30927	6.88066
ENSMUST00000228284	0.000723066	0.00790113	3.57794	down	Yes	chr15	protein phosphatase 6, regulatory subunit 2 [Source:MGI Symbol;Acc:MGI:1918724]	ENSMUSG00000036561	Ppp6r2		chr15:89211601-89286264:+	NM_026813	3297	CCTGAATGCAAGATTTAAACAAGGTATTGCCATAGAAGGATCAATGTCCAGGGCCAAGGC	GENCODE	+			ASMM10AP1B100761083V4	89286264	89211601	protein_coding	16.2438	69.876	4.04974	5.88887	24.0997	13.9014	7.34599	18.8123	17.0598	76.8471	54.4915	80.8075	84.1645	53.0692	4.66642	3.74419	2.99179	4.51752	4.32876	6.37064	5.97055	5.87112	5.86616	5.36585
ENSMUST00000021471	1.26059e-05	0.00106337	3.57157	down	Yes	chr12	thioredoxin-related transmembrane protein 1 [Source:MGI Symbol;Acc:MGI:1919986]	ENSMUSG00000021072	Tmx1		chr12:70453095-70468040:+	NM_028339	2795	GGTTTGGTCCAAGTTCTGTTCTGATGACTATGATGTCAGCACTTTTTCAACTCTCTGTGT	GENCODE	+			ASMM10AP1B106005917V4	70468040	70453095	protein_coding	127.374	612.557	7.16343	8.99999	148.929	150.867	81.4826	125.976	129.617	568.518	672.845	697.546	543.728	580.15	7.3774	7.24699	6.73217	7.24378	7.21681	9.18741	9.47563	8.89908	8.5283	8.90951
ENSMUST00000122026	0.000548232	0.00689933	3.56872	down	Yes	chr5	lipoic acid synthetase [Source:MGI Symbol;Acc:MGI:1934604]	ENSMUSG00000029199	Lias		chr5:65391497-65409207:+	NM_024471	1668	CGACGTATCGCGTCATGACTCAAGCGACGAGTTGTTGGACGCGTCCGGTGCCGGGGGTGC	GENCODE	+	Nucleus		ASMM10AP1B126698239V4	65409207	65391497	protein_coding	5.86729	25.7244	2.62046	4.45586	5.07102	6.92322	5.97278	5	6.36943	25.739	38.0058	22.8023	23.2781	18.797	2.47311	2.71828	2.6962	2.35905	2.85564	4.90536	5.4906	4.02967	4.03052	3.82316
ENSMUST00000030028	0.000957659	0.00929056	3.56768	down	Yes	chr4	endoplasmic reticulum protein 44 [Source:MGI Symbol;Acc:MGI:1923549]	ENSMUSG00000028343	Erp44	Yes	chr4:48193323-48279558:-	NM_029572	2624	AGGAAGAATATCCAGATAAAAATCAAGTAGTGTTTGCCAGAGTTGATTGTGATCAGCACT	GENCODE	-	Nucleus		ASMM10AP1B100172922V4	48279558	48193323	protein_coding	69.0484	305.189	6.18166	8.01665	74.8163	67.6829	27.8065	83.5302	91.4063	342.136	334.373	283.229	270.716	295.491	6.3427	6.11217	5.06478	6.65867	6.73	8.47106	8.49515	7.6499	7.53749	7.92967
ENSMUST00000001825	0.000555816	0.00693009	3.56687	down	Yes	chr9	cysteine and histidine-rich domain (CHORD)-containing, zinc-binding protein 1 [Source:MGI Symbol;Acc:MGI:1914167]	ENSMUSG00000001774	Chordc1		chr9:18292125-18317442:+	NM_025844	5789	GGAGAGAAAGAATTTCATCAAAATGTGAAACTGTGGGGTGTAATTGATGTTAAACGAAGT	GENCODE	+	Nucleus		ASMM10AP1B109908580V4	18317442	18292125	protein_coding	298.119	1444.91	8.36362	10.1983	313.23	369.069	137.311	291.454	379.533	1789.23	1208.61	1199.11	1140.58	1887.02	8.50087	8.5469	7.53735	8.47649	8.75648	10.8074	10.2903	9.65039	9.56931	10.6739
ENSMUST00000030367	0.00449436	0.0234026	3.55956	down	Yes	chr4	single-stranded DNA binding protein 3 [Source:MGI Symbol;Acc:MGI:1919725]	ENSMUSG00000061887	Ssbp3	Yes	chr4:106911470-107049694:+	NM_023672	3195	TGGACAGTTTGCAATTGCTGGTTTATTTCAAAAGCTGTTTGGGGAAAAGGAACAGAAACC	GENCODE	+		Yes	ASMM10AP1B103393348V4	107049694	106911470	protein_coding	12.1034	47.632	3.53076	5.36246	15.3037	5	5.5232	19.3178	15.3725	49.7573	36.5274	60.8402	41.5895	49.4456	3.973	2.33065	2.61439	4.55706	4.17868	5.7882	5.43722	5.44885	4.87059	5.26743
ENSMUST00000102969	2.39933e-06	0.000455873	3.54965	down	Yes	chr13	histone cluster 1, H2ae [Source:MGI Symbol;Acc:MGI:2448290]	ENSMUSG00000069272	Hist1h2ae		chr13:23570517-23571220:-	NM_178187	704	AATGGCATAAGAAAATTCAACCTGTCAATTGTCCCCCAGCTTCTCCAATAAATGGGTCAA	GENCODE	-			ASMM10AP1B100033104V4	23571220	23570517	protein_coding	201.661	1030.02	7.85979	9.68747	200.959	201.516	146.566	231.17	228.092	677.243	937.193	1393.15	1360.76	781.774	7.83732	7.66041	7.63853	8.15071	8.012	9.43359	9.93506	9.87321	9.82631	9.36918
ENSMUST00000166734	5.76298e-05	0.00226197	3.54765	down	Yes	chr9	CLIP associating protein 2 [Source:MGI Symbol;Acc:MGI:1923749]	ENSMUSG00000033392	Clasp2		chr9:113812598-113918190:+	NM_001114347	4108	TCACAAGAATGTTTGCAGATCCTCATGGCAAGAGGTGTTCAGCATGTTCTTGGAGACTCT	GENCODE	+			ASMM10AP1B107125028V4	113918190	113812598	protein_coding	26.273	119.485	4.85496	6.68183	35.8661	23.8501	20.4354	24.5319	26.6818	131.502	129.519	119.373	106.069	110.96	5.25141	4.54692	4.58472	4.90817	4.9836	7.12256	7.17946	6.44363	6.19274	6.47074
ENSMUST00000109734	3.25846e-05	0.00175354	3.54762	down	Yes	chr8	peroxiredoxin 2 [Source:MGI Symbol;Acc:MGI:109486]	ENSMUSG00000005161	Prdx2		chr8:84969587-84974834:+	NM_001317385	1612	TCTCTACCCGTGTCTGGACGTCCGTGTGTCCGGCTCTTGCTCACGCAGACTTAGCACCAA	GENCODE	+			ASMM10AP1B109130908V4	84974834	84969587	protein_coding	85.8088	404.185	6.5842	8.41105	93.1624	79.8668	54.3521	92.0442	109.619	436.09	408.335	408.116	412.262	356.123	6.6734	6.35659	6.11302	6.79503	6.98298	8.80601	8.76994	8.14764	8.13361	8.19808
ENSMUST00000030436	3.3856e-05	0.00175354	3.54706	down	Yes	chr4	proline-rich nuclear receptor coactivator 2 [Source:MGI Symbol;Acc:MGI:106512]	ENSMUSG00000028675	Pnrc2		chr4:135870918-135873850:-	NM_026383	1919	TCCCAGACGAAGATTGCTCATAAGAAAAAGGAACGAGGACATGGGTACAATCCAGCAGCA	GENCODE	-		Yes	ASMM10AP1B109426245V4	135873850	135870918	protein_coding	355.666	1783.56	8.69159	10.5182	428.017	368.223	244.621	362.423	375.048	2029.31	2003.5	1731.5	1625.07	1528.44	8.96322	8.54103	8.43809	8.77364	8.74196	10.9735	11.02	10.1788	10.0738	10.345
ENSMUST00000106849	4.67852e-05	0.0020371	3.54523	down	No	chr7	tripartite motif-containing 34A [Source:MGI Symbol;Acc:MGI:2137359]	ENSMUSG00000056144	Trim34a		chr7:104244457-104262234:+	NM_030684	2578	GCCAGTAACTCATCCTTGTTGTTTAAGACAATCCATAAGAACTGACTCCAGACCACAACT	GENCODE	+			ASMM10AP1B116226619V4	104262234	104244457	protein_coding	169.787	825.819	7.59185	9.41773	175.615	154.884	113.636	211.868	192.933	669.877	951.304	676.228	937.581	894.107	7.63743	7.2874	7.24476	8.02011	7.76954	9.41473	9.95521	8.85823	9.30871	9.55175
ENSMUST00000100136	0.000259213	0.00472632	3.53269	down	Yes	chr16	immunoglobulin lambda-like polypeptide 1 [Source:MGI Symbol;Acc:MGI:96529]	ENSMUSG00000075370	Igll1		chr16:16860671-16863985:-	NM_001190325	870	GGTGGTGGGACCCAGCTCACAATCCTAGGTCAGCCCAAGTCTGACCCCTTGGTCACTCTG	GENCODE	-			ASMM10AP1B125260987V4	16863985	16860671	protein_coding	42.84	229.042	5.59951	7.42027	47.6209	43.3236	35.6794	39.4411	48.1352	100.862	182.072	334.055	396.297	131.924	5.68195	5.43253	5.44418	5.6001	5.83877	6.75108	7.65887	7.87017	8.08184	6.73942
ENSMUST00000022908	0.000858397	0.00873016	3.51909	down	Yes	chr15	solute carrier family 25, member 32 [Source:MGI Symbol;Acc:MGI:1917156]	ENSMUSG00000022299	Slc25a32		chr15:39091231-39112716:-	NM_172402	5905	TGCACTTGTGAAAATATATAAATATGAAGGTGTGCGTGGATTATACAAGGGATTTGTCCC	GENCODE	-			ASMM10AP1B105235909V4	39112716	39091231	protein_coding	34.2348	147.539	5.16853	6.98373	38.758	36.3519	14.3467	41.4493	40.2679	162.054	162.616	144.159	143.819	125.045	5.36847	5.1749	4.04616	5.67162	5.58149	7.41298	7.49618	6.72295	6.63354	6.65299
ENSMUST00000067795	0.000552	0.00691344	3.51892	down	Yes	chr19	ligand dependent nuclear receptor corepressor [Source:MGI Symbol;Acc:MGI:2443930]	ENSMUSG00000025019	Lcor		chr19:41482645-41562246:+		4810	TGTTTTGTGAAGCATGGTTGAAATTAGATAGTGGCCCCTTTTAAAATTCATGAGCCTCTC	GENCODE	+		Yes	ASMM10AP1B100096261V4	41562246	41482645	protein_coding	547.263	2495.74	9.1722	10.9873	469.647	463.31	217.959	848.423	736.975	2960.72	2002.88	2672.49	2948.96	1893.64	9.09673	8.92353	8.25586	9.92268	9.66219	11.5346	11.019	10.781	10.9226	10.6795
ENSMUST00000081567	2.53935e-05	0.00151096	3.51756	down	Yes	chr5	metal response element binding transcription factor 2 [Source:MGI Symbol;Acc:MGI:105050]	ENSMUSG00000029267	Mtf2		chr5:108065742-108109004:+	NM_013827	4060	TTGTTGTTTTCTTTCTTAGCCAAAGAGTAAACAGAAGAATATTATTTTGGTAGCTCTTCA	GENCODE	+	Nucleus	Yes	ASMM10AP1B107839945V4	108109004	108065742	protein_coding	85.1302	396.556	6.54755	8.36213	80.432	95.4888	46.8809	98.9961	103.853	402.346	274.416	490.881	462.022	353.116	6.45291	6.60837	5.87379	6.89215	6.91054	8.69602	8.22391	8.41079	8.29518	8.18474
ENSMUST00000062010	0.00329133	0.0192484	3.50743	down	Yes	chrX	retrotransposon Gag like 3 [Source:MGI Symbol;Acc:MGI:2685221]	ENSMUSG00000047686	Rtl3		chrX:106837082-106840644:-	NM_199468	2948	AACTGTAGTTGTTAGACCGATTTTGTTACTTTCTAGTCAAAATTACCACATATTTTCTGG	GENCODE	-			ASMM10AP1B100031964V4	106840644	106837082	protein_coding	29.1061	124.945	4.87899	6.68941	30.1787	15.9742	15.1648	44.3485	39.8643	94.1108	148.039	160.608	146.258	75.7087	4.99771	3.94802	4.12115	5.76027	5.56783	6.65025	7.37054	6.87559	6.65669	5.89397
ENSMUST00000163230	0.00367267	0.0206518	3.50153	down	Yes	chr16	CD200 antigen [Source:MGI Symbol;Acc:MGI:1196990]	ENSMUSG00000022661	Cd200		chr16:45382135-45409053:-	NM_010818	2347	TGAGCAATTAAAAGTGTCAACTAAATATTTGATGTGGCATTCCCTTGAGAAATATAGAAA	GENCODE	-			ASMM10AP1B111697750V4	45409053	45382135	protein_coding	3450.41	12892.9	11.6296	13.4376	2431.41	1406.2	1121.7	6766.36	5526.39	13011.5	12452.1	13586.6	17797.5	7617.07	11.5363	10.6968	10.819	12.7018	12.3941	13.7896	13.8035	13.1881	13.5784	12.8283
ENSMUST00000066427	0.000607792	0.00724326	3.49839	down	Yes	chr1	nuclear antigen Sp100 [Source:MGI Symbol;Acc:MGI:109561]	ENSMUSG00000026222	Sp100		chr1:85650050-85709998:+	NM_013673	2708	CCTGGATATTTGAAGTACATTTTGAAGTACATGATTAACGTGATGTTTTGTCGTGTTGGA	GENCODE	+		Yes	ASMM10AP1B100122036V4	85709998	85650050	protein_coding	1121.86	4937.68	10.1483	11.955	762.108	749.304	486.224	2092.54	1519.13	3363.8	4457.45	5471.92	7424.81	3970.44	9.80971	9.69299	9.47876	11.1053	10.6546	11.7241	12.2129	11.7814	12.2446	11.8118
ENSMUST00000185633	0.000496095	0.00657341	3.48742	down	No	chr9	5'-3' exoribonuclease 1 [Source:MGI Symbol;Acc:MGI:891964]	ENSMUSG00000032410	Xrn1		chr9:95954767-96057803:+	NM_001311130	10256	CTGGACACTTGTATGTGTCAAATGCGCTATGATTTTGATTAAAGATGGAATGACGACGAC	GENCODE	+	Nucleus		ASMM10AP1B100080800V4	96057803	95954767	protein_coding	374.53	1724.61	8.62687	10.429	295.384	291.118	178.732	480.075	627.343	1534.86	1547.1	2083.59	2353.08	1104.39	8.40969	8.18096	7.9553	9.14396	9.44443	10.5922	10.6444	10.4322	10.6089	9.86744
ENSMUST00000114709	0.00015634	0.0036356	3.48377	down	Yes	chr1	basic, immunoglobulin-like variable motif containing [Source:MGI Symbol;Acc:MGI:2179809]	ENSMUSG00000041684	Bivm		chr1:44119968-44144770:+	NM_144558	3570	ACTTGAGCACTGATTCTCTAATCCTTCACAACGTGATTTAGGAATTTTCTTATATTAATT	GENCODE	+			ASMM10AP1B100142125V4	44144770	44119968	protein_coding	17.328	78.0512	4.21935	6.02	18.1974	17.2278	10.982	21.9908	18.2421	69.0857	67.2608	100.442	104.689	48.7783	4.23916	4.05764	3.62404	4.74646	4.42948	6.23134	6.25366	6.19383	6.17457	5.24661
ENSMUST00000040344	0.0105658	0.0398616	3.48146	down	Yes	chr10	glucosamine (N-acetyl)-6-sulfatase [Source:MGI Symbol;Acc:MGI:1922862]	ENSMUSG00000034707	Gns		chr10:121365090-121397245:+	NM_001364695	3855	TCGGAGAGAAGGGGATGACTTTCTCTAGCGCCTATGTGCCCAGTGCTCTTTGCTGCCCCA	GENCODE	+	Nucleus		ASMM10AP1B123895050V4	121397245	121365090	protein_coding	93.8816	581.863	6.75003	8.54972	112.22	103.711	80.3733	85.8454	87.258	191.057	1234.05	520.902	777.75	185.553	6.94899	6.72364	6.71269	6.69776	6.66708	7.65293	10.3166	8.49697	9.02658	7.25549
ENSMUST00000005749	0.000244684	0.00460194	3.46587	down	Yes	chr7	CTR9 homolog, Paf1/RNA polymerase II complex component [Source:MGI Symbol;Acc:MGI:109345]	ENSMUSG00000005609	Ctr9		chr7:111028951-111056377:+	NM_009431	4300	TGCTGATGAAGGACATCCCAGGAATAGCAACAGCGATTCTGATGACGACGAGAGGCCCAA	GENCODE	+	Nucleus	Yes	ASMM10AP1B108320021V4	111056377	111028951	protein_coding	10.5601	43.9885	3.4689	5.26212	10.8907	9.80261	6.56422	13.955	11.5879	45.6375	43.4159	49.3506	37.1061	44.4325	3.46026	3.2159	2.81791	4.09844	3.752	5.67263	5.6742	5.14809	4.71077	5.1049
ENSMUST00000129820	0.0302471	0.0809949	3.46293	down	Yes	chr11	U7 snRNP-specific Sm-like protein LSM11 [Source:MGI Symbol;Acc:MGI:1919540]	ENSMUSG00000044847	Lsm11		chr11:45928269-45944935:-	NM_028185	6453	GCATTGTAACAGTTTTCAAAAATAAAGAAAAGTAGGTCCTAATGATGTATTGCTTCCCCG	GENCODE	-			ASMM10AP1B103283128V4	45944935	45928269	protein_coding	42.8508	139.032	5.08931	6.8813	30.5053	18.9194	8.39549	92.7141	63.7199	180.261	107.299	128.65	156.595	122.353	5.01429	4.19805	3.19748	6.80402	6.2327	7.57156	6.90807	6.55578	6.7535	6.61759
ENSMUST00000084653	5.35921e-05	0.00218551	3.45173	down	Yes	chr11	predicted gene 10447 [Source:MGI Symbol;Acc:MGI:3642647]	ENSMUSG00000072963	Gm10447		chr11:53454804-53457110:-		2307	GTACCACCCCTGCCCAGCAACAGAATATTCTTTTATATTATTAAACTTTTTATTTGTCTT	GENCODE	-			ASMM10AP1B100050221V4	53457110	53454804	protein_coding	146.033	772.038	7.39109	9.17841	151.999	185.546	137.116	130.606	124.899	424.691	571.036	1162.95	1229.32	472.194	7.41053	7.54287	7.53604	7.2973	7.16869	8.76769	9.2412	9.60994	9.6806	8.5926
ENSMUST00000014917	0.00186522	0.0138469	3.44773	down	Yes	chr17	delta like canonical Notch ligand 1 [Source:MGI Symbol;Acc:MGI:104659]	ENSMUSG00000014773	Dll1		chr17:15367354-15375976:-	NM_007865	3581	TCTGCAGAAAAGGATGAGTGTGTTATAGCGACTGAGGTGTAAGATGGAAGCGATGTGGCA	GENCODE	-	Exosome		ASMM10AP1B101924310V4	15375976	15367354	protein_coding	18.7638	76.8974	4.25069	6.03634	20.5925	19.6766	7.77387	28.1579	17.6182	80.5932	74.6908	60.8954	69.2276	99.0802	4.42856	4.25538	3.07831	5.11283	4.37835	6.43977	6.40291	5.45035	5.58926	6.29938
ENSMUST00000029671	0.000747789	0.00804782	3.4455	down	Yes	chr3	interferon-induced protein 44 [Source:MGI Symbol;Acc:MGI:2443016]	ENSMUSG00000028037	Ifi44		chr3:151730922-151749960:-	NM_133871	2910	ACAACTATAGTCCTGTGAAGTCCAAGCTGGAGGCATTCCATGGAGTCTTTGGTTTTGCCT	GENCODE	-			ASMM10AP1B112611210V4	151749960	151730922	protein_coding	21.7485	96.0481	4.53142	6.31614	18.0359	17.8956	14.2685	31.8264	26.7159	60.2557	112.667	70.5627	135.843	100.912	4.22555	4.11461	4.03744	5.2941	4.98541	6.04601	6.98055	5.67125	6.55499	6.32788
ENSMUST00000034012	0.000150955	0.0035706	3.44314	down	No	chr8	CCR4-NOT transcription complex, subunit 7 [Source:MGI Symbol;Acc:MGI:1298230]	ENSMUSG00000031601	Cnot7		chr8:40492540-40511754:-	NM_001361938	2615	AGGAATGGCCTTTTTCAAAATGAGAGAAATGTTCTTTGAAGATCACATTGATGATGCCAA	GENCODE	-	Nucleus	Yes	ASMM10AP1B112726112V4	40511754	40492540	protein_coding	130.354	584.854	7.1591	8.94282	142.092	118.972	67.0988	154.441	169.164	621.311	569.218	570.589	551.179	611.971	7.30496	6.92504	6.43469	7.54695	7.58385	9.31108	9.23454	8.62317	8.54868	8.99664
ENSMUST00000041606	0.0107298	0.0403152	3.43061	down	Yes	chr4	N-terminal EF-hand calcium binding protein 1 [Source:MGI Symbol;Acc:MGI:1916602]	ENSMUSG00000040536	Necab1		chr4:14952245-15149131:-	NM_178617	4922	CAAAAGTAAGCAATTCTAATGTATGTTTACTCAAAAGAAGTTTGTCAAGCTCTTATTAGC	GENCODE	-			ASMM10AP1B100091061V4	15149131	14952245	protein_coding	63.4242	226.869	5.80884	7.5873	52.3324	43.7768	15.7993	146.238	58.9742	179.796	207.676	257.876	293.762	195.235	5.8214	5.44978	4.18175	7.4721	6.11916	7.56784	7.85048	7.52496	7.65714	7.33609
ENSMUST00000023489	0.000454528	0.00627039	3.4292	down	Yes	chr16	forty-two-three domain containing 1 [Source:MGI Symbol;Acc:MGI:1917955]	ENSMUSG00000022800	Fyttd1		chr16:32877781-32908875:+	NM_027226	4312	CCTGAGTCTAGTGTCTGTAGATTCTTCTATAAATGATGCTTACAAGAATTACAATTTTTA	GENCODE	+			ASMM10AP1B115729163V4	32908875	32877781	protein_coding	256.768	1156.26	8.12496	9.90283	273.645	208.082	118.772	329.867	353.476	1214.67	1242.57	1160.16	1197.52	966.364	8.30236	7.70315	7.31196	8.64881	8.65851	10.265	10.3245	9.60486	9.64143	9.67839
ENSMUST00000034349	0.000106915	0.00304017	3.42855	down	Yes	chr8	NEDD8 activating enzyme E1 subunit 1 [Source:MGI Symbol;Acc:MGI:2384561]	ENSMUSG00000031878	Nae1		chr8:104511028-104534637:-	NM_144931	1808	CCTTCAAAAAAGCAGTATTGGCAAGAACCGAGCTCAAGCTGCCATGGAATTCTTACAAGA	GENCODE	-			ASMM10AP1B124292552V4	104534637	104511028	protein_coding	112.81	523.251	6.9898	8.7674	136.706	118.589	81.1197	90.181	137.457	575.364	630.517	441.839	500.398	468.14	7.24404	6.92094	6.72567	6.76533	7.29303	9.20651	9.38079	8.26009	8.41079	8.57881
ENSMUST00000076249	0.0286521	0.0779833	3.42493	down	Yes	chr19	interferon-induced protein with tetratricopeptide repeats 3B [Source:MGI Symbol;Acc:MGI:3698419]	ENSMUSG00000062488	Ifit3b		chr19:34607970-34613401:+	NM_001005858	2000	TCAATTAAAATAGAGTCCTGTGTGTGGTGGTAAGAGACAGCAAAATAAAACAGTCATATT	GENCODE	+			ASMM10AP1B100041367V4	34613401	34607970	protein_coding	1043.67	3838.22	9.67524	11.4513	591.194	352.635	247.225	2431.35	1595.94	2234.43	4468.62	3002.48	7557.87	1927.7	9.42405	8.478	8.45356	11.3048	10.7158	11.1177	12.2154	10.952	12.2666	10.7049
ENSMUST00000041589	7.82959e-05	0.00259101	3.42132	down	Yes	chr11	transducer of ErbB-2.1 [Source:MGI Symbol;Acc:MGI:1349721]	ENSMUSG00000037573	Tob1		chr11:94211454-94215495:+	NM_009427	2288	GTATTTTGAGTCAGTGTCTTACATGTTAAGAGGGACTGAAATAGTTTATATTAAGTTTGT	GENCODE	+		Yes	ASMM10AP1B100081716V4	94215495	94211454	protein_coding	2716.34	11986.1	11.5705	13.3451	2635.38	2414.55	1295.98	3643.2	3592.57	12884.6	11746	13494.4	14560.1	7245.53	11.6571	11.4699	11.0435	11.8603	11.8219	13.7775	13.7287	13.1715	13.2938	12.7539
ENSMUST00000042410	0.000560901	0.00696751	3.41903	down	No	chr5	cyclin-dependent kinase 6 [Source:MGI Symbol;Acc:MGI:1277162]	ENSMUSG00000040274	Cdk6	Yes	chr5:3344312-3522225:+		2470	GGCAAAGACCTACTTCTGAAATGCCTGACGTTTAATCCAGCTAAAAGGATATCCGCCTAC	GENCODE	+			ASMM10AP1B106443068V4	3522225	3344312	protein_coding	9.44763	38.4257	3.30122	5.0748	10.1875	5	11.4035	13.0624	7.58463	37.9525	36.735	36.6545	42.658	38.1284	3.361	2.33065	3.6835	4.00239	3.12855	5.42623	5.44285	4.71867	4.90568	4.88059
ENSMUST00000110186	5.27049e-05	0.00216518	3.4188	down	Yes	chr2	spermine oxidase [Source:MGI Symbol;Acc:MGI:2445356]	ENSMUSG00000027333	Smox		chr2:131491943-131525172:+	NM_001177833	2170	AGCTAGCCAAGCCCCTGCCCTACACAGAGAGCTCCAAGACAGCGCATAGAAGCTCCACAG	GENCODE	+	Cytoplasm		ASMM10AP1B106141900V4	131525172	131491943	protein_coding	164.877	792.435	7.5175	9.29099	150.36	257.099	127.079	126.723	163.123	550.356	790.475	1035.69	1104.4	481.255	7.39208	7.9915	7.42164	7.25362	7.52867	9.13823	9.70276	9.46199	9.52422	8.62775
ENSMUST00000071370	0.000711311	0.00784507	3.41564	down	Yes	chr14	protocadherin 17 [Source:MGI Symbol;Acc:MGI:2684924]	ENSMUSG00000035566	Pcdh17		chr14:84443563-84539002:+	NM_001013753	11451	TCAAGATGAAAACTACTTCAACTAAAAGTCAGCCACTCGAACAAGAACCAGAAGAGTGCA	GENCODE	+	Cytoplasm		ASMM10AP1B101523198V4	84539002	84443563	protein_coding	9.38203	38.5115	3.27462	5.04677	7.06494	9.65774	5.39915	12.9247	11.8637	30.5134	42.9683	43.102	47.6798	28.2938	2.81757	3.19256	2.59026	3.98739	3.78531	5.13478	5.65732	4.95238	5.05678	4.43261
ENSMUST00000049453	0.000117549	0.00320152	3.41454	down	Yes	chr5	ubiquitin protein ligase E3C [Source:MGI Symbol;Acc:MGI:2140998]	ENSMUSG00000039000	Ube3c	Yes	chr5:29569242-29676092:+	NM_133907	5048	TCTCCTGGGTTTCAAGGAGCTATACCCTGCGTTTTGCATTCACAATGGAGGCTCTGACCT	GENCODE	+	Exosome		ASMM10AP1B114450783V4	29676092	29569242	protein_coding	31.2349	136.055	5.10306	6.87475	38.7592	26.8177	21.7235	30.268	38.6059	139.243	154.217	131.063	126.6	129.153	5.3687	4.72416	4.67732	5.22363	5.52148	7.21015	7.42629	6.58407	6.44818	6.70506
ENSMUST00000030145	0.00032374	0.00530136	3.41256	down	Yes	chr4	DDB1 and CUL4 associated factor 12 [Source:MGI Symbol;Acc:MGI:1916220]	ENSMUSG00000028436	Dcaf12		chr4:41291300-41314889:-	NM_026893	3442	TCTCCTGTGATGCTTTTGATTGTCTTGAGATTTTCTGTTTTTAAAAATGTAGCATTTGAC	GENCODE	-			ASMM10AP1B100062454V4	41314889	41291300	protein_coding	793.587	3498.69	9.7172	11.4881	686.918	637.12	314.583	1203.36	1125.95	3402.2	2627	4420.99	3964.77	3078.51	9.65831	9.44443	8.81821	10.4039	10.2612	11.7406	11.4261	11.4971	11.3594	11.417
ENSMUST00000110168	0.000251398	0.00466007	3.41193	down	Yes	chr15	zinc fingers and homeoboxes 1 [Source:MGI Symbol;Acc:MGI:109271]	ENSMUSG00000022361	Zhx1		chr15:58047003-58076489:-	NM_001042438	5212	TGATTAAATTGCTCCCTTTTTAAAACCATTGCTAATGTGGTCTGAGTTTTATTTGACAGT	GENCODE	-		Yes	ASMM10AP1B114914602V4	58076489	58047003	protein_coding	331.203	1532.3	8.47129	10.2419	270.302	267.364	164.174	472.663	481.513	1046.73	1176.58	2197.99	2033.28	1206.93	8.28364	8.04854	7.81794	9.12115	9.08517	10.0628	10.2531	10.5006	10.3871	10.0056
ENSMUST00000131070	0.00126812	0.011026	3.40981	down	Yes	chr19	insulin degrading enzyme [Source:MGI Symbol;Acc:MGI:96412]	ENSMUSG00000056999	Ide		chr19:37268743-37330613:-	NM_031156	4962	GCCGAAAGCTTGTCTCAACTTTGAATTTTTCAGCCCGTTTGCTTATGTGGACCCCTTGCA	GENCODE	-	Nucleus		ASMM10AP1B115424764V4	37330613	37268743	protein_coding	63.0645	290.837	6.11027	7.87996	81.2196	79.8566	35.5014	65.7063	53.0385	284.667	353.165	401.726	155.629	258.997	6.46782	6.35636	5.43596	6.31432	5.9769	8.22097	8.56909	8.12398	6.74524	7.74055
ENSMUST00000031235	1.72812e-05	0.00124544	3.39731	down	Yes	chr5	guanylate-binding protein 8 [Source:MGI Symbol;Acc:MGI:1923324]	ENSMUSG00000034438	Gbp8		chr5:105014153-105139540:-	NM_029509	2459	ATGAGTACCTGGAGAATGCCCTGAAGCTGATCCCAGGATTGGGGATTCTAGTGACAACCT	GENCODE	-			ASMM10AP1B124959167V4	105139540	105014153	protein_coding	25.8884	116.743	4.85129	6.61569	29.3765	25.8039	21.0921	26.7979	26.3719	76.163	132.671	104.033	160.222	110.624	4.9564	4.66399	4.63121	5.03786	4.96699	6.35959	7.21639	6.24983	6.78591	6.46671
ENSMUST00000078386	0.000285452	0.00499766	3.39546	down	Yes	chr14	SLIT and NTRK-like family, member 6 [Source:MGI Symbol;Acc:MGI:2443198]	ENSMUSG00000045871	Slitrk6		chr14:110748580-110755149:-	NM_175499	4240	CACAAGATAATTATACTTGGGTGCCTTTTAAGAAAGTTTAAGATTATTGCTCACTTCAAT	GENCODE	-			ASMM10AP1B100108753V4	110755149	110748580	protein_coding	70.8552	334.936	6.31418	8.07778	59.1636	69.4931	52.1517	89.3881	84.0792	286.021	369.375	498.394	335.412	185.479	5.99946	6.15389	6.048	6.75296	6.61656	8.22712	8.62864	8.43435	7.84437	7.25443
ENSMUST00000000095	0.000732086	0.00795353	3.38801	down	Yes	chr11	T-box 2 [Source:MGI Symbol;Acc:MGI:98494]	ENSMUSG00000000093	Tbx2		chr11:85832551-85841948:+	NM_009324	3626	GGATACAAATTCGTATTAATTTATTCGAAGGTGTACATTGCTGTGTACATATATTTAGAG	GENCODE	+	Cytoplasm	Yes	ASMM10AP1B100008825V4	85841948	85832551	protein_coding	16.3585	67.636	4.0744	5.83484	13.8613	14.3779	8.62671	23.9821	20.9445	63.5694	49.5058	100.744	66.8034	57.5575	3.82264	3.79686	3.24264	4.87563	4.63423	6.11333	5.843	6.19822	5.53705	5.48257
ENSMUST00000159787	1.86769e-05	0.00130155	3.3866	down	No	chr16	homogentisate 1, 2-dioxygenase [Source:MGI Symbol;Acc:MGI:96078]	ENSMUSG00000022821	Hgd		chr16:37580250-37632020:+	NR_027778	1516	TCCAGGTTCCCTGCCCAAAGGACAGCTGGCTGTATAGGATTCTTCCTTCAGTTTCTCACA	GENCODE	+			ASMM10AP1B122767563V4	37632020	37580250	protein_coding	36.916	170.904	5.36901	7.12885	34.1085	50.6917	37.2648	29.9117	32.6035	109.16	163.311	221.484	239.864	120.698	5.18155	5.67139	5.51052	5.20606	5.27552	6.85795	7.50381	7.31317	7.36865	6.60067
ENSMUST00000139122	0.000444379	0.00622165	3.38479	down	Yes	chr5	small integral membrane protein 14 [Source:MGI Symbol;Acc:MGI:1915802]	ENSMUSG00000037822	Smim14		chr5:65446844-65493400:-	NM_133697	4560	TTGATTAATATAGTGGTTGGTTTAGAATCCATTTCGTGTCATTGAAAGCCACTGTATGCT	GENCODE	-			ASMM10AP1B101579311V4	65493400	65446844	protein_coding	38.5741	162.491	5.35414	7.11321	35.9911	43.2779	18.0947	45.0805	50.4262	155.866	165.334	190.641	174.841	125.773	5.25616	5.42968	4.39755	5.78247	5.90487	7.36455	7.52237	7.10603	6.91054	6.66256
ENSMUST00000037763	0.000159325	0.00368452	3.37752	down	Yes	chr18	YTH domain containing 2 [Source:MGI Symbol;Acc:MGI:2448561]	ENSMUSG00000034653	Ythdc2		chr18:44827746-44889717:+	NM_001163013	7215	GCTGACACTGAGTTTGCGGATGGATCTACTACTGGAGAAAGAGTACTGATGAAATCTCCA	GENCODE	+			ASMM10AP1B100715588V4	44889717	44827746	protein_coding	5.17563	21.3049	2.40908	4.16504	5	5	5.87814	5	5	16.2452	20.2089	21.9254	35.1578	12.9871	2.33259	2.33065	2.67852	2.35905	2.34458	4.28813	4.65226	3.97897	4.63203	3.27383
ENSMUST00000169020	0.000185705	0.00392045	3.36196	down	Yes	chr8	golgi apparatus protein 1 [Source:MGI Symbol;Acc:MGI:104967]	ENSMUSG00000003316	Glg1	Yes	chr8:111154421-111259216:-	NM_009149	7021	ACAGGGCATCTGTGGACCAGGTCAGAAATCTGTCAATGAGCCAAGAACCAGACAAACTAA	GENCODE	-	Nucleus		ASMM10AP1B107514821V4	111259216	111154421	protein_coding	23.5507	102.24	4.69368	6.44298	31.1137	24.9426	17.5626	22.14	21.9948	117.266	116.621	110.065	78.3528	88.8949	5.04335	4.61221	4.34845	4.75894	4.70546	6.95796	7.03578	6.3273	5.76181	6.13207
ENSMUST00000172136	0.000291448	0.00502891	3.36086	down	Yes	chr7	PWWP domain containing 2B [Source:MGI Symbol;Acc:MGI:2142008]	ENSMUSG00000060260	Pwwp2b		chr7:139248487-139267161:+	NM_001098636	2543	ACCCAGTTTGAAATGTAACTTTGGTTCCAAGAGCAGGTCACCGACAATGAGGGTGCAGCT	GENCODE	+	Cytoplasm		ASMM10AP1B113841020V4	139267161	139248487	protein_coding	7.11486	28.4664	2.8857	4.63453	9.30982	6.59416	5	5.49806	9.17224	35.8034	22.5103	28.5748	24.5211	30.9225	3.22358	2.66411	2.33871	2.79176	3.41032	5.34909	4.79722	4.35282	4.10554	4.56797
ENSMUST00000024708	0.000135333	0.00342145	3.35428	down	Yes	chr17	tumor necrosis factor receptor superfamily, member 21 [Source:MGI Symbol;Acc:MGI:2151075]	ENSMUSG00000023915	Tnfrsf21		chr17:43016555-43089189:+	NM_178589	3627	GAGCAGAAACGGCTCCTTTATTACCAAAGAAAAGAAGGACACAGTGTTGCGGCAGGTCCG	GENCODE	+			ASMM10AP1B101254066V4	43089189	43016555	protein_coding	7.47488	30.3275	2.99453	4.74054	9.90193	5.76187	5.25715	6.68924	9.76423	31.3486	28.2377	29.1669	30.2292	32.6549	3.31802	2.53859	2.56313	3.04927	3.50367	5.16796	5.09191	4.38446	4.40979	4.64856
ENSMUST00000179226	4.56004e-05	0.0020203	3.35215	down	No	chr13	collagen, type IV, alpha 3 (Goodpasture antigen) binding protein [Source:MGI Symbol;Acc:MGI:1915268]	ENSMUSG00000021669	Col4a3bp	Yes	chr13:96542618-96638015:+		3040	GCACCTGAGGCATGTGCTCTCTGTGCACCAAATACTCAGATGGGCTTCTTTTTACAGGCC	GENCODE	+	Nucleus		ASMM10AP1B102018026V4	96638015	96542618	protein_coding	36.6453	157.762	5.34461	7.08969	44.6908	47.6938	26.9761	29.5538	34.312	171.32	166.009	148.598	138.845	164.039	5.58408	5.58196	5.01514	5.18818	5.35368	7.49789	7.52717	6.76858	6.58482	7.07002
ENSMUST00000041705	3.06424e-06	0.00048334	3.35215	down	Yes	chr11	spermatogenesis associated 20 [Source:MGI Symbol;Acc:MGI:2183449]	ENSMUSG00000020867	Spata20		chr11:94478904-94485348:-	NM_144827	2627	CCGTGGTTCAGAAAGGGGCAGCTCTTCCCGGGACAAGGACCGAAGTGCTACTACAGTTAG	GENCODE	-			ASMM10AP1B111637759V4	94485348	94478904	protein_coding	11.3552	48.847	3.61497	5.36005	13.9881	9.76334	10.7079	9.60217	12.7145	31.8088	37.0967	55.4116	73.5206	46.3972	3.839	3.20933	3.58813	3.55282	3.88555	5.19267	5.45655	5.3157	5.66883	5.16651
ENSMUST00000030763	0.000977088	0.0093777	3.34906	down	Yes	chr5	cyclin-dependent kinase 14 [Source:MGI Symbol;Acc:MGI:894318]	ENSMUSG00000028926	Cdk14		chr5:4803391-5380197:-	NM_011074	4851	ACACTCTATTTTTAAACTGGAGAAAATAGTAGCAAATATCATTCTTAAAACCTGGGTACA	GENCODE	-			ASMM10AP1B109446328V4	5380197	4803391	protein_coding	87.2311	360.797	6.4954	8.23915	73.1071	55.2998	45.5957	144.886	117.267	325.505	307.419	472.558	388.753	309.751	6.30826	5.804	5.82997	7.45753	7.07723	8.40277	8.38066	8.36188	8.05495	7.9955
ENSMUST00000092404	3.86028e-06	0.000537866	3.33992	down	Yes	chr11	serine/arginine-rich splicing factor 2 [Source:MGI Symbol;Acc:MGI:98284]	ENSMUSG00000034120	Srsf2		chr11:116849901-116853094:-	NM_011358	1899	CCTTCAGGTCTATATGATAATCTGAACCCAAATTTGTATAAAGACTTTTCAGGTGAAAAG	GENCODE	-		Yes	ASMM10AP1B100004473V4	116853094	116849901	protein_coding	529.124	2510.78	9.27118	11.011	586.437	482.869	384.775	592.131	599.41	2330.12	2586.92	3063.48	2541.46	2031.9	9.41439	8.9985	9.12344	9.43699	9.38256	11.1785	11.4045	10.9933	10.6981	10.7805
ENSMUST00000056403	4.99059e-07	0.000208607	3.33721	down	Yes	chr6	H1 histone family, member X [Source:MGI Symbol;Acc:MGI:2685307]	ENSMUSG00000044927	H1fx		chr6:87980421-87981637:-	NM_198622	1217	CTGTTTGCTTTAGGTTTTTGAAACGGCCCTGGCGACGCCCCCATTGGCTCTCACCCTTGG	GENCODE	-		Yes	ASMM10AP1B100134143V4	87981637	87980421	protein_coding	99.1066	474.119	6.83538	8.57402	107.1	105.848	97.437	85.4403	99.7079	281.742	372.982	628.371	650.584	436.916	6.87686	6.75137	7.00474	6.69088	6.85304	8.20246	8.64229	8.75596	8.78539	8.484
ENSMUST00000036370	0.00254417	0.0163577	3.33461	down	Yes	chr17	T cell activation Rho GTPase activating protein [Source:MGI Symbol;Acc:MGI:3615484]	ENSMUSG00000033450	Tagap		chr17:7926000-7934897:+	NM_145968	3076	AGGCCCAGAAGGACCTGAACAATAAGGTTAAGATCTTGGTGGAATTCCTCATCGACAACT	GENCODE	+			ASMM10AP1B111934318V4	7934897	7926000	protein_coding	6.20931	24.7126	2.64975	4.38727	8.28148	5	5	5	7.76507	28.8869	35.3977	16.5435	23.1642	19.5708	3.05316	2.33065	2.33871	2.35905	3.16717	5.05991	5.39583	3.56862	4.02352	3.88844
ENSMUST00000031817	0.00154282	0.0123781	3.33116	down	Yes	chr6	hect domain and RLD 6 [Source:MGI Symbol;Acc:MGI:1914388]	ENSMUSG00000029798	Herc6		chr6:57581000-57664632:+	NM_025992	4767	GACAGCAATAATTGGAAATGCTACTTGTGACTGGAAACAATTTGAAAATAATTCAAAGTA	GENCODE	+	Nucleus		ASMM10AP1B108624692V4	57664632	57581000	protein_coding	58.287	249.179	5.93614	7.67216	46.0159	54.6996	28.2795	87.5058	74.9343	154.383	236.669	179.176	301.048	374.619	5.62766	5.78737	5.08821	6.72305	6.4544	7.35223	8.0303	7.02189	7.69134	8.26503
ENSMUST00000036031	0.000252082	0.00466756	3.32602	down	Yes	chr5	gamma-secretase activating protein [Source:MGI Symbol;Acc:MGI:2442259]	ENSMUSG00000039934	Gsap		chr5:21186289-21291723:+	NM_175437	3745	TTAGTTCAAATTAAATTTTTAAAAATCCTTTTTTGCTAATAAAACTCTGACAGTACACTT	GENCODE	+			ASMM10AP1B121186120V4	21291723	21186289	protein_coding	21.5629	91.8269	4.52473	6.25853	20.9834	15.449	14.4583	28.6672	28.2565	50.5563	77.8125	112.706	117.199	100.861	4.4597	3.89875	4.05828	5.14215	5.06478	5.80791	6.45712	6.36134	6.33907	6.32719
ENSMUST00000038144	0.00908545	0.0364389	3.32499	down	Yes	chr13	endothelial cell-specific molecule 1 [Source:MGI Symbol;Acc:MGI:1918940]	ENSMUSG00000042379	Esm1		chr13:113209659-113218098:+	NM_023612	2097	GTTAGGTTTTGTCTTAAAAGAACGGTGTATTATTGTTCAATAAAAATGGCACAGCTGTTC	GENCODE	+			ASMM10AP1B100065384V4	113218098	113209659	protein_coding	67.7459	267.416	6.00478	7.73813	51.7999	33.7914	27.1141	110.007	116.017	195.156	260.849	322.926	411.856	146.291	5.80884	5.07225	5.02485	7.05501	7.06295	7.68166	8.15598	7.82304	8.13198	6.898
ENSMUST00000138785	0.00137981	0.0116224	3.32401	down	Yes	chr10	DNA (cytosine-5-)-methyltransferase 3-like [Source:MGI Symbol;Acc:MGI:1859287]	ENSMUSG00000000730	Dnmt3l		chr10:78042287-78063622:+	NM_001081695	1822	CCAAAGGAGGTTTCTGCTCACTGGCCTCTCCCACTGTCTCAGGCAGGGTTCTGACGACCC	GENCODE	+		Yes	ASMM10AP1B113937541V4	78063622	78042287	protein_coding	549.224	3078.98	9.33419	11.0671	513.735	543.445	445.695	574.285	668.96	1088.67	3220.22	4478.03	5145.6	1462.38	9.21182	9.1921	9.34453	9.39428	9.5282	10.1203	11.7088	11.5188	11.7088	10.2788
ENSMUST00000112558	0.000665874	0.00763085	3.32118	down	No	chr9	ATPase, Ca++-sequestering [Source:MGI Symbol;Acc:MGI:1889008]	ENSMUSG00000032570	Atp2c1		chr9:105410438-105495094:-	NM_001253834	5642	AAGTTCACTAATGACTTCCCAGTTAGTATTGTTAATGCTAAAATTATAACTATAGATGCC	GENCODE	-	Nucleus		ASMM10AP1B104721299V4	105495094	105410438	protein_coding	16.1871	64.0848	4.0564	5.78809	15.8227	22.3913	7.44677	19.0029	16.2716	70.688	59.4091	57.1797	65.8545	67.2929	4.02519	4.44919	3.0147	4.5315	4.26143	6.2601	6.08315	5.36383	5.51811	5.71527
ENSMUST00000063117	1.71176e-05	0.00123899	3.32046	down	Yes	chr12	glutathione transferase zeta 1 (maleylacetoacetate isomerase) [Source:MGI Symbol;Acc:MGI:1341859]	ENSMUSG00000021033	Gstz1		chr12:87147718-87164723:+	NM_001364306	1656	CTCTGGACCCCGCTAGGCCTCAGTCATCTTCTAGTCCCGAGAGCTGACTTTCTTGGCCGG	GENCODE	+			ASMM10AP1B118100952V4	87164723	87147718	protein_coding	54.8564	255.555	5.95795	7.68934	55.1295	56.7267	44.4277	51.5489	66.4492	123.154	214.914	300.169	362.723	276.813	5.89604	5.843	5.78849	5.97161	6.29063	7.03171	7.89637	7.72853	7.95099	7.83908
ENSMUST00000034048	0.00154827	0.012398	3.31973	down	Yes	chr8	cilia and flagella associated protein 97 [Source:MGI Symbol;Acc:MGI:1914006]	ENSMUSG00000031631	Cfap97		chr8:46163651-46195590:+	NM_001357215	4619	GCGCAAGAGTCCGTGGCGGCCACAGTTCGCAGATACACTTTTGGCGTCATGGATCGGTTT	GENCODE	+			ASMM10AP1B112711346V4	46195590	46163651	protein_coding	8.06441	29.5764	2.95555	4.68661	14.9267	8.3062	5.46499	5	6.62413	35.8005	31.0904	23.4949	28.3858	29.1104	3.93349	2.96728	2.60332	2.35905	2.91459	5.34888	5.21857	4.07196	4.32057	4.47309
ENSMUST00000099678	0.0286708	0.0779877	3.31959	down	Yes	chr2	four jointed box 1 [Source:MGI Symbol;Acc:MGI:1341907]	ENSMUSG00000075012	Fjx1		chr2:102449366-102452499:-	NM_010218	3134	GCCTTCTGTGTGTATATATGTGCATAAATTGTGCTGTAAATAGACTAAACAAACTTATAT	GENCODE	-			ASMM10AP1B100033401V4	102452499	102449366	protein_coding	69.961	237.287	5.82148	7.55249	33.7567	30.3366	20.7617	175.896	89.054	162.148	234.396	340.534	326.673	122.681	5.16717	4.90278	4.60847	7.73204	6.69696	7.41401	8.01845	7.89904	7.80986	6.62108
ENSMUST00000168553	0.0128517	0.0454101	3.31945	down	Yes	chr4	glucocorticoid modulatory element binding protein 1 [Source:MGI Symbol;Acc:MGI:2135604]	ENSMUSG00000028901	Gmeb1		chr4:132221025-132252494:-		6523	AGCCATTCATTAAATAAACATTTGTAAGTACTGTCTATGTATAAGTACTAAACGCCAACT	GENCODE	-		Yes	ASMM10AP1B109446092V4	132252494	132221025	protein_coding	78.8361	275.744	6.11303	7.84397	52.9765	38.4601	22.7179	142.079	137.947	233.327	198.333	347.135	362.569	237.357	5.83846	5.25631	4.74413	7.42824	7.298	7.9407	7.78686	7.92262	7.95055	7.61912
ENSMUST00000087714	0.00205382	0.0145446	3.31904	down	Yes	chr13	histone cluster 1, H4j [Source:MGI Symbol;Acc:MGI:2448436]	ENSMUSG00000067455	Hist1h4j		chr13:21735064-21735837:+	NM_178210	774	GTTGATCTGGCTTTATAAACTATGCTGTCTCGGATGCAATAAAATTCTGAATAAAACTGC	GENCODE	+			ASMM10AP1B100110144V4	21735837	21735064	protein_coding	12.9489	53.3533	3.7392	5.46997	8.19325	9.76986	10.8363	19.5452	16.3998	63.6123	41.2835	57.928	72.1812	31.7612	3.03611	3.2104	3.60381	4.57302	4.27267	6.11446	5.60136	5.38291	5.64252	4.6086
ENSMUST00000067530	0.0151838	0.0505567	3.31889	down	Yes	chr2	vesicle-associated membrane protein, associated protein B and C [Source:MGI Symbol;Acc:MGI:1928744]	ENSMUSG00000054455	Vapb		chr2:173737511-173784336:+	NM_019806	7029	GGAGCCCGGCATCTGCTACGTACGTGCGTACGTGCGTGCGTCGGGGCGTGCGTGGGTACG	GENCODE	+			ASMM10AP1B127892294V4	173784336	173737511	protein_coding	20.5713	69.5984	4.16033	5.89103	9.55954	9.30934	10.1482	43.3694	30.4701	73.6445	62.5854	71.083	86.1222	54.5567	3.2631	3.13126	3.49949	5.73074	5.17706	6.31493	6.15416	5.68237	5.89623	5.40748
ENSMUST00000033804	0.0137933	0.0475611	3.31874	down	Yes	chrX	zinc finger, CCHC domain containing 18 [Source:MGI Symbol;Acc:MGI:1914245]	ENSMUSG00000031428	Zcchc18		chrX:136993298-136998472:+		4733	AGACCCTTCTCCTCCCTTCCTTTTGCTGTGGCGCAGTTTAGACTAGAGGCCCAGGGCACC	GENCODE	+			ASMM10AP1B111120580V4	136998472	136993298	protein_coding	3323.69	15095.1	11.5983	13.3289	1591	1794.06	1293.47	5749.9	6190.02	5252.04	4888.63	26406.1	27473.4	11455.3	10.9096	11.0393	11.0408	12.4535	12.5482	12.3998	12.3678	14.1599	14.248	13.4691
ENSMUST00000045142	0.000698949	0.00778206	3.31697	down	Yes	chr4	catenin (cadherin associated protein), alpha-like 1 [Source:MGI Symbol;Acc:MGI:1859649]	ENSMUSG00000038816	Ctnnal1		chr4:56810935-56865188:-	NM_018761	3664	GGGGCCACTGAAAACTTCCCAGGACTTAATTCACTTCCTAGAGGTTTTTGCTGCAGAGGG	GENCODE	-			ASMM10AP1B116063762V4	56865188	56810935	protein_coding	24.7971	98.2148	4.66914	6.399	36.6251	35.636	14.0305	13.8547	23.8394	101.419	97.1537	101.813	78.7301	111.958	5.27987	5.14765	4.00938	4.08742	4.82136	6.75908	6.7669	6.21671	5.76741	6.4849
ENSMUST00000102981	0.000320318	0.00528699	3.31676	down	Yes	chr2	Sec61, alpha subunit 2 (S. cerevisiae) [Source:MGI Symbol;Acc:MGI:1931071]	ENSMUSG00000025816	Sec61a2		chr2:5870987-5895432:-	NM_021305	2448	TGTTCGATTTAGTGGCAACTTCTTAGTAAACTTACTAGGACAGTGGGCCGATGTCAGTGG	GENCODE	-	Nucleus		ASMM10AP1B111738339V4	5895432	5870987	protein_coding	9.45876	38.2614	3.31956	5.04933	12.2275	8.47573	6.42288	10.4869	9.68083	44.4967	34.9556	45.3463	28.5295	37.979	3.63929	2.99961	2.78832	3.68211	3.48845	5.64276	5.37615	5.02522	4.32768	4.87487
ENSMUST00000211136	5.15451e-05	0.00212275	3.31659	down	No	chr8	RB transcriptional corepressor like 2 [Source:MGI Symbol;Acc:MGI:105085]	ENSMUSG00000031666	Rbl2		chr8:91070122-91123617:+	NM_001282000	4504	TCAGAAATTTTCCATTTTTGCTGGGTGCTTTTTATATATGCGAAAGGCCTGTCCGAGGAC	GENCODE	+	Nucleus	Yes	ASMM10AP1B117555690V4	91123617	91070122	protein_coding	10.8027	43.4055	3.50419	5.23389	14.3698	10.35	6.99417	9.50665	12.7928	39.0452	38.7121	49.5534	52.4397	37.2769	3.87793	3.29555	2.91283	3.5391	3.89552	5.46683	5.51321	5.15287	5.19153	4.84499
ENSMUST00000059231	0.000714072	0.00784567	3.31449	down	Yes	chr19	frequently rearranged in advanced T cell lymphomas 2 [Source:MGI Symbol;Acc:MGI:2673967]	ENSMUSG00000047604	Frat2		chr19:41845972-41848132:-	NM_177603	2161	GGTGGTCCTGATTTATAGGATTCATAATTAAAATGTCTGCTGAATAAATTTGGTTTTTGT	GENCODE	-			ASMM10AP1B100108974V4	41848132	41845972	protein_coding	207.012	895.772	7.78672	9.5155	164.054	185.925	94.5222	302.963	287.596	896.315	821.355	1085.04	1058.74	617.413	7.52977	7.54731	6.9577	8.53149	8.36732	9.82893	9.75016	9.52	9.46988	9.00855
ENSMUST00000097921	0.000462825	0.00633779	3.31339	down	Yes	chr4	cyclin dependent kinase inhibitor 2C [Source:MGI Symbol;Acc:MGI:105388]	ENSMUSG00000028551	Cdkn2c		chr4:109660876-109667189:-	NM_001301368	2471	CACCACTGTGAACAAGGGACCCTAAAGAATGGCCGAGCCTTGGGGGAACGAGTTGGCGTC	GENCODE	-			ASMM10AP1B118251204V4	109667189	109660876	protein_coding	9.0367	36.0794	3.24163	4.96994	10.8776	9.89436	6.39652	11.149	6.86609	40.0759	42.4462	35.922	32.515	29.4379	3.45771	3.23069	2.78254	3.76843	2.96876	5.50539	5.63802	4.69326	4.52114	4.49188
ENSMUST00000055390	0.0014406	0.01193	3.31183	down	Yes	chr12	ras homolog family member J [Source:MGI Symbol;Acc:MGI:1931551]	ENSMUSG00000046768	Rhoj		chr12:75308322-75401456:+	NM_023275	2350	GGGGGCTTTGGTTGTTTGTCTGTTGTTTAGAATTTCTGAAATATATTTTTGCTTCTTCTA	GENCODE	+			ASMM10AP1B100023367V4	75401456	75308322	protein_coding	1589.64	6197.71	10.6077	12.3354	965.183	1263.09	529.999	2905.23	2284.69	6427.89	4926.23	7469.08	7124.79	5040.53	10.1532	10.5101	9.6176	11.5596	11.1982	12.6981	12.3819	12.2366	12.1808	12.1794
ENSMUST00000064454	0.000110952	0.00310219	3.31091	down	Yes	chr5	GCN1 general control of amino-acid synthesis 1-like 1 (yeast) [Source:MGI Symbol;Acc:MGI:2444248]	ENSMUSG00000041638	Gcn1l1		chr5:115565254-115622654:+	NM_172719	8555	GGGAACCAGTACGTGCGCGAGGCTGCAGATGACTGTGCCAAAGCTGTGATGAGCAATTTG	GENCODE	+	Exosome		ASMM10AP1B109654389V4	115622654	115565254	protein_coding	5.09303	20.4783	2.42628	4.15351	5	5	5	5.46516	5	22.981	17.2884	23.4193	24.7812	13.9216	2.33259	2.33065	2.33871	2.78487	2.34458	4.74661	4.45501	4.06635	4.1208	3.37876
ENSMUST00000002840	0.000401407	0.00587228	3.30719	down	Yes	chr17	peroxisomal biogenesis factor 6 [Source:MGI Symbol;Acc:MGI:2385054]	ENSMUSG00000002763	Pex6		chr17:46711463-46725541:+	NM_145488	3200	TCAACATGTATGTGGGCCAAAGCGAGGAGAATGTCCGGGAAGTGTTTGCCAGGGCCAGGG	GENCODE	+	Cytoplasm		ASMM10AP1B109909136V4	46725541	46711463	protein_coding	12.1272	48.2711	3.6572	5.38281	12.8753	15.355	6.16704	12.6853	13.5533	57.6844	41.4149	45.2607	51.1301	45.8656	3.71697	3.88907	2.73164	3.96105	3.98728	5.98512	5.60512	5.02143	5.15252	5.14986
ENSMUST00000102798	0.000445041	0.00622165	3.30287	down	Yes	chr4	TEK receptor tyrosine kinase [Source:MGI Symbol;Acc:MGI:98664]	ENSMUSG00000006386	Tek		chr4:94739300-94874939:+	NM_013690	4654	CACCAGGCTGATTGTTCGGAGATGTGAAGCTCAGAAGTGGGGGCCCGACTGTAGCCGTCC	GENCODE	+			ASMM10AP1B102699566V4	94874939	94739300	protein_coding	6.5478	25.8682	2.78344	4.50716	6.08713	5	5	7.59066	9.0612	26.8521	26.2264	22.5869	30.7035	22.972	2.63247	2.33065	2.33871	3.22393	3.39145	4.96258	4.99149	4.01909	4.43297	4.12967
ENSMUST00000206399	0.00228794	0.0153509	3.29234	down	No	chr7	RIKEN cDNA 4931406P16 gene [Source:MGI Symbol;Acc:MGI:1924311]	ENSMUSG00000066571	4931406P16Rik		chr7:34237580-34313522:-		4158	GAGCTTGATTCGGTGTGCGTTTGGAGGTTTTTATGTGCCTTGAAAATAGTGTTGGGGCGA	GENCODE	-			ASMM10AP1B113862986V4	34313522	34237580	protein_coding	33.0059	126.235	5.03972	6.75883	29.3022	22.6693	13.878	54.0927	45.0875	121.166	99.2367	149.52	136.689	124.561	4.95352	4.46856	3.98953	6.04355	5.74343	7.00777	6.7981	6.7771	6.56466	6.64652
ENSMUST00000099356	4.06573e-05	0.0019064	3.28698	down	Yes	chr13	arrestin domain containing 3 [Source:MGI Symbol;Acc:MGI:2145242]	ENSMUSG00000074794	Arrdc3		chr13:80883410-80896042:+	NM_001042591	4101	AAACCATGTGGGAAATGATTTAACTTTTCCTATTGCTCTTCCTTGTGGAAAATAAAAGTG	GENCODE	+			ASMM10AP1B100058915V4	80896042	80883410	protein_coding	1846.64	8100.17	11.0284	12.7452	1629.6	2193.66	942.662	2001.47	2465.8	7220.76	8523.52	10548.1	8302.48	5905.95	10.9449	11.3217	10.5163	11.0479	11.3113	12.8791	13.2398	12.7554	12.4083	12.4432
ENSMUST00000074849	6.67799e-05	0.00243064	3.28313	down	Yes	chr5	transforming, acidic coiled-coil containing protein 3 [Source:MGI Symbol;Acc:MGI:1341163]	ENSMUSG00000037313	Tacc3		chr5:33658128-33672201:+	NM_001310541	2669	TGGAACTTCCTCGTCCCATCTCTCCAACTCTCAGTTTAAGGAGTCGGCCTGGAGGAAGCA	GENCODE	+	Nucleus;Axon		ASMM10AP1B110398234V4	33672201	33658128	protein_coding	160.049	800.371	7.51867	9.23374	143.175	161.124	133.363	164.992	197.591	393.176	574.544	1188.71	1274.89	570.533	7.31649	7.34188	7.49331	7.64184	7.79982	8.66232	9.25212	9.63741	9.73688	8.87997
ENSMUST00000048418	0.00255917	0.0164211	3.27624	down	Yes	chr6	importin 8 [Source:MGI Symbol;Acc:MGI:2444611]	ENSMUSG00000040029	Ipo8		chr6:148770683-148831467:-	NM_001081113	5360	TCATGTATTTCCATTATTAATGTCTAACCTGGGATATCTTCGAGCTAGATCCTGCTGGGT	GENCODE	-			ASMM10AP1B112063544V4	148831467	148770683	protein_coding	16.3374	62.6767	4.03671	5.74875	16.4314	10.9641	7.94	22.9357	23.4159	71.6656	60.0166	63.9692	66.7447	50.9873	4.08565	3.38417	3.10986	4.80955	4.7943	6.27671	6.09678	5.52468	5.53603	5.30954
ENSMUST00000201203	5.54291e-05	0.00223319	3.27111	down	Yes	chr5	transmembrane protein 214 [Source:MGI Symbol;Acc:MGI:1916046]	ENSMUSG00000038828	Tmem214		chr5:30868012-30879180:+	NM_144525	6110	TCCAGCAACTTTAGCTATGTGTTTTGCTAGCTTCTATTCTGCAGTGATTTAATTTGGGTT	GENCODE	+			ASMM10AP1B117693487V4	30879180	30868012	protein_coding	7.97377	30.9374	3.04036	4.75014	8.81992	10.7601	5	7.89661	7.39219	28.759	23.9328	41.0007	34.3921	26.6025	3.14277	3.35532	2.33871	3.27965	3.08534	5.0532	4.87641	4.88024	4.60054	4.34029
ENSMUST00000102917	0.000514658	0.00664484	3.2676	down	Yes	chr4	collagen, type XV, alpha 1 [Source:MGI Symbol;Acc:MGI:88449]	ENSMUSG00000028339	Col15a1		chr4:47208161-47313167:+	NM_009928	5172	AGGCCCGGGATGTACCACAGAACTTGGATTTGAGATTGAAGGCTCTGGGGACGTCCGGCT	GENCODE	+			ASMM10AP1B109396716V4	47313167	47208161	protein_coding	9.46973	36.056	3.26412	4.97236	7.18883	6.78274	8.45577	16.9824	7.93895	28.8855	28.6436	47.1993	37.2167	38.3347	2.84014	2.69377	3.20922	4.37782	3.19966	5.05979	5.1114	5.08647	4.71442	4.8897
ENSMUST00000169783	0.000821689	0.00852273	3.24657	down	No	chr18	potassium intermediate/small conductance calcium-activated channel, subfamily N, member 2 [Source:MGI Symbol;Acc:MGI:2153182]	ENSMUSG00000054477	Kcnn2		chr18:45560154-45685882:+		1625	CCTGCTTGGTCTGATCATCGTGTACCACGCCAGGGAAATACAGTACCATGATCAACAGGA	GENCODE	+	Cytoplasm		ASMM10AP1B112983445V4	45685882	45560154	protein_coding	8.40455	31.1208	3.07185	4.77076	13.6777	9.1532	5	5.29496	8.8969	31.7662	32.4163	26.6249	28.9583	35.8385	3.80106	3.10664	2.33871	2.74919	3.36362	5.18996	5.2757	4.25311	4.35152	4.78352
ENSMUST00000051937	0.00136823	0.0115714	3.24509	down	Yes	chr5	RAS-like, family 11, member B [Source:MGI Symbol;Acc:MGI:1916189]	ENSMUSG00000049907	Rasl11b		chr5:74195286-74199481:+	NM_026878	1812	TCCGATTCCTCACTAAACGATTCATCGGGGACTACGAACGAAATGCAGGTAATCTCTACA	GENCODE	+			ASMM10AP1B119397576V4	74199481	74195286	protein_coding	19.0473	77.2566	4.33206	6.03031	24.683	13.7383	12.7882	27.1332	16.8937	100.951	81.4641	71.3849	72.6661	59.8166	4.70033	3.72528	3.86311	5.05712	4.31444	6.7521	6.51961	5.68823	5.65262	5.53902
ENSMUST00000066497	0.000123988	0.00325329	3.24209	down	Yes	chr18	zinc finger protein 24 [Source:MGI Symbol;Acc:MGI:1929704]	ENSMUSG00000051469	Zfp24		chr18:24009702-24020810:-	NM_001357447	5732	GGGTCCCGAGCCAGAGGAGTACTTTTGAGGAAAACAGGGTATTTCTCTGAGGTGTATACC	GENCODE	-		Yes	ASMM10AP1B113765266V4	24020810	24009702	protein_coding	8.37812	32.6673	3.14446	4.84139	11.0292	8.75692	6.42634	6.28101	9.39711	33.8555	35.5016	30.5446	33.6288	29.8063	3.47995	3.04456	2.7895	2.96395	3.44435	5.27526	5.40077	4.45078	4.56977	4.51035
ENSMUST00000171600	0.0109952	0.0409598	3.24089	down	No	chr4	BTB and CNC homology, basic leucine zipper transcription factor 2 [Source:MGI Symbol;Acc:MGI:894679]	ENSMUSG00000040270	Bach2		chr4:32417435-32586108:+	NM_001109661	8493	TGTTTACTGAATTTTGTCTAGACGCCATTTCTGTTGATGAAATAAAGGCCTATCATTCTA	GENCODE	+	Exosome	Yes	ASMM10AP1B100158486V4	32586108	32417435	protein_coding	92.1221	328.282	6.41035	8.10674	73.0631	56.4171	25.825	164.935	140.37	384.137	262.078	294.736	405.911	294.546	6.30707	5.83441	4.94572	7.6415	7.32305	8.63357	8.1624	7.70454	8.10896	7.92424
ENSMUST00000079324	0.00039441	0.00582853	3.23691	down	Yes	chr5	ubiquitin-like 3 [Source:MGI Symbol;Acc:MGI:1344373]	ENSMUSG00000001687	Ubl3	Yes	chr5:148504635-148552662:-	NM_011908	2537	AGCACAAACCGATCAGAATTGTGAAGGTTCTTTTTTATTTTTTCCGTAGTTCCAGCACTT	GENCODE	-			ASMM10AP1B121886597V4	148552662	148504635	protein_coding	64.763	267.022	6.13286	7.82747	85.8997	66.0268	33.3317	59.1001	79.4569	300.666	286.084	273.87	250.661	223.828	6.54986	6.07427	5.33706	6.16584	6.53725	8.29608	8.27674	7.60569	7.42766	7.53119
ENSMUST00000040131	0.00131038	0.0112299	3.23592	down	Yes	chr14	E74-like factor 1 [Source:MGI Symbol;Acc:MGI:107180]	ENSMUSG00000036461	Elf1	Yes	chr14:79481194-79582494:+	NM_007920	4235	CTGACGCTAGTCAGGGACAAGAAGACCTAGTGAATGATTTCAGAAAACGTGCCTGTTTTC	GENCODE	+		Yes	ASMM10AP1B103156639V4	79582494	79481194	protein_coding	32.9501	128.767	5.10408	6.79825	32.4703	31.7508	14.373	46.3053	39.851	142.796	125.592	126.222	117.786	131.438	5.10636	4.97265	4.04945	5.8247	5.56723	7.2456	7.14027	6.52791	6.34384	6.73364
ENSMUST00000046038	0.000809104	0.00846042	3.23088	down	Yes	chr19	solute carrier family 25, member 28 [Source:MGI Symbol;Acc:MGI:2180509]	ENSMUSG00000040414	Slc25a28		chr19:43663822-43674881:-	NM_145156	1514	AGCCATATTGCCAATGGTGCAGCCGGATGTGTGGCGACATTACTTCATGATGCAGCCATG	GENCODE	-			ASMM10AP1B100808345V4	43674881	43663822	protein_coding	12.3289	46.4226	3.64525	5.33718	19.5607	13.9961	5.65093	10.6861	11.7504	43.314	49.7431	50.889	46.8001	41.3667	4.3513	3.75596	2.63831	3.70993	3.77076	5.60992	5.84946	5.18884	5.03167	5.00599
ENSMUST00000202543	0.0087549	0.0356513	3.22966	down	No	chr5	YES proto-oncogene 1, Src family tyrosine kinase [Source:MGI Symbol;Acc:MGI:99147]	ENSMUSG00000014932	Yes1		chr5:32611171-32685577:+	NM_001205132	2657	CGGCCGGACTCAGATTTGATAATGGGCTGCATTAAAAGTAAAGAAAACAAAAGTCCAGCC	GENCODE	+	Nucleus		ASMM10AP1B105146961V4	32685577	32611171	protein_coding	12.9494	44.9883	3.57805	5.26944	12.3394	6.68467	5	21.0653	19.6578	33.3566	42.5464	52.3084	59.2682	37.4621	3.65252	2.67735	2.33871	4.68251	4.53917	5.25589	5.64245	5.22745	5.36785	4.85355
ENSMUST00000176161	0.00159566	0.0125965	3.22511	down	Yes	chr14	early B cell factor 2 [Source:MGI Symbol;Acc:MGI:894332]	ENSMUSG00000022053	Ebf2		chr14:67233586-67430918:+	NM_001360202	5204	TGCTTTGTCAGTTACATACAGTATAAAGTTGCTATGCACAGAGCTTTTTGTAAAGACAGC	GENCODE	+	Cytoplasm	Yes	ASMM10AP1B100103939V4	67430918	67233586	protein_coding	173.698	719.301	7.52516	9.21451	166.433	92.9338	101.984	275.881	231.255	676.585	783.439	824.93	773.933	537.62	7.55382	6.5724	7.07527	8.39259	8.03172	9.43214	9.68971	9.13496	9.02173	8.79401
ENSMUST00000188931	0.000173712	0.00381575	3.2206	down	Yes	chr1	DnaJ heat shock protein family (Hsp40) member B2 [Source:MGI Symbol;Acc:MGI:1928739]	ENSMUSG00000026203	Dnajb2		chr1:75236406-75245688:+	NM_001159883	3066	ACCCTCTCTCCTGTCACCCACCCCTGCTCTCTCCCCAGATGTGTTCTGAGCTGGATATCC	GENCODE	+			ASMM10AP1B116600959V4	75245688	75236406	protein_coding	22276.7	73922.3	14.3812	16.0685	14169.3	14691.6	10404.4	35156.4	36961.6	44923.2	55966.7	102799	103567	62355.3	14.0507	14.0158	13.917	14.923	14.9996	15.7669	16.0532	16.2494	16.2939	15.9793
ENSMUST00000029405	0.000160575	0.0037082	3.22034	down	Yes	chr3	guanine monophosphate synthetase [Source:MGI Symbol;Acc:MGI:2448526]	ENSMUSG00000027823	Gmps		chr3:63976106-64022579:+	NM_001033300	8105	GAGCCCTTTGTCAAGGTGTATTTGTCTACATTGCAATGACTCATTTACTCCACTTTGTGG	GENCODE	+	Nucleus		ASMM10AP1B100131023V4	64022579	63976106	protein_coding	129.761	559.061	7.15607	8.84328	113.376	121.973	74.5066	174.468	164.481	588.719	469.946	728.928	601.599	406.113	6.96525	6.95959	6.59494	7.71975	7.54082	9.24048	8.96451	8.96237	8.6684	8.38066
ENSMUST00000070116	3.09446e-05	0.00172464	3.21997	down	Yes	chr18	suppressor of cytokine signaling 6 [Source:MGI Symbol;Acc:MGI:1924885]	ENSMUSG00000056153	Socs6		chr18:88865169-88894322:-		6036	AGTTGTCTTGACTTTCTTCTGTATAATCTTTACAGTGTGCTGTGTTTGACCATTCTAACT	GENCODE	-			ASMM10AP1B114610147V4	88894322	88865169	protein_coding	63.1384	267.545	6.14195	7.82899	61.3885	58.5201	44.7963	67.4909	83.4962	284.63	238.025	310.099	290.609	214.363	6.05579	5.89079	5.80208	6.35467	6.6064	8.22075	8.03729	7.77176	7.64172	7.47345
ENSMUST00000029186	0.00026684	0.00479737	3.21649	down	Yes	chr2	DEAH (Asp-Glu-Ala-His) box polypeptide 35 [Source:MGI Symbol;Acc:MGI:1918965]	ENSMUSG00000027655	Dhx35		chr2:158794807-158858214:+	NM_145742	3212	CGGGGTTCTTTGCGAATGCAGCCCGGTTTCACTCCAGTGGAGCCTATCGGGTTATCTACA	GENCODE	+			ASMM10AP1B107780156V4	158858214	158794807	protein_coding	5.81122	23.3668	2.64304	4.32853	5.51444	5	5	7.0287	6.51298	22.7723	20.5486	27.9985	30.5711	14.9434	2.53779	2.33065	2.33871	3.11961	2.88842	4.7332	4.67152	4.32615	4.42636	3.48539
ENSMUST00000151524	0.000602868	0.00721504	3.21566	down	Yes	chr13	SMC5-SMC6 complex localization factor 1 [Source:MGI Symbol;Acc:MGI:2145448]	ENSMUSG00000021597	Slf1		chr13:77043088-77135473:-	NM_134071	3747	CAAAGATGAATTTTCATAAAACTAATCTGAAAGGGGAAACAGCTCTGCATAGAGTTTGCA	GENCODE	-	Cytoplasm	Yes	ASMM10AP1B114862281V4	77135473	77043088	protein_coding	37.5876	154.952	5.36137	7.04649	46.635	38.9938	23.8232	30.3081	48.1781	166.752	200.332	130.17	132.129	145.38	5.6496	5.27706	4.81473	5.22597	5.83949	7.45716	7.80041	6.573	6.51337	6.88849
ENSMUST00000098135	0.000333817	0.00541494	3.20754	down	Yes	chr7	RNA binding motif protein, X-linked-like 2 [Source:MGI Symbol;Acc:MGI:1923822]	ENSMUSG00000073894	Rbmxl2		chr7:107209445-107210916:+	NM_029660	1472	CGTTTAATTTCATTTTGGAATTGTTAAACGTTTCAACAAGCTCGTGTTAAAAGTATGACT	GENCODE	+		Yes	ASMM10AP1B100093464V4	107210916	107209445	protein_coding	475.535	2175.76	9.03285	10.7143	392.65	481.981	229.573	642.525	630.949	2001.11	1002.02	2801.64	3078.37	1995.67	8.83454	8.99334	8.33978	9.54503	9.45159	10.9532	10.026	10.8423	10.9933	10.7567
ENSMUST00000030313	0.00298243	0.0180872	3.19658	down	Yes	chr4	caspase activity and apoptosis inhibitor 1 [Source:MGI Symbol;Acc:MGI:1915020]	ENSMUSG00000028578	Caap1		chr4:94500081-94556796:-	NM_026368	2107	TGGAATCAAAACAAGGCAAAGGGGAAGATAGTGATGTACTCAGTATAAATGCAGATGCTT	GENCODE	-			ASMM10AP1B113417209V4	94556796	94500081	protein_coding	41.1052	162.408	5.43224	7.10877	45.5215	45.7981	17.2057	41.9153	55.0853	209.372	187.224	130.314	132.001	153.128	5.61172	5.52015	4.31413	5.68703	6.02816	7.7844	7.70417	6.57529	6.51214	6.96783
ENSMUST00000047857	0.0010603	0.00979458	3.19126	down	Yes	chr5	F-box and leucine-rich repeat protein 5 [Source:MGI Symbol;Acc:MGI:2152883]	ENSMUSG00000039753	Fbxl5		chr5:43744616-43782150:-	NM_001159963	2858	ACAACATTAACGGTCCTCATGCTGACACCGCCAGTGGATGCCAGAATTTGCAGTGTGGTT	GENCODE	-			ASMM10AP1B102387524V4	43782150	43744616	protein_coding	219.921	944.169	7.92524	9.59937	289.318	285.41	149.453	132.859	242.566	1010.39	1223.77	747.293	710.674	1028.72	8.3803	8.14764	7.66664	7.32321	8.10841	10.0135	10.3044	9.00002	8.9123	9.76657
ENSMUST00000096114	0.00014933	0.00356708	3.18933	down	Yes	chr19	renalase, FAD-dependent amine oxidase [Source:MGI Symbol;Acc:MGI:1915045]	ENSMUSG00000071573	Rnls		chr19:33137747-33392265:-	NM_001167818	1597	AGCACCAAAATTTTTATGAGGAACTGTTAGCTCATGGAATTTTGAAGCCTCTGACATCCC	GENCODE	-			ASMM10AP1B110657198V4	33392265	33137747	protein_coding	28.1132	114.903	4.95291	6.62616	32.7645	28.5599	24.6401	19.5654	35.0363	125.017	128.088	109.045	99.1672	113.199	5.11995	4.817	4.87015	4.57424	5.3832	7.05104	7.16354	6.31232	6.10249	6.5014
ENSMUST00000045366	0.000127706	0.00330021	3.18869	down	Yes	chr8	DCN1, defective in cullin neddylation 1, domain containing 2 (S. cerevisiae) [Source:MGI Symbol;Acc:MGI:2142792]	ENSMUSG00000038506	Dcun1d2		chr8:13255964-13287841:-	NM_001024504	2748	AGATCTTTGGAACACATTTCTGCTGGAGCATCACAAAAGATCAATTCCAAGGGATACTTG	GENCODE	-			ASMM10AP1B102397934V4	13287841	13255964	protein_coding	31.5643	130.666	5.13585	6.80882	33.6341	32.8182	25.075	26.9047	39.3897	144.735	149.737	120.467	115.929	122.459	5.1601	5.02581	4.89725	5.04438	5.55173	7.26286	7.38364	6.45606	6.32288	6.61864
ENSMUST00000023611	0.00889449	0.0360174	3.18741	down	Yes	chr16	a disintegrin-like and metallopeptidase (reprolysin type) with thrombospondin type 1 motif, 5 (aggrecanase-2) [Source:MGI Symbol;Acc:MGI:1346321]	ENSMUSG00000022894	Adamts5		chr16:85856173-85901828:-	NM_011782	10791	CTCTGTGAAATTAAACTGTATACCTAACTGCTGTTTCAGTGGACATAATAAATAGAAATT	GENCODE	-	Exosome		ASMM10AP1B100019057V4	85901828	85856173	protein_coding	110.832	405.668	6.71651	8.38889	98.5204	41.7072	50.3847	177.862	185.687	374.115	362.912	521.607	482.973	286.731	6.75042	5.37634	5.99151	7.74617	7.71809	8.59659	8.60538	8.49891	8.35731	7.88627
ENSMUST00000106847	3.31661e-05	0.00175354	3.18417	down	Yes	chr7	tripartite motif-containing 34B [Source:MGI Symbol;Acc:MGI:4821264]	ENSMUSG00000090215	Trim34b		chr7:104329471-104336909:+	NM_001243916	1827	CTTTGTCTTGAAGAAACGTGACAAAGTCTATTAGCCACTAACTCATCCTTGTTGTTTAAG	GENCODE	+			ASMM10AP1B100093614V4	104336909	104329471	protein_coding	61.4561	265.749	6.13	7.80092	72.3972	62.3001	49.2398	60.4343	62.9089	188.104	311.957	211.766	314.837	302.078	6.29179	5.98615	5.95862	6.1971	6.21635	7.62978	8.40337	7.25304	7.75645	7.96197
ENSMUST00000017946	4.84945e-05	0.00205858	3.18234	down	Yes	chr11	reticulophagy regulator family member 3 [Source:MGI Symbol;Acc:MGI:1915248]	ENSMUSG00000017802	Retreg3		chr11:101096513-101119893:-	NM_026501	3165	TAGCTGAAGTCTGGGTTAGTGGGACCATTTTCATAAGGAATCTTTTGCTTTTCAAAAAGC	GENCODE	-			ASMM10AP1B100137012V4	101119893	101096513	protein_coding	5.39064	20.9167	2.54746	4.21755	5	5.65038	5	6.1702	5.13262	19.2074	22.1719	22.2164	20.2922	20.6957	2.33259	2.52407	2.33871	2.9398	2.60215	4.5031	4.77878	3.99765	3.83757	3.97068
ENSMUST00000107812	0.0165028	0.0535637	3.18162	down	Yes	chr3	intraflagellar transport 80 [Source:MGI Symbol;Acc:MGI:1915509]	ENSMUSG00000027778	Ift80		chr3:68892499-69004543:-	NM_026641	4063	GTTTCAAAAGAAAAAAATGGTTAAATTTTATGTTTAGTATGTTTACCACAATAAAAAGGT	GENCODE	-	Exosome		ASMM10AP1B119651898V4	69004543	68892499	protein_coding	233.459	897.37	7.72052	9.39029	157.662	116.58	66.4398	421.058	405.555	514.934	438.846	1334.47	1425.83	772.774	7.46901	6.89427	6.41972	8.97058	8.84904	9.03558	8.86437	9.80441	9.89551	9.35155
ENSMUST00000023426	0.000176904	0.00384134	3.1791	down	Yes	chr16	claudin domain containing 1 [Source:MGI Symbol;Acc:MGI:2447860]	ENSMUSG00000022744	Cldnd1		chr16:58727910-58734251:+	NR_045518	2147	GGTCGGAGCTGGAGGGCGAAGCCGGTGGAGTGAGAGGATGGGCGAGCAGTCTGAATGCCA	GENCODE	+	Nucleus		ASMM10AP1B126866709V4	58734251	58727910	protein_coding	11.1318	42.5408	3.55235	5.22097	13.9554	8.33824	7.86262	12.7851	12.7175	42.0961	39.254	43.1284	43.7804	44.4453	3.83448	2.97458	3.09435	3.97238	3.88596	5.57299	5.53174	4.95328	4.94122	5.10561
ENSMUST00000058016	2.53052e-05	0.00151096	3.17616	down	Yes	chr5	purinergic receptor P2X, ligand-gated ion channel, 2 [Source:MGI Symbol;Acc:MGI:2665170]	ENSMUSG00000029503	P2rx2		chr5:110339813-110342976:-	NM_001310700	1895	GGAGCCGGCACCGCCCTATCCCACAGGTACGTCTTCATCGTGCAGAAAAGCTACCAGGAT	GENCODE	-			ASMM10AP1B108648744V4	110342976	110339813	protein_coding	31.7234	137.103	5.14707	6.81436	32.8662	32.868	24.059	31.3599	37.464	85.4649	122.805	178.03	197.225	101.991	5.12432	5.02896	4.83152	5.27337	5.4772	6.51717	7.10694	7.01363	7.08836	6.34571
ENSMUST00000102517	0.0009824	0.00940272	3.17112	down	Yes	chr2	delta like canonical Notch ligand 4 [Source:MGI Symbol;Acc:MGI:1859388]	ENSMUSG00000027314	Dll4		chr2:119325784-119335962:+	NM_019454	3747	TGTTTGATATCAGAAGAGAGGAACGAGTGTGTGATTGCCACAGAGGTATAAGGCAGGAGC	GENCODE	+			ASMM10AP1B101320849V4	119335962	119325784	protein_coding	11.4158	42.7922	3.55699	5.22198	11.4234	9.95578	5.94144	14.394	15.3646	47.9101	39.1283	43.6802	43.9197	39.3226	3.53283	3.23819	2.69037	4.14586	4.17769	5.73724	5.52716	4.97157	4.94588	4.92805
ENSMUST00000098242	0.00223739	0.01517	3.17079	down	Yes	chr4	gamma-glutamyl hydrolase [Source:MGI Symbol;Acc:MGI:1329035]	ENSMUSG00000073987	Ggh		chr4:20042052-20066750:+	NM_010281	1965	TTCAGCCCCAGAAATAGAGTATTTGGTTTGTGTCTAATAAATGGTGCTTATAACTGGTTC	GENCODE	+			ASMM10AP1B100050338V4	20066750	20042052	protein_coding	13.5195	50.1906	3.76204	5.42688	8.61117	13.5261	7.20677	17.2419	21.0117	50.5399	44.4169	63.3429	55.4177	37.2354	3.11064	3.70123	2.959	4.39914	4.64019	5.80747	5.70228	5.50898	5.27278	4.8429
ENSMUST00000156859	1.19436e-05	0.00105487	3.17038	down	Yes	chr5	hydroxyacyl-Coenzyme A dehydrogenase/3-ketoacyl-Coenzyme A thiolase/enoyl-Coenzyme A hydratase (trifunctional protein), alpha subunit [Source:MGI Symbol;Acc:MGI:2135593]	ENSMUSG00000025745	Hadha		chr5:30118304-30155162:-	NM_178878	4017	AAAGAATAAGAGTTTGAATTCTGAAATGGATAATATCTTGGCAAATCTGAGGCTGCCTGC	GENCODE	-			ASMM10AP1B116595121V4	30155162	30118304	protein_coding	384.742	1693.85	8.7632	10.4279	414.62	377.285	211.234	454.07	466.502	1575.11	1291.02	2153.94	1910.83	1538.34	8.91689	8.57948	8.20638	9.07046	9.04278	10.631	10.3749	10.4761	10.3023	10.355
ENSMUST00000217316	0.0162873	0.0530743	3.17031	down	Yes	chr1	olfactory receptor 1410 [Source:MGI Symbol;Acc:MGI:3031244]	ENSMUSG00000063583	Olfr1410		chr1:92605782-92614806:+	NM_146491	7927	ACACAATGAGTTTCAGGAAAGTACCCTGTCTTGATAAACACTCTGCCCTAGTGCTCTCTC	GENCODE	+			ASMM10AP1B107414337V4	92614806	92605782	protein_coding	46.1944	258.28	5.72476	7.38938	45.2057	45.5817	53.8483	40.7713	45.5652	57.4415	397.519	300.345	438.197	97.8988	5.60072	5.51192	6.09936	5.65031	5.76147	5.97963	8.73296	7.72917	8.22197	6.28318
ENSMUST00000029387	5.63526e-05	0.00223615	3.16471	down	Yes	chr3	eukaryotic translation initiation factor 2A [Source:MGI Symbol;Acc:MGI:1098684]	ENSMUSG00000027810	Eif2a		chr3:58525821-58557501:+	NM_001005509	2299	ACCCCAGCGCGTGGGTTTCTCTTTCCGGGACAAGATGGCGCCGTCCACACCGCTGTTGAC	GENCODE	+	Nucleus		ASMM10AP1B121329059V4	58557501	58525821	protein_coding	8.31052	31.3769	3.1265	4.78858	9.79344	11.4903	5.70502	7.22778	7.336	30.5055	30.3337	33.6528	28.0891	34.3036	3.30129	3.4549	2.64529	3.15802	3.07302	5.13414	5.18553	4.59559	4.3042	4.72343
ENSMUST00000015100	0.000564861	0.00698368	3.16461	down	Yes	chr5	protein phosphatase 1 catalytic subunit beta [Source:MGI Symbol;Acc:MGI:104871]	ENSMUSG00000014956	Ppp1cb	Yes	chr5:32458843-32495523:+	NM_172707	5962	AGTTGTCTAATTGATACAACGTCTGAGTGATTATTCTGTGTTGTTTTGTTTTACAGTGAG	GENCODE	+			ASMM10AP1B115619093V4	32495523	32458843	protein_coding	132.963	539.499	7.15237	8.81439	130.414	118.001	60.4956	193.52	162.382	522.107	539.334	618.212	569.126	448.718	7.17211	6.91401	6.27396	7.88118	7.52057	9.05822	9.16404	8.73263	8.59545	8.52163
ENSMUST00000108633	0.0037537	0.0209485	3.16437	down	Yes	chr11	phospholipid scramblase 3 [Source:MGI Symbol;Acc:MGI:1917560]	ENSMUSG00000019461	Plscr3		chr11:69846617-69852058:+	NM_023564	2785	TTTAAACAGTAGAAGCCGGATGTGATGGGAGAGGGTAGATACCGGATAACACAAAGGGAG	GENCODE	+			ASMM10AP1B103578119V4	69852058	69846617	protein_coding	30.6653	113.686	4.92837	6.59028	32.1096	16.6413	14.1485	49.8265	40.6004	116.423	85.8053	126.241	144.191	95.7684	5.09059	4.00713	4.02273	5.92805	5.59333	6.94751	6.59418	6.52815	6.63741	6.24416
ENSMUST00000155551	0.000405902	0.00590659	3.16054	down	Yes	chr4	DDB1 and CUL4 associated factor 10 [Source:MGI Symbol;Acc:MGI:2140179]	ENSMUSG00000035572	Dcaf10		chr4:45342101-45379759:+	NM_153167	7250	GCACATGAAGATTGTGTGAATAATATCAGATTTCTTGATAACCGGCTCTTTGCTACCTGC	GENCODE	+			ASMM10AP1B114394648V4	45379759	45342101	protein_coding	17.0116	65.6485	4.16026	5.82044	20.7478	17.3658	8.65549	18.9893	19.2997	63.4267	65.6668	74.8377	69.0847	55.2265	4.44066	4.07102	3.24789	4.53001	4.51173	6.10956	6.22184	5.76018	5.58687	5.42373
ENSMUST00000038388	0.000524314	0.00669712	3.15965	down	Yes	chr10	WASH complex subunit 4 [Source:MGI Symbol;Acc:MGI:2441787]	ENSMUSG00000034560	Washc4		chr10:83543941-83596473:+	NM_001033375	5858	TAGAGACAACTGGAGTTCATTTTCAGACTATGTATGAGCACTTGGGAGAACTGCTAACAG	GENCODE	+			ASMM10AP1B110364588V4	83596473	83543941	protein_coding	11.9531	45.9596	3.65848	5.31825	12.1844	12.5572	7.12001	13.3187	14.585	50.9477	45.8258	38.5917	41.3525	53.0804	3.63325	3.58797	2.93887	4.03307	4.09926	5.82095	5.74288	4.79764	4.8631	5.36667
ENSMUST00000060579	0.00309873	0.0184906	3.1585	down	Yes	chr12	mannoside acetylglucosaminyltransferase 2 [Source:MGI Symbol;Acc:MGI:2384966]	ENSMUSG00000043998	Mgat2		chr12:69184157-69186770:+	NM_146035	2614	CTAATCATTTTGCAGAATCTTCTATTTGTATCAATAAAGGCATTCTAGGAGTTTTGAGAA	GENCODE	+	Nucleus		ASMM10AP1B100065388V4	69186770	69184157	protein_coding	73.8121	275.706	6.19752	7.85675	49.7359	59.2163	29.5903	117.755	112.762	247.706	234.214	331.496	351.885	213.227	5.75024	5.9065	5.16001	7.15198	7.01884	8.02839	8.01784	7.86097	7.91101	7.46556
ENSMUST00000215746	0.00186288	0.0138371	3.15421	down	No	chr9	activin receptor IIB [Source:MGI Symbol;Acc:MGI:87912]	ENSMUSG00000061393	Acvr2b		chr9:119402444-119434995:+	NM_001313757	3175	GTGTTGTCTTGTAGGAAGTATATTTTAATGTAAGTTGACTTTTATGACGAGGAAGTTTAA	GENCODE	+	Nucleus		ASMM10AP1B100015967V4	119434995	119402444	protein_coding	269.762	1072.19	8.11692	9.7742	233.619	207.526	103.556	456.281	347.826	1030.89	884.278	1317.61	1345.51	782.66	8.06946	7.69967	7.10049	9.07792	8.63707	10.043	9.86028	9.78549	9.81197	9.37028
ENSMUST00000227843	0.000409996	0.00592809	3.15372	down	Yes	chr15	NudC domain containing 1 [Source:MGI Symbol;Acc:MGI:1914679]	ENSMUSG00000038736	Nudcd1		chr15:44373163-44427873:-	NM_026149	5077	ATCATGTACTTAGCTCATTGTTTAGATTGGTACAGTCATTATGTAGAATGTTTGGGTAGT	GENCODE	-			ASMM10AP1B114469305V4	44427873	44373163	protein_coding	118.45	481.656	6.99906	8.65611	119.775	112.968	55.8264	143.055	160.628	522.139	450.13	532.851	434.855	468.304	7.05013	6.84887	6.15096	7.43834	7.50697	9.05876	8.90357	8.52692	8.21229	8.57902
ENSMUST00000025739	0.00041644	0.00598699	3.14773	down	Yes	chr19	ubiquitin-like, containing PHD and RING finger domains 2 [Source:MGI Symbol;Acc:MGI:1923718]	ENSMUSG00000024817	Uhrf2	Yes	chr19:30030513-30093722:+	NM_144873	3536	GCCACCAAAAGGCCAGCTTCAGATGATGAGTGTCCAGGTGACTCCAAAGTGCTGAAGGCA	GENCODE	+	Nucleus	Yes	ASMM10AP1B101255893V4	30093722	30030513	protein_coding	12.9156	51.8245	3.80633	5.46065	14.8959	14.2894	12.3993	13.6977	9.296	64.0381	49.0037	38.2278	42.0276	65.8254	3.92999	3.78652	3.81246	4.07055	3.43216	6.12381	5.8301	4.78459	4.88349	5.68125
ENSMUST00000089581	0.00100753	0.00955527	3.14528	down	Yes	chr2	PC-esterase domain containing 1A [Source:MGI Symbol;Acc:MGI:2442177]	ENSMUSG00000037773	Pced1a		chr2:130417683-130424278:-	NM_178762	3496	GAAACTCCTACACTTAAAATCTGTCCTAAAAAGAATAAAGAGATTTTATTTTGGCTGTCA	GENCODE	-			ASMM10AP1B100099180V4	130424278	130417683	protein_coding	21.6088	83.5364	4.49194	6.14513	24.7535	26.3575	9.46688	24.9529	22.5134	79.1849	79.1798	104.967	94.9262	59.4239	4.70384	4.69626	3.38743	4.93479	4.73739	6.41464	6.48331	6.26288	6.03635	5.52848
ENSMUST00000022145	0.000174063	0.00381575	3.14263	down	Yes	chr13	small EDRK-rich factor 1 [Source:MGI Symbol;Acc:MGI:1337114]	ENSMUSG00000021643	Serf1		chr13:100108012-100114238:+	NM_011353	601	CTTCAGCGCCCGGCGGCAACGGCTGAGCGTGCAAAGCCGCCGTTTGCTTCTCCAGGTCGC	GENCODE	+	Exosome		ASMM10AP1B124874884V4	100114238	100108012	protein_coding	17.5437	70.6292	4.22268	5.87466	20.5617	15.3002	11.1374	15.6583	25.0611	61.3328	42.4741	96.2688	94.7336	58.3368	4.42654	3.88337	3.6478	4.26044	4.89527	6.06863	5.63943	6.13023	6.03276	5.50223
ENSMUST00000129492	0.00337344	0.0195708	3.1417	down	Yes	chr10	small ubiquitin-like modifier 3 [Source:MGI Symbol;Acc:MGI:1336201]	ENSMUSG00000020265	Sumo3		chr10:77606225-77616307:+	NM_001301673	487	CCGCCGTCGCTGCGCAACCATGTCGGAAGAGAAGCCCAAGGTAAGCCCGGAGGGTGTGAA	GENCODE	+	Cytoplasm		ASMM10AP1B126629640V4	77616307	77606225	protein_coding	15.5212	57.7781	3.9744	5.62595	13.6889	12.6218	7.84761	18.6413	24.8066	63.1928	70.1731	56.3427	52.9233	46.2589	3.80226	3.59402	3.09176	4.50515	4.87882	6.10431	6.31273	5.34278	5.20694	5.16297
ENSMUST00000066412	0.00535996	0.0261552	3.14066	down	Yes	chr13	angiotensin II receptor, type 1a [Source:MGI Symbol;Acc:MGI:87964]	ENSMUSG00000049115	Agtr1a		chr13:30336441-30382867:+	NM_177322	2199	GGAAACAGCTTGGTGGTGATCGTCATCTACTTTTACATGAAGCTGAAGACTGTGGCCAGT	GENCODE	+			ASMM10AP1B103302498V4	30382867	30336441	protein_coding	38.6804	143.669	5.29009	6.94115	46.5402	33.351	13.3177	52.7514	47.4416	147.421	179.956	133.723	135.746	121.5	5.64675	5.04998	3.92803	6.00598	5.81969	7.28844	7.63962	6.61506	6.55395	6.60869
ENSMUST00000115645	0.000186254	0.00392212	3.13794	down	Yes	chr16	RAN binding protein 1 [Source:MGI Symbol;Acc:MGI:96269]	ENSMUSG00000005732	Ranbp1		chr16:18239784-18248732:-	NM_011239	1085	TGGAAACACTTATTTATAGTCATCAAAAATAGTGAATAAAAAATGCCTTTGAAAACCTGG	GENCODE	-			ASMM10AP1B122103824V4	18248732	18239784	protein_coding	1401.99	5659.07	10.5243	12.1741	1062.56	985.499	662.199	2188.37	2111.34	4484.79	4432.07	7103.27	7572.98	4702.25	10.2979	10.1132	9.961	11.1669	11.0822	12.1634	12.2062	12.1657	12.2714	12.0636
ENSMUST00000015877	0.000681583	0.00769364	3.13714	down	Yes	chr6	capping protein (actin filament) muscle Z-line, alpha 2 [Source:MGI Symbol;Acc:MGI:106222]	ENSMUSG00000015733	Capza2	Yes	chr6:17636983-17666972:+	NM_007604	2537	GTCTTGGCATCAGGATTTTTAAGGAAAATGAACTGATAACATTAATTCTATGTCTAGATT	GENCODE	+	Nucleus		ASMM10AP1B100153672V4	17666972	17636983	protein_coding	390.566	1584.25	8.69667	10.3461	359.962	321.24	166.792	545.647	559.19	1479.36	1622.37	1757.95	1822.01	1239.57	8.71203	8.32767	7.84224	9.31475	9.28665	10.5479	10.7104	10.1978	10.2325	10.042
ENSMUST00000110463	2.29835e-05	0.00144468	3.13586	down	Yes	chr2	COP9 signalosome subunit 2 [Source:MGI Symbol;Acc:MGI:1330276]	ENSMUSG00000027206	Cops2		chr2:125830304-125859139:-	NM_001285507	3392	TCTCCACTTCTAAACAGAATTCTGATTTTTTATGTCAGATGGATTTACTGCAGGAATTTT	GENCODE	-	Nucleus	Yes	ASMM10AP1B123422453V4	125859139	125830304	protein_coding	180.67	764.144	7.67573	9.32459	206.704	179.613	112.363	187.48	217.191	762.168	739.408	832.938	724.595	761.608	7.88343	7.49749	7.22616	7.83324	7.93833	9.6083	9.60449	9.14853	8.93566	9.32597
ENSMUST00000118174	0.000145967	0.00353784	3.13478	down	Yes	chr5	putative homeodomain transcription factor 2 [Source:MGI Symbol;Acc:MGI:1916020]	ENSMUSG00000039987	Phtf2		chr5:20758663-20882124:-	NM_172992	4840	ACCAGCAAGAAATACAGCAATACCTCAATCCTACTTACGGAACAGATAAACCTCTACTTG	GENCODE	-	Nucleus	Yes	ASMM10AP1B116902982V4	20882124	20758663	protein_coding	65.7178	274.994	6.2136	7.86197	79.2612	79.5153	47.979	56.682	65.1517	280.535	352.719	252.437	238.316	250.965	6.42945	6.3492	5.91436	6.109	6.266	8.19509	8.56731	7.49308	7.357	7.69735
ENSMUST00000145353	0.00104532	0.00970642	3.13244	down	Yes	chr11	CCR4-NOT transcription complex, subunit 6 [Source:MGI Symbol;Acc:MGI:2144529]	ENSMUSG00000020362	Cnot6	Yes	chr11:49671503-49712723:-	NM_001363356	5736	TGTCAGGTACTGCAAAAAGAATTTCAACAGAACAACCACCTCCAAGATCTTGGATCATGT	GENCODE	-	Nucleus	Yes	ASMM10AP1B120433374V4	49712723	49671503	protein_coding	26.6002	106.365	4.84778	6.49507	41.1745	23.7842	18.8077	26.9772	22.2575	125.202	126.443	87.7896	80.0301	112.361	5.46407	4.54313	4.46006	5.04822	4.72343	7.05347	7.14833	5.99303	5.79033	6.49019
ENSMUST00000107545	1.38101e-05	0.00109713	3.13235	down	Yes	chr11	mediator complex subunit 1 [Source:MGI Symbol;Acc:MGI:1100846]	ENSMUSG00000018160	Med1		chr11:98152155-98193293:-	NM_001080118	8024	TGGGAAGCTTTTCTCTCTTTCTGTCTTCATCCCAGATCAAAGAATCCCGAGTTAGGATCT	GENCODE	-	Nucleus	Yes	ASMM10AP1B114016029V4	98193293	98152155	protein_coding	64.0747	264.972	6.17545	7.8227	67.1899	70.9219	44.2712	64.5592	73.4311	243.555	286.884	280.975	273.752	239.691	6.19048	6.18284	5.78285	6.29276	6.42831	8.00522	8.28239	7.64118	7.5549	7.62978
ENSMUST00000047714	0.011181	0.0413781	3.1295	down	Yes	chr1	lysine (K)-specific demethylase 5B [Source:MGI Symbol;Acc:MGI:1922855]	ENSMUSG00000042207	Kdm5b		chr1:134560171-134635285:+	NM_152895	8714	CAACTTCGAGAGATTTCATGTGTAACTTGTAAAGAAAATGCTGCTTAAAACATTCTAAGC	GENCODE	+		Yes	ASMM10AP1B100091371V4	134635285	134560171	protein_coding	10.3904	36.5374	3.28351	4.92944	8.57703	5	5	15.2382	18.1366	31.0159	30.1155	45.7626	54.2311	21.5616	3.10498	2.33065	2.33871	4.22181	4.42142	5.15449	5.17912	5.04013	5.24118	4.0323
ENSMUST00000130320	8.42618e-05	0.00268354	3.12885	down	Yes	chr10	F-box protein 7 [Source:MGI Symbol;Acc:MGI:1917004]	ENSMUSG00000001786	Fbxo7		chr10:86021972-86051873:+	NM_001347151	5388	CCACGTTGGGGTTCAGTTCTGATACCCGATTTGCAATTACATTGAACAACAAGGATGCCC	GENCODE	+		Yes	ASMM10AP1B102675368V4	86051873	86021972	protein_coding	5.31455	19.2543	2.45262	4.09825	5	5	5	5	6.57277	18.2907	20.8257	19.8515	18.863	18.4404	2.33259	2.33065	2.33871	2.35905	2.90208	4.44199	4.68961	3.83312	3.73143	3.79509
ENSMUST00000073152	0.00182802	0.0136938	3.12717	down	Yes	chr2	FAST kinase domains 1 [Source:MGI Symbol;Acc:MGI:2444596]	ENSMUSG00000027086	Fastkd1		chr2:69686815-69712606:-	NM_177244	2865	TGCTGCTGGATAGGATCGCTTCAGTGGCCATTCAGCAGGTTGAAAAGATCCATCCCTTTT	GENCODE	-	Nucleus		ASMM10AP1B110165219V4	69712606	69686815	protein_coding	21.2698	82.5415	4.47674	6.1216	30.6674	29.4157	19.0956	11.4295	15.7409	105.579	92.6022	73.3185	56.8336	84.3742	5.022	4.85874	4.48416	3.80641	4.21239	6.81201	6.70105	5.72854	5.31028	6.05611
ENSMUST00000102997	0.000431862	0.00613394	3.12594	down	Yes	chr4	cyclin C [Source:MGI Symbol;Acc:MGI:1858199]	ENSMUSG00000028252	Ccnc		chr4:21727726-21750546:+	NM_016746	3365	ACCTCCAAACAGTGAAGGTGAGCAGGGTCCAAATGGAAGTCAGAACTCTAGCTACAGCCA	GENCODE	+	Nucleus	Yes	ASMM10AP1B112615511V4	21750546	21727726	protein_coding	11.3219	43.7527	3.59462	5.2389	14.0758	11.3009	8.77573	8.67153	13.7853	50.284	48.4853	46.0144	32.9377	41.0424	3.84698	3.42621	3.26906	3.41664	4.01419	5.80047	5.81365	5.04872	4.53822	4.99347
ENSMUST00000163257	0.00473503	0.0242257	3.12308	down	Yes	chr13	family with sequence similarity 172, member A [Source:MGI Symbol;Acc:MGI:1915925]	ENSMUSG00000064138	Fam172a		chr13:77708690-78163655:+	NM_138312	1436	GCAGCATTGAAAGATTTGCTGTCTAGGATCGATTTGGATGAACTCATGAAAAAGGACGAA	GENCODE	+			ASMM10AP1B107420139V4	78163655	77708690	protein_coding	9.03307	31.7871	3.14178	4.78475	16.608	5	5	8.84745	9.70993	33.609	35.1239	36.2165	31.4452	22.5411	4.10162	2.33065	2.33871	3.44484	3.49308	5.26559	5.38357	4.70396	4.4702	4.10045
ENSMUST00000118316	0.000410654	0.0059293	3.12288	down	Yes	chr5	NEDD4 binding protein 2-like 2 [Source:MGI Symbol;Acc:MGI:2687207]	ENSMUSG00000029655	N4bp2l2	Yes	chr5:150635972-150665612:-	NM_201369	8982	GCTGTAAGTGTTGTGGAAATTACATGTTTTCCTTCTTTGATGCTCTAAATTAATTTTCAA	GENCODE	-			ASMM10AP1B100148017V4	150665612	150635972	protein_coding	158.203	659.527	7.43597	9.07885	138.954	137.484	88.1543	224.462	201.961	664.569	645.914	804.96	732.063	450.129	7.26671	7.11723	6.85705	8.10265	7.83624	9.40334	9.41378	9.10343	8.94799	8.52572
ENSMUST00000037299	2.96159e-06	0.000482883	3.11806	down	Yes	chr2	YTH domain family 1 [Source:MGI Symbol;Acc:MGI:1917431]	ENSMUSG00000038848	Ythdf1		chr2:180904377-180920949:-	NM_173761	3184	CAGCTTATCAGTCAGATTGACCTAATGCAAAATATAAATATTCTTCAAAACAAAACACCT	GENCODE	-			ASMM10AP1B104014710V4	180920949	180904377	protein_coding	167.532	709.846	7.57982	9.22047	176.341	186.094	117.187	166.202	191.836	702.015	663.911	779.996	687.714	715.597	7.64462	7.54813	7.29191	7.65293	7.76152	9.48674	9.45885	9.05964	8.86437	9.23275
ENSMUST00000052168	0.00225307	0.0152269	3.1178	down	Yes	chr2	OTU domain containing 1 [Source:MGI Symbol;Acc:MGI:1918448]	ENSMUSG00000043415	Otud1		chr2:19657752-19660583:+	NM_027715	2832	ATTTGTACAATGTAGCAGTTCTCAGCTGATGGAATGAATGAATAAAATGTATACTTTTAC	GENCODE	+			ASMM10AP1B100014744V4	19660583	19657752	protein_coding	625.012	2471.08	9.35423	10.9948	520.98	495.23	246.425	975.26	887.163	2914.91	2726.35	2169.43	2294.54	2250.2	9.23495	9.04473	8.44991	10.1162	9.92536	11.5045	11.4676	10.4838	10.564	10.954
ENSMUST00000050073	0.000991417	0.00946136	3.1151	down	Yes	chr3	DnaJ heat shock protein family (Hsp40) member B4 [Source:MGI Symbol;Acc:MGI:1914285]	ENSMUSG00000028035	Dnajb4		chr3:152183955-152193845:-	NM_025926	2464	AGATACCCAGCTTGCTTTATTTTCTCAGGATCATTGTGTTGCTAAGCCTGGGGACGCTGT	GENCODE	-	Nucleus		ASMM10AP1B116665140V4	152193845	152183955	protein_coding	29.0623	113.338	4.95966	6.59894	33.012	26.9983	16.3359	27.2287	41.7365	115.636	132.476	114.508	85.9828	118.09	5.13197	4.73367	4.23606	5.06277	5.63383	6.93787	7.21433	6.38055	5.89383	6.56811
ENSMUST00000102769	0.000283303	0.00498614	3.11328	down	Yes	chr2	methylmalonic aciduria (cobalamin deficiency) cblD type, with homocystinuria [Source:MGI Symbol;Acc:MGI:1923786]	ENSMUSG00000026766	Mmadhc		chr2:50279881-50296717:-	NM_133839	1342	GCAGTGGGGCAAGAATTTGCGTCCGCCTTCTTCACTAGAAATGGCCCATGTGCTCTGTAA	GENCODE	-			ASMM10AP1B111772023V4	50296717	50279881	protein_coding	174.736	741.572	7.62587	9.26431	195.74	178.089	111.319	176.851	211.683	838.022	918.211	689.212	629.673	632.743	7.79898	7.483	7.20889	7.73902	7.89945	9.74088	9.91541	8.88151	8.73898	9.04473
ENSMUST00000087155	0.00202325	0.0144456	3.11237	down	Yes	chr19	frequently rearranged in advanced T cell lymphomas [Source:MGI Symbol;Acc:MGI:109450]	ENSMUSG00000067199	Frat1		chr19:41829970-41832583:+	NM_008043	2614	TTATAGGATTTTAACTGAAATAACTGTTTTTGAATAAATGTGTTGGGTTCCCCTCACACA	GENCODE	+			ASMM10AP1B100185721V4	41832583	41829970	protein_coding	102.074	407.793	6.71782	8.35584	82.0287	62.465	53.7271	149.867	162.283	362.456	260.51	583.83	545.856	286.311	6.47912	5.99084	6.09436	7.50532	7.51947	8.55637	8.15363	8.65266	8.53202	7.88452
ENSMUST00000031680	0.000284902	0.00499766	3.10993	down	Yes	chr6	inhibitor of growth family, member 3 [Source:MGI Symbol;Acc:MGI:1919027]	ENSMUSG00000029670	Ing3		chr6:21949571-21976038:+	NM_023626	3800	TAATTCTCTGACATCGTGATGTGGCAGTTAATTAACTCTTAAATCACTCTGGGCTTTGTG	GENCODE	+		Yes	ASMM10AP1B116703051V4	21976038	21949571	protein_coding	16.5752	64.5427	4.1535	5.79038	17.6534	22.688	11.6065	12.7526	18.1752	68.7998	74.2921	61.8236	52.3956	65.4023	4.19243	4.46939	3.71256	3.96863	4.42448	6.22472	6.39443	5.4715	5.18986	5.67139
ENSMUST00000037548	0.000939347	0.00917936	3.10973	down	Yes	chr10	ring finger protein 146 [Source:MGI Symbol;Acc:MGI:1915281]	ENSMUSG00000038876	Rnf146	Yes	chr10:29344178-29362442:-	NM_001110197	4402	CGGGCCGGACCGAGAAAGGGCTATGTGACATTGTTTTTGAGGATGTGGAAATGGAACCGT	GENCODE	-	Nucleus		ASMM10AP1B112849944V4	29362442	29344178	protein_coding	11.8366	43.387	3.60031	5.2371	10.4105	9.14866	7.11634	17.4916	15.0159	47.745	33.1253	45.3901	45.0823	45.5921	3.39247	3.10567	2.93771	4.42171	4.14397	5.73234	5.30581	5.02674	4.98035	5.14025
ENSMUST00000000058	2.02268e-05	0.00132106	3.10626	down	Yes	chr6	caveolin 2 [Source:MGI Symbol;Acc:MGI:107571]	ENSMUSG00000000058	Cav2		chr6:17281185-17289115:+	NM_016900	2733	TGCGGGTATCCTGTTTGCTACCCTCAGCTGTCTGCACATCTGGATCCTGATGCCTTTTGT	GENCODE	+			ASMM10AP1B109098464V4	17289115	17281185	protein_coding	71.5937	303.945	6.35542	7.9906	76.4596	62.1823	63.2549	83.8453	72.2265	246.901	329.062	380.493	333.663	229.607	6.37404	5.98301	6.34862	6.66321	6.40824	8.02229	8.47551	8.04645	7.83929	7.56946
ENSMUST00000102824	0.027213	0.0753811	3.10546	down	Yes	chr19	interferon-induced protein with tetratricopeptide repeats 1 [Source:MGI Symbol;Acc:MGI:99450]	ENSMUSG00000034459	Ifit1		chr19:34640871-34650009:+	NM_008331	2656	GAGTTTCCTCCCTGATGGATTATGATCTCTAAGTGTAAGTCAAATAAACATATTCCCCTC	GENCODE	+			ASMM10AP1B100047302V4	34650009	34640871	protein_coding	351.17	1292.43	8.25647	9.89127	191.501	187.534	95.0612	726.225	555.531	596.554	1366.02	940.511	2598.92	960.135	7.76761	7.55757	6.96762	9.71253	9.27701	9.25969	10.4654	9.33129	10.7325	9.66741
ENSMUST00000112632	0.000236809	0.00451991	3.10374	down	No	chr2	potassium inwardly-rectifying channel, subfamily J, member 3 [Source:MGI Symbol;Acc:MGI:104742]	ENSMUSG00000026824	Kcnj3		chr2:55437165-55598140:+	NM_001304810	4068	TCCGCTGCAAGCTGCTCAAAGAATGACTTGTCAAGCTCGAACATCATACACAGAGGACGA	GENCODE	+			ASMM10AP1B103744505V4	55598140	55437165	protein_coding	25.3717	101.051	4.78859	6.4226	37.2646	21.3896	23.0263	19.1394	26.0388	100.36	111.394	118.292	102.853	72.357	5.30747	4.38134	4.76319	4.54273	4.94821	6.7442	6.96451	6.42945	6.15274	5.82209
ENSMUST00000069309	0.000427423	0.0060977	3.10326	down	Yes	chrY	ubiquitously transcribed tetratricopeptide repeat gene, Y chromosome [Source:MGI Symbol;Acc:MGI:894810]	ENSMUSG00000068457	Uty		chrY:1097144-1245718:-	NM_009484	5208	TATTCCTGCTTGTTCAATCTGGTGTGTGTTGGGAGACTTACGCATTAAAATTTATTATTA	GENCODE	-		Yes	ASMM10AP1B100152142V4	1245718	1097144	protein_coding	448.727	1878.62	8.93488	10.5687	439.632	423.221	196.261	573.555	610.964	1928.61	1834.87	2179.22	2155.24	1295.17	9.00337	8.7769	8.09409	9.39222	9.40784	10.9054	10.8773	10.4892	10.4708	10.1008
ENSMUST00000114750	0.000171717	0.00381575	3.10248	down	Yes	chr16	glycogen synthase kinase 3 beta [Source:MGI Symbol;Acc:MGI:1861437]	ENSMUSG00000022812	Gsk3b	Yes	chr16:38090288-38240779:+		1750	CCCCAGGAGTGCGGGTCTTCCGGCCCCGAACTCCACCAGAGGCAATTGCACTGTGCAGCC	GENCODE	+	Nucleus		ASMM10AP1B126425304V4	38240779	38090288	protein_coding	50.9157	204.477	5.80962	7.44304	65.259	65.1416	58.481	34.6615	31.0354	167.21	217.711	244.575	224.106	168.78	6.15096	6.05123	6.22415	5.41809	5.20365	7.46157	7.91718	7.44999	7.27273	7.11372
ENSMUST00000042261	0.00845431	0.0349337	3.1006	down	Yes	chr10	solute carrier family 2 (facilitated glucose transporter), member 12 [Source:MGI Symbol;Acc:MGI:3052471]	ENSMUSG00000037490	Slc2a12		chr10:22645011-22704285:+	NM_178934	4167	AGACTAAGGGATGCTCTTTGGAACAAATATCAGTGGAGCTAGCAAAGGCGAACTATGTGA	GENCODE	+			ASMM10AP1B100746253V4	22704285	22645011	protein_coding	11.563	40.8386	3.48583	5.11838	20.1792	10.6787	5.30216	6.05233	15.6028	54.5255	46.1802	32.6224	29.8613	41.0036	4.40069	3.34496	2.57063	2.9133	4.1996	5.90904	5.75232	4.54566	4.39264	4.99224
ENSMUST00000072311	0.00302635	0.0182501	3.09666	down	Yes	chr5	YES proto-oncogene 1, Src family tyrosine kinase [Source:MGI Symbol;Acc:MGI:99147]	ENSMUSG00000014932	Yes1		chr5:32611184-32687057:+	NM_009535	4586	TGGAGCGAGCGGATTTGATAATGGGCTGCATTAAAAGTAAAGAAAACAAAAGTCCAGCCA	GENCODE	+	Nucleus		ASMM10AP1B111575064V4	32687057	32611184	protein_coding	10.1794	36.2627	3.32606	4.95677	11.0132	6.17084	5	14.3213	14.3917	26.6174	30.4328	47.7903	46.5638	29.9093	3.47775	2.59878	2.33871	4.13796	4.07709	4.95102	5.18895	5.10388	5.025	4.515
ENSMUST00000007012	0.000152747	0.00359708	3.0963	down	Yes	chr17	superoxide dismutase 2, mitochondrial [Source:MGI Symbol;Acc:MGI:98352]	ENSMUSG00000006818	Sod2		chr17:13007817-13020134:+	NM_013671	5861	AGTAATCCTCTATTTAGTGGACATCACCTAGTAGTCTTTGTTTATGGTCACAGTTTCACA	GENCODE	+			ASMM10AP1B113984099V4	13020134	13007817	protein_coding	180.15	750.23	7.65319	9.28374	204.95	187.65	100.038	187.429	220.682	815.486	805.445	811.577	726.001	592.641	7.86898	7.55883	7.04375	7.83278	7.96161	9.69958	9.72354	9.11384	8.93861	8.94312
ENSMUST00000172332	0.00153493	0.0123563	3.09346	down	Yes	chr12	coiled-coil domain containing 71 like [Source:MGI Symbol;Acc:MGI:1919373]	ENSMUSG00000090946	Ccdc71l		chr12:32378704-32382943:+	NM_001162903	4240	GACAGTTTAATGTGCATATGAATGAGATTTACAATTTGGTTGTGTGTTGCTTTTTAACTT	GENCODE	+	Cytoplasm		ASMM10AP1B100050613V4	32382943	32378704	protein_coding	521.05	2077.97	9.0692	10.6984	429.036	435.563	186.707	765.123	788.822	2079.08	1644.51	2550.47	2628.53	1487.25	8.96729	8.82074	8.02278	9.77222	9.76297	11.0128	10.7299	10.7007	10.7442	10.3044
ENSMUST00000038403	3.05996e-05	0.00172265	3.09191	down	Yes	chr6	islet cell autoantigen 1 [Source:MGI Symbol;Acc:MGI:96391]	ENSMUSG00000062995	Ica1		chr6:8630527-8778484:-	NM_010492	2075	CGGTCCTCTCATCCTTGATCCGCCCCAAACCAGGTGAGACCACCGCCCTCCCCCACCAGG	GENCODE	-	Nucleus		ASMM10AP1B123120855V4	8778484	8630527	protein_coding	2019.1	8801.01	11.2287	12.8572	2061.99	1832.82	1764.09	1895.04	2541.58	6736.76	9866.4	9942.89	11521.8	5937.16	11.2778	11.0676	11.4775	10.9747	11.346	12.7795	13.466	12.6643	12.9244	12.452
ENSMUST00000001115	0.000112397	0.00312539	3.09029	down	Yes	chr13	G protein-coupled receptor kinase 6 [Source:MGI Symbol;Acc:MGI:1347078]	ENSMUSG00000074886	Grk6		chr13:55445338-55460927:+	NM_001038018	2994	CCAAGAAGGGATTGCTACAGAGACTCTTCAGTCGCCAAAGGATTGCTGTGGGAACTGCAG	GENCODE	+	Cytoplasm		ASMM10AP1B123969481V4	55460927	55445338	protein_coding	5.9592	21.8072	2.64119	4.26893	9.17166	5	5.16925	5.45509	5	22.7151	19.0099	25.7988	21.8572	19.6551	3.1999	2.33065	2.5481	2.78271	2.34458	4.72954	4.57302	4.20535	3.94154	3.89521
ENSMUST00000161240	0.00506005	0.0252399	3.09025	down	Yes	chr10	polypeptide N-acetylgalactosaminyltransferase 4 [Source:MGI Symbol;Acc:MGI:894692]	ENSMUSG00000090035	Galnt4		chr10:99108159-99113247:+	NM_015737	5089	GTCTGTAATATTGGCGAAGACATGCAATAAAATGTATGCCTAATTATTTTTGCAAACCAA	GENCODE	+			ASMM10AP1B100203352V4	99113247	99108159	protein_coding	260.151	973.729	7.99067	9.61839	179.045	144.816	108.474	492.161	376.258	885.956	712.408	1259.8	1291.51	718.968	7.66802	7.19024	7.16835	9.18012	8.74661	9.81628	9.55403	9.72387	9.75702	9.24075
ENSMUST00000040468	0.00595413	0.0279016	3.0855	down	Yes	chr8	primase and polymerase (DNA-directed) [Source:MGI Symbol;Acc:MGI:3603756]	ENSMUSG00000038225	Primpol		chr8:46575619-46617200:-	NM_001001184	3772	ACAAATTAATAGAAATATATGTGGTGTTTGTGGACTGAAAATATTAAGGTGCCCACATTA	GENCODE	-			ASMM10AP1B116079631V4	46617200	46575619	protein_coding	28.8185	106.785	4.8296	6.4551	21.6215	20.5223	12.6022	49.7311	39.6154	86.733	90.2404	157.34	132.576	67.0363	4.50705	4.31913	3.83936	5.92471	5.55776	6.53772	6.66271	6.84814	6.51742	5.70954
ENSMUST00000018710	0.00067019	0.00765923	3.08507	down	Yes	chr11	solute carrier family 2 (facilitated glucose transporter), member 4 [Source:MGI Symbol;Acc:MGI:95758]	ENSMUSG00000018566	Slc2a4		chr11:69942543-69948149:-	NM_009204	2524	TGGACCTGTAACTTCATTGTCGGCATGGGTTTCCAGTATGTTGCGGATGCTATGGGTCCT	GENCODE	-			ASMM10AP1B102741963V4	69948149	69942543	protein_coding	176.629	709.367	7.57838	9.20368	213.049	167.753	76.4501	200.505	225.388	717.455	752.227	773.278	739.26	564.618	7.93054	7.39439	6.63396	7.93978	7.99323	9.52058	9.62767	9.04808	8.95805	8.86404
ENSMUST00000102491	4.67375e-07	0.000206699	3.08212	down	Yes	chr4	ciliary rootlet coiled-coil, rootletin [Source:MGI Symbol;Acc:MGI:3529431]	ENSMUSG00000040860	Crocc		chr4:141016637-141053722:-	NM_172122	6582	CTGCTCAGCCCAGCAGCCTGGCATTGGTGTGTTAGTGCGTTGGTGCATGTAGCTGAGACG	GENCODE	-			ASMM10AP1B117727216V4	141053722	141016637	protein_coding	25.7902	102.9	4.84124	6.46516	26.3706	32.0366	21.3538	23.5685	25.6212	102.725	84.7451	115.388	111.014	100.627	4.79577	4.98689	4.64838	4.8478	4.92736	6.77617	6.57796	6.39174	6.25662	6.32331
ENSMUST00000029565	0.000164809	0.00374403	3.07868	down	Yes	chr3	solute carrier family 50 (sugar transporter), member 1 [Source:MGI Symbol;Acc:MGI:107417]	ENSMUSG00000027953	Slc50a1		chr3:89268246-89270570:-	NM_009057	1022	TCCGCAGCTCCGGGTCTGAGCTACTGGAACTCCGCGCTGGGCTAGGGAACCGGCTCCGGT	GENCODE	-			ASMM10AP1B125582009V4	89270570	89268246	protein_coding	5.50417	19.8095	2.51235	4.13466	5.60413	5	5	5	6.9167	19.8897	21.4787	20.3711	20.0231	17.2849	2.55263	2.33065	2.33871	2.35905	2.98073	4.55167	4.73333	3.86826	3.81995	3.70011
ENSMUST00000135930	0.0022441	0.0151847	3.07844	down	No	chr5	ATPase, aminophospholipid transporter (APLT), class I, type 8A, member 1 [Source:MGI Symbol;Acc:MGI:1330848]	ENSMUSG00000037685	Atp8a1		chr5:67618140-67847370:-	NM_009727	8069	TGTGAAACTTAGTTATACTTTGCTGTGTTTTAATTAACCTTCAGCAGTTATTAAAGTGGA	GENCODE	-	Exosome		ASMM10AP1B113643379V4	67847370	67618140	protein_coding	20.3569	73.8472	4.36671	5.98891	22.2452	19.1073	7.95267	25.8234	26.6558	63.648	75.4295	78.6666	84.0625	67.4294	4.5455	4.21051	3.11201	4.98271	4.98283	6.11505	6.41557	5.83183	5.86375	5.71834
ENSMUST00000164828	0.000185567	0.00392045	3.07841	down	Yes	chr3	peroxisomal biogenesis factor 2 [Source:MGI Symbol;Acc:MGI:107486]	ENSMUSG00000040374	Pex2		chr3:5560188-5576150:-	NM_001163305	2051	AATCACATTGGCAACAGTTGATGTCCACAGGATCCATGCCTCTAGTACAGCATCTGAGGA	GENCODE	-			ASMM10AP1B105643100V4	5576150	5560188	protein_coding	165.272	705.555	7.57243	9.19462	196.482	176.545	132.102	150.4	170.832	834.205	836.952	643.953	572.816	639.849	7.80603	7.46901	7.47991	7.50962	7.59759	9.73531	9.779	8.79161	8.60404	9.06314
ENSMUST00000050205	1.18198e-05	0.00105121	3.07743	down	Yes	chr5	nudix (nucleoside diphosphate linked moiety X)-type motif 1 [Source:MGI Symbol;Acc:MGI:109280]	ENSMUSG00000036639	Nudt1		chr5:140331909-140338137:+	NM_001356584	954	CCGGGAAACTTTGGCTGGGGCGCGAAGGCTCTGCCATTTGACCTCGGAGCACTAGTTTTC	GENCODE	+	Cytoplasm		ASMM10AP1B116031499V4	140338137	140331909	protein_coding	8.26199	31.7522	3.1126	4.73432	8.86045	12.1046	7.77334	6.69876	5.87283	16.4248	22.3207	37.9942	45.2729	36.7482	3.14967	3.53202	3.07813	3.05115	2.75201	4.30207	4.78632	4.77445	4.98706	4.8217
ENSMUST00000195975	0.00722229	0.0314576	3.07688	down	Yes	chr3	PDZ and LIM domain 5 [Source:MGI Symbol;Acc:MGI:1927489]	ENSMUSG00000028273	Pdlim5	Yes	chr3:142242680-142391808:-	NM_001190852	1845	AGTCAAGTAGCCATAGTTTCTAAGGAAGCAGCCACTTACTCTAGTGTAAGCAGGTCTACA	GENCODE	-	Nucleus	Yes	ASMM10AP1B106993697V4	142391808	142242680	protein_coding	13.6966	43.7593	3.63406	5.25553	18.2625	22.4396	6.8798	5	15.9011	43.3145	40.009	45.3726	38.2963	51.8042	4.24518	4.45291	2.88525	2.35905	4.2279	5.61007	5.55681	5.02593	4.75325	5.33158
ENSMUST00000014221	0.000122864	0.00325119	3.06776	down	Yes	chr2	calcineurin-like EF hand protein 1 [Source:MGI Symbol;Acc:MGI:1927185]	ENSMUSG00000014077	Chp1		chr2:119547697-119587027:+	NM_019769	2609	CCCCCGCGCTCCACCCCTTGTTTCTCTCCCCGGGCCGCAAGAGAAACAGTGCCCTCTCCC	GENCODE	+			ASMM10AP1B124001270V4	119587027	119547697	protein_coding	873.333	4171.08	9.98263	11.5998	747.538	850.761	612.018	899.578	1256.77	2458.13	2887.07	6703.77	6373.77	2432.67	9.78333	9.88904	9.83565	10.0039	10.4012	11.2546	11.5407	12.0964	12.0411	11.0663
ENSMUST00000141158	0.000118307	0.00320227	3.06662	down	Yes	chr8	adhesion G protein-coupled receptor L1 [Source:MGI Symbol;Acc:MGI:1929461]	ENSMUSG00000013033	Adgrl1		chr8:83900105-83941954:+	NM_181039	8181	CAATTTTGGGTCGAGTGCATTTAACGAGAATAAAACAAAAGGCTCATAAGAACGTTTCAG	GENCODE	+			ASMM10AP1B100017785V4	83941954	83900105	protein_coding	949.791	3977.41	10.053	11.6697	933.134	905.696	467.437	1336.3	1106.39	4557.36	3144.37	4971	4274.45	2939.87	10.0992	9.97679	9.41654	10.5402	10.2325	12.1849	11.6718	11.6538	11.4814	11.3565
ENSMUST00000219577	0.000973655	0.0093776	3.06566	down	No	chr10	hect domain and RLD 4 [Source:MGI Symbol;Acc:MGI:1914595]	ENSMUSG00000020064	Herc4	Yes	chr10:63243923-63317878:+	NM_030114	3914	AGGAATGACTATATCAACTGGGTCCAGCAGCAAGCCTATGGAGTGGATGTCAGCCATGGA	GENCODE	+	Nucleus		ASMM10AP1B111616049V4	63317878	63243923	protein_coding	15.4826	58.8248	4.03714	5.65334	19.4927	15.2751	9.04678	14.2042	19.3944	63.5413	70.1084	50.1506	50.6928	59.6312	4.34494	3.88149	3.3151	4.12368	4.52049	6.11237	6.31167	5.16862	5.14011	5.53392
ENSMUST00000042662	0.000183335	0.003908	3.06516	down	Yes	chr14	mitotic spindle organizing protein 1 [Source:MGI Symbol;Acc:MGI:1924039]	ENSMUSG00000033186	Mzt1		chr14:99034544-99046120:-	NM_175245	2240	GGCCTCGGCCAACCTGAACGCGGTGAGGGAGACCATGGACGTTCTGCTTGAGATTTCAAG	GENCODE	-	Nucleus		ASMM10AP1B107108980V4	99046120	99034544	protein_coding	102.663	413.797	6.82633	8.4423	127.145	102.754	57.1932	101.992	124.229	424.343	460.403	408.321	394.944	380.972	7.13507	6.70939	6.18989	6.93548	7.16184	8.76603	8.93194	8.14813	8.07663	8.28876
ENSMUST00000106058	0.000597551	0.00717553	3.06451	down	Yes	chr3	zinc finger, RAN-binding domain containing 2 [Source:MGI Symbol;Acc:MGI:1858211]	ENSMUSG00000028180	Zranb2		chr3:157534160-157548410:+	NM_017381	2924	CCGTGAGTCAACTATCAAGTGTTGTTTATTAGAAATAAAATAGAAAGTTGTAAGCTCTGA	GENCODE	+	Nucleus	Yes	ASMM10AP1B111030328V4	157548410	157534160	protein_coding	450.031	1822.63	8.90689	10.5226	358.009	365.604	214.03	707.548	604.964	1837.37	1544.42	2256.52	2153.01	1321.84	8.70583	8.53049	8.22659	9.67623	9.39532	10.8379	10.6424	10.5346	10.4697	10.1282
ENSMUST00000053413	0.00507802	0.0252858	3.05969	down	Yes	chr11	cyclin-dependent kinase 5, regulatory subunit 1 (p35) [Source:MGI Symbol;Acc:MGI:101764]	ENSMUSG00000048895	Cdk5r1		chr11:80477023-80481184:+	NM_009871	4162	CCTTATTTTTATTTATTTTTGTACTGTGCTGATTCAATAAAATGCACTGACCATCCGTCA	GENCODE	+	Nucleus		ASMM10AP1B100083005V4	80481184	80477023	protein_coding	30.5223	109.519	4.90972	6.5231	19.1644	26.947	12.7644	46.0107	47.7248	68.6275	108.028	154.155	110.128	106.658	4.31796	4.73068	3.86047	5.8134	5.82607	6.22121	6.91753	6.81974	6.2428	6.41424
ENSMUST00000036972	0.00349153	0.0200392	3.05899	down	Yes	chr14	armadillo-like helical domain containing 4 [Source:MGI Symbol;Acc:MGI:1914669]	ENSMUSG00000036242	Armh4		chr14:49675952-49783383:-	NM_026142	8831	CATAAATCTTTAACCTCAATTTATGCTTGCTTTCTTAACTAGTGTGACTTAATTCAATGC	GENCODE	-	Cytoplasm		ASMM10AP1B118442368V4	49783383	49675952	protein_coding	27.8594	104.824	4.83545	6.44851	39.5346	27.5375	11.0912	25.4548	35.6787	102.248	101.718	154.905	95.1383	70.1107	5.40332	4.76248	3.64177	4.96302	5.40667	6.77008	6.83289	6.82672	6.03986	5.773
ENSMUST00000112511	4.0705e-05	0.0019064	3.0561	down	Yes	chr19	lipase, member O4 [Source:MGI Symbol;Acc:MGI:3779637]	ENSMUSG00000079344	Lipo4		chr19:33499159-33517776:-	NM_001323386	1188	TGATTGGATCGATGGGTGGATATTCTCCAGAACAGTTAAATATGAGCCGCCTTGATGTGT	GENCODE	-			ASMM10AP1B113899598V4	33517776	33499159	protein_coding	24.3603	96.7851	4.76496	6.37665	27.0741	25.6776	24.5189	20.5406	23.9903	89.2348	111.599	101.482	80.4741	101.135	4.83461	4.65501	4.86037	4.64395	4.83088	6.57596	6.96658	6.21048	5.79906	6.3312
ENSMUST00000041369	0.000755385	0.00808063	3.05221	down	Yes	chr17	suppressor of cytokine signaling 5 [Source:MGI Symbol;Acc:MGI:2385459]	ENSMUSG00000037104	Socs5		chr17:87107679-87137583:+	NM_019654	4392	TGCTGGCGCCGTGGAGCTCTTCTAATCAATGGATAAAGTGGGGAAAATGTGGAACAACTT	GENCODE	+			ASMM10AP1B100746057V4	87137583	87107679	protein_coding	13.5482	49.923	3.81741	5.42726	12.8189	12.3433	7.51589	17.8593	17.2038	47.2286	47.1078	56.9042	59.5354	38.8389	3.71104	3.55975	3.02471	4.44934	4.3422	5.71775	5.78001	5.35628	5.37348	4.90879
ENSMUST00000041956	0.000310246	0.0051977	3.04944	down	Yes	chr11	sperm associated antigen 9 [Source:MGI Symbol;Acc:MGI:1918084]	ENSMUSG00000020859	Spag9	Yes	chr11:93996103-94126085:+	NM_001363157	7340	GCAAGCACGCCGAGGAGAAATTCATTGAATTTGAAGACTCTCAAGAACAGGAAAAAAAGG	GENCODE	+	Nucleus		ASMM10AP1B120023675V4	94126085	93996103	protein_coding	541.139	2195.92	9.19371	10.8023	570.156	447.917	234.13	685.519	767.972	2094.8	1868.54	2765.19	2440.94	1810.13	9.37212	8.86541	8.37005	9.63708	9.72387	11.0239	10.9105	10.8233	10.6515	10.6021
ENSMUST00000055241	0.000180501	0.00387417	3.04864	down	Yes	chr2	zinc finger protein 106 [Source:MGI Symbol;Acc:MGI:1270153]	ENSMUSG00000027288	Zfp106	Yes	chr2:120506820-120563807:-	NM_011743	9085	TTCTTTTTAAAATAATTATGTGCAGTGTCTCACTATTGATGTAGCTGGACAAAGCTGGCT	GENCODE	-	Nucleus	Yes	ASMM10AP1B114216199V4	120563807	120506820	protein_coding	79.0501	309.277	6.43307	8.04124	97.8218	83.4157	40.2757	83.9708	89.7665	303.03	313.948	318.474	332.864	278.068	6.73958	6.42064	5.6319	6.66497	6.70825	8.30753	8.41165	7.80576	7.83554	7.8457
ENSMUST00000164560	0.00229929	0.0153901	3.04794	down	Yes	chr6	family with sequence similarity 71, member F1 [Source:MGI Symbol;Acc:MGI:3032524]	ENSMUSG00000039742	Fam71f1		chr6:29319157-29335854:+	NM_001289664	1411	CCCTCTCCCAGATCTTTTCCGACTTGCATCAGCAGAAACAGTACAGTTCCAGCAGGAGCG	GENCODE	+			ASMM10AP1B107214382V4	29335854	29319157	protein_coding	1578.95	6906.81	10.6953	12.3031	1018.94	1143.16	797.547	2312.13	2622.98	3213.51	4820.29	10465.8	12131.6	3902.82	10.2382	10.3513	10.2576	11.2379	11.3914	11.6512	12.3371	12.7381	13.0052	11.784
ENSMUST00000033058	6.24851e-05	0.00234249	3.0445	down	Yes	chr7	SET binding factor 2 [Source:MGI Symbol;Acc:MGI:1921831]	ENSMUSG00000038371	Sbf2		chr7:110308022-110614920:-	NM_177324	7154	GTTCATAATCAAGGCGTATGGGCAAGTCTTCGTTCCAGCACCCGTTTGATCAGCTCCCCG	GENCODE	-			ASMM10AP1B117672155V4	110614920	110308022	protein_coding	15.7296	61.1989	4.10647	5.71267	19.8576	14.27	13.095	16.3683	15.0569	56.3917	66.2965	66.9134	68.9652	47.4275	4.37603	3.78504	3.90099	4.32415	4.14615	5.9534	6.23457	5.59066	5.58408	5.20066
ENSMUST00000025989	0.000971818	0.00936869	3.04327	down	Yes	chr19	transmembrane 9 superfamily member 3 [Source:MGI Symbol;Acc:MGI:1914262]	ENSMUSG00000025016	Tm9sf3	Yes	chr19:41210842-41264004:-	NM_133352	6144	AGCACAGCCTTGGGGATAATGTGTGGAGCAATCGGTTACATGGGAACAAGTGCCTTTGTT	GENCODE	-	Nucleus		ASMM10AP1B108513867V4	41264004	41210842	protein_coding	160.371	669.745	7.4973	9.10292	195.234	172.853	98.9124	155.745	179.113	775.674	885.13	586.538	469.334	632.047	7.79425	7.43903	7.02693	7.56164	7.66463	9.62903	9.8619	8.66078	8.31965	9.04323
ENSMUST00000114219	0.000243797	0.00459742	3.04107	down	No	chr16	DNA segment, Chr 16, ERATO Doi 472, expressed [Source:MGI Symbol;Acc:MGI:1196400]	ENSMUSG00000022864	D16Ertd472e		chr16:78544689-78576657:-		1576	CGGGGAGCCGGGGGCACTATGAACGAAGAGGAGCAGTTTGTAAGCATTGACTTGAATGAT	GENCODE	-	Nucleus;Exosome		ASMM10AP1B116511926V4	78576657	78544689	protein_coding	5.96738	22.2233	2.69466	4.29924	5.28067	5.35569	5	5.92579	8.27476	20.9137	23.8509	19.5945	24.3966	22.3607	2.50157	2.48654	2.33871	2.88604	3.26044	4.62255	4.87172	3.81558	4.09829	4.08806
ENSMUST00000002502	0.000161111	0.0037082	3.03824	down	Yes	chr3	helicase-like transcription factor [Source:MGI Symbol;Acc:MGI:1196437]	ENSMUSG00000002428	Hltf		chr3:20057811-20118490:+	NM_009210	4955	CCCGAATCTAAAAATGCCTTTGTGAGTTTAGAATCCGAATTTAACTTTGGAATTTTATTA	GENCODE	+	Nucleus;Cytoplasm	Yes	ASMM10AP1B100127998V4	20118490	20057811	protein_coding	52.4425	205.949	5.86677	7.47001	70.7279	48.45	38.4956	44.0439	60.4953	219.036	220.799	200.661	175.644	213.604	6.2617	5.60362	5.56289	5.75175	6.15389	7.85088	7.93335	7.18055	6.91653	7.46872
ENSMUST00000028639	0.000124648	0.00325644	3.03822	down	Yes	chr2	Meis homeobox 2 [Source:MGI Symbol;Acc:MGI:108564]	ENSMUSG00000027210	Meis2	Yes	chr2:115863064-116065047:-	NM_001159568	2831	GGACTGGGATATTAAATATACGACACATCCAGGAGTTTATTGGAGCGCAGACTGATGGCG	GENCODE	-		Yes	ASMM10AP1B100053687V4	116065047	115863064	protein_coding	5	17.2805	2.34112	3.94434	5	5	5	5	5	18.7371	18.3333	17.4355	14.9069	16.9896	2.33259	2.33065	2.33871	2.35905	2.34458	4.47183	4.5302	3.64331	3.40126	3.6751
ENSMUST00000097897	0.000658691	0.00760062	3.03258	down	Yes	chr4	microtubule-actin crosslinking factor 1 [Source:MGI Symbol;Acc:MGI:108559]	ENSMUSG00000028649	Macf1	Yes	chr4:123349633-123684360:-	NM_001199136	23495	ACAAGACACACTTTTGTATTAAAATTGCTTGCAGTAACAATGTTTTGTAATTCTTGGCTT	GENCODE	-	Nucleus	Yes	ASMM10AP1B111036615V4	123684360	123349633	protein_coding	5117.05	17734.1	12.3296	13.9301	3547.03	3498.95	1872.29	8755.84	7911.13	17081.9	14249.3	22605.2	21595.9	13138.4	12.0923	12.028	11.5718	13.0618	12.8939	14.2392	13.9988	13.9074	13.8706	13.6346
ENSMUST00000097281	0.00155744	0.0124357	3.02993	down	Yes	chr17	HEAT repeat containing 5B [Source:MGI Symbol;Acc:MGI:2444098]	ENSMUSG00000039414	Heatr5b		chr17:78752898-78835324:-	NM_001081179	6388	GGCCGTTCTTAAGGCATGGGCAGAGGTATATGTGGTTGCTATGAATATTAAGAAAGAAGC	GENCODE	-	Exosome		ASMM10AP1B107208193V4	78835324	78752898	protein_coding	29.8602	109.529	4.94297	6.54226	28.3408	24.2593	13.7706	34.5704	48.3598	109.589	86.9778	113.182	141.361	96.5351	4.90031	4.57499	3.98042	5.41444	5.8447	6.86333	6.61187	6.36578	6.61187	6.25843
ENSMUST00000027027	0.000252367	0.00466768	3.02915	down	Yes	chr9	CWF19-like 2, cell cycle control (S. pombe) [Source:MGI Symbol;Acc:MGI:1918023]	ENSMUSG00000025898	Cwf19l2		chr9:3403592-3479236:+	NM_027545	4446	CTTTGGAAAGGAAATCATTGGTGGTATGCTGGATCTAGAACCTAGACTATGGAGGAAGGG	GENCODE	+			ASMM10AP1B114150565V4	3479236	3403592	protein_coding	63.0786	255.173	6.15754	7.75646	82.1318	64.3226	48.5478	56.1756	64.2153	318.56	262.913	216.633	206.348	271.41	6.48119	6.03092	5.93278	6.09765	6.24519	8.37217	8.1658	7.28385	7.15302	7.80745
ENSMUST00000020970	0.000692053	0.00775056	3.02731	down	Yes	chr12	radical S-adenosyl methionine domain containing 2 [Source:MGI Symbol;Acc:MGI:1929628]	ENSMUSG00000020641	Rsad2		chr12:26442746-26456452:-	NM_021384	3782	AGCGTCACAAAGAGGTGTCCTGTTTGGTGCCTGAATCTAACCAGAAGATGAAAGACTCCT	GENCODE	-			ASMM10AP1B105174432V4	26456452	26442746	protein_coding	91.9685	359.949	6.63722	8.23526	76.2559	75.2107	59.2822	158.223	90.8705	282.554	407.555	303.093	444.378	362.166	6.37064	6.26717	6.24376	7.58091	6.72364	8.208	8.76603	7.73942	8.24294	8.21993
ENSMUST00000029975	0.000900384	0.00898771	3.02581	down	Yes	chr4	glycoprotein hormones, alpha subunit [Source:MGI Symbol;Acc:MGI:88390]	ENSMUSG00000028298	Cga		chr4:34893779-34907370:+	NM_009889	687	GATCGACAATCACCTGCCCAGAACACATCCCTCAAAAAGTCCAGAGCTTGCAGAAGAGCT	GENCODE	+			ASMM10AP1B111805001V4	34907370	34893779	protein_coding	19.7478	83.0125	4.40862	6.00594	17.7337	30.9255	19.4286	15.521	15.1305	39.4383	69.0841	122.619	136.166	47.7556	4.19901	4.93202	4.51293	4.24602	4.15311	5.48299	6.29315	6.48253	6.55983	5.21122
ENSMUST00000164769	7.26822e-05	0.00253354	3.01999	down	No	chr17	solute carrier family 29 (nucleoside transporters), member 1 [Source:MGI Symbol;Acc:MGI:1927073]	ENSMUSG00000023942	Slc29a1		chr17:45585671-45592262:-		1226	GGCCGGAGCCTCACTGCTGTCTGCATGTGGGAAAGTCAAACCAGCTGAGGCGGAGACAGC	GENCODE	-			ASMM10AP1B120669671V4	45592262	45585671	protein_coding	6.73484	24.4416	2.83798	4.43252	5	6.6449	6.46054	6.24352	9.32526	19.8245	22.4935	25.8843	25.7183	28.2875	2.33259	2.67132	2.79524	2.95474	3.43599	4.54739	4.79601	4.21119	4.1761	4.4319
ENSMUST00000040504	1.92274e-05	0.00130155	3.01831	down	Yes	chrX	kelch-like 4 [Source:MGI Symbol;Acc:MGI:2442829]	ENSMUSG00000025597	Klhl4		chrX:114474333-114560829:+	NM_172781	3584	TCAACTGTGGGGGCACTTTATGCTGTGGGAGGTATGGATGCTGCTAAAGGCACCACTACA	GENCODE	+		Yes	ASMM10AP1B115764166V4	114560829	114474333	protein_coding	5	17.072	2.34112	3.93486	5	5	5	5	5	15.6699	16.6438	17.8491	15.2457	19.9516	2.33259	2.33065	2.33871	2.35905	2.34458	4.24047	4.40593	3.67873	3.43316	3.91599
ENSMUST00000070597	0.000275172	0.00488948	3.01585	down	Yes	chr6	retinol saturase (all trans retinol 13,14 reductase) [Source:MGI Symbol;Acc:MGI:1914692]	ENSMUSG00000056666	Retsat		chr6:72598475-72608425:+	NM_026159	3027	GGCCTTGAATTTGACACTGGAATTCATTATATTGGACGAATGCGGGAGGGCAACATTGGC	GENCODE	+			ASMM10AP1B104155382V4	72608425	72598475	protein_coding	19.529	74.7238	4.39624	5.98881	22.6538	20.3861	12.2179	17.8892	24.4982	91.0819	63.9974	83.7448	75.7	59.0951	4.57262	4.31017	3.78824	4.45119	4.859	6.6034	6.18524	5.92492	5.71014	5.52035
ENSMUST00000033765	0.000185064	0.00392045	3.013	down	Yes	chrX	arginine vasopressin receptor 2 [Source:MGI Symbol;Acc:MGI:88123]	ENSMUSG00000031390	Avpr2		chrX:73892102-73894428:+	NM_019404	1812	TACCACGTCTGCAGTGCCTGGGGCCCTTTCGTCCCCTAGCTCTCCCAGCAACAGCAGCCA	GENCODE	+			ASMM10AP1B120509423V4	73894428	73892102	protein_coding	1201.72	5600.6	10.4653	12.0565	1161.65	1037.12	877.052	1387.06	1545.73	2711.23	5222.65	8224.81	8402.91	3441.43	10.4459	10.206	10.407	10.5867	10.6808	11.4033	12.4714	12.3819	12.4325	11.5932
ENSMUST00000009120	0.000281722	0.00497559	3.01105	down	Yes	chr16	GA repeat binding protein, alpha [Source:MGI Symbol;Acc:MGI:95610]	ENSMUSG00000008976	Gabpa		chr16:84835124-84863779:+	NM_008065	4987	GGGACGAATTCCGGAGCTGGACTGAACTTTTGAACGTCTTCAACCATGACTAAGAGAGAA	GENCODE	+	Nucleus	Yes	ASMM10AP1B110740888V4	84863779	84835124	protein_coding	18.7068	72.4371	4.35871	5.94897	22.3663	19.4087	14.1377	16.8903	20.7311	83.1436	84.3594	65.9902	67.7764	60.9162	4.55259	4.23359	4.02126	4.36764	4.61846	6.47783	6.57372	5.57234	5.55983	5.56115
ENSMUST00000027432	0.000946911	0.00922093	3.00993	down	Yes	chr1	proteasome (prosome, macropain) 26S subunit, non-ATPase, 1 [Source:MGI Symbol;Acc:MGI:1917497]	ENSMUSG00000026229	Psmd1	Yes	chr1:86064619-86139151:+	NM_027357	3112	GTGGAGACTATTATAGCAAAATGCATTGATCATTATACCAAACAGTGTGTGGAAAATGCA	GENCODE	+	Nucleus		ASMM10AP1B101285062V4	86139151	86064619	protein_coding	130.294	504.026	7.13332	8.72305	161.054	119.089	57.5935	142.688	171.045	536.584	545.459	502.362	485.056	450.668	7.50343	6.92645	6.20118	7.43492	7.60065	9.10202	9.1784	8.44589	8.3622	8.52676
ENSMUST00000109608	0.000138294	0.00345562	3.00974	down	Yes	chr2	copine I [Source:MGI Symbol;Acc:MGI:2386621]	ENSMUSG00000074643	Cpne1	Yes	chr2:156071847-156111943:-	NM_170588	3492	ACATCTCTTGTTTTACAGATGGCTCATTGCGTGACCTTGGTCCAGCTCTCCGTGTCCTGT	GENCODE	-			ASMM10AP1B101825974V4	156111943	156071847	protein_coding	23.2722	95.6299	4.69099	6.28063	21.9713	22.1093	21.8885	21.3883	29.0038	45.9846	97.3206	123.582	133.58	77.682	4.52789	4.43043	4.68961	4.70243	5.10458	5.68176	6.76898	6.4947	6.5289	5.9288
ENSMUST00000086046	0.000141047	0.00348862	3.00765	down	Yes	chr5	nipsnap homolog 2 [Source:MGI Symbol;Acc:MGI:1278343]	ENSMUSG00000029432	Nipsnap2		chr5:129725063-129758327:+	NM_008095	2112	TCTGCCCTACAAATTGATTTGTGTAAAATAAAGTATAACTAAATCTCCTATCAGATGTCT	GENCODE	+	Nucleus		ASMM10AP1B115083841V4	129758327	129725063	protein_coding	9905.54	32754.2	13.2793	14.8679	6791.05	7469.06	4433.98	14864.9	15968.6	28190.3	24792.1	44197.3	43373.7	23217.6	12.9806	13.0385	12.7784	13.7506	13.8485	15.0464	14.8897	14.9338	14.9381	14.5316
ENSMUST00000101395	0.0468888	0.109326	3.00677	down	Yes	chr6	homeobox A4 [Source:MGI Symbol;Acc:MGI:96176]	ENSMUSG00000000942	Hoxa4		chr6:52189671-52191753:-	NM_008265	1594	GAGAGATATGGTTGTATAAAGAGGAATGTGCTAAGAATAAACTTCAGTTTATAAGACATT	GENCODE	-	Cytoplasm	Yes	ASMM10AP1B100085282V4	52191753	52189671	protein_coding	66.0492	184.569	5.62331	7.21152	21.7325	30.5541	17.7245	178.585	81.6496	128.428	110.605	284.906	248.462	150.444	4.51357	4.91244	4.36451	7.7536	6.5724	7.08975	6.95266	7.65855	7.41596	6.94067
ENSMUST00000048646	4.47595e-05	0.00200101	3.0053	down	Yes	chr15	vacuolar protein sorting 13B [Source:MGI Symbol;Acc:MGI:1916380]	ENSMUSG00000037646	Vps13b	Yes	chr15:35371160-35931229:+	NM_177151	13757	TGCAGCTCAAGCAACCAAGAGTAGCCTCTGATGTGGAGATTGATGGTGCCCGGGAGAGGC	GENCODE	+			ASMM10AP1B118445046V4	35931229	35371160	protein_coding	14.0942	53.4303	3.94495	5.53246	16.0421	14.3031	13.4351	10.6483	16.0421	54.5726	55.133	53.576	49.9517	53.9181	4.04744	3.7881	3.94337	3.70472	4.24109	5.91004	5.98429	5.26146	5.11836	5.38813
ENSMUST00000110942	0.00600488	0.0280216	3.003	down	Yes	chr12	membrane bound O-acyltransferase domain containing 2 [Source:MGI Symbol;Acc:MGI:1914466]	ENSMUSG00000020646	Mboat2		chr12:24831623-24959874:+	NM_026037	2351	TGCTGATTTTTCAGGCCCAATGATGATCATTACGCAGAAGATCACTAGTTTGGCTTACGA	GENCODE	+			ASMM10AP1B109192673V4	24959874	24831623	protein_coding	8.93068	28.2117	3.04594	4.63235	13.8492	6.32397	5	5	14.4802	32.892	25.9649	26.0964	26.7686	29.3365	3.8212	2.62346	2.33871	2.35905	4.08728	5.23769	4.97815	4.22372	4.23465	4.48752
ENSMUST00000020969	3.74863e-05	0.00185435	2.99866	down	Yes	chr12	cytidine monophosphate (UMP-CMP) kinase 2, mitochondrial [Source:MGI Symbol;Acc:MGI:99830]	ENSMUSG00000020638	Cmpk2		chr12:26469204-26479837:+	NM_020557	3200	ACGCGGCAAGGGCTGTCTTGGAAGAGTGCACATCCTTTATTCCAGAAGCCCGGGCAGTAC	GENCODE	+			ASMM10AP1B118852831V4	26479837	26469204	protein_coding	5	17.6781	2.34112	3.92543	5	5	5	5	5	9.45525	18.1564	15.2233	23.454	22.1015	2.33259	2.33065	2.33871	2.35905	2.34458	3.55253	4.51631	3.44703	4.04157	4.06972
ENSMUST00000047232	0.00240695	0.0158379	2.99865	down	Yes	chr2	alkylglycerone phosphate synthase [Source:MGI Symbol;Acc:MGI:2443065]	ENSMUSG00000042410	Agps	Yes	chr2:75832177-75931350:+	NM_172666	7359	TGGGACTGTATTTCAGCTACATTTGTTTGTTGGTTTAAAATGAGTTGGTTTTTGTTCTGT	GENCODE	+			ASMM10AP1B116945406V4	75931350	75832177	protein_coding	43.4334	157.957	5.5043	7.08862	47.6247	38.0811	18.6545	51.7642	61.0424	176.31	166.939	161.289	136.024	149.225	5.68219	5.24269	4.44742	5.97824	6.17099	7.53971	7.53495	6.88159	6.55819	6.92864
ENSMUST00000135846	0.000121311	0.00323496	2.99818	down	Yes	chr10	ectonucleotide pyrophosphatase/phosphodiesterase 1 [Source:MGI Symbol;Acc:MGI:97370]	ENSMUSG00000037370	Enpp1		chr10:24641806-24711991:-	NM_001308327	2721	GTGCCAATCAAGGACTTTGAGAAACAGCTTAATCTGACCACAGAAGATGTAGATGACATT	GENCODE	-	Nucleus		ASMM10AP1B107983841V4	24711991	24641806	protein_coding	7.27711	26.3144	2.95189	4.53597	9.58882	7.36962	6.21417	5.96372	7.24923	27.1544	27.8659	25.8757	23.3946	27.2812	3.26746	2.79872	2.74347	2.89433	3.05546	4.97915	5.07455	4.2107	4.03753	4.37793
ENSMUST00000045664	0.000941431	0.00918772	2.99637	down	Yes	chr12	ATPase family, AAA domain containing 2B [Source:MGI Symbol;Acc:MGI:2444798]	ENSMUSG00000052812	Atad2b	Yes	chr12:4917404-5047394:+	NM_001099628	8035	GGCCTTTGGACCAACCTCTTATAGGCCTCGATTGTTGCTATCTGGAGAACGAGGTTCAGG	GENCODE	+			ASMM10AP1B107342524V4	5047394	4917404	protein_coding	14.0441	49.8222	3.84731	5.43052	13.6218	15.9129	6.34102	16.2356	18.1094	47.9088	40.5904	59.0694	55.9009	45.6412	3.79475	3.94053	2.77017	4.31268	4.41841	5.73707	5.57786	5.41021	5.28625	5.14123
ENSMUST00000099385	3.21671e-05	0.00175354	2.99528	down	Yes	chr2	predicted gene 10762 [Source:MGI Symbol;Acc:MGI:3704209]	ENSMUSG00000074807	Gm10762		chr2:128966593-128967725:-		1133	TTTCCATATCCTTCAGAAATAGTCTTGAAATGATGAGTAATGTATACTTAGTTCTGAAGG	GENCODE	-			ASMM10AP1B100177609V4	128967725	128966593	protein_coding	76.2525	299.69	6.39651	7.9792	80.2091	75.7836	43.9789	83.1382	98.1526	247.609	248.926	386.038	330.87	285.009	6.44744	6.27846	5.77153	6.65203	6.83308	8.02741	8.09719	8.06396	7.82763	7.87981
ENSMUST00000037198	0.000318126	0.00526331	2.99273	down	Yes	chr4	oxidative stress induced growth inhibitor family member 2 [Source:MGI Symbol;Acc:MGI:2384798]	ENSMUSG00000041153	Osgin2		chr4:15997121-16013888:-	NM_145950	2658	CCTGGTGGGGCATGGCATAATATGGAAGGTTCTATGTTGACAATCAGCTTTGGAAATTGG	GENCODE	-			ASMM10AP1B100823993V4	16013888	15997121	protein_coding	6.70956	23.6281	2.80152	4.38298	7.43416	7.18565	6.68238	7.2456	5	27.74	23.039	22.3951	20.6348	24.3317	2.88984	2.76696	2.84501	3.16123	2.34458	5.00883	4.82731	4.00845	3.85878	4.21154
ENSMUST00000165315	0.000148021	0.0035508	2.99221	down	Yes	chr9	sorting nexin 14 [Source:MGI Symbol;Acc:MGI:2155664]	ENSMUSG00000032422	Snx14		chr9:88376750-88438951:-	NM_172926	3109	AGGTGCAGAATCGCCCACACGCAATTCCAAATTCAACAGAAGCACACAAAAAAGAGGAGA	GENCODE	-	Nucleus		ASMM10AP1B121362660V4	88438951	88376750	protein_coding	19.2094	72.4363	4.38328	5.96449	23.577	16.8498	17.3587	13.5515	24.7098	73.0322	76.5533	71.1808	72.0638	69.3514	4.63372	4.02785	4.32814	4.05498	4.87172	6.30318	6.43771	5.68488	5.6392	5.75749
ENSMUST00000178812	0.00254153	0.0163566	2.99176	down	No	chr9	catenin (cadherin associated protein), beta 1 [Source:MGI Symbol;Acc:MGI:88276]	ENSMUSG00000006932	Ctnnb1	Yes	chr9:120933572-120959780:+	NM_001165902	2702	CGGGCGGCCGCGAGGTACCTGAAGCTCAGCGCACAGCTGCTGTGACACCGCTGCGTGGAC	GENCODE	+	Nucleus	Yes	ASMM10AP1B124621583V4	120959780	120933572	protein_coding	8.3089	29.253	3.09044	4.67144	11.8013	6.02621	5	9.5043	9.21268	29.3766	36.1204	25.2332	24.8006	30.7341	3.58233	2.57546	2.33871	3.53853	3.41718	5.08141	5.42319	4.17161	4.12234	4.55864
ENSMUST00000115577	0.000150285	0.0035706	2.98931	down	Yes	chr6	sarcoglycan, epsilon [Source:MGI Symbol;Acc:MGI:1329042]	ENSMUSG00000004631	Sgce		chr6:4674350-4747176:-	NM_001130188	1776	GGCTGCTGGGAAGAAAGATGTGTACACTCTTTTCTCCAAGGTGCACTCTGACCGGAACGT	GENCODE	-			ASMM10AP1B100291592V4	4747176	4674350	protein_coding	8.63661	31.5175	3.20379	4.7836	10.1485	6.4943	7.23672	8.81988	10.4837	28.6934	28.5644	25.9112	39.4265	34.9917	3.35544	2.65045	2.96673	3.43941	3.6069	5.05097	5.1088	4.21334	4.79198	4.75292
ENSMUST00000117989	0.00558818	0.0268258	2.98686	down	Yes	chr7	neugrin, neurite outgrowth associated [Source:MGI Symbol;Acc:MGI:1933212]	ENSMUSG00000047084	Ngrn		chr7:80261215-80265374:+	NM_031375	1317	CCAGGAGGTGGAGAGCGCTTTGAAACGTCAGAAAAAAGCAATGCGATTCCAGAAAATACG	GENCODE	+			ASMM10AP1B123095346V4	80265374	80261215	protein_coding	20.99	74.2652	4.40476	5.98339	25.6198	18.1912	8.36307	22.0123	30.7635	90.8021	81.5756	64.4272	67.0365	67.4844	4.75352	4.13781	3.19149	4.74925	5.19171	6.59881	6.52109	5.53464	5.54289	5.7195
ENSMUST00000118592	0.000300529	0.00508587	2.98285	down	Yes	chr19	coiled-coil domain containing 186 [Source:MGI Symbol;Acc:MGI:2445022]	ENSMUSG00000035173	Ccdc186		chr19:56787481-56822190:-		6445	GGCCCGGGGCTGGACGACGGACGATGTAAATGAAGATCAGGAGCAGATTTGAAGAAATGC	GENCODE	-			ASMM10AP1B118419446V4	56822190	56787481	protein_coding	15.0886	57.1396	4.03778	5.61447	14.3401	14.4429	13.5595	12.5528	20.5479	73.0229	53.1736	54.9619	52.1221	52.4176	3.87487	3.80296	3.95981	3.94637	4.60489	6.30279	5.93717	5.30135	5.18197	5.34909
ENSMUST00000020334	8.87685e-06	0.000852994	2.97968	down	No	chr10	ubiquitin specific peptidase 15 [Source:MGI Symbol;Acc:MGI:101857]	ENSMUSG00000020124	Usp15	Yes	chr10:123111736-123196953:-	NM_001301628	4666	GTTTACATTTGAAATGTGCATGTTTATTTATACAGATTTCAATAAAGCTATTGACGGCCT	GENCODE	-	Nucleus		ASMM10AP1B100051861V4	123196953	123111736	protein_coding	469.799	1978.2	9.06678	10.6419	473.57	452.252	287.882	513.857	621.432	1679.96	1826.98	2519.61	2337.01	1527.44	9.10562	8.88183	8.67541	9.2389	9.43214	10.7149	10.8694	10.6863	10.5956	10.3435
ENSMUST00000015358	0.00030286	0.00510281	2.97449	down	Yes	chrX	myotubularin related protein 1 [Source:MGI Symbol;Acc:MGI:1858271]	ENSMUSG00000015214	Mtmr1		chrX:71364760-71419196:+	NM_001313707	4634	TTCAGGTTCAGTGACATCAGAAAATGTGTCAAGAGATTACAAGGCTCTAAGGGATGGAAA	GENCODE	+			ASMM10AP1B108350783V4	71419196	71364760	protein_coding	21.4944	80.4538	4.53202	6.10466	19.2559	23.4594	12.8763	25.2536	26.627	83.5333	73.6057	99.4129	78.484	67.233	4.32663	4.52162	3.87688	4.95328	4.9817	6.4867	6.38055	6.17816	5.76343	5.71447
ENSMUST00000098576	0.00212914	0.0147749	2.97412	down	Yes	chr9	zinc finger protein 280D [Source:MGI Symbol;Acc:MGI:2384583]	ENSMUSG00000038535	Zfp280d	Yes	chr9:72274879-72363777:+	NM_146224	4387	GCCTGTTAAAATTCTGTTGTATATAGTAGTTTTTGAGCAGATATTTGCAATAAAAACCTG	GENCODE	+	Exosome	Yes	ASMM10AP1B100090677V4	72363777	72274879	protein_coding	155.908	598.809	7.34118	8.91364	126.871	126.961	65.0692	228.841	231.799	552.796	429.669	787.44	797.959	426.183	7.13134	7.0117	6.3909	8.13624	8.03573	9.1434	8.83537	9.07564	9.06419	8.44961
ENSMUST00000135269	8.91142e-05	0.00277983	2.97363	down	No	chr8	CCR4-NOT transcription complex, subunit 7 [Source:MGI Symbol;Acc:MGI:1298230]	ENSMUSG00000031601	Cnot7		chr8:40492547-40511718:-	NM_001271543	2461	ACCTCATGAAGAGCTGCAAAAATCTCAAAATGTTCTTTGAAGATCACATTGATGATGCCA	GENCODE	-	Nucleus	Yes	ASMM10AP1B103870354V4	40511718	40492547	protein_coding	60.9799	234.75	6.08423	7.65646	68.5969	52.3823	41.3506	64.1384	78.4314	224.078	219.502	232.513	221.306	276.349	6.22068	5.72317	5.6749	6.28422	6.51818	7.88733	7.92723	7.37829	7.25321	7.83624
ENSMUST00000001716	0.00151953	0.0122912	2.9732	down	Yes	chr10	D-dopachrome tautomerase [Source:MGI Symbol;Acc:MGI:1298381]	ENSMUSG00000001666	Ddt		chr10:75771233-75773414:-	NM_010027	649	CCCGCTAACATGCCATTCGTTGAGTTGGAAACAAACTTGCCGGCTAGCCGCATACCCGCG	GENCODE	-	Cytoplasm		ASMM10AP1B100111067V4	75773414	75771233	protein_coding	28.2372	102.545	4.8815	6.45352	30.4484	25.8093	12.5747	33.2738	39.0797	99.4235	98.6782	120.244	111.623	82.7591	5.01262	4.66446	3.83465	5.35772	5.53806	6.73217	6.79033	6.45355	6.26483	6.02671
ENSMUST00000062041	0.00573501	0.0272336	2.97218	down	Yes	chr12	isoprenoid synthase domain containing [Source:MGI Symbol;Acc:MGI:1923097]	ENSMUSG00000043153	Ispd		chr12:36381519-36689444:+	NM_178629	2690	TACTAATTTCATGTAAAGAATCTGTTCACTACTGCAGCAAGTGAAATTGAAACGCTCAGG	GENCODE	+			ASMM10AP1B115338903V4	36689444	36381519	protein_coding	16.0984	55.2878	3.99811	5.56963	23.0442	8.25406	9.05681	15.6288	24.5084	62.6751	49.3188	53.2109	44.6127	66.6215	4.59725	2.95963	3.31666	4.25756	4.85944	6.09221	5.83761	5.25155	4.96637	5.7004
ENSMUST00000113146	0.000184757	0.00392023	2.9721	down	Yes	chr6	myotubularin related protein 14 [Source:MGI Symbol;Acc:MGI:1916075]	ENSMUSG00000030269	Mtmr14		chr6:113237843-113281392:+	NM_026849	2676	CCCAAACCCAGATCAGTGGACCATCCCCTGCCCGGATCCTCTCTCTCCACAGACTTTGGC	GENCODE	+			ASMM10AP1B118318536V4	113281392	113237843	protein_coding	608.862	2804.45	9.47449	11.046	517.454	858.727	477.471	549.524	641.134	1517.22	2346.34	3980.48	4484.94	1693.28	9.22321	9.90129	9.45159	9.32378	9.47259	10.5788	11.2578	11.3553	11.5358	10.5023
ENSMUST00000090300	4.98611e-05	0.00207241	2.96895	down	Yes	chr16	meiosis regulator and mRNA stability 1 [Source:MGI Symbol;Acc:MGI:2444505]	ENSMUSG00000060657	Marf1		chr16:14109173-14159267:-	NM_001081154	7751	ACCCTCAAGAGCCTTTGGGAGTTTTAGTTTTAAACCAAGAAGAAAAATCAGAAGTTCCAC	GENCODE	-			ASMM10AP1B111421998V4	14159267	14109173	protein_coding	26.3723	98.4664	4.82483	6.39478	27.2043	36.0573	15.7478	21.9499	30.9022	86.7546	81.9794	123.189	105.356	95.053	4.84225	5.16391	4.17659	4.74386	5.19752	6.53816	6.52874	6.49052	6.18592	6.23057
ENSMUST00000031474	0.00190568	0.0139765	2.96684	down	No	chr5	ankyrin repeat and LEM domain containing 2 [Source:MGI Symbol;Acc:MGI:1261856]	ENSMUSG00000029501	Ankle2		chr5:110231041-110256647:+	NM_027922	5215	TGTTTCTGTTTTGACTCAAGAGTTGAATAAACTGAATTTGCAAAGCCTGGGAGACAGCCT	GENCODE	+			ASMM10AP1B100609544V4	110256647	110231041	protein_coding	17.4691	62.6857	4.17681	5.74574	17.1249	13.277	9.44124	24.8	22.7024	74.9452	49.5984	72.8598	55.2866	60.7385	4.1483	3.67693	3.38343	4.92512	4.75027	6.33648	5.84596	5.71968	5.26925	5.55731
ENSMUST00000107909	0.000317216	0.00525654	2.9646	down	No	chr11	musashi RNA-binding protein 2 [Source:MGI Symbol;Acc:MGI:1923876]	ENSMUSG00000069769	Msi2	Yes	chr11:88339382-88718229:-	NM_001363195	6436	GTCTTCCTTTCCTATGAGTGCTTTTTCTTTTCTTCTGTTCAAAGAGGTCATATTACAAGG	GENCODE	-			ASMM10AP1B111467301V4	88718229	88339382	protein_coding	242.524	962.658	8.07033	9.63817	274.277	218.955	122.651	273.599	323.137	926.417	1022.49	1095.31	1019.63	749.44	8.30438	7.77256	7.3626	8.38213	8.52997	9.87907	10.0573	9.53145	9.41964	9.30335
ENSMUST00000019443	4.89328e-05	0.00205858	2.96439	down	Yes	chr14	ring finger protein 31 [Source:MGI Symbol;Acc:MGI:1934704]	ENSMUSG00000047098	Rnf31		chr14:55591708-55603693:+	NM_194346	3485	TCTAAAGTGGCCCACAGTCCCGCCCTCTCTGCCAGGACTTCCTGTTCCCGGTAACCCTGG	GENCODE	+	Cytoplasm		ASMM10AP1B122678565V4	55603693	55591708	protein_coding	488.488	2248.52	9.1893	10.757	493.928	538.601	516.798	433.936	459.179	1264.93	1891.2	3025.62	3492.83	1568.02	9.15781	9.17751	9.57641	9.01437	9.02038	10.3252	10.9354	10.9668	11.1785	10.3793
ENSMUST00000041638	0.000107568	0.00304322	2.96373	down	Yes	chr1	general transcription factor IIIC, polypeptide 3 [Source:MGI Symbol;Acc:MGI:2138383]	ENSMUSG00000041303	Gtf3c3		chr1:54396004-54438971:-	NM_001033194	4582	CGCAGTGGTTTGGCTTCGGCATGCAGAATGTTTAAAGGCCTTGGGCTACATGGAACGTGC	GENCODE	-		Yes	ASMM10AP1B117701557V4	54438971	54396004	protein_coding	9.99679	36.4742	3.42754	4.99495	12.7146	10.3053	9.05943	8.93009	8.97451	36.2243	40.6134	38.5844	30.4681	36.4807	3.69948	3.2888	3.31704	3.45528	3.37708	5.36585	5.57881	4.79755	4.42044	4.8121
ENSMUST00000096575	0.00306748	0.0183964	2.95057	down	Yes	chr18	mitogen-activated protein kinase kinase kinase 2 [Source:MGI Symbol;Acc:MGI:1346873]	ENSMUSG00000024383	Map3k2	Yes	chr18:32163089-32236751:+	NM_011946	10791	CCTGAGGTCATCAGTGGAGAAGGCTATGGAAGAAAAGCAGACATCTGGAGTGTAGCATGT	GENCODE	+			ASMM10AP1B111708417V4	32236751	32163089	protein_coding	6.78898	22.794	2.7437	4.30469	11.6778	5.46073	5	5	6.80635	28.0977	24.3459	15.41	24.7781	21.3381	3.56734	2.49956	2.33871	2.35905	2.95381	5.02461	4.89725	3.46543	4.12053	4.01562
ENSMUST00000032191	0.000289253	0.00500833	2.95039	down	Yes	chr6	sulfatase modifying factor 1 [Source:MGI Symbol;Acc:MGI:1889844]	ENSMUSG00000030101	Sumf1		chr6:108107028-108185582:-	NM_145937	2593	TGCGGATTTTGAGAAGTTTGTGAACTCGACTGGCTATTTGACAGAGGCTGAGAAGTTTGG	GENCODE	-	Nucleus		ASMM10AP1B107043433V4	108185582	108107028	protein_coding	6.41008	23.3958	2.79713	4.35804	6.96874	5	5.19638	7.15524	7.73003	26.1454	20.083	23.9431	28.2554	18.5523	2.79935	2.33065	2.55302	3.14407	3.15858	4.92697	4.64495	4.10056	4.31358	3.80416
ENSMUST00000120859	0.00121755	0.0107277	2.94997	down	No	chr15	casein kinase 1, epsilon [Source:MGI Symbol;Acc:MGI:1351660]	ENSMUSG00000022433	Csnk1e		chr15:79419166-79442002:-		1391	CCCCGGCGGCCGCCCCGGCGCGCAAGGTTGAAGCATGGAGTTGCGTGTGGGAAATAAGTA	GENCODE	-			ASMM10AP1B128855277V4	79442002	79419166	protein_coding	6.19743	21.8698	2.69554	4.25624	9.76828	5	5	5.58153	5.63733	20.1741	27.9129	18.4423	17.935	24.8848	3.29628	2.33065	2.33871	2.8099	2.70216	4.57125	5.07707	3.72761	3.6605	4.24478
ENSMUST00000183404	0.00018305	0.003908	2.94993	down	Yes	chr9	transcription factor 12 [Source:MGI Symbol;Acc:MGI:101877]	ENSMUSG00000032228	Tcf12	Yes	chr9:71842688-72111847:-	NM_011544	6299	GTGCCATCCTTTTTTTTAACATAGTAAACTAGTGAGTTTTTTACACTCCTGTTTTCCACA	GENCODE	-	Nucleus;Exosome	Yes	ASMM10AP1B123462625V4	72111847	71842688	protein_coding	229.479	917.656	7.98156	9.54224	210.208	201.361	119.916	316.225	299.683	749.157	680.396	1158.12	1205.31	795.301	7.91014	7.65855	7.32857	8.59047	8.42009	9.58321	9.48849	9.6029	9.65169	9.38493
ENSMUST00000026703	0.000631459	0.00740912	2.94336	down	Yes	chr16	BTB and CNC homology 1, basic leucine zipper transcription factor 1 [Source:MGI Symbol;Acc:MGI:894680]	ENSMUSG00000025612	Bach1		chr16:87698945-87733346:+	NM_007520	5867	ACCTTGAGTCGGAAATCGAGAAGCTGCAAAGTGAAAAGGAGAGCTTGCTGAAGGAGCGAG	GENCODE	+	Exosome	Yes	ASMM10AP1B114150225V4	87733346	87698945	protein_coding	8.52916	28.4853	3.09434	4.65181	7.8419	14.7898	5	7.00724	8.00684	27.8968	26.2375	29.3058	26.5388	32.4476	2.97046	3.83677	2.33871	3.11384	3.21193	5.01581	4.99188	4.39135	4.22277	4.63721
ENSMUST00000112464	0.000488223	0.00652526	2.94265	down	Yes	chrX	Bclaf1 and Thrap3 family member 3 [Source:MGI Symbol;Acc:MGI:2685992]	ENSMUSG00000044150	Bclaf3		chrX:159532668-159593081:+	NM_001358939	3366	TTATTCAGAAACCTTACATAAACTATACTATGCAGAGAAAAGATGCCATTGATCAGAAGA	GENCODE	+			ASMM10AP1B107279040V4	159593081	159532668	protein_coding	46.4082	173.562	5.65904	7.21616	53.6532	46.5953	24.704	55.0827	52.006	210.136	156.206	179.41	172.759	149.298	5.85675	5.5465	4.87443	6.06551	5.95202	7.79125	7.44449	7.02335	6.89215	6.92955
ENSMUST00000021209	0.00897234	0.036219	2.94066	down	Yes	chr11	double C2, beta [Source:MGI Symbol;Acc:MGI:1100497]	ENSMUSG00000020848	Doc2b		chr11:75768966-75796049:-	NM_007873	4361	AAAGTAAATGAGAACGTCGTACTGAGGTCGCACTAGCTTGGGAAACTCCTTGGAAGATCT	GENCODE	-			ASMM10AP1B100044014V4	75796049	75768966	protein_coding	19.4736	68.4123	4.25286	5.809	14.1055	14.3553	8.64998	28.862	31.3954	50.5661	62.9464	89.3652	99.1583	40.0256	3.85025	3.79438	3.24629	5.1531	5.22027	5.80835	6.16188	6.01982	6.10215	4.9528
ENSMUST00000074262	0.00628007	0.0287994	2.93851	down	Yes	chr2	calcitonin receptor-like [Source:MGI Symbol;Acc:MGI:1926944]	ENSMUSG00000059588	Calcrl		chr2:84330626-84425411:-	NM_018782	4882	ATCTTGTGCTACCAACTGTCAAAACTTTGGATGGTCTAACACTCAGGTCATGACCCTTGT	GENCODE	-			ASMM10AP1B118640570V4	84425411	84330626	protein_coding	15.035	50.7079	3.8838	5.43888	14.0753	11.3789	5.9433	22.4358	21.3415	46.7859	46.8635	56.9839	65.6655	37.2409	3.84681	3.43787	2.69083	4.78172	4.66175	5.70608	5.77244	5.35798	5.51465	4.84326
ENSMUST00000148721	1.90157e-05	0.00130155	2.9362	down	Yes	chr17	RIKEN cDNA 2310061I04 gene [Source:MGI Symbol;Acc:MGI:1916912]	ENSMUSG00000050705	2310061I04Rik		chr17:35892677-35897431:-	NM_001033630	1293	CAGGCGCGACCCCAGGACCAGCTCTCTCCTCGACCTCTACCATTCCCCCCGCTCTGGCCC	GENCODE	-			ASMM10AP1B122682045V4	35897431	35892677	protein_coding	639.425	2864.38	9.57341	11.1274	663.014	683.837	537.354	609.205	703.713	1474.12	2700.77	3958.75	3959.63	2228.66	9.60418	9.55542	9.63781	9.47296	9.59667	10.543	11.453	11.346	11.3575	10.9374
ENSMUST00000021857	2.27836e-05	0.00143751	2.93511	down	Yes	chr13	phenylalanine-tRNA synthetase 2 (mitochondrial) [Source:MGI Symbol;Acc:MGI:1917205]	ENSMUSG00000021420	Fars2		chr13:36117412-36537593:+	NM_024274	2125	CTTTGGGCGAGCGGCTCAAGGGACCTAGGGCCCTGGCCTCTTCCCGTCAAGATGGCGGCG	GENCODE	+	Cytoplasm		ASMM10AP1B125095303V4	36537593	36117412	protein_coding	40.7566	166.14	5.53087	7.08429	33.8726	45.4034	47.4132	39.7529	37.341	101.088	131.632	231.14	232.264	134.575	5.17153	5.50397	5.89246	5.61357	5.47284	6.75422	7.20431	7.36971	7.32218	6.77102
ENSMUST00000167866	0.00107109	0.00985044	2.93308	down	Yes	chr9	isocitrate dehydrogenase 3 (NAD+) alpha [Source:MGI Symbol;Acc:MGI:1915084]	ENSMUSG00000032279	Idh3a		chr9:54586511-54604661:+	NM_029573	2403	GGTGCATTCCACAACACAAAACAGGTGACAAGAGGTTTTGCTGGTGGTGTTCAGACAGTA	GENCODE	+			ASMM10AP1B109501609V4	54604661	54586511	protein_coding	376.596	1557.88	8.75179	10.3042	478.239	381.397	234.48	333.242	455.623	1990.42	1895.87	1258.41	1217.9	1426.82	9.11738	8.60069	8.37272	8.65851	9.00967	10.9471	10.9392	9.72234	9.66811	10.2443
ENSMUST00000114225	4.85115e-05	0.00205858	2.93227	down	No	chr6	guanine nucleotide binding protein (G protein), gamma 12 [Source:MGI Symbol;Acc:MGI:1336171]	ENSMUSG00000036402	Gng12	Yes	chr6:66896440-67019086:+	NM_001177556	1876	ACCTAAGGCTAAAACTGAAAGCCCTTTGATGGGGTCTTAACTCATATCAGTCATTTGGGC	GENCODE	+			ASMM10AP1B107191868V4	67019086	66896440	protein_coding	5	16.7986	2.34112	3.89314	5	5	5	5	5	14.2813	17.513	14.2963	22.0361	15.8663	2.33259	2.33065	2.33871	2.35905	2.34458	4.11015	4.47241	3.36049	3.95296	3.56967
ENSMUST00000215773	4.79734e-07	0.000206699	2.93035	down	Yes	chr7	olfactory receptor 571 [Source:MGI Symbol;Acc:MGI:3030405]	ENSMUSG00000043310	Olfr571		chr7:102905090-102917536:-		5153	TGTTATTTTTCACCTTCAGTTGTCTCTGATGTAGCTTAACTGTTCTGTTAACTGAACATC	GENCODE	-			ASMM10AP1B112922024V4	102917536	102905090	protein_coding	2169.4	8670.1	11.3003	12.8514	2289.56	2063.45	1290.49	2538.81	2664.7	7082.04	8038.22	10555.7	10551.4	7123.09	11.4501	11.2263	11.0368	11.3717	11.4166	12.8535	13.1362	12.7571	12.7846	12.7254
ENSMUST00000006221	0.00447605	0.0233582	2.9267	down	Yes	chr11	VPS54 GARP complex subunit [Source:MGI Symbol;Acc:MGI:2178798]	ENSMUSG00000020128	Vps54	Yes	chr11:21239281-21321136:+	NM_139061	4323	GTATGTCATTGGTTCTTAAACTGTCAAAAATAAAGATGTACAAAAACAGACTTAAAAGGC	GENCODE	+			ASMM10AP1B106797633V4	21321136	21239281	protein_coding	733.508	2567.56	9.48602	11.0353	507.002	486.263	249.129	1304.94	1120.2	2449.88	2214.14	2850.48	3259.81	2063.5	9.19412	9.01015	8.46364	10.509	10.2531	11.2501	11.1723	10.8685	11.0786	10.8069
ENSMUST00000114184	0.000774074	0.00819596	2.92503	down	No	chr16	GA repeat binding protein, alpha [Source:MGI Symbol;Acc:MGI:95610]	ENSMUSG00000008976	Gabpa		chr16:84834925-84861315:+		2202	AGGAGGAAGTGGAGGGACTGAACTTTTGAACGTCTTCAACCATGACTAAGAGAGAAGCAG	GENCODE	+	Nucleus	Yes	ASMM10AP1B118795320V4	84861315	84834925	protein_coding	16.8825	61.2407	4.17088	5.71934	21.9522	14.6995	10.2314	18.4971	19.0321	66.228	68.1392	60.9377	58.3551	52.5436	4.52675	3.82861	3.51332	4.4926	4.49315	6.17276	6.27263	5.45155	5.34725	5.35249
ENSMUST00000017488	2.70122e-05	0.00158471	2.92473	down	Yes	chr11	vitronectin [Source:MGI Symbol;Acc:MGI:98940]	ENSMUSG00000017344	Vtn		chr11:78499120-78502324:+	NM_011707	1744	TGCCCACCGTTACAGTGGCCGGGAAAGGGTCTACTTCTTCAAGGGGAAGCAGTACTGGGA	GENCODE	+		Yes	ASMM10AP1B101121380V4	78502324	78499120	protein_coding	17.7183	65.395	4.26965	5.81795	18.5963	19.1814	16.6102	21.4576	12.7462	59.671	64.3537	64.1238	73.8771	64.9495	4.27456	4.21714	4.26052	4.70674	3.88928	6.03439	6.19348	5.52855	5.67454	5.65881
ENSMUST00000060226	6.65916e-05	0.00243064	2.92271	down	Yes	chr5	transmembrane p24 trafficking protein 2 [Source:MGI Symbol;Acc:MGI:1929269]	ENSMUSG00000029390	Tmed2		chr5:124540695-124550506:+	NM_019770	2074	TGACATTTGATTGGCCTATAATTCTTACTTGAAAGGAGCCCCATTATATAGGCCCTTCCA	GENCODE	+	Exosome		ASMM10AP1B103823856V4	124550506	124540695	protein_coding	703.817	2846.76	9.65732	11.2046	788.08	614.733	432.125	783.688	900.46	2836.93	2970.85	2853.8	2739.85	2832.36	9.85651	9.37951	9.29325	9.80971	9.94761	11.4614	11.5778	10.8705	10.8074	11.3061
ENSMUST00000226330	0.00111094	0.0100609	2.92208	down	Yes	chr13	vomeronasal 1 receptor 201 [Source:MGI Symbol;Acc:MGI:2159690]	ENSMUSG00000094898	Vmn1r201		chr13:22471923-22478701:+		4770	GGGTCTGACTGTTCTCTGAGGGCACTTCTGAGTTGCACAGGTTCCACAGGACTTAGGAAG	GENCODE	+			ASMM10AP1B101855129V4	22478701	22471923	protein_coding	7.97015	30.0057	3.00911	4.55611	7.05847	11.759	9.82824	6.20504	5	11.2418	15.146	44.5504	43.2963	35.7938	2.81612	3.49154	3.44703	2.9463	2.34458	3.79255	4.28253	4.99771	4.92568	4.78207
ENSMUST00000113093	0.0159736	0.0523272	2.91617	down	Yes	chr5	chemokine (C-X-C motif) ligand 9 [Source:MGI Symbol;Acc:MGI:1352449]	ENSMUSG00000029417	Cxcl9		chr5:92321347-92328079:-	NM_008599	2889	TCCGGACTCGGCAAATGTGAAGAAGCTGATGAAAGAATGGGAAAAGAAGATCAGCCAAAA	GENCODE	-			ASMM10AP1B106213423V4	92328079	92321347	protein_coding	113.059	367.584	6.68533	8.22941	55.5291	50.513	54.7207	243.297	161.234	255.45	284.253	432.564	542.222	323.429	5.90505	5.66641	6.1232	8.22151	7.51051	8.0692	8.27082	8.2287	8.52244	8.05588
ENSMUST00000102825	0.0147422	0.0496554	2.91441	down	Yes	chr19	interferon-induced protein with tetratricopeptide repeats 3 [Source:MGI Symbol;Acc:MGI:1101055]	ENSMUSG00000074896	Ifit3		chr19:34583531-34588731:+	NM_010501	1745	CCTCATTACTAATCATGTAGGGAATGGAGCTTAAAGCAGACAGAGCACCTTTTGATCACA	GENCODE	+			ASMM10AP1B100008049V4	34588731	34583531	protein_coding	1255.06	4765.12	10.2574	11.8006	1078.7	573.017	512.946	2213.37	1897.27	2439.6	6525.8	3727.52	8308.72	2823.95	10.3266	9.27386	9.56322	11.1843	10.9392	11.2449	12.7827	11.2596	12.4133	11.3026
ENSMUST00000115319	0.00118489	0.0105062	2.91411	down	Yes	chrX	kelch-like 13 [Source:MGI Symbol;Acc:MGI:1914705]	ENSMUSG00000036782	Klhl13		chrX:23219285-23285559:-	NM_001290476	3349	ATTCTGAGTAGATCACTTGTGGAAGAGGAAGACCAGCACTTGAAACTGTGCCTTGGAAGT	GENCODE	-		Yes	ASMM10AP1B104769423V4	23285559	23219285	protein_coding	8.54224	29.634	3.15882	4.70187	12.5294	5.48007	5.56953	8.05476	11.0775	29.6252	28.3993	25.3973	29.4384	35.3096	3.67406	2.50194	2.62379	3.30953	3.68476	5.09291	5.09994	4.18108	4.37093	4.76449
ENSMUST00000044048	5.64386e-05	0.00223615	2.91382	down	Yes	chr7	heat shock protein, alpha-crystallin-related, B6 [Source:MGI Symbol;Acc:MGI:2685325]	ENSMUSG00000036854	Hspb6		chr7:30553268-30555443:+	NM_001012401	1363	CGCCCCCAGTGTGGCGTTACCCACAGCCCAGGTGTCCACGGACTCTGGGTATTTTTCCGT	GENCODE	+	Cytoplasm		ASMM10AP1B121799320V4	30555443	30553268	protein_coding	123.84	492.783	7.14779	8.69071	139.823	112.66	100.065	128.28	138.371	527.987	484.015	478.549	421.236	552.129	7.27465	6.84434	7.04441	7.27361	7.30196	9.079	9.0031	8.37736	8.16607	8.82801
ENSMUST00000086368	0.00804005	0.0337552	2.91046	down	Yes	chr5	2'-5' oligoadenylate synthetase 1G [Source:MGI Symbol;Acc:MGI:97429]	ENSMUSG00000066861	Oas1g		chr5:120876142-120887582:-	NM_011852	1977	CAGGGTCATTGGTAGCAACGATCAGCTTTATCACATTTAGTTAAATCACAATGATTGTGG	GENCODE	-			ASMM10AP1B100118509V4	120887582	120876142	protein_coding	6.97054	23.6046	2.76304	4.30429	5.73955	5.11357	5	13.9996	5	13.8331	32.1696	18.3279	34.2783	19.4143	2.57314	2.45525	2.33871	4.10354	2.34458	4.0684	5.26371	3.71741	4.59524	3.87669
ENSMUST00000102731	5.10608e-06	0.000651707	2.90797	down	Yes	chr11	TNFAIP3 interacting protein 1 [Source:MGI Symbol;Acc:MGI:1926194]	ENSMUSG00000020400	Tnip1		chr11:54910787-54962917:-	NM_001199275	2973	AGATCACCTCGTGCATTCTCGGATGAGTGACCTGGGCTGAAGACCCCGCCCCGGCGCCCA	GENCODE	-	Cytoplasm		ASMM10AP1B120642700V4	54962917	54910787	protein_coding	13.675	50.2651	3.89988	5.43989	17.3289	12.2726	13.1719	12.0028	13.5986	38.7228	47.6897	62.1555	55.3905	47.3672	4.16645	3.5515	3.91043	3.87914	3.99189	5.454	5.79361	5.47992	5.27253	5.19941
ENSMUST00000107682	0.000371383	0.0056708	2.90738	down	Yes	chr3	transmembrane protein 154 [Source:MGI Symbol;Acc:MGI:2444725]	ENSMUSG00000056498	Tmem154		chr3:84666192-84704575:+	NM_177260	3342	CCCCAGCCCAAGTGACAATGAATCCTAAGTCCAAGAGGCGTTGATGTTTTCCAAGAGCGT	GENCODE	+			ASMM10AP1B111398315V4	84704575	84666192	protein_coding	6.52395	22.7258	2.77648	4.3162	5.98834	5	5	7.08986	9.54155	21.197	17.5958	30.0361	25.2423	19.5576	2.61585	2.33065	2.33871	3.13025	3.46693	4.64045	4.47707	4.42636	4.14988	3.88722
ENSMUST00000023477	0.00109066	0.00993535	2.90298	down	No	chr16	dynamin 1-like [Source:MGI Symbol;Acc:MGI:1921256]	ENSMUSG00000022789	Dnm1l	Yes	chr16:16312230-16358959:-	NM_001025947	3951	AGCTGGATCACGGGACAAGGTCCCATCTGCAGGTGGTGGGATTGGAGACGGTGGTCAGGA	GENCODE	-	Nucleus		ASMM10AP1B128854661V4	16358959	16312230	protein_coding	17.3854	64.3472	4.24036	5.77789	19.279	13.1242	14.128	19.0411	21.3548	69.6689	79.3646	61.6746	51.475	59.5528	4.32876	3.65644	4.02015	4.53382	4.66262	6.24184	6.48517	5.46809	5.16206	5.53228
ENSMUST00000028835	0.000167801	0.00377432	2.90071	down	Yes	chr2	cardiolipin synthase 1 [Source:MGI Symbol;Acc:MGI:1913836]	ENSMUSG00000027357	Crls1		chr2:132846666-132866785:+	NM_001024385	1924	GATACTGGAACCAGTGCTCATATGTCATGTAAATAGGATGAAACTTTCTATTTTTCAAAG	GENCODE	+			ASMM10AP1B100122420V4	132866785	132846666	protein_coding	186.849	724.436	7.70185	9.23826	178.202	157.319	110.158	241.424	247.139	683.733	700.112	794.881	811.743	631.71	7.66081	7.30742	7.19073	8.21141	8.13888	9.44507	9.52957	9.08411	9.09036	9.0422
ENSMUST00000114471	0.000780247	0.00823594	2.90015	down	Yes	chr16	Casitas B-lineage lymphoma b [Source:MGI Symbol;Acc:MGI:2146430]	ENSMUSG00000022637	Cblb	Yes	chr16:52031225-52208048:+	NM_001033238	6648	GAAATGCAGTTTTTACGACTTGTCTAATGTGGCAAAATAGCTATGTGTTCAATTAATTTA	GENCODE	+	Exosome		ASMM10AP1B100035723V4	52208048	52031225	protein_coding	342.48	1293.26	8.52477	10.0609	313.26	342.914	143.373	467.388	445.467	1334.21	1248.36	1448.74	1392.54	1042.44	8.50136	8.43142	7.6062	9.1087	8.97618	10.3972	10.3303	9.9327	9.85918	9.78507
ENSMUST00000111435	0.000419032	0.00600876	2.90002	down	Yes	chr1	myelin protein zero-like 1 [Source:MGI Symbol;Acc:MGI:1915731]	ENSMUSG00000026566	Mpzl1		chr1:165592240-165634529:-	NM_001083897	2285	GCGGGATTATACCGGCTGCAGTACCTCAGAGCGTTTGTCACCAGTTAAGCAGGCTCCACG	GENCODE	-	Nucleus		ASMM10AP1B119023370V4	165634529	165592240	protein_coding	13.2695	48.1442	3.84628	5.38234	14.4835	10.2838	14.5504	15.5219	11.5079	55.9886	46.2409	43.8246	41.6419	53.0251	3.8902	3.28508	4.06776	4.24612	3.74223	5.94502	5.75411	4.97551	4.87256	5.36448
ENSMUST00000053734	0.000699271	0.00778206	2.89679	down	Yes	chr2	dual oxidase 2 [Source:MGI Symbol;Acc:MGI:3036280]	ENSMUSG00000068452	Duox2		chr2:122279247-122298165:-	NM_177610	5744	ACCGGACTCCTGGGAACAGGGTAATGGGGCCCTCTCCCCGGCTGTACACGGAGGCACTGC	GENCODE	-			ASMM10AP1B128347601V4	122298165	122279247	protein_coding	1076.93	4333.27	10.2155	11.7499	871.326	775.296	673.614	1243.08	1821.33	2861.93	5026.12	5012.1	6064.37	2701.84	9.99771	9.74648	9.99319	10.4509	10.8891	11.4775	12.4107	11.6618	11.9642	11.2354
ENSMUST00000112101	2.41637e-05	0.00147991	2.89278	down	Yes	chr2	integrin alpha 6 [Source:MGI Symbol;Acc:MGI:96605]	ENSMUSG00000027111	Itga6		chr2:71786940-71856771:+	NM_001277970	4156	TACTGTGGAAGTGTGGATTCTTTAAGCGCTCTAGGTACGATGACAGCATTCCCCGATACC	GENCODE	+	Nucleus		ASMM10AP1B101323071V4	71856771	71786940	protein_coding	97.1287	375.03	6.77455	8.30701	104.986	101.601	63.7891	119.04	96.2283	350.888	358.784	388.663	370.748	406.067	6.84725	6.69234	6.36048	7.16809	6.80459	8.50829	8.5892	8.07283	7.98479	8.37993
ENSMUST00000209422	0.00940985	0.0373137	2.89009	down	Yes	chr16	receptor transporter protein 4 [Source:MGI Symbol;Acc:MGI:1915025]	ENSMUSG00000033355	Rtp4		chr16:23520291-23614222:+		1859	CCACAAAAGCAATTTGAGGAAGACAGTGAGCTGCTGAGTAACCCGGGGCCTCAGCTTCCA	GENCODE	+			ASMM10AP1B123886676V4	23614222	23520291	protein_coding	14.4597	49.6732	3.8564	5.38751	21.795	6.24685	9.35538	17.0954	17.8057	38.0931	66.848	37.406	63.5079	42.5109	4.51904	2.61267	3.3692	4.38707	4.39403	5.43253	6.24582	4.75075	5.4672	5.04126
ENSMUST00000022563	0.00173802	0.0132693	2.88817	down	Yes	chr14	myotubularin related protein 6 [Source:MGI Symbol;Acc:MGI:2145637]	ENSMUSG00000021987	Mtmr6		chr14:60265228-60302370:+	NM_144843	3813	ATGTTGTGGATACCAGGCCCAAGCTCAATGCAATAGCTAACAGAGCAGCTGGAAAAGGTT	GENCODE	+			ASMM10AP1B110835829V4	60302370	60265228	protein_coding	8.62183	28.7446	3.1299	4.66005	11.1539	7.57729	5	7.24381	12.1342	30.3019	30.756	27.2519	26.675	28.738	3.49708	2.83302	2.33871	3.16061	3.82006	5.12513	5.20451	4.28658	4.23023	4.45381
ENSMUST00000033540	0.000112795	0.00312539	2.88801	down	Yes	chrX	von Hippel-Lindau binding protein 1 [Source:MGI Symbol;Acc:MGI:1333804]	ENSMUSG00000031197	Vbp1		chrX:75514299-75534942:+	NM_011692	1595	AGAAGACCTTGACTTTCTTCGAGATCAGTTTACTACCACAGAAGTCAATATGGCCAGGGT	GENCODE	+			ASMM10AP1B117512471V4	75534942	75514299	protein_coding	209.434	834.849	7.90772	9.43779	204.147	256.762	162.328	182.724	241.21	916.399	988.556	770.429	753.304	745.557	7.86077	7.99031	7.80005	7.78927	8.0982	9.85994	10.0068	9.0422	8.9832	9.29683
ENSMUST00000093812	0.00250107	0.0161834	2.88361	down	Yes	chr9	CD109 antigen [Source:MGI Symbol;Acc:MGI:2445221]	ENSMUSG00000046186	Cd109		chr9:78615546-78716253:+	NM_153098	5860	AGTGGAATATGATAACGGGAAACTCAACCTTTATTTAGATTCTGTAAATGAATCCCAGTT	GENCODE	+			ASMM10AP1B107292822V4	78716253	78615546	protein_coding	10.207	34.727	3.34909	4.87696	11.1015	9.10302	5	15.6809	10.1497	20.2781	28.4136	36.8187	34.1487	53.976	3.49074	3.09729	2.33871	4.26229	3.55641	4.57898	5.10033	4.72698	4.59	5.38852
ENSMUST00000046875	7.2198e-05	0.00253354	2.88011	down	Yes	chr1	UDP-glucose glycoprotein glucosyltransferase 1 [Source:MGI Symbol;Acc:MGI:2443162]	ENSMUSG00000037470	Uggt1	Yes	chr1:36140027-36244305:-	NM_198899	9033	TACAAGGCCAAGGATGATACTCAGGTGAAAGGAACTGAGGTAAATGCCACGGTCATCGGG	GENCODE	-	Nucleus		ASMM10AP1B106370137V4	36244305	36140027	protein_coding	8.47461	29.6292	3.17577	4.7019	11.1933	8.62928	7.22828	7.24313	8.07902	30.0824	29.378	30.5646	33.1806	24.9403	3.503	3.02553	2.96466	3.16039	3.22528	5.11598	5.14584	4.45219	4.54767	4.24779
ENSMUST00000094476	0.000610718	0.00726259	2.87808	down	Yes	chr11	predicted gene 12185 [Source:MGI Symbol;Acc:MGI:3652173]	ENSMUSG00000048852	Gm12185		chr11:48904656-48927159:-	NM_001045540	5264	TCCATCACAGAAGTGTTATTGCCACCAGATCAAGGTCACCACTGCTGAGGTACCATTGAC	GENCODE	-			ASMM10AP1B115357783V4	48927159	48904656	protein_coding	69.2155	267.279	6.26241	7.78752	63.2872	64.4359	45.5942	90.9617	81.7985	167.678	305.5	199.995	320.297	342.924	6.09917	6.03264	5.82957	6.7763	6.57438	7.46641	8.36783	7.17637	7.78423	8.14274
ENSMUST00000073600	0.0175537	0.056019	2.8764	down	No	chr4	ERBB receptor feedback inhibitor 1 [Source:MGI Symbol;Acc:MGI:1921405]	ENSMUSG00000028967	Errfi1		chr4:150853919-150868892:+	NM_001356323	3036	GCCACCCTGGGGCCAAAAGACATGGAGAACAGCACTTTGACAGGGAATGAAAGCTACTGG	GENCODE	+			ASMM10AP1B105407572V4	150868892	150853919	protein_coding	71.571	250.385	6.06357	7.58784	36.8628	41.021	33.5944	147.093	99.2841	187.458	133.207	344.235	433.622	153.403	5.29117	5.35368	5.34956	7.47747	6.84599	7.62452	7.22317	7.91198	8.20839	6.97112
ENSMUST00000021217	2.66813e-05	0.00157081	2.87631	down	Yes	chr11	NME/NM23 nucleoside diphosphate kinase 2 [Source:MGI Symbol;Acc:MGI:97356]	ENSMUSG00000020857	Nme2		chr11:93949814-93956259:-	NM_008705	1012	GGTGGTCGTTCTATTCTCTTTGCTTCTGTCGCTCATCGCAGACACCAGCCGACCCACCGG	GENCODE	-	Exosome;Nucleus	Yes	ASMM10AP1B100112225V4	93956259	93949814	protein_coding	170.346	661.892	7.57988	9.10409	170.676	150.366	109.048	190.939	230.7	609.031	562.27	772.508	758.18	607.473	7.59458	7.24216	7.17509	7.85992	8.02764	9.28425	9.21804	9.04562	8.99075	8.98181
ENSMUST00000149529	2.49327e-05	0.00149622	2.87585	down	Yes	chr7	troponin I, skeletal, fast 2 [Source:MGI Symbol;Acc:MGI:105070]	ENSMUSG00000031097	Tnni2		chr7:142442330-142444368:+		768	GCCTCACGCAAGGCGGACACTGACACCATCACCTCTCTCCCCACAGGATCAGAGCTTGAG	GENCODE	+			ASMM10AP1B118344271V4	142444368	142442330	protein_coding	1718.02	6987.33	10.9353	12.4593	1396.9	1373.65	1122.4	2092.3	2604.83	4569.4	5630.77	8897.23	10659.8	5179.44	10.7118	10.6592	10.8207	11.1049	11.3797	12.1937	12.5693	12.4978	12.8053	12.2302
ENSMUST00000171929	0.00328977	0.0192459	2.87426	down	Yes	chr1	centromere protein F [Source:MGI Symbol;Acc:MGI:1313302]	ENSMUSG00000026605	Cenpf		chr1:189640606-189688086:-	NM_001081363	11130	TGCGTGAAGAACTGCAGAACACCAAAGCAGCGCACCTGAAATCTGTGAATCAACTTGAGA	GENCODE	-		Yes	ASMM10AP1B107758224V4	189688086	189640606	protein_coding	11.1188	39.227	3.49885	5.02204	13.4014	17.1667	9.10308	5.00392	10.9188	22.167	60.3894	46.8186	34.3824	32.3774	3.77106	4.05329	3.32555	2.67966	3.66467	4.69657	6.10431	5.07424	4.60036	4.6347
ENSMUST00000180458	2.37342e-05	0.00147522	2.87391	down	Yes	chr12	Tcl1 upstream neural differentiation associated RNA [Source:MGI Symbol;Acc:MGI:1917202]	ENSMUSG00000097929	Tunar		chr12:105336594-105383932:+	NR_045047	3282	CTCCTCCCACGCTGGTCCGCACCACTCTCCGCACCGCCAGCCACCCTCCGAGATCTTCCC	GENCODE	+			ASMM10AP1B121456661V4	105383932	105336594	protein_coding	506.473	2248.32	9.21946	10.7425	471.697	507.536	415.919	546.19	591.021	1433.2	1586.63	3438.11	3305.43	1478.22	9.10215	9.08286	9.23495	9.31658	9.36077	10.499	10.6795	11.1406	11.0996	10.2937
ENSMUST00000042575	0.00444034	0.0232695	2.8735	down	Yes	chr4	topoisomerase I binding, arginine/serine-rich [Source:MGI Symbol;Acc:MGI:2146189]	ENSMUSG00000036822	Topors		chr4:40259601-40269850:-	NM_134097	3856	ATCTGGACTGGCAATAAGACAAATGTGTATTCAACAAAAGACAATAAAACTGTACACTCT	GENCODE	-		Yes	ASMM10AP1B100174993V4	40269850	40259601	protein_coding	1187.25	4129.41	10.1811	11.7039	906.498	739.584	405.722	2062.85	1821.6	4181.72	3673.96	4987.34	5221.25	2582.75	10.0577	9.67307	9.19858	11.0863	10.8896	12.056	11.9108	11.6571	11.7335	11.1619
ENSMUST00000063694	2.00202e-05	0.00131561	2.87329	down	Yes	chr7	Kruppel-like factor 13 [Source:MGI Symbol;Acc:MGI:1354948]	ENSMUSG00000052040	Klf13		chr7:63886351-63938915:-	NM_021366	6396	CGGATAAAACTTTGTTATGTATTTTGTAAGGCATAGATTCTATATTGTAATGTCCTATGC	GENCODE	-		Yes	ASMM10AP1B100142863V4	63938915	63886351	protein_coding	1654.09	6609.59	10.8704	12.3931	1708.5	1482.98	832.405	2097.51	2149.05	5919.21	4328.94	9627.02	7736.43	5436.35	11.016	10.7772	10.3331	11.1093	11.1166	12.5833	12.1651	12.6054	12.3055	12.3064
ENSMUST00000026572	2.01397e-06	0.000403858	2.86913	down	Yes	chr7	Harvey rat sarcoma virus oncogene [Source:MGI Symbol;Acc:MGI:96224]	ENSMUSG00000025499	Hras		chr7:141189105-141193960:-	NM_008284	2828	AGGAGTTGTCCCTGGCCCTGTTTGAGAGTTTTAGCAGGCTGGGTCCATTCTGAGCTGTGA	GENCODE	-	Cytoplasm		ASMM10AP1B114977174V4	141193960	141189105	protein_coding	64.5361	262.206	6.21679	7.73741	68.9772	68.77	65.8778	60.2402	58.8152	172.362	194.764	348.031	385.019	210.855	6.22885	6.13801	6.40775	6.1932	6.11616	7.50608	7.76128	7.92551	8.041	7.45317
ENSMUST00000020543	0.00252185	0.0162752	2.86812	down	Yes	chr11	cytoplasmic polyadenylation element binding protein 4 [Source:MGI Symbol;Acc:MGI:1914829]	ENSMUSG00000020300	Cpeb4	Yes	chr11:31872211-31931577:+	NM_026252	2312	TACCCAGGATCCGATAGTTCTCTGCTTATTAATGCAAGGACTTATGGGCGAAGGAGAGGT	GENCODE	+			ASMM10AP1B105973828V4	31931577	31872211	protein_coding	9.20437	30.6424	3.21592	4.73603	6.9287	10.8455	5	11.2179	12.0297	29.7274	30.9131	23.9896	39.6089	28.9729	2.79209	3.36649	2.33871	3.77685	3.80549	5.09933	5.2109	4.10387	4.80019	4.46587
ENSMUST00000025957	0.000840934	0.00864702	2.86641	down	Yes	chr19	family with sequence similarity 45, member A [Source:MGI Symbol;Acc:MGI:1915144]	ENSMUSG00000024993	Fam45a		chr19:60811611-60836227:+	NM_001360620	2307	TGCCGCCTTCACTAGGATATTGTGTAGAATATATTTGAAATATGGAAGTCCGGTTAAAAT	GENCODE	+			ASMM10AP1B117389293V4	60836227	60811611	protein_coding	22.7456	82.0596	4.61366	6.13291	27.945	15.8482	16.1782	26.01	27.7468	78.8454	91.6506	95.4304	76.439	67.9327	4.88195	3.93498	4.22122	4.99389	5.03628	6.40862	6.68419	6.11738	5.72392	5.73041
ENSMUST00000224300	0.00111391	0.0100782	2.86428	down	Yes	chr13	LysM, putative peptidoglycan-binding, domain containing 3 [Source:MGI Symbol;Acc:MGI:1915906]	ENSMUSG00000035840	Lysmd3		chr13:81657663-81672871:+	NM_030257	4250	GGGGTCTGATTTGCGTGGGTTTTGTGAAATAAAGTGCAGACCGTAAAATATGTCACATTA	GENCODE	+			ASMM10AP1B103153205V4	81672871	81657663	protein_coding	312.268	1168.72	8.40087	9.91905	292.176	274.66	145.413	413.711	435.378	1355.14	1133.8	1226.26	1057.6	1070.82	8.39381	8.09252	7.62868	8.94351	8.94584	10.4183	10.1988	9.68381	9.46832	9.82595
ENSMUST00000120580	0.00392277	0.0214987	2.8627	down	Yes	chr12	pre-mRNA processing factor 39 [Source:MGI Symbol;Acc:MGI:104602]	ENSMUSG00000035597	Prpf39	Yes	chr12:65036333-65063386:+	NM_177806	4069	GCGACATGACAACATTAAACAATCAGATGAGGTTTATCGACGGGGGCTTCAGGCAATACC	GENCODE	+	Nucleus		ASMM10AP1B104739361V4	65063386	65036333	protein_coding	22.2154	79.7925	4.5476	6.06498	26.0716	27.638	10.8143	20.5261	26.0269	113.655	84.2074	63.3897	62.3943	75.316	4.77897	4.76768	3.60114	4.6425	4.9477	6.91449	6.57095	5.51017	5.44315	5.88614
ENSMUST00000112633	9.76775e-05	0.00287024	2.86254	down	No	chr2	potassium inwardly-rectifying channel, subfamily J, member 3 [Source:MGI Symbol;Acc:MGI:104742]	ENSMUSG00000026824	Kcnj3		chr2:55437156-55595525:+		1679	AAGCATGCAAACTGAACAGTTCGAGGTTGTCGTCATCCTGGAAGGCATTGTGGAAACCAC	GENCODE	+			ASMM10AP1B100096749V4	55595525	55437156	protein_coding	24.4155	89.0981	4.73606	6.25335	31.2946	27.0005	20.8756	15.8316	27.075	86.5147	92.004	99.7472	94.4354	72.7893	5.05197	4.73377	4.61629	4.27447	5.0038	6.53364	6.69009	6.18474	6.0268	5.8315
ENSMUST00000030286	0.000373607	0.00569436	2.86134	down	Yes	chr4	dedicator of cytokinesis 7 [Source:MGI Symbol;Acc:MGI:1914549]	ENSMUSG00000028556	Dock7	Yes	chr4:98936671-99120915:-	NM_001290636	7127	CCAACCTGTTAAGAATTGCCCAAAACAGCATTTAATAAAACATTCATATAAATGGCTATA	GENCODE	-	Nucleus		ASMM10AP1B100105548V4	99120915	98936671	protein_coding	15.2216	53.1773	4.00378	5.52047	10.9976	14.7098	10.5036	17.8134	22.0834	48.6877	40.1847	63.2085	54.7731	59.0324	3.47525	3.82933	3.55768	4.44478	4.71185	5.75966	5.56356	5.50539	5.25471	5.51904
ENSMUST00000067556	0.00110147	0.00999844	2.86025	down	Yes	chr18	RIKEN cDNA 4930503L19 gene [Source:MGI Symbol;Acc:MGI:1922045]	ENSMUSG00000044906	4930503L19Rik		chr18:70453140-70472480:-	NM_172967	2291	CCCAGGACAATCCCAAAAGCCATTCTGTGGTGACAAAATTGAGTTGCTTATCCTGAAGGC	GENCODE	-	Nucleus		ASMM10AP1B106488448V4	70472480	70453140	protein_coding	9.4456	31.38	3.27056	4.7867	11.5052	11.9351	5	8.16987	10.6178	30.7582	33.0859	27.7324	31.2973	34.0263	3.54498	3.51267	2.33871	3.33072	3.62571	5.14469	5.30475	4.31116	4.46214	4.71077
ENSMUST00000112098	0.00164139	0.0127944	2.85975	down	Yes	chr14	polybromo 1 [Source:MGI Symbol;Acc:MGI:1923998]	ENSMUSG00000042323	Pbrm1	Yes	chr14:31019138-31120041:+	NM_001081251	6566	CCAACACCAATGGGGATGCTCAATCAGCAGTTGACACCTGTTGCAGGCATGATGGGTGGC	GENCODE	+	Nucleus	Yes	ASMM10AP1B120142423V4	31120041	31019138	protein_coding	7.50947	23.506	2.86491	4.3808	10.3145	6.50882	10.724	5	5	24.4361	23.465	22.8543	21.8047	24.9696	3.37778	2.65225	3.59087	2.35905	2.34458	4.83233	4.85256	4.03162	3.93722	4.25025
ENSMUST00000092033	2.46042e-05	0.00149051	2.85948	down	Yes	chr10	RNA binding motif, single stranded interacting protein 2 [Source:MGI Symbol;Acc:MGI:1861776]	ENSMUSG00000040043	Rbms2		chr10:128133107-128176479:-	NM_019711	1481	ACAACAAGAAGCTATATGTGGCTCAGCAAATGGCACCTCCAAGTCCAAGGAATAGCACCC	GENCODE	-	Cytoplasm		ASMM10AP1B108041944V4	128176479	128133107	protein_coding	16.441	58.7146	4.1513	5.66706	13.8397	23.868	14.1209	13.8467	16.5296	57.9395	53.4907	62.7515	64.3934	54.9979	3.81956	4.54821	4.01978	4.08613	4.28284	5.99182	5.94413	5.49433	5.48667	5.41834
ENSMUST00000062606	0.0151186	0.0504054	2.85823	down	Yes	chr5	uroplakin 3B [Source:MGI Symbol;Acc:MGI:2140882]	ENSMUSG00000042985	Upk3b		chr5:136038496-136046487:+	NM_175309	3530	TAGAGATGGATGGGGAAACTGGAGGACTGGGAGTTAAAGACTGTTGTCATATTTACAGTC	GENCODE	+			ASMM10AP1B100201280V4	136046487	136038496	protein_coding	6.43436	23.1862	2.71905	4.23417	5	5.44333	5	11.6197	5.10876	25.3764	21.7594	13.0181	13.6699	42.1072	2.33259	2.49657	2.33871	3.83026	2.59711	4.8855	4.75075	3.23054	3.27597	5.0281
ENSMUST00000079490	0.00418448	0.0224245	2.85695	down	Yes	chrX	nucleosome assembly protein 1-like 3 [Source:MGI Symbol;Acc:MGI:1859565]	ENSMUSG00000055733	Nap1l3		chrX:122394565-122397401:-	NM_138742	2837	TGATACATTATCATGTTCTTTTATTGTACCTGGAGTAAATATCAAATAAACTGCCATGCT	GENCODE	-	Cytoplasm	Yes	ASMM10AP1B100151517V4	122397401	122394565	protein_coding	96.5696	343.493	6.63159	8.14607	79.4735	72.9325	42.6344	134.282	153.526	383.935	304.679	366.87	443.324	218.658	6.4325	6.22121	5.72257	7.34108	7.4406	8.63253	8.36435	7.9955	8.23939	7.49859
ENSMUST00000064993	1.36761e-05	0.00109409	2.85639	down	No	chr6	ghrelin [Source:MGI Symbol;Acc:MGI:1930008]	ENSMUSG00000064177	Ghrl		chr6:113716119-113719880:-	NM_021488	527	CGGCAACTCCCAGCACTCTCCTACCACTTTAAGAATAAATGTTCACCTGTATGCCAAATG	GENCODE	-			ASMM10AP1B116286577V4	113719880	113716119	protein_coding	203.978	867.919	7.88926	9.40345	207.78	210.941	168.647	198.519	234.004	477.281	700.913	1242.14	1236.14	683.115	7.89113	7.72391	7.85788	7.92187	8.05152	8.93681	9.53113	9.70234	9.68942	9.15757
ENSMUST00000041297	0.00156424	0.0124781	2.85465	down	Yes	chr15	zinc finger, BED type containing 4 [Source:MGI Symbol;Acc:MGI:2682302]	ENSMUSG00000034333	Zbed4		chr15:88751660-88784516:+	NM_181412	5425	GTGCTTTAGTGTATTTATAAATGACGAACCTGGATTCTGAAATTAAACTTTTTATTTGCG	GENCODE	+		Yes	ASMM10AP1B100191112V4	88784516	88751660	protein_coding	694.451	2557.32	9.51124	11.0246	585.78	537.861	282.462	1104.57	961.577	2873.25	2124.99	2980.8	2872.23	1935.31	9.41354	9.17478	8.64774	10.2815	10.0387	11.4853	11.1049	10.938	10.8815	10.7131
ENSMUST00000054691	0.00248894	0.0161308	2.85392	down	Yes	chr8	forkhead box C2 [Source:MGI Symbol;Acc:MGI:1347481]	ENSMUSG00000046714	Foxc2		chr8:121116171-121118895:+	NM_013519	2725	TTATGTGATCTCAGTGTTGTATTTACCTTAAAATAAACCCGTGTTGTTTTTCTGCCCAAA	GENCODE	+		Yes	ASMM10AP1B100201466V4	121118895	121116171	protein_coding	215.976	767.798	7.80936	9.32231	176.142	189.037	82.1964	313.697	318.808	721.533	684.861	910.109	855.844	666.641	7.64258	7.56915	6.74649	8.57845	8.51014	9.53182	9.49828	9.27701	9.17911	9.12532
ENSMUST00000120779	0.00217005	0.0149404	2.84995	down	Yes	chr4	nuclear transcription factor-Y gamma [Source:MGI Symbol;Acc:MGI:107901]	ENSMUSG00000032897	Nfyc	Yes	chr4:120757438-120815712:-	NM_001357192	2006	TAATGCAGTTCTCGTTGTGAAAATGTCCACAGAAGGAGGGTTTGGCGGTACCAGCAGCAG	GENCODE	-	Exosome	Yes	ASMM10AP1B102293611V4	120815712	120757438	protein_coding	11.2104	37.7227	3.52346	5.0344	10.2128	10.6752	5.62437	12.7059	16.8338	37.2187	37.4601	39.2608	45.0155	29.6583	3.36474	3.34463	2.63399	3.96288	4.31107	5.40106	5.46937	4.82035	4.97835	4.50288
ENSMUST00000031549	0.00106784	0.00983591	2.84867	down	Yes	chr18	predicted gene 4951 [Source:MGI Symbol;Acc:MGI:3644953]	ENSMUSG00000073555	Gm4951		chr18:60212080-60247820:+	NM_001033767	2645	CGGAGCAATTCTAGGATTTGTTGTGCCTTTATTGCTTGAAGTGATGGGTCAACTGTTCTC	GENCODE	+			ASMM10AP1B113873914V4	60247820	60212080	protein_coding	8.43269	29.3998	3.1124	4.62268	8.71018	7.77733	5	11.4201	9.25583	13.5813	27.4951	32.3759	41.986	31.5605	3.12569	2.86974	2.33871	3.80549	3.42236	4.04334	5.05568	4.53407	4.88229	4.59805
ENSMUST00000148661	0.0001477	0.00354819	2.84766	down	No	chr14	transmembrane and tetratricopeptide repeat containing 4 [Source:MGI Symbol;Acc:MGI:1921050]	ENSMUSG00000041594	Tmtc4		chr14:122919760-122983142:-		2719	GGGCGGTCTGCGCCTGGGTAGAAGCCGCACCCCGGACAAAGAGCGCGCGATTTCTAACGA	GENCODE	-	Nucleus		ASMM10AP1B128082237V4	122983142	122919760	protein_coding	28.9873	106.361	4.99776	6.50754	29.2755	27.5296	23.427	24.495	40.2096	105.359	110.546	123.029	106.24	86.6299	4.95164	4.7622	4.79044	4.90464	5.57987	6.809	6.95178	6.48837	6.19511	6.09342
ENSMUST00000033163	0.00018084	0.00387647	2.84704	down	Yes	chr7	methyltransferase like 9 [Source:MGI Symbol;Acc:MGI:1914862]	ENSMUSG00000030876	Mettl9		chr7:121034445-121076835:+	NM_021554	1823	GCGGGCGGCGGGAAGGACACGCACCAGTGGTATGTGTGCAACAGAGAGAAATTATGCGAA	GENCODE	+	Nucleus		ASMM10AP1B102223269V4	121076835	121034445	protein_coding	70.192	263.133	6.30088	7.81035	75.9108	66.4153	48.8644	69.6355	90.1339	292.109	279.827	279.223	235.174	229.334	6.3653	6.08379	5.94427	6.39723	6.71381	8.25705	8.25375	7.63406	7.33941	7.56746
ENSMUST00000026859	0.000145341	0.00353214	2.84664	down	Yes	chr3	major facilitator superfamily domain containing 8 [Source:MGI Symbol;Acc:MGI:1919425]	ENSMUSG00000025759	Mfsd8		chr3:40818103-40846885:-	NM_028140	3151	TTTCCAAAAAGATTGGCGAGCGTGCTATTCTCCTGGGAGGATTTGTGGTTGTATGGGTCG	GENCODE	-	Nucleus		ASMM10AP1B114150369V4	40846885	40818103	protein_coding	11.7517	41.2971	3.66464	5.17389	14.3939	13.8691	10.2411	10.4916	9.76281	43.6591	44.9928	39.5848	35.7994	42.4492	3.88149	3.74109	3.51463	3.68272	3.50326	5.62067	5.71982	4.8318	4.65834	5.03884
ENSMUST00000089473	0.00415468	0.0223364	2.84656	down	Yes	chr14	zinc finger, DHHC domain containing 20 [Source:MGI Symbol;Acc:MGI:1923215]	ENSMUSG00000021969	Zdhhc20		chr14:57832703-57890276:-	NM_029492	5186	ACTACTTGTTCATAACTAACCATTTGATGAGTGCAAGGTATATAAAAACACATTTTGGAC	GENCODE	-			ASMM10AP1B114069178V4	57890276	57832703	protein_coding	77.9747	261.5	6.2961	7.80532	54.9779	67.0205	31.5762	132.333	103.966	265.696	227.086	273.809	297.218	243.691	5.89246	6.09718	5.26301	7.31591	6.91195	8.12338	7.97313	7.60534	7.67142	7.65334
ENSMUST00000131252	0.000618112	0.00730377	2.84603	down	Yes	chr19	splicing factor 1 [Source:MGI Symbol;Acc:MGI:1095403]	ENSMUSG00000024949	Sf1		chr19:6363690-6378030:+	NM_001110791	4353	AGGGGGAAATGTTCCATTGAATAAAAGAGCAGTGTGGTTTTCCGGGTCCGTTTCTTTTCT	GENCODE	+	Cytoplasm;Exosome	Yes	ASMM10AP1B102083631V4	6378030	6363690	protein_coding	3558.57	11925.7	11.8371	13.3461	2860.73	2440.52	1363.72	6200.07	4927.82	12103	9285.4	15913.2	13268.6	9058.31	11.7752	11.491	11.1251	12.5628	12.2316	13.6948	13.3859	13.4038	13.1513	13.0945
ENSMUST00000074608	4.14654e-06	0.00056828	2.84432	down	Yes	chr15	RIKEN cDNA 1700029P11 gene [Source:MGI Symbol;Acc:MGI:1913596]	ENSMUSG00000061633	1700029P11Rik		chr15:81980540-81981563:+	NM_025503	1024	TTCAGATTGCCTGCCCCGCTATGTTTCTTTTAAACTATAATAAAATGGTTCTTAAGCCTC	GENCODE	+			ASMM10AP1B100092987V4	81981563	81980540	protein_coding	22.2351	83.7481	4.61531	6.1234	24.2387	27.4702	22.5293	15.2881	21.6492	49.7056	65.7612	108.334	111.371	83.5682	4.67438	4.75879	4.7331	4.22693	4.68337	5.78647	6.22306	6.30467	6.26223	6.04057
ENSMUST00000030164	0.000119158	0.00321343	2.84183	down	Yes	chr4	valosin containing protein [Source:MGI Symbol;Acc:MGI:99919]	ENSMUSG00000028452	Vcp		chr4:42979963-43000507:-	NM_009503	3316	TGGTTTGGGGAATCTGAGGCCAATGTCCGGGAAATTTTTGACAAGGCACGGCAAGCTGCC	GENCODE	-			ASMM10AP1B101354715V4	43000507	42979963	protein_coding	181.447	695.225	7.6781	9.18492	232.801	212.721	119.353	149.577	192.782	735.169	742.937	721.526	611.441	665.051	8.06547	7.73451	7.32003	7.50217	7.7683	9.55676	9.60904	8.9503	8.69151	9.11698
ENSMUST00000051446	0.00114357	0.0102675	2.84141	down	Yes	chr10	jumonji domain containing 1C [Source:MGI Symbol;Acc:MGI:1918614]	ENSMUSG00000037876	Jmjd1c	Yes	chr10:67127258-67256326:+	NM_207221	8382	CCCGGACCTGGCGGTCTACGTGGAATTTGATGACCTTGAGTGGGATAAACGGGAGTGGGT	GENCODE	+	Nucleus	Yes	ASMM10AP1B100757358V4	67256326	67127258	protein_coding	10.2698	34.2418	3.40369	4.9103	11.6208	6.59695	6.85536	15.0585	11.2175	29.6468	32.2245	40.4407	35.726	33.1712	3.55983	2.66476	2.881	4.20685	3.70603	5.09425	5.26698	4.8618	4.65546	4.67301
ENSMUST00000045942	0.0111159	0.0412285	2.84063	down	Yes	chr6	empty spiracles homeobox 1 [Source:MGI Symbol;Acc:MGI:95387]	ENSMUSG00000033726	Emx1		chr6:85187438-85204358:+	NM_010131	1561	ACCCTCTCCACTTCTACCCCTGGGTGCTTCGGAATCGCTTCTTTGGCCACCGCTTCCAGG	GENCODE	+		Yes	ASMM10AP1B100235024V4	85204358	85187438	protein_coding	916.607	4269.04	9.93061	11.4368	621.177	655.728	498.285	1217.01	1590.83	1404.86	1636.04	7538.83	7604.94	3160.52	9.50799	9.49017	9.52102	10.4215	10.7123	10.4708	10.7218	12.248	12.2799	11.4636
ENSMUST00000064771	0.00044429	0.00622165	2.8397	down	Yes	chr1	SWT1 RNA endoribonuclease homolog (S. cerevisiae) [Source:MGI Symbol;Acc:MGI:1914125]	ENSMUSG00000052748	Swt1		chr1:151367699-151428455:-	NM_025819	3688	ACTTGCTTGTAACTGTTGAGAGCCTATATGAAAATCTCTGTAAAGCAAATAAGGCAGTGG	GENCODE	-	Exosome		ASMM10AP1B105718637V4	151428455	151367699	protein_coding	64.3563	230.897	6.12643	7.63217	75.3811	60.832	33.4956	69.6745	82.3982	245.195	201.621	244.007	211.917	251.747	6.35391	5.94889	5.34505	6.39839	6.58592	8.012	7.80819	7.44615	7.19328	7.70123
ENSMUST00000023687	4.40194e-05	0.00197851	2.83899	down	Yes	chr16	interferon gamma receptor 2 [Source:MGI Symbol;Acc:MGI:107654]	ENSMUSG00000022965	Ifngr2		chr16:91547072-91565623:+	NM_008338	3708	ACCAGTGGTCTACCAGGTGGAATATAGCTTCATCGATGGCTCTTGGCATAGGTTGCTGGA	GENCODE	+			ASMM10AP1B114089436V4	91565623	91547072	protein_coding	78.1785	289.73	6.44523	7.95061	99.6799	86.5361	50.2921	63.7454	90.6388	278.233	282.96	299.253	293.093	295.111	6.76858	6.47252	5.98826	6.27624	6.72055	8.18127	8.26503	7.7249	7.65442	7.9274
ENSMUST00000040860	0.00242349	0.0158829	2.83879	down	Yes	chr18	proteasome (prosome, macropain) subunit, alpha type, 8 [Source:MGI Symbol;Acc:MGI:1920927]	ENSMUSG00000036743	Psma8		chr18:14706151-14762299:+	NM_001163609	1693	TTAGCAATAAAAGCTTTGCTCGAAGTTGTCCAGTCTGGCGGAAAGAACATTGAACTGGCT	GENCODE	+			ASMM10AP1B116047612V4	14762299	14706151	protein_coding	9.02324	29.5155	3.19011	4.69538	12.2053	5.81625	5	10.0515	12.0432	24.0218	29.6346	29.7906	27.7843	36.3462	3.6362	2.54659	2.33871	3.62184	3.80719	4.80724	5.15835	4.41652	4.28858	4.80622
ENSMUST00000118009	0.000194848	0.00400722	2.83556	down	Yes	chr8	nuclear assembly factor 1 ribonucleoprotein [Source:MGI Symbol;Acc:MGI:2682306]	ENSMUSG00000014907	Naf1		chr8:66860217-66890564:+	NM_001163564	2990	AATGAGTCAGGTGAAGATTTTGGTGAAGTGCATGAGAATTGGAATGCTTATAGCTCTTCA	GENCODE	+			ASMM10AP1B107553695V4	66890564	66860217	protein_coding	5.37294	18.0376	2.48697	3.9906	5	5	5	6.8647	5	16.0325	15.7528	25.8377	15.3996	17.1654	2.33259	2.33065	2.33871	3.0883	2.34458	4.27135	4.33465	4.20839	3.44767	3.69093
ENSMUST00000062580	0.000328214	0.00535317	2.83241	down	Yes	chr12	intersectin 2 [Source:MGI Symbol;Acc:MGI:1338049]	ENSMUSG00000020640	Itsn2	Yes	chr12:4593008-4713950:+	NM_011365	5987	GGTGCATGTCATTGAAGCTACAGAATTAAAAGCCTGCAAACCAAACGGGAAAAGTAATCC	GENCODE	+	Nucleus		ASMM10AP1B105181281V4	4713950	4593008	protein_coding	24.4774	88.608	4.73802	6.24005	28.4139	32.1685	17.9167	25.324	18.5638	106.823	76.9614	86.769	68.7863	103.7	4.9062	4.99283	4.381	4.95608	4.45402	6.82854	6.44218	5.97567	5.58037	6.37352
ENSMUST00000034981	0.000911209	0.00903107	2.83069	down	Yes	chr9	5'-3' exoribonuclease 1 [Source:MGI Symbol;Acc:MGI:891964]	ENSMUSG00000032410	Xrn1		chr9:95954760-96053027:+	NM_011916	5499	TCAGCACATCCTAAGCCAAGTAAGAAGCTGACATGCCATATGAACAAGCCTCATGGGACT	GENCODE	+	Nucleus		ASMM10AP1B100677629V4	96053027	95954760	protein_coding	20.3451	71.4224	4.43489	5.93605	25.335	24.6835	12.2528	14.4929	24.9615	83.5465	73.0369	71.0505	59.2162	70.2617	4.73797	4.5988	3.79255	4.15528	4.88986	6.48697	6.36858	5.68195	5.36641	5.77632
ENSMUST00000066296	0.000171109	0.00381459	2.83034	down	Yes	chr12	TOG array regulator of axonemal microtubules 1 [Source:MGI Symbol;Acc:MGI:2684313]	ENSMUSG00000035614	Togaram1		chr12:64965804-65022573:+	NM_177805	6372	GAGTCAACATGTAGACAATTACTTGCTTCTACAGCCATTTTGCACAAAAGCTCAGTTTCT	GENCODE	+			ASMM10AP1B119232894V4	65022573	64965804	protein_coding	96.4376	369.603	6.77614	8.27712	113.92	96.9412	72.8313	87.1226	111.373	425.894	383.652	368.004	293	377.464	6.97206	6.6294	6.55983	6.71704	7.00238	8.77084	8.685	7.99909	7.65372	8.27693
ENSMUST00000036691	0.000634539	0.00743482	2.82972	down	No	chr2	proline-rich coiled-coil 2B [Source:MGI Symbol;Acc:MGI:1923304]	ENSMUSG00000039262	Prrc2b	Yes	chr2:32151082-32234537:+	NM_172661	8612	GGTCCGCACCATCCCCGCAGGCATACAGGCAAAGCGAGTGGATGAAAAACCCGGCCTGGG	GENCODE	+	Exosome		ASMM10AP1B122863108V4	32234537	32151082	protein_coding	15.7767	60.4746	4.10005	5.60071	16.0352	12.6237	14.7543	14.0919	21.3784	47.0495	35.1656	104.825	75.9851	39.3473	4.04674	3.59413	4.08437	4.11069	4.66431	5.71299	5.38546	6.26036	5.71572	4.92903
ENSMUST00000105693	0.0011526	0.0103166	2.82862	down	Yes	chr4	nicotinamide nucleotide adenylyltransferase 1 [Source:MGI Symbol;Acc:MGI:1913704]	ENSMUSG00000028992	Nmnat1		chr4:149468599-149485172:-		1378	CCTGTGACCTTGGTGCAGACAACATCGCTGTCAGAGGGTTGCATGTAGGTCAACACCACC	GENCODE	-			ASMM10AP1B107016962V4	149485172	149468599	protein_coding	7.16771	23.2637	2.85857	4.35866	8.38715	7.07504	5.12758	5	10.2488	28.3123	21.2069	22.2245	22.7107	21.864	3.07269	2.74754	2.54196	2.35905	3.57159	5.03374	4.71338	3.99805	3.99628	4.05188
ENSMUST00000037726	0.00132474	0.0113112	2.82806	down	Yes	chr14	transmembrane and tetratricopeptide repeat containing 4 [Source:MGI Symbol;Acc:MGI:1921050]	ENSMUSG00000041594	Tmtc4		chr14:122918971-122983283:-	NM_001360598	3416	CCTAATAATTTATGCCATCGCTGTCATTTCTTATGCAGTAAAATTATCACACAAACTGTC	GENCODE	-	Nucleus		ASMM10AP1B100039866V4	122983283	122918971	protein_coding	198.03	741.134	7.74519	9.245	170.76	177.836	95.5068	265.469	280.579	725.283	714.009	939.564	838.441	488.372	7.59572	7.48032	6.97377	8.34675	8.32937	9.53987	9.55616	9.32759	9.14528	8.65608
ENSMUST00000099994	0.000264449	0.00477297	2.82671	down	Yes	chr2	tetratricopeptide repeat domain 30A1 [Source:MGI Symbol;Acc:MGI:1926052]	ENSMUSG00000075271	Ttc30a1		chr2:75978247-75981967:-	NM_030188	3721	TCACACTTCCCTTCCAAGAATGGCTAGATACTTCTCTTAGAAACCAACTTCCTGGATACG	GENCODE	-			ASMM10AP1B100008048V4	75981967	75978247	protein_coding	28.0327	112.351	4.95014	6.44926	27.7997	37.6836	20.4988	27.943	26.2386	49.8198	60.5752	170.767	157.267	123.325	4.87443	5.2255	4.58861	5.10191	4.96024	5.7896	6.10848	6.95959	6.76041	6.62823
ENSMUST00000167107	0.00764286	0.0326075	2.82628	down	Yes	chr17	zinc finger protein 101 [Source:MGI Symbol;Acc:MGI:107547]	ENSMUSG00000055240	Zfp101		chr17:33380179-33394641:-	NM_009542	2735	TCAGGTTCATGGAAGTTCTCGAGAGAAATCCTATGAAAATCAGCAATGTGATGCAGCTCA	GENCODE	-		Yes	ASMM10AP1B119441583V4	33394641	33380179	protein_coding	11.5339	38.1918	3.52886	5.02776	16.2596	12.9084	5	10.8163	12.6855	48.1038	45.0728	32.1588	37.4594	28.1642	4.06817	3.63019	2.33871	3.72509	3.88213	5.74445	5.72337	4.52295	4.72388	4.42418
ENSMUST00000181969	0.000956481	0.00929056	2.82625	down	Yes	chr14	Nedd4 family interacting protein 2 [Source:MGI Symbol;Acc:MGI:1923523]	ENSMUSG00000053253	Ndfip2		chr14:105258573-105309298:+	NM_001190989	2532	TGTTCTGTTAATAGTGCCTCGTTTAGTGATTCCAAGACTAATTTGTAAAAACGTACAGCC	GENCODE	+	Nucleus		ASMM10AP1B112185845V4	105309298	105258573	protein_coding	439.02	1639.14	8.89315	10.392	388.945	391.715	201.774	624.5	588.168	1857.16	1605.46	1814.03	1637.38	1281.67	8.82074	8.64684	8.13612	9.50755	9.35449	10.8505	10.6968	10.2427	10.0879	10.0823
ENSMUST00000042052	0.000772954	0.00818998	2.82613	down	Yes	chr12	HECT domain E3 ubiquitin protein ligase 1 [Source:MGI Symbol;Acc:MGI:2384768]	ENSMUSG00000035247	Hectd1	Yes	chr12:51743722-51829536:-	NM_144788	8988	GACTTCTGTATGCATACGGGTATTCAGAAACAGATGGAAGCTTTTCGAGATGGGTTTAAT	GENCODE	-	Nucleus		ASMM10AP1B105538054V4	51829536	51743722	protein_coding	132.15	497.639	7.2001	8.69893	186.306	146.5	79.4885	114.45	134.006	557.587	580.681	451.64	394.498	503.788	7.72562	7.20861	6.69576	7.11036	7.26016	9.15722	9.26741	8.29356	8.07465	8.70179
ENSMUST00000021375	3.17801e-05	0.00175354	2.82187	down	Yes	chr12	SEC23 homolog A, COPII coat complex component [Source:MGI Symbol;Acc:MGI:1349635]	ENSMUSG00000020986	Sec23a		chr12:58958383-59012017:-	NM_001361956	4109	GCCTGCAGAGCTTTTACCTCAGTTTTCAAGCATTGAATATGTAGTTCTGCGTGGTCCCCA	GENCODE	-	Nucleus		ASMM10AP1B118076458V4	59012017	58958383	protein_coding	16.0175	57.161	4.1272	5.62385	17.1625	19.6502	12.4212	14.1043	16.7491	49.9662	62.5767	62.2835	61.46	49.5185	4.15151	4.25293	3.81658	4.11229	4.30269	5.79401	6.15389	5.48257	5.41891	5.26986
ENSMUST00000053871	0.000290326	0.00501473	2.82017	down	Yes	chr10	cytoskeleton-associated protein 4 [Source:MGI Symbol;Acc:MGI:2444926]	ENSMUSG00000046841	Ckap4		chr10:84526305-84534062:-	NM_175451	3089	TGTGAGAGCTGTATTTTCCACAGAGGATTTGGGCATCTTCCCGAGAGATGTGGGCCAGGT	GENCODE	-	Nucleus		ASMM10AP1B116965206V4	84534062	84526305	protein_coding	65.8586	243.766	6.20077	7.69655	69.7487	53.2084	47.4687	82.1784	76.6886	298.172	189.223	231.936	226.975	272.522	6.24233	5.74472	5.89467	6.63396	6.48817	8.28554	7.71887	7.37428	7.29038	7.81369
ENSMUST00000110729	0.000678084	0.00767936	2.82002	down	No	chr2	transmembrane protein 87A [Source:MGI Symbol;Acc:MGI:2441844]	ENSMUSG00000033808	Tmem87a		chr2:120363294-120404078:-		1578	TGAAGAAAACTCACTGTTCTGATTTGTGCTTCTAGTATTTTTTTTCCAAGAAAATAATTT	GENCODE	-			ASMM10AP1B100219623V4	120404078	120363294	protein_coding	54.605	195.618	5.88089	7.37659	59.7471	38.4421	33.3208	73.7037	67.8112	211.988	150.49	232.014	221.561	162.035	6.01507	5.25554	5.33691	6.47893	6.31799	7.80654	7.39264	7.37466	7.25518	7.05393
ENSMUST00000175726	0.000925231	0.00909992	2.8148	down	Yes	chr19	RIKEN cDNA 9930021J03 gene [Source:MGI Symbol;Acc:MGI:2444398]	ENSMUSG00000046138	9930021J03Rik	Yes	chr19:29714402-29805507:-	NM_172836	7524	ACTGAGTTGCTGTATTTCTTTGTTTGAATACCATTTTTAAAATGTGTTCTTGTCCATTGA	GENCODE	-			ASMM10AP1B102479809V4	29805507	29714402	protein_coding	49.3423	173.575	5.71422	7.20726	38.9064	43.1484	28.2622	74.8304	61.5639	183.311	139.559	199.908	202.113	142.983	5.37476	5.42582	5.08771	6.49936	6.18346	7.5933	7.28661	7.17486	7.12057	6.86095
ENSMUST00000129321	0.0419956	0.101484	2.8148	down	Yes	chr11	ring finger protein 227 [Source:MGI Symbol;Acc:MGI:1915359]	ENSMUSG00000043419	Rnf227		chr11:69340461-69342641:+		2081	GTTTGCTGAATTTATTTTGAATGTAATAGTCTCTAGAATAAAGTATCTGGGCTCATTCAA	GENCODE	+			ASMM10AP1B100167293V4	69342641	69340461	protein_coding	59.1264	162.308	5.59255	7.08559	36.3223	24.3537	14.9509	127.072	92.9334	134.452	119.049	215.381	209.098	133.562	5.26867	4.5799	4.10298	7.25913	6.7521	7.15702	7.06183	7.27566	7.17341	6.76001
ENSMUST00000030127	0.000856258	0.00871902	2.81244	down	Yes	chr4	transmembrane protein 38B [Source:MGI Symbol;Acc:MGI:1098718]	ENSMUSG00000028420	Tmem38b		chr4:53826045-53862019:+	NM_028053	2862	TTTGAGTGGCACTTTTGATAACCTACGTACGAGAAAAATGCTTATTTTTGATATTGTGAC	GENCODE	+			ASMM10AP1B100181239V4	53862019	53826045	protein_coding	1868.77	6945.93	11.0332	12.525	2463.12	1553.15	901.202	2027.95	2398.41	8432.49	7342.12	6670.46	6655.59	5628.96	11.5542	10.8358	10.4419	11.065	11.2692	13.1206	12.9589	12.0849	12.0889	12.3717
ENSMUST00000032946	0.00241496	0.0158604	2.80942	down	Yes	chr7	RAB6A, member RAS oncogene family [Source:MGI Symbol;Acc:MGI:894313]	ENSMUSG00000030704	Rab6a	Yes	chr7:100607586-100641268:+	NM_024287	3214	TTATCAAAAACAATGTACTTGGAGGATAGAACCGTGCGATTGCAATTATGGGACACAGCA	GENCODE	+			ASMM10AP1B103027783V4	100641268	100607586	protein_coding	59.7899	212.356	6.00676	7.49703	75.3825	60.9046	28.3997	60.7867	73.4762	255.696	247.198	197.105	181.626	180.155	6.35407	5.95069	5.09456	6.20548	6.42901	8.07001	8.08926	7.15171	6.966	7.20818
ENSMUST00000065169	8.65925e-06	0.000846682	2.80831	down	Yes	chr8	GATA zinc finger domain containing 2A [Source:MGI Symbol;Acc:MGI:2384585]	ENSMUSG00000036180	Gatad2a	Yes	chr8:69908470-69996384:-	NM_145596	3812	CTCCTCCTAATAAAGGCTCATTTAACTCCATGCTCACCTGTGTGGAAATCCTCCATCTTT	GENCODE	-	Cytoplasm	Yes	ASMM10AP1B102352002V4	69996384	69908470	protein_coding	747.971	2959.13	9.75186	11.2416	821.318	780.744	427.552	910.48	799.76	2700.39	2187.18	3972.09	3046.87	2889.12	9.91461	9.76079	9.27829	10.0208	9.78481	11.3976	11.1523	11.35	10.9771	11.3309
ENSMUST00000023524	0.000246632	0.00462297	2.80799	down	Yes	chr16	RAB, member RAS oncogene family-like 3 [Source:MGI Symbol;Acc:MGI:1914907]	ENSMUSG00000022827	Rabl3		chr16:37539885-37572385:+	NM_001042499	2031	CGGAGTCCTGGTGACAAATGGGGATTATGACCGAGAACAGTTTGCTGATAACCAAATCCC	GENCODE	+			ASMM10AP1B107648367V4	37572385	37539885	protein_coding	8.00339	27.232	3.09611	4.58565	6.15233	8.66599	10.6338	6.27963	8.28526	26.7288	28.0968	29.0732	27.664	24.5971	2.645	3.03102	3.57837	2.96352	3.26264	4.95663	5.08509	4.37887	4.28189	4.22575
ENSMUST00000076623	0.00429664	0.0227846	2.80712	down	Yes	chr5	ArfGAP with RhoGAP domain, ankyrin repeat and PH domain 2 [Source:MGI Symbol;Acc:MGI:2684416]	ENSMUSG00000037999	Arap2	Yes	chr5:62602445-62766120:-	NM_178407	7306	GAGAAATGCGACCCAGGCCCGTAAGAATATTGAGACGGCCAGAGCAGAGCTTGAAAGGCT	GENCODE	-			ASMM10AP1B100748353V4	62766120	62602445	protein_coding	10.2301	31.8275	3.30396	4.79305	17.8719	11.8931	10.0857	6.29982	5	35.4702	31.7061	28.0217	37.3966	26.5429	4.21119	3.50796	3.48823	2.96784	2.34458	5.33525	5.2428	4.32756	4.72144	4.33821
ENSMUST00000092154	0.000548398	0.00689933	2.80658	down	Yes	chr3	RNA-binding region (RNP1, RRM) containing 3 [Source:MGI Symbol;Acc:MGI:1914475]	ENSMUSG00000027981	Rnpc3		chr3:113605067-113630149:-	NM_001038696	3888	AGAAGGAAAACGGAAGTGATACAAACAAATAAAGAAGCATTCCTGCGTAAATACTGCTGT	GENCODE	-	Nucleus		ASMM10AP1B114223229V4	113630149	113605067	protein_coding	31.2381	111.187	5.08583	6.57464	38.1642	40.5245	23.289	20.5447	33.668	127.672	121.748	109.495	91.5918	105.427	5.34532	5.33525	4.78064	4.6443	5.32366	7.08111	7.09264	6.31843	5.9838	6.39723
ENSMUST00000186583	3.12846e-06	0.000488859	2.80636	down	Yes	chr3	ASH1 like histone lysine methyltransferase [Source:MGI Symbol;Acc:MGI:2183158]	ENSMUSG00000028053	Ash1l	Yes	chr3:88950622-89079375:+		11644	TCGGCGCTCTCGGCCTCGCACGGTGAGTAGGAAAGAGATGCTGGTTGCAAGTTTTGGAAA	GENCODE	+	Nucleus	Yes	ASMM10AP1B116654377V4	89079375	88950622	protein_coding	10.4527	36.4872	3.5023	4.991	9.74062	11.1983	10.7483	9.02919	11.5472	31.5884	31.5458	36.2569	46.9545	36.0905	3.29111	3.41223	3.59316	3.46863	3.74638	5.18071	5.23647	4.70533	5.03726	4.79524
ENSMUST00000036210	0.000558931	0.00695854	2.80604	down	Yes	chr16	protein O-glucosyltransferase 1 [Source:MGI Symbol;Acc:MGI:2444232]	ENSMUSG00000034064	Poglut1		chr16:38525137-38550258:-	NM_001300827	2758	GGGCCGCCAGAAGGACTCAGGCTCAAAATGGAAAGTATTTCTTGACCAAATTAACAGGGC	GENCODE	-	Nucleus		ASMM10AP1B113567722V4	38550258	38525137	protein_coding	5.55738	18.3914	2.53683	4.02537	6.56465	5	5	6.22224	5	19.7968	19.6021	14.6814	19.0459	18.8311	2.72017	2.33065	2.33871	2.95004	2.34458	4.54497	4.61443	3.39773	3.74297	3.82674
ENSMUST00000180611	0.000121069	0.00323377	2.80597	down	Yes	chr18	Dmx-like 1 [Source:MGI Symbol;Acc:MGI:2443926]	ENSMUSG00000037416	Dmxl1	Yes	chr18:49832670-49964254:+	NM_001081371	11319	ACAGGATCTGCAGAAGGCAATATAAAGATTTGGAGTCTTTCGTCCTTTAGTCTTCTCCAT	GENCODE	+			ASMM10AP1B111199385V4	49964254	49832670	protein_coding	83.0075	309.036	6.54771	8.03621	104.403	91.2781	57.1835	72.4552	89.718	311.44	354.077	293.377	288.192	298.094	6.84028	6.54708	6.18966	6.45387	6.70767	8.34441	8.57303	7.69748	7.62657	7.93957
ENSMUST00000021370	0.000663787	0.00762784	2.8047	down	Yes	chr12	L-2-hydroxyglutarate dehydrogenase [Source:MGI Symbol;Acc:MGI:2384968]	ENSMUSG00000020988	L2hgdh		chr12:69690433-69724873:-	NM_145443	3340	TAGCTAAAGAAAACTCTTCAAGAAGTAAAGATGGCATGAACTATCCAATCGCTGTCAAGA	GENCODE	-			ASMM10AP1B109219803V4	69724873	69690433	protein_coding	38.82	139.572	5.4162	6.90405	48.5746	41.589	24.1774	33.981	45.778	145.938	161.441	121.064	117.61	151.805	5.71249	5.37335	4.83999	5.38757	5.76762	7.2742	7.48442	6.4646	6.34221	6.95482
ENSMUST00000114158	0.0208063	0.0628171	2.8038	down	Yes	chr5	collapsin response mediator protein 1 [Source:MGI Symbol;Acc:MGI:107793]	ENSMUSG00000029121	Crmp1		chr5:37242080-37292133:+	NM_001136058	3051	AACTGACTTGTTGGTGGCTCTTATTTCTGAATTCAAAGCTTGTGAAAAAAAATAAAGAAA	GENCODE	+			ASMM10AP1B119871767V4	37292133	37242080	protein_coding	34.6341	109.74	4.94302	6.43041	21.1438	21.5122	13.7851	86.4544	30.2752	64.298	53.4877	184.97	137.175	108.768	4.46985	4.38844	3.98194	6.70735	5.16752	6.12954	5.9438	7.06574	6.57028	6.44268
ENSMUST00000074963	0.0100752	0.0387931	2.80135	down	Yes	chr2	Bardet-Biedl syndrome 5 (human) [Source:MGI Symbol;Acc:MGI:1919819]	ENSMUSG00000063145	Bbs5		chr2:69647208-69667571:+	NM_028284	1468	CGCAGTGCACAGAGCATATGAAACTTCTAAAATGTACCGTGACTTTAAGTTGAGAAGTGC	GENCODE	+	Nucleus		ASMM10AP1B118666870V4	69667571	69647208	protein_coding	48.1444	155.938	5.57663	7.06275	45.9905	36.2838	17.1044	63.6551	77.6884	188.953	152.307	166.344	135.174	136.915	5.62687	5.17307	4.30578	6.27396	6.50347	7.63853	7.40966	6.92426	6.54644	6.79485
ENSMUST00000074694	0.000119687	0.0032225	2.79953	down	Yes	chr5	guanine nucleotide binding protein (G protein), alpha inhibiting 1 [Source:MGI Symbol;Acc:MGI:95771]	ENSMUSG00000057614	Gnai1		chr5:18265135-18360355:-	NM_010305	3135	CTGAACTCTAGTCTGTGTAACTGTGCTACTAATACATCCCAATAAATCTAAATTTTTAAA	GENCODE	-			ASMM10AP1B100015896V4	18360355	18265135	protein_coding	205.003	780.956	7.85396	9.33914	191.119	196.653	125.491	264.858	246.893	864.354	652.203	919.067	832.902	636.254	7.76359	7.62537	7.40051	8.34369	8.13662	9.78333	9.42867	9.29487	9.13496	9.05387
ENSMUST00000185665	3.28616e-05	0.00175354	2.79919	down	Yes	chr12	regulator of G-protein signaling 6 [Source:MGI Symbol;Acc:MGI:1354730]	ENSMUSG00000021219	Rgs6		chr12:82616945-83158240:+	NM_001310478	2201	TTTGGTTGCTAAGTGTGAGAGAAGACACTCAGGATGGCTCAGGGGTCCGGGGACCAGCGA	GENCODE	+		Yes	ASMM10AP1B122335893V4	83158240	82616945	protein_coding	17.8578	63.9433	4.30223	5.78724	20.1745	15.8013	18.296	14.9801	20.0372	62.3022	63.2272	68.1946	66.9824	59.0102	4.40011	3.93063	4.41532	4.19901	4.56606	6.08658	6.16947	5.62026	5.54157	5.5183
ENSMUST00000051477	0.00291618	0.0178603	2.79877	down	Yes	chr4	cell division cycle 42 [Source:MGI Symbol;Acc:MGI:106211]	ENSMUSG00000006699	Cdc42	Yes	chr4:137319696-137357720:-	NM_009861	2108	TGTGTCTCAACTCTTTGTATATGAATTCTTTTCAGATGTATTAAACAAACAAAACCCTTC	GENCODE	-			ASMM10AP1B100000452V4	137357720	137319696	protein_coding	10561	29638.4	13.2336	14.7183	6348.91	6069.3	3309.68	19909	17168.2	24542.8	22157.6	40900.7	39417	21173.9	12.8949	12.7705	12.4151	14.1408	13.9465	14.8381	14.7354	14.8381	14.7948	14.3853
ENSMUST00000212175	0.000318254	0.00526331	2.79571	down	Yes	chr8	CDKN2A interacting protein [Source:MGI Symbol;Acc:MGI:1918175]	ENSMUSG00000038069	Cdkn2aip		chr8:47709445-47713931:-	NM_172407	3393	CTGGTTGCCAAGGTGAAGAAAAGAGGGATATCAAGTAGCAATGAAGGGGTAGAGGAGCCA	GENCODE	-			ASMM10AP1B107990995V4	47713931	47709445	protein_coding	9.07028	30.2863	3.24342	4.72664	11.5864	12.1838	7.44986	5.39934	8.73205	34.8734	26.646	34.4612	30.1266	25.3243	3.55627	3.53996	3.01512	2.77138	3.33439	5.31364	5.01401	4.62904	4.40515	4.27135
ENSMUST00000060396	0.000719265	0.00788597	2.79437	down	Yes	chr18	solute carrier family 25, member 46 [Source:MGI Symbol;Acc:MGI:1914703]	ENSMUSG00000024259	Slc25a46		chr18:31580168-31609902:-	NM_001357461	4371	CGGCCGGGACCGAGCAGCGAACAGTTGAATAGATTTGCTGGATTTGGTATTGGACTTGCA	GENCODE	-	Nucleus		ASMM10AP1B114123534V4	31609902	31580168	protein_coding	73.499	260.749	6.31278	7.7953	101.342	60.6176	39.6703	72.3913	93.4742	278.51	256.325	292.946	253.463	222.498	6.79751	5.94278	5.61017	6.4523	6.76115	8.18292	8.1329	7.69506	7.44327	7.52237
ENSMUST00000043082	0.000131188	0.00335905	2.79278	down	Yes	chr12	patatin-like phospholipase domain containing 8 [Source:MGI Symbol;Acc:MGI:1914702]	ENSMUSG00000036257	Pnpla8	Yes	chr12:44269148-44322532:+	NM_026164	13507	TTATGAAAAGTTAATCAAGGTGTATATCCTTTGCTTACTACACATAACTAACAGTGCTGC	GENCODE	+	Nucleus		ASMM10AP1B105565606V4	44322532	44269148	protein_coding	117.633	433.611	7.0201	8.5018	122.625	126.313	64.2834	122.569	152.373	461.18	378.007	508.616	465.55	354.705	7.08454	7.00578	6.37319	7.20609	7.4309	8.88611	8.66358	8.46251	8.30382	8.19298
ENSMUST00000030839	2.2709e-06	0.000441505	2.78914	down	Yes	chr4	catenin beta interacting protein 1 [Source:MGI Symbol;Acc:MGI:1915756]	ENSMUSG00000028988	Ctnnbip1		chr4:149518236-149566437:+	NM_023465	2674	CCCCTTAGAGTTGAGCATCTGTTTGCCTGAAGTGAATTTCCAGAAGCAGGTGTCCCCAGA	GENCODE	+		Yes	ASMM10AP1B119089280V4	149566437	149518236	protein_coding	21.3061	76.8783	4.5596	6.03942	21.865	22.6193	16.6138	22.7429	22.6894	65.4785	63.2727	98.412	83.8866	73.3419	4.52273	4.46587	4.26102	4.79925	4.74912	6.15724	6.17063	6.16335	5.86082	5.84506
ENSMUST00000122053	0.000452043	0.00625157	2.78803	down	No	chr8	calcium channel, voltage-dependent, P/Q type, alpha 1A subunit [Source:MGI Symbol;Acc:MGI:109482]	ENSMUSG00000034656	Cacna1a		chr8:84415377-84640063:+	NM_001252059	7589	CCTCACGGTCAACCGCTCCCTGTTCCTCTTCAGTGAAGACAACGTGGATGACACGGAACC	GENCODE	+			ASMM10AP1B129603178V4	84640063	84415377	protein_coding	119.052	465.182	7.06061	8.53986	103.84	168.822	142.417	86.9196	93.2632	257.012	507.916	608.243	603.04	349.701	6.83231	7.40466	7.5952	6.71405	6.75683	8.07913	9.07046	8.70772	8.67195	8.17003
ENSMUST00000118886	0.00339583	0.0196669	2.78703	down	Yes	chr9	SNF related kinase [Source:MGI Symbol;Acc:MGI:108104]	ENSMUSG00000038145	Snrk	Yes	chr9:122117300-122169702:+	NM_001357774	4811	ACAGAGTGATTTGGTATGCTGTTTGCAAGGTATCCATTATGATGTTGACAATGAAGGCCT	GENCODE	+	Nucleus		ASMM10AP1B103998815V4	122169702	122117300	protein_coding	159.338	547.886	7.34136	8.82009	131.782	131.92	59.4298	194.572	278.988	480.526	398.585	662.874	675.3	522.143	7.18687	7.05984	6.24732	7.89183	8.32094	8.94454	8.73718	8.82993	8.83859	8.75019
ENSMUST00000114037	9.91284e-05	0.00290267	2.78543	down	Yes	chr16	Son DNA binding protein [Source:MGI Symbol;Acc:MGI:98353]	ENSMUSG00000022961	Son	Yes	chr16:91647879-91679195:+	NM_178880	8399	TGGGGCCCAAGCCTGGATTAAAAAGGATCAGTTCTTAAGAGCAGCCCCAGTGACTGGAGG	GENCODE	+	Nucleus	Yes	ASMM10AP1B122766602V4	91679195	91647879	protein_coding	133.881	506.371	7.24985	8.72776	165.25	159.037	111.401	102.502	131.218	554.731	478.326	509.983	416.239	572.577	7.54125	7.32321	7.21015	6.94303	7.23163	9.14894	8.98769	8.46555	8.14968	8.88691
ENSMUST00000205256	0.000523039	0.00668594	2.7832	down	No	chr6	ethanolamine kinase 1 [Source:MGI Symbol;Acc:MGI:1922570]	ENSMUSG00000030275	Etnk1		chr6:143167254-143232307:+		2647	AGTCGAGACTCTCTTCATTCAAGTCAATCAGTTTGCGTTGGAGCAATTGTGCCTTGGCCA	GENCODE	+	Nucleus		ASMM10AP1B115103453V4	143232307	143167254	protein_coding	6.65857	22.0744	2.80395	4.28069	7.51525	7.33441	5	5.21896	8.22421	25.2579	21.2933	21.7738	24.2201	17.8268	2.9056	2.79245	2.33871	2.73047	3.2525	4.87804	4.72016	3.96997	4.0876	3.74768
ENSMUST00000023814	0.00117496	0.0104588	2.78313	down	Yes	chr15	neuropeptide FF-amide peptide precursor [Source:MGI Symbol;Acc:MGI:1891708]	ENSMUSG00000023052	Npff		chr15:102523839-102524621:-	NM_018787	446	ACCAAGTCTTTGCAGGAGAAGATAAGGGACCCCACCCACCACAGTATGCCCACATTCCAG	GENCODE	-			ASMM10AP1B107648951V4	102524621	102523839	protein_coding	119.885	475.255	7.09903	8.57574	114.028	151.496	124.44	96.3863	113.073	419.233	701.94	425.109	551.784	278.21	6.97416	7.25304	7.3882	6.85592	7.02385	8.74877	9.53257	8.19864	8.55189	7.84686
ENSMUST00000019962	0.000258705	0.00472632	2.78201	down	Yes	chr10	CD164 antigen [Source:MGI Symbol;Acc:MGI:1859568]	ENSMUSG00000019818	Cd164		chr10:41519414-41531048:+	NM_016898	2922	ATTTAAAATATTCTGCATGAATCCGTGTGGCTGTCGTCTTTGTTTACCATGGCTGCTGCT	GENCODE	+	Nucleus		ASMM10AP1B110820463V4	41531048	41519414	protein_coding	104.221	391.835	6.88404	8.36017	131.435	109.022	78.1095	88.005	114.532	429.769	464.393	371.945	333.689	359.379	7.18305	6.79488	6.66736	6.73258	7.04234	8.78728	8.94826	8.01604	7.83945	8.20982
ENSMUST00000022264	0.00184863	0.0137807	2.77864	down	Yes	chr14	protein tyrosine phosphatase, receptor type, G [Source:MGI Symbol;Acc:MGI:97814]	ENSMUSG00000021745	Ptprg	Yes	chr14:11553532-12242041:+	NM_008981	9213	TTTCACAGTAGCTATGTGGACAGTGTGTGTTATTTCTATGTTGACTCTCTGAAGTAGCAA	GENCODE	+			ASMM10AP1B105232259V4	12242041	11553532	protein_coding	48.7673	165.854	5.68081	7.15519	51.8909	38.4721	23.0434	64.3752	66.0549	161.35	163.962	179.57	178.315	146.075	5.81171	5.25701	4.76409	6.28892	6.2823	7.40892	7.50944	7.02406	6.93762	6.89589
ENSMUST00000036172	0.00276167	0.0172553	2.77668	down	Yes	chr1	sphingosine-1-phosphate phosphotase 2 [Source:MGI Symbol;Acc:MGI:3589109]	ENSMUSG00000032908	Sgpp2		chr1:78310345-78420289:+	NM_001004173	4002	CAGGTTTCTATTTTGGAAGCTTTCAACTGTCTTGCTTATGCAGTGTATGTAAATTTATTC	GENCODE	+			ASMM10AP1B100021680V4	78420289	78310345	protein_coding	8.42194	26.7097	3.05703	4.53039	5	13.8001	5	9.97719	8.33245	26.81	18.9737	38.3026	27.5372	21.9251	2.33259	3.73276	2.33871	3.61129	3.26981	4.96093	4.57101	4.78792	4.27503	4.05708
ENSMUST00000170908	0.00048721	0.00652526	2.77535	down	Yes	chr2	DTW domain containing 1 [Source:MGI Symbol;Acc:MGI:1916435]	ENSMUSG00000023330	Dtwd1		chr2:126152141-126165276:+	NM_026981	1342	GGTACGGACCGAGAGTTGAGCGTGGTGCAGTGTACCTATGATACATGCTTTAGAAACAGA	GENCODE	+			ASMM10AP1B105278077V4	126165276	126152141	protein_coding	12.3358	42.8448	3.73133	5.204	11.6716	10.9998	9.82821	13.2439	15.9353	36.1147	50.4521	45.5595	49.1504	32.9473	3.56661	3.38789	3.44696	4.02391	4.2313	5.3605	5.86948	5.03402	5.09414	4.66188
ENSMUST00000170102	0.000106527	0.00303533	2.77111	down	Yes	chr4	leucine zipper protein 1 [Source:MGI Symbol;Acc:MGI:107629]	ENSMUSG00000001089	Luzp1	Yes	chr4:136469761-136549315:+	NM_024452	7526	ACTTCCCCACTCCATGCTCAGGGCCCATCTCCCAGACTGATAATGGTCTTCAGTTGCCAA	GENCODE	+	Nucleus		ASMM10AP1B109917769V4	136549315	136469761	protein_coding	1598.6	6540.82	10.8481	12.3185	1376.56	1382.26	1056.41	1749.25	2428.49	3848.85	5559	9094.47	10057.5	4144.24	10.6912	10.6688	10.7104	10.8846	11.2853	11.9248	12.5476	12.5351	12.7077	11.8774
ENSMUST00000062355	8.41487e-06	0.000827628	2.77003	down	Yes	chr2	RIKEN cDNA 4930470P17 gene [Source:MGI Symbol;Acc:MGI:1914887]	ENSMUSG00000043583	4930470P17Rik		chr2:170579418-170602017:-	NR_027825	1395	GCCTATTGATTTCCTGGATAATAAATAATTGAAGTAAAATCACTGACCCATCTGCCACTT	GENCODE	-			ASMM10AP1B100040149V4	170602017	170579418	protein_coding	5.8069	18.9869	2.55161	4.02151	5.74332	7.95011	5.34106	5	5	10.814	13.7819	28.5426	22.0867	19.7092	2.57415	2.90177	2.57851	2.35905	2.34458	3.73932	4.16236	4.35081	3.95716	3.89789
ENSMUST00000041968	0.000516411	0.00665457	2.76896	down	Yes	chr7	transmembrane protein 135 [Source:MGI Symbol;Acc:MGI:1920009]	ENSMUSG00000039428	Tmem135	Yes	chr7:89139714-89338787:-	NM_028343	3700	TCTTGCTGGTCAAAAAGGTGCATTTCTGTGAGAGATATTTTTAACGAATTACACTCGTGT	GENCODE	-	Nucleus		ASMM10AP1B106428837V4	89338787	89139714	protein_coding	45.8602	164.755	5.66642	7.13577	54.5597	47.9485	28.6359	43.3898	54.767	209.931	158.44	167.758	147.867	139.779	5.8823	5.58954	5.10614	5.7321	6.02202	7.78911	7.45958	6.9344	6.67177	6.82396
ENSMUST00000050248	0.00100887	0.00956249	2.7675	down	Yes	chr16	zinc finger and BTB domain containing 11 [Source:MGI Symbol;Acc:MGI:2443876]	ENSMUSG00000022601	Zbtb11		chr16:55973883-56008913:+	NM_173026	4920	ACCAAGCGGAGTCTTCAGGAACATATGAGTATTCACACAGGAGAGTCCAAGTACTTCTGC	GENCODE	+	Nucleus	Yes	ASMM10AP1B108452128V4	56008913	55973883	protein_coding	8.5838	27.9382	3.14233	4.61091	13.4456	10.0191	6.34099	6.88216	6.23109	34.6949	26.3685	27.0349	24.9545	26.638	3.77551	3.24617	2.77009	3.09138	2.82849	5.3076	4.99848	4.27535	4.13122	4.34189
ENSMUST00000015049	8.07173e-05	0.00263383	2.76699	down	Yes	chr12	DnaJ heat shock protein family (Hsp40) member B9 [Source:MGI Symbol;Acc:MGI:1351618]	ENSMUSG00000014905	Dnajb9		chr12:44205559-44210326:-	NM_013760	2461	AAGCCCTGATGCTGAAGCAAAATTCAGAGAGATTGCAGAAGCGTATGAAACACTCTCGGA	GENCODE	-	Nucleus		ASMM10AP1B101120462V4	44210326	44205559	protein_coding	37.2877	134.166	5.38639	6.85471	39.6822	40.1787	27.6545	36.1447	42.7785	147.443	136.716	137.064	131.814	117.795	5.40905	5.32406	5.05483	5.47592	5.6681	7.28922	7.26043	6.64991	6.5104	6.56359
ENSMUST00000025430	1.0696e-05	0.000989164	2.76426	down	Yes	chr18	SET binding protein 1 [Source:MGI Symbol;Acc:MGI:1933199]	ENSMUSG00000024548	Setbp1		chr18:78750380-79109391:-	NM_053099	9953	TTCAGTCTCTTTTGCTACCAGATCAGGTTAGCACAGTACAGAGCACTTAACTATTAAAAT	GENCODE	-	Nucleus	Yes	ASMM10AP1B100010809V4	79109391	78750380	protein_coding	228.249	878.357	8.03253	9.49943	230.559	278.284	159.45	255.697	217.253	861.737	795.83	1147.55	898.499	688.166	8.04926	8.1113	7.7705	8.29248	7.93912	9.77873	9.71218	9.59314	9.24435	9.16874
ENSMUST00000026624	0.000384783	0.00575969	2.7638	down	Yes	chr14	transmembrane 9 superfamily member 2 [Source:MGI Symbol;Acc:MGI:1915309]	ENSMUSG00000025544	Tm9sf2	Yes	chr14:122107038-122159604:+	NM_080556	3107	ATTAGTTTTGAGGAAGAGAAAAACATCAGATGGGCGTCTAGGTGGGACTATATTCTGGAG	GENCODE	+	Nucleus		ASMM10AP1B110933512V4	122159604	122107038	protein_coding	150.153	558.383	7.39661	8.86326	173.387	157.36	88.0492	155.15	176.819	661.532	567.704	543.765	465.826	553.09	7.6194	7.30792	6.85444	7.55566	7.64561	9.39222	9.23069	8.55585	8.30649	8.83103
ENSMUST00000170552	0.0014484	0.011965	2.76359	down	Yes	chr3	suppressor of Ty 20 [Source:MGI Symbol;Acc:MGI:1929651]	ENSMUSG00000027751	Supt20		chr3:54693105-54716837:+	NM_019995	1968	ACCCGAGGTTAAGCAGAAATTAAGAAGAAATGTGAACTTGTTAGAGAAGCTTGTTATGCA	GENCODE	+	Nucleus	Yes	ASMM10AP1B111823498V4	54716837	54693105	protein_coding	9.67531	33.1516	3.3589	4.82544	9.41397	10.9942	6.77163	11.5347	9.66216	35.8004	36.3804	27.0985	43.2517	23.227	3.23954	3.38706	2.862	3.82087	3.48503	5.34874	5.43243	4.27809	4.92436	4.1436
ENSMUST00000086325	0.0454815	0.107121	2.76334	down	No	chr17	FLYWCH-type zinc finger 1 [Source:MGI Symbol;Acc:MGI:2442638]	ENSMUSG00000040097	Flywch1		chr17:23755420-23771522:-	NM_153791	2443	TTAGAGCTGGTTGTCTCTTGAAAAATTTAATGAAAAATATAGACTACCACAAAAGAATGC	GENCODE	-	Cytoplasm		ASMM10AP1B100090991V4	23771522	23755420	protein_coding	50.3089	144.893	5.3917	6.85811	29.247	23.6186	13.4414	103.988	81.2497	136.524	61.9162	178.879	215.658	131.486	4.95032	4.53224	3.94377	6.96783	6.56433	7.17946	6.14026	7.01951	7.21727	6.73405
ENSMUST00000090791	0.000679265	0.00767936	2.76308	down	Yes	chr3	regulation of nuclear pre-mRNA domain containing 2 [Source:MGI Symbol;Acc:MGI:1922387]	ENSMUSG00000028106	Rprd2	Yes	chr3:95760341-95818758:-	NM_001081293	7756	GTACCCAGAAGACATGATTGTGGCATTGAGAGAAGCTTTAATGGACAGAGCAGCTTCCCA	GENCODE	-	Exosome		ASMM10AP1B113418764V4	95818758	95760341	protein_coding	38.5782	134.211	5.3861	6.85238	33.0397	39.2861	22.766	50.4094	47.3896	149.075	128.896	140.034	137.635	115.418	5.13324	5.28971	4.74611	5.94359	5.81787	7.30496	7.17242	6.67913	6.57356	6.53185
ENSMUST00000072600	0.00105925	0.00979074	2.76032	down	Yes	chr3	gap junction protein, alpha 5 [Source:MGI Symbol;Acc:MGI:95716]	ENSMUSG00000057123	Gja5		chr3:97032416-97053634:+	NM_008121	3109	AGAGAAAGAGGAAATACTATGTTTGACTGGTTTTAAATAAAATCTATCTCTACATGCCAA	GENCODE	+			ASMM10AP1B100015736V4	97053634	97032416	protein_coding	197.928	719.592	7.73788	9.20272	174.335	146.898	104.486	314.351	249.569	647.944	576.081	813.522	982.045	578.365	7.62564	7.21145	7.11372	8.58237	8.15624	9.35896	9.25652	9.11738	9.37498	8.90576
ENSMUST00000088095	0.00168244	0.0129933	2.7603	down	Yes	chr2	nuclear receptor coactivator 3 [Source:MGI Symbol;Acc:MGI:1276535]	ENSMUSG00000027678	Ncoa3	Yes	chr2:165992637-166073242:+	NM_008679	7531	TTGGAAAACTGTAGCCCACTCATCATTTTAGGATCGATGTCTGTTACTAGGACCTGAGCC	GENCODE	+	Nucleus	Yes	ASMM10AP1B115853810V4	166073242	165992637	protein_coding	17.7549	58.6957	4.19688	5.6617	20.6487	23.0692	7.92314	19.7683	17.3651	64.984	50.8675	66.278	60.5307	50.8186	4.43346	4.49763	3.10686	4.59	4.35643	6.14531	5.88084	5.57905	5.39713	5.30618
ENSMUST00000029414	0.000247646	0.00462808	2.75801	down	Yes	chr3	signal sequence receptor, gamma [Source:MGI Symbol;Acc:MGI:1914687]	ENSMUSG00000027828	Ssr3		chr3:65379655-65392623:-	NM_026155	2957	ACGAGGAGAAAATAACTTGTTTCCTACATCTGTCAGAGGTCATGGTAACCTGGACTGAGC	GENCODE	-	Nucleus		ASMM10AP1B107803253V4	65392623	65379655	protein_coding	155.476	576.808	7.4506	8.91422	162.503	168.254	95.3869	171.897	179.342	618.749	666.227	549.82	561.466	487.778	7.5162	7.39914	6.97206	7.69846	7.66712	9.30566	9.46401	8.57125	8.57623	8.65397
ENSMUST00000007747	0.00135727	0.011502	2.75694	down	Yes	chr17	dihydrouridine synthase 3-like (S. cerevisiae) [Source:MGI Symbol;Acc:MGI:2147092]	ENSMUSG00000007603	Dus3l		chr17:56764778-56769841:+	NM_144858	2025	GGGCGTGAATGAGGTGTTGGACGTCCCACTGACTGTGAAGATGCGCACAGGTGTCCAGGA	GENCODE	+		Yes	ASMM10AP1B112346698V4	56769841	56764778	protein_coding	7.65487	24.2076	2.94765	4.41072	7.7816	7.91132	6.22864	11.3528	5	27.0031	19.7663	29.7224	20.2233	24.3232	2.95764	2.89356	2.74692	3.79557	2.34458	4.97061	4.62504	4.4138	3.83312	4.21102
ENSMUST00000037687	0.00832553	0.0345588	2.75421	down	Yes	chrX	transmembrane protein 35A [Source:MGI Symbol;Acc:MGI:1914814]	ENSMUSG00000033578	Tmem35a		chrX:134295225-134305969:+	NM_026239	1918	GCCATTGTTCTTGGTAATTGATACTTGTCTTCTTTTGCTCATTCTTTCAAAATAAAGATT	GENCODE	+			ASMM10AP1B100140859V4	134305969	134295225	protein_coding	944.813	2959.75	9.78843	11.2501	617.417	571.727	355.496	2276.46	902.97	3564.76	2507.14	3109.6	3392.03	2225.21	9.49611	9.27118	9.00488	11.2186	9.95136	11.8057	11.361	11.0128	11.1372	10.9336
ENSMUST00000085513	0.000877664	0.00884009	2.75315	down	Yes	chr7	URI1, prefoldin-like chaperone [Source:MGI Symbol;Acc:MGI:1342294]	ENSMUSG00000030421	Uri1		chr7:37959992-38019542:-	NM_011274	3441	TTTAGGACTTGTTCGCCTCGCTGAGGCTGCGGCGCCGGGCATGGAGCCCCCGTCCGAACC	GENCODE	-		Yes	ASMM10AP1B100256862V4	38019542	37959992	protein_coding	7.43742	23.7665	2.91468	4.37576	8.96623	5	10.3845	5	7.83641	19.1531	21.6349	33.4316	22.7924	21.8207	3.16645	2.33065	3.53708	2.35905	3.18017	4.49882	4.74326	4.5856	4.00158	4.04955
ENSMUST00000084456	0.000490702	0.00654023	2.75219	down	Yes	chr7	olfactory receptor 53 [Source:MGI Symbol;Acc:MGI:1333749]	ENSMUSG00000094819	Olfr53		chr7:140646452-140653085:+	NM_146960	1328	CTGAGGAAAACATCATCACCTTCAAGGGATGTATGGCCCAGCTCTTCTTCCTTGCATGGG	GENCODE	+			ASMM10AP1B109088026V4	140653085	140646452	protein_coding	64.9779	260.653	6.1966	7.65718	83.5324	77.3877	66.6056	44.7066	52.657	107.404	182.251	365.469	388.506	259.633	6.50806	6.31232	6.42367	5.77195	5.96699	6.83657	7.66022	7.99126	8.05295	7.7449
ENSMUST00000109166	0.000627188	0.00737453	2.74938	down	Yes	chr1	axin interactor, dorsalization associated [Source:MGI Symbol;Acc:MGI:1919737]	ENSMUSG00000042901	Aida		chr1:183297049-183325476:+	NM_181732	4279	ACTTTGAAAGCACATGATGGATGGTTGTTACACAGAGCATTAGGACTCATGAGGGGCTTT	GENCODE	+			ASMM10AP1B112113141V4	183325476	183297049	protein_coding	65.3349	229.688	6.15922	7.61833	83.1443	63.4952	35.1478	75.7053	69.1817	208.816	263.504	241.026	203.354	231.742	6.49993	6.01399	5.42062	6.5138	6.34776	7.78017	8.16769	7.43028	7.13014	7.58338
ENSMUST00000009321	2.95637e-05	0.00168705	2.7485	down	Yes	chr16	DGCR8, microprocessor complex subunit [Source:MGI Symbol;Acc:MGI:2151114]	ENSMUSG00000022718	Dgcr8		chr16:18253948-18289246:-	NM_033324	4320	TTTTAGCACCAGAAATACTCTTCCGAGATTGCAGTGAAGATACTGAGTGTTAGTCCGATT	GENCODE	-			ASMM10AP1B102853881V4	18289246	18253948	protein_coding	44.8634	160.766	5.66061	7.11925	47.5713	52.1878	33.9516	46.0017	44.6049	174.905	153.587	157.369	154.754	163.216	5.68032	5.71713	5.36615	5.81318	5.72625	7.52604	7.42127	6.84825	6.73744	7.06325
ENSMUST00000095187	0.000250774	0.00465883	2.74827	down	Yes	chr17	S1 RNA binding domain 1 [Source:MGI Symbol;Acc:MGI:1925836]	ENSMUSG00000024135	Srbd1		chr17:85984665-86145175:-	NM_030133	3530	CCCGAAGCACATTGGAGTTGGAATGTATCAGCATGATGTATCCCAGACATTACTCAAGGC	GENCODE	-			ASMM10AP1B101257929V4	86145175	85984665	protein_coding	7.04351	23.2707	2.8842	4.34273	7.34565	7.32331	5	7.10175	8.44686	21.1795	20.0328	32.8472	23.1527	19.1411	2.87056	2.79101	2.33871	3.1323	3.28843	4.63915	4.64152	4.55658	4.02255	3.85386
ENSMUST00000046305	0.000846018	0.00866223	2.74785	down	Yes	chr12	AT rich interactive domain 4A (RBP1-like) [Source:MGI Symbol;Acc:MGI:2444354]	ENSMUSG00000048118	Arid4a		chr12:71015990-71098592:+	NM_001081195	4998	GCTGCAGCCAAAACTGAAAAGAACGGAGCAGGACAGAGCAGTGACAGCGAGGACCTCCCC	GENCODE	+		Yes	ASMM10AP1B109721910V4	71098592	71015990	protein_coding	9.67334	31.8381	3.34183	4.80013	7.83003	12.8867	6.57749	10.9529	10.1196	38.2641	29.8801	30.171	30.5237	30.3519	2.96749	3.62725	2.82085	3.74136	3.55218	5.43858	5.16917	4.43203	4.42358	4.5373
ENSMUST00000020251	0.000390497	0.00580838	2.74627	down	Yes	chr10	N-acetylglucosamine-1-phosphate transferase, alpha and beta subunits [Source:MGI Symbol;Acc:MGI:3643902]	ENSMUSG00000035311	Gnptab		chr10:88379226-88447329:+	NM_001004164	5390	TCGGAACCGCTTTCTGCACATGCATGAGCTCCAAGAATGGCGGGCATATCGAGACAAGCT	GENCODE	+	Nucleus		ASMM10AP1B101519790V4	88447329	88379226	protein_coding	13.8864	47.1919	3.89621	5.35369	15.0201	17.9672	10.894	9.89934	15.6512	54.6215	49.1012	44.7588	41.845	45.6329	3.94447	4.12032	3.61228	3.60064	4.20337	5.91191	5.8326	5.00472	4.87824	5.14097
ENSMUST00000098941	1.39719e-06	0.00035277	2.74325	down	No	chr3	secretory carrier membrane protein 3 [Source:MGI Symbol;Acc:MGI:1346346]	ENSMUSG00000028049	Scamp3		chr3:89177520-89182763:+	NM_001309910	1338	TCCTTTGTCTGCTGGTACCGCCCGATGTATAAGGCTTTCCGCGGCTGGGTGACTGCTCTG	GENCODE	+			ASMM10AP1B112615232V4	89182763	89177520	protein_coding	24.5787	87.683	4.77985	6.23574	28.2403	22.8774	23.3274	25.1906	23.2581	80.3431	74.2407	104.062	95.5329	84.2361	4.89568	4.48501	4.78378	4.95032	4.78445	6.43492	6.39335	6.25037	6.04681	6.05323
ENSMUST00000043493	0.000984025	0.00940703	2.73969	down	Yes	chr13	interactor of little elongation complex ELL subunit 1 [Source:MGI Symbol;Acc:MGI:2385865]	ENSMUSG00000034525	Ice1		chr13:70588697-70637634:-	NM_144837	7667	AGCACAACAAACAAGCATTTAGGAGAATACTTACTTCGCTCTATTCTCTCAGAGCTAAAG	GENCODE	-	Nucleus		ASMM10AP1B100716904V4	70637634	70588697	protein_coding	30.3066	105.148	5.03433	6.48835	43.6675	37.6215	20.4156	24.0177	25.8105	121.674	112.543	86.8093	87.0264	117.686	5.55061	5.22314	4.58386	4.87737	4.93668	7.01348	6.97821	5.97637	5.91161	6.56206
ENSMUST00000124226	0.00149464	0.0121904	2.73855	down	Yes	chrX	armadillo repeat containing, X-linked 4 [Source:MGI Symbol;Acc:MGI:2147887]	ENSMUSG00000049804	Armcx4		chrX:134686519-134696757:+	NM_001202500	7996	GTGTGGACTTATGTTTATACATTTGAGACTTTATTTTTATGTCACCAATAAAGTTGTGTG	GENCODE	+			ASMM10AP1B100032156V4	134696757	134686519	protein_coding	351.002	1286.87	8.54103	9.99445	272.962	271.08	213.588	687.259	310.121	1086.37	863.606	2039.74	1465.58	979.056	8.29876	8.0739	8.22534	9.63951	8.46765	10.1178	9.82408	10.4022	9.9347	9.69347
ENSMUST00000114025	0.00164755	0.0128305	2.7385	down	Yes	chrX	proline rich Gla (G-carboxyglutamic acid) 1 [Source:MGI Symbol;Acc:MGI:1917364]	ENSMUSG00000047996	Prrg1		chrX:78449613-78583891:-	NM_001289683	3964	TGCTGTCTATAGAATCATCATTCAAGACCTGTCAGAAGCTACAAGCGAAAAATGGGAAGG	GENCODE	-			ASMM10AP1B109724518V4	78583891	78449613	protein_coding	5.5242	17.8373	2.51654	3.96992	5	5.23268	5	5	7.38832	17.7224	23.3827	15.0249	16.9771	16.0794	2.33259	2.46893	2.33871	2.35905	3.08341	4.4017	4.84601	3.42768	3.58502	3.58921
ENSMUST00000092170	0.000187271	0.00393102	2.7378	down	Yes	chr10	transmembrane protein 19 [Source:MGI Symbol;Acc:MGI:1914476]	ENSMUSG00000069520	Tmem19		chr10:115340742-115362267:-	NM_001359472	3012	TCGTTCGGTTGGTGGAAGATGTGCTCGTAGCTCTATTTTCCATGACAGATAGTGACGACA	GENCODE	-			ASMM10AP1B109025528V4	115362267	115340742	protein_coding	5.08311	16.009	2.37372	3.82674	5	5.41555	5	5	5	14.9765	17.2777	18.1429	17.3466	12.3011	2.33259	2.49366	2.33871	2.35905	2.34458	4.17304	4.45423	3.70197	3.61445	3.18999
ENSMUST00000025474	0.00617985	0.0285285	2.73606	down	Yes	chr18	N-ethylmaleimide sensitive fusion protein attachment protein gamma [Source:MGI Symbol;Acc:MGI:104561]	ENSMUSG00000024581	Napg		chr18:62977836-62999450:+	NM_028017	3562	AATTAGATGATTGCTTCTGAAGGAAGATAATTATGAAAATAAAACCCAAGACTCTGTGAA	GENCODE	+	Nucleus		ASMM10AP1B100121631V4	62999450	62977836	protein_coding	976.827	3222.63	9.8812	11.3333	618.725	595.706	353.872	1744.26	1571.57	2920.71	2373.26	3976.9	4550.02	2292.26	9.49828	9.33019	8.99707	10.8801	10.7004	11.5076	11.2698	11.3522	11.5536	10.9833
ENSMUST00000025659	0.00780608	0.0330759	2.73473	down	Yes	chr19	zinc finger, AN1-type domain 5 [Source:MGI Symbol;Acc:MGI:1278334]	ENSMUSG00000024750	Zfand5		chr19:21272278-21282289:+	NM_009551	2834	GTGAGTAGGCACCATTAATATGAAGTGGTCCTAAAATATGAAAAAGGAATGAAATTTAAA	GENCODE	+	Nucleus	Yes	ASMM10AP1B100129941V4	21282289	21272278	protein_coding	21.0364	67.8021	4.38097	5.83237	15.5912	14.4505	10.2639	34.3804	30.496	67.5536	48.7441	85.0135	88.4591	49.24	4.00022	3.80364	3.51808	5.40525	5.17765	6.201	5.82161	5.94562	5.93376	5.25984
ENSMUST00000078369	0.00535751	0.0261552	2.7338	down	Yes	chr13	histone cluster 1, H2ab [Source:MGI Symbol;Acc:MGI:2448306]	ENSMUSG00000061615	Hist1h2ab		chr13:23751126-23751598:+	NM_175660	473	TCTGGCGATTGTCTGTACTGCCCAGTTGAAAGTTAACCAAAACAAAGGCTCTTTTCAGAG	GENCODE	+	Cytoplasm		ASMM10AP1B100084039V4	23751598	23751126	protein_coding	7.69837	25.9194	2.94425	4.39516	5.89177	5	5	13.4414	9.15865	15.3018	13.0366	47.658	27.1817	26.4188	2.59978	2.33065	2.33871	4.04541	3.40671	4.2062	4.08561	5.09983	4.25459	4.32958
ENSMUST00000167549	0.00377743	0.0210249	2.73375	down	Yes	chr9	endonuclease domain containing 1 [Source:MGI Symbol;Acc:MGI:1919196]	ENSMUSG00000037419	Endod1		chr9:14353990-14381242:-	NM_028013	4470	CTGCAAAAGAGTATGGCACGCTTTAAATTTGATCTAAAAGAAATGTTCAGGGCAGGCTCA	GENCODE	-	Nucleus		ASMM10AP1B111225241V4	14381242	14353990	protein_coding	54.6899	179.259	5.81881	7.26969	51.1351	33.9313	28.0663	83.0203	77.2963	178.755	174.098	198.329	179.064	166.049	5.78979	5.07802	5.07835	6.64972	6.49818	7.55897	7.5952	7.16122	6.94488	7.08819
ENSMUST00000159879	0.00112983	0.0102049	2.73277	down	Yes	chr1	TROVE domain family, member 2 [Source:MGI Symbol;Acc:MGI:106652]	ENSMUSG00000018199	Trove2		chr1:143750790-143777068:-	NM_013835	8738	TGTTGCCGCAGCAATGTGCATGGTGGTTACACGGACAGAAAAAGAGTCTTCGGTGGTTGC	GENCODE	-	Nucleus		ASMM10AP1B103539287V4	143777068	143750790	protein_coding	8.04902	26.4418	3.07554	4.52591	11.5162	8.19469	6.75543	5.05689	8.72184	24.6947	34.067	26.4721	25.2071	21.7681	3.54624	2.94788	2.85969	2.69108	3.33284	4.84905	5.34197	4.24509	4.1483	4.04514
ENSMUST00000117786	5.37367e-06	0.000660646	2.73101	down	Yes	chr15	casein kinase 1, epsilon [Source:MGI Symbol;Acc:MGI:1351660]	ENSMUSG00000022433	Csnk1e		chr15:79417856-79441999:-	NM_001359862	2694	GCCCCGGCGCGGTTGAAGCATGGAGTTGCGTGTGGGAAATAAGTATCGCCTGGGCCGAAA	GENCODE	-			ASMM10AP1B123186167V4	79441999	79417856	protein_coding	16.345	57.1155	4.17112	5.62056	17.5987	18.2489	14.8968	14.0275	16.9532	45.395	59.5345	65.9089	63.7089	51.0301	4.18847	4.1436	4.09772	4.10566	4.32016	5.66487	6.08553	5.57022	5.47156	5.3106
ENSMUST00000169156	8.24905e-05	0.0026473	2.73025	down	Yes	chr12	abhydrolase domain containing 12B [Source:MGI Symbol;Acc:MGI:2685650]	ENSMUSG00000090121	Abhd12b		chr12:70154157-70183887:+	NM_001195033	1775	CCCTCCGCTGATGAATATGCTGATATATTTAAATTGCATTACGGCTCCCATTCTCGTGGA	GENCODE	+			ASMM10AP1B101846753V4	70183887	70154157	protein_coding	1136.44	4561.59	10.3445	11.7935	978.534	938.08	778.534	1319.88	1667.19	2617.72	3620.46	7049	6120.28	3400.5	10.173	10.0306	10.2148	10.5213	10.7827	11.3553	11.8985	12.1555	11.9811	11.5772
ENSMUST00000048915	0.00530094	0.0259624	2.73014	down	No	chr3	RNA binding motif protein 8a [Source:MGI Symbol;Acc:MGI:1913129]	ENSMUSG00000038374	Rbm8a		chr3:96629933-96633791:+	NM_025875	2608	TTGTTTTCTATGTTTATTACTTTACTGTTCTGGAAACTGAACAACTACAGTGGGGCATTG	GENCODE	+			ASMM10AP1B118494964V4	96633791	96629933	protein_coding	22.9946	73.4501	4.53516	5.98414	17.1424	29.3673	9.89341	22.5791	35.9908	75.2241	77.5375	70.9059	65.671	77.9117	4.15015	4.8562	3.45875	4.79057	5.42013	6.34116	6.45248	5.679	5.5149	5.93314
ENSMUST00000205931	5.79797e-05	0.00226973	2.72991	down	Yes	chr16	predicted gene, 36028 [Source:MGI Symbol;Acc:MGI:5595187]	ENSMUSG00000108763	Gm36028		chr16:37850913-37861146:-		1161	TAAAAACTTTGCATTAATGAATGTTGGTAATAGCAGTGTCTCCGAGCCCTCTCCCTGAGG	GENCODE	-			ASMM10AP1B105073288V4	37861146	37850913	protein_coding	1754.22	6992.01	11.0021	12.4509	1562.17	1440.68	1325.45	1832.17	2610.64	4325.29	6583.5	8666.63	10530.2	4854.42	10.883	10.7272	11.0822	10.9341	11.3839	12.1	12.7956	12.4592	12.7827	12.1172
ENSMUST00000142407	0.000126893	0.00328428	2.72971	down	Yes	chr5	ubiquitin-conjugating enzyme E2K [Source:MGI Symbol;Acc:MGI:1858216]	ENSMUSG00000029203	Ube2k	Yes	chr5:65537233-65598988:+	NM_016786	4893	AACTGAATTTTTAAAAAATAAACACATTTTTAAAGATGTTGAATTTTCCCCATTATTGGG	GENCODE	+		Yes	ASMM10AP1B121130999V4	65598988	65537233	protein_coding	11.201	39.2221	3.56829	5.01704	7.92399	16.3719	10.821	9.84391	11.044	24.9856	21.9937	64.4249	45.2857	39.4208	2.98593	3.98278	3.60196	3.59106	3.67973	4.86401	4.76768	5.53442	4.98756	4.93154
ENSMUST00000102656	0.00135435	0.0114948	2.72956	down	Yes	chr4	forkhead box O6 [Source:MGI Symbol;Acc:MGI:2676586]	ENSMUSG00000052135	Foxo6		chr4:120267079-120287349:-	NM_194060	2615	CGAGGCCGTGTAGAGTGCATTGTACAGCATATTTTCATGAATAAAATTGTTTTAAATATT	GENCODE	-		Yes	ASMM10AP1B100092211V4	120287349	120267079	protein_coding	255.601	921.655	8.10785	9.55652	296.898	197.561	114.532	350.846	318.169	864.578	768.055	1244.51	1028.6	702.53	8.4168	7.6308	7.25593	8.72968	8.50605	9.78507	9.66079	9.70574	9.42867	9.20232
ENSMUST00000115459	3.60225e-05	0.00181963	2.72955	down	No	chr6	caveolin 2 [Source:MGI Symbol;Acc:MGI:107571]	ENSMUSG00000000058	Cav2		chr6:17281327-17282684:+	NM_001277756	974	GCGGGTATCCTGTTTGCTACCCTCAGCTGTCTGCACATCTGGTGAGAGGGGACACATGGG	GENCODE	+			ASMM10AP1B109113537V4	17282684	17281327	protein_coding	54.1095	198.112	5.94158	7.39025	58.7959	46.2767	47.6324	60.6059	57.2365	159.135	206.754	233.849	235.515	155.307	5.99045	5.53537	5.90234	6.20017	6.07958	7.39035	7.84299	7.38553	7.34152	6.99083
ENSMUST00000044505	0.000500988	0.00659191	2.72423	down	Yes	chr6	phosphodiesterase 1C [Source:MGI Symbol;Acc:MGI:108413]	ENSMUSG00000004347	Pde1c		chr6:56069804-56362392:-	NM_001159953	3907	GAGAGTCTACATTGCTTATAAATGCCTACTATGTTTTACAAGCAGAAAATGAAAGATTAT	GENCODE	-			ASMM10AP1B100085299V4	56362392	56069804	protein_coding	252.345	934.39	8.13638	9.58223	284.186	268.926	145.159	202.224	361.229	1047.78	891.314	866.678	1195.92	670.265	8.35773	8.05751	7.62537	7.95175	8.68952	10.0651	9.87363	9.20232	9.63912	9.13093
ENSMUST00000115685	6.1835e-05	0.00233101	2.72147	down	Yes	chr16	apoptosis-inducing factor, mitochondrion-associated 3 [Source:MGI Symbol;Acc:MGI:1919418]	ENSMUSG00000022763	Aifm3		chr16:17489611-17507485:+	NM_001291070	2357	CCGCCCGCCCGCGGCCACCAAGCCAGGTCCTAAAGCTGTCTAGCTGGCATGGCAGCTCTA	GENCODE	+			ASMM10AP1B128855119V4	17507485	17489611	protein_coding	32.6354	117.196	5.19891	6.6433	27.2186	38.6893	31.8359	33.0759	32.3575	121.806	114.177	127.533	133.956	88.5073	4.84338	5.26538	5.27418	5.34845	5.26315	7.01512	7.00006	6.54214	6.53314	6.12601
ENSMUST00000014321	0.00265484	0.0168395	2.72113	down	Yes	chr11	trans-golgi network vesicle protein 23B [Source:MGI Symbol;Acc:MGI:1914760]	ENSMUSG00000014177	Tvp23b		chr11:62879455-62895185:+	NM_026210	1784	TCGGAAGTGGGGGGCGGGTTGGCGCAGGGTCGTCATGTTGTCGCAGGACAGTAATGATGA	GENCODE	+	Nucleus;Axon		ASMM10AP1B123369753V4	62895185	62879455	protein_coding	20.9314	69.9373	4.46111	5.90531	22.7436	16.987	12.2546	20.4478	32.2241	79.7722	77.5423	64.9151	63.4312	64.0258	4.57692	4.04017	3.79292	4.63721	5.2583	6.42474	6.45273	5.54473	5.46524	5.63912
ENSMUST00000112376	0.0148952	0.0499394	2.72041	down	No	chrX	phosphorylase kinase alpha 2 [Source:MGI Symbol;Acc:MGI:97577]	ENSMUSG00000031295	Phka2		chrX:160502465-160558955:+		2310	GTCAAATTGGGTATGTCATCACTTCCAGACATGAATATTAATAAAATTCACATTGCTTTA	GENCODE	+			ASMM10AP1B100012599V4	160558955	160502465	protein_coding	13.9295	41.6692	3.72293	5.16675	15.0544	9.50638	5	17.3641	22.7228	46.2414	33.4622	44.1154	50.9319	33.5952	3.94758	3.16529	2.33871	4.41079	4.75225	5.69069	5.32004	4.98437	5.14676	4.6919
ENSMUST00000026062	0.00110666	0.0100289	2.71589	down	Yes	chr19	caspase 7 [Source:MGI Symbol;Acc:MGI:109383]	ENSMUSG00000025076	Casp7		chr19:56397129-56442344:+	NM_007611	2350	TCCCACCTAATAAATGGTTGACAGATGTTCCTATTTATTGATTAAAATGTGTTTCAGAAA	GENCODE	+			ASMM10AP1B100019726V4	56442344	56397129	protein_coding	954.964	3383.48	9.98604	11.4275	769.97	723.74	438.949	1632.25	1209.91	2992.21	3296.75	4151.35	4179.28	2297.8	9.8226	9.63996	9.31982	10.7957	10.3521	11.5488	11.7423	11.409	11.4505	10.9867
ENSMUST00000000727	2.83741e-05	0.00164157	2.71466	down	Yes	chr10	RAB5B, member RAS oncogene family [Source:MGI Symbol;Acc:MGI:105938]	ENSMUSG00000000711	Rab5b		chr10:128677175-128696264:-	NM_177411	3180	AACATAACAATCGTGGTAACAGAATGCAACTGCTGATTTATCGATGTATTTAATGTAAGT	GENCODE	-			ASMM10AP1B100008595V4	128696264	128677175	protein_coding	2873.34	10210.3	11.6684	13.1091	2918.59	2610.78	1413.64	3738.67	3685.04	10676.4	8416.7	11892.1	12309.8	7756.55	11.8057	11.6001	11.1937	11.8881	11.8542	13.4777	13.2228	12.9688	13.0313	12.8451
ENSMUST00000076840	0.0030625	0.0183808	2.71463	down	Yes	chr17	ephrin A5 [Source:MGI Symbol;Acc:MGI:107444]	ENSMUSG00000048915	Efna5		chr17:62604184-62881317:-	NM_207654	4032	AAAATTCATTAGAACCAGCAGATGACACCGTACATGAGTCAGCCGAGCCATCCCGCGGTG	GENCODE	-	Nucleus		ASMM10AP1B103290239V4	62881317	62604184	protein_coding	8.16243	24.4531	2.99206	4.43281	13.2737	5	6.84005	5	10.6984	23.1601	23.8809	25.3653	27.9032	21.9559	3.75754	2.33065	2.8782	2.35905	3.63484	4.75621	4.87343	4.17959	4.29549	4.05935
ENSMUST00000167861	9.5682e-05	0.00286062	2.71434	down	Yes	chr19	CUE domain containing 2 [Source:MGI Symbol;Acc:MGI:1914366]	ENSMUSG00000036748	Cuedc2		chr19:46329812-46338660:-	NM_024192	1941	GGCGGCGCCTGACGGAGCAGCTCGTTCAGGCCTGTCTCGTCATGTGACTCACCCTCTCCC	GENCODE	-			ASMM10AP1B123483042V4	46338660	46329812	protein_coding	158.13	606.02	7.4735	8.9141	150.206	138.365	118.756	145.705	237.615	381.426	467.867	757.116	926.586	497.108	7.38929	7.12543	7.31133	7.4672	8.07426	8.62252	8.95805	9.01549	9.29145	8.68299
ENSMUST00000212303	0.00026142	0.00475382	2.71348	down	Yes	chr8	zinc finger, DHHC domain containing 1 [Source:MGI Symbol;Acc:MGI:1918046]	ENSMUSG00000039199	Zdhhc1		chr8:105472423-105496870:-	NM_001357252	2056	TTTCACGTCAGCGAACATTCACTGAGCATCTACTACGTACAAGGAATCAAAGAAGAGTCC	GENCODE	-	Nucleus	Yes	ASMM10AP1B111245616V4	105496870	105472423	protein_coding	9.70761	32.0428	3.36646	4.8066	11.9464	11.0539	6.99288	8.32888	10.216	33.4561	31.4656	38.1182	31.9825	25.1914	3.60174	3.39427	2.91182	3.35853	3.56593	5.25976	5.23336	4.77923	4.49699	4.26367
ENSMUST00000034197	3.63525e-05	0.00183077	2.71109	down	Yes	chr8	ST3 beta-galactoside alpha-2,3-sialyltransferase 2 [Source:MGI Symbol;Acc:MGI:99427]	ENSMUSG00000031749	St3gal2		chr8:110919922-110972480:+	NM_009179	4396	TGCACTACATGTGTGTGATGAGGTGAACGTGTATGGGTTCGGGGCCGACAGTCGAGGCAA	GENCODE	+			ASMM10AP1B115124281V4	110972480	110919922	protein_coding	5.25372	16.7864	2.46159	3.90047	5	5	5	6.26862	5	11.9133	16.3263	18.1013	19.7332	17.8578	2.33259	2.33065	2.33871	2.96142	2.34458	3.87112	4.37924	3.69924	3.80026	3.75247
ENSMUST00000092996	0.000438976	0.00617784	2.71104	down	Yes	chr11	SCO1 cytochrome c oxidase assembly protein [Source:MGI Symbol;Acc:MGI:106362]	ENSMUSG00000069844	Sco1		chr11:67052670-67065572:+	NM_001040026	2412	AGGGACACCAAAGAAGCCATTGCGACTTATGTGAAAGAATTTTCTCCCAAATTGGTTGGT	GENCODE	+			ASMM10AP1B106631555V4	67065572	67052670	protein_coding	44.5031	154.122	5.60066	7.03951	44.229	44.8023	25.2858	58.162	50.0363	151.235	145.747	171.822	182.21	119.594	5.57022	5.48657	4.91062	6.14466	5.89125	7.32378	7.34914	6.96658	6.96998	6.58807
ENSMUST00000180110	0.00149748	0.0121949	2.7101	down	Yes	chr13	ataxin 1 [Source:MGI Symbol;Acc:MGI:104783]	ENSMUSG00000046876	Atxn1	Yes	chr13:45556448-45964977:-	NM_001199305	3901	CCCTCACCAGGGTCATACAGGTCAGTGTCGAAGTCTTGGTAGAGTATCCTTTTTTTGTAT	GENCODE	-		Yes	ASMM10AP1B122041148V4	45964977	45556448	protein_coding	8.0655	25.0088	3.02635	4.46469	11.5472	7.25273	5	5.38086	11.1467	25.9579	20.9997	25.9183	22.9388	29.2291	3.55088	2.77797	2.33871	2.76794	3.69625	4.91725	4.70155	4.21368	4.01083	4.48017
ENSMUST00000043045	0.00548188	0.0265288	2.70992	down	Yes	chrX	WD repeat domain 45 [Source:MGI Symbol;Acc:MGI:1859606]	ENSMUSG00000039382	Wdr45		chrX:7722217-7728206:+	NM_172372	1609	TAGTCTCTGTAATGTATATGAATAAAAGGCCTTTGAGTGGCATTTATGACTTGACCTCAA	GENCODE	+			ASMM10AP1B120970685V4	7728206	7722217	protein_coding	1488.03	4911.77	10.4882	11.9265	947.144	952.24	511.95	2578.18	2450.65	4217.07	3366.24	6260.77	7305.22	3409.56	10.1216	10.0596	9.56173	11.3961	11.302	12.0663	11.7769	11.9883	12.2197	11.5812
ENSMUST00000190997	0.00161028	0.012688	2.7076	down	Yes	chr1	retinoblastoma binding protein 5, histone lysine methyltransferase complex subunit [Source:MGI Symbol;Acc:MGI:1918367]	ENSMUSG00000026439	Rbbp5		chr1:132477367-132504889:+	NM_172517	2856	AGTCCTTGGCAGCAGGAGGAGCCATCTCAGAACTGCTGTGAAGACCGTGGAACCCTTGGT	GENCODE	+		Yes	ASMM10AP1B120062106V4	132504889	132477367	protein_coding	5.78863	17.577	2.51434	3.95135	5.45148	8.49165	5	5	5	22.9176	17.4599	14.2073	14.9968	18.3036	2.52708	3.00227	2.33871	2.35905	2.34458	4.74211	4.46865	3.35147	3.40855	3.78596
ENSMUST00000168937	0.000270324	0.00482887	2.70527	down	Yes	chr9	mitogen-activated protein kinase 6 [Source:MGI Symbol;Acc:MGI:1354946]	ENSMUSG00000042688	Mapk6		chr9:75386902-75409359:-	NM_027418	4089	ACTGGGAAAGGTACCACGATTGTCAGTTCTCGGAGCATGACTGGCCTATTCATAACAACT	GENCODE	-	Nucleus		ASMM10AP1B100848427V4	75409359	75386902	protein_coding	11.6579	38.6832	3.63913	5.07491	12.2385	15.2191	9.24994	8.62726	12.9544	37.5227	42.1747	45.8253	32.8122	35.0808	3.64029	3.87751	3.35054	3.4096	3.9177	5.41242	5.62856	5.04292	4.53407	4.75656
ENSMUST00000091706	0.000162013	0.00371247	2.70518	down	Yes	chr13	hemochromatosis [Source:MGI Symbol;Acc:MGI:109191]	ENSMUSG00000006611	Hfe		chr13:23702034-23710854:-	NM_010424	3572	AGGCACTGCCACCGCGTTCACATTCTCTAAGATACCTCTTCATGGGTGCCTCAGAGCCAG	GENCODE	-			ASMM10AP1B114764468V4	23710854	23702034	protein_coding	30.2358	113.221	5.06902	6.50474	35.8073	27.1255	29.5932	22.0032	36.6499	56.2344	75.8903	139.987	179.296	114.698	5.24909	4.74038	5.16035	4.74825	5.447	5.95025	6.42462	6.67843	6.9467	6.52372
ENSMUST00000025403	0.00108948	0.00993242	2.7051	down	Yes	chr18	inositol (myo)-1(or 4)-monophosphatase 2 [Source:MGI Symbol;Acc:MGI:2149728]	ENSMUSG00000024525	Impa2		chr18:67289253-67319146:+	NM_053261	1661	GTATAAATTAAAATGCTGTATACAGAACCCTTTATCGAAGCCCACGTGTACTGAAAGTGG	GENCODE	+			ASMM10AP1B100027815V4	67319146	67289253	protein_coding	102.605	389.28	6.87097	8.30665	107.453	99.2549	78.8235	124.697	102.795	615.05	322.155	368.595	370.143	270.455	6.88268	6.66339	6.68283	7.23025	6.89569	9.29991	8.44719	8.00182	7.98147	7.80284
ENSMUST00000099461	0.00521252	0.0256559	2.7044	down	Yes	chr2	dual oxidase 1 [Source:MGI Symbol;Acc:MGI:2139422]	ENSMUSG00000033268	Duox1		chr2:122315672-122347972:+	NM_001099297	5267	CCTCAGCCCCATCTCCCTCTTCTAGTGGTCTGTTTTGCAAATAAACGGTGTTTCCCCCTT	GENCODE	+			ASMM10AP1B100038650V4	122347972	122315672	protein_coding	6609.94	24265.4	12.7258	14.1611	4190.14	4404.46	3229.8	10504.5	10720.8	9733.05	13505.9	43815.4	39030.5	15242.3	12.3264	12.355	12.3819	13.2717	13.2938	13.3289	13.9041	14.9209	14.7853	13.8662
ENSMUST00000161523	7.56808e-05	0.00257823	2.7037	down	No	chr1	transmembrane protein 63a [Source:MGI Symbol;Acc:MGI:2384789]	ENSMUSG00000026519	Tmem63a		chr1:180944035-180975103:+		3258	AAAGAGCAACATTGGGAGAGAAGGCACAATGACCAGCTCCCCGTTCCTGGATCCCTGGCC	GENCODE	+			ASMM10AP1B108564317V4	180975103	180944035	protein_coding	110.809	422.238	6.98332	8.41825	100.506	141.189	116.836	89.9951	105.52	250.972	452.935	518.763	562.922	325.599	6.78371	7.15261	7.28688	6.7628	6.93058	8.04645	8.91112	8.49023	8.58013	8.06332
ENSMUST00000102697	0.0021368	0.0147991	2.70322	down	Yes	chr11	folliculin [Source:MGI Symbol;Acc:MGI:2442184]	ENSMUSG00000032633	Flcn		chr11:59791408-59810016:-	NM_146018	3437	AGGGCTGAATGGAAAGCGCGGATGACAACCTCAAGTCTTTGAATTCGAATAGTGCAGCTT	GENCODE	-			ASMM10AP1B102291492V4	59810016	59791408	protein_coding	13.6342	45.5216	3.84818	5.28286	14.9736	11.7866	8.39021	17.6483	15.3724	62.0404	38.2411	38.5137	48.6427	40.1701	3.93863	3.49461	3.19599	4.43326	4.1784	6.08133	5.49869	4.79517	5.08064	4.95847
ENSMUST00000105917	0.000474345	0.00644801	2.70311	down	Yes	chr7	solute carrier family 22 (organic cation transporter), member 18 [Source:MGI Symbol;Acc:MGI:1336884]	ENSMUSG00000000154	Slc22a18		chr7:143475101-143499325:+	NM_001042760	1552	ACCCGAAATACACCCACTCTCTCCCGGAGAAAGCAGGAATACACCCACTCTCTCCCGGAG	GENCODE	+			ASMM10AP1B100186490V4	143499325	143475101	protein_coding	1092.56	4557.75	10.2872	11.7218	890.21	938.82	749.23	1265.17	1619.37	2184.62	3190.31	6542.66	7674.49	3196.67	10.0328	10.0331	10.16	10.468	10.7421	11.0854	11.6941	12.057	12.2902	11.4825
ENSMUST00000085814	0.00236773	0.01566	2.70178	down	Yes	chr12	nuclear receptor coactivator 1 [Source:MGI Symbol;Acc:MGI:1276523]	ENSMUSG00000020647	Ncoa1	Yes	chr12:4247362-4477182:-	NM_010881	7329	ACTTATTCAAAGTTGTCCGTGTAATTGACCTTAAATGAGGTGAGAGCAAACCGACGAGCG	GENCODE	-		Yes	ASMM10AP1B116441403V4	4477182	4247362	protein_coding	25.5379	86.5686	4.76376	6.19768	22.2153	22.4868	15.5442	28.2299	39.2135	108.446	81.5815	89.1679	88.0328	65.6148	4.54439	4.45601	4.15786	5.11665	5.54392	6.84814	6.5214	6.0168	5.9255	5.67655
ENSMUST00000163119	0.000153469	0.00360901	2.69988	down	Yes	chr1	cullin 3 [Source:MGI Symbol;Acc:MGI:1347360]	ENSMUSG00000004364	Cul3	Yes	chr1:80264923-80340480:-	NM_016716	4709	ACACTGGACTAAGAGAAGTTGTTACTGAACATCTCATAAATAAGGTGCGAGAAGATGTAC	GENCODE	-		Yes	ASMM10AP1B118799796V4	80340480	80264923	protein_coding	108.046	388.901	6.91907	8.35196	119.712	108.845	68.8707	103.829	138.971	386.259	432.461	395.417	410.219	320.15	7.04978	6.79191	6.47968	6.96586	7.3081	8.64009	8.84705	8.10292	8.1262	8.04356
ENSMUST00000022226	0.00949293	0.0375299	2.69907	down	Yes	chr13	peptidylprolyl isomerase domain and WD repeat containing 1 [Source:MGI Symbol;Acc:MGI:2443069]	ENSMUSG00000021713	Ppwd1		chr13:104205124-104228822:-	NM_172807	2342	AGTACCAACGCCTTGGCTTGATAATAAGCACACGGTGTTTGGAAGAGTGACTAAAGGCAT	GENCODE	-			ASMM10AP1B101987500V4	104228822	104205124	protein_coding	12.2681	36.1224	3.54042	4.97288	16.6625	19.8508	11.4324	5	8.39466	42.2936	38.7491	32.0185	29.5116	38.0391	4.10692	4.26919	3.68715	2.35905	3.27978	5.57831	5.5149	4.5174	4.37622	4.87757
ENSMUST00000030340	0.001306	0.0112093	2.69813	down	Yes	chr4	sterol carrier protein 2, liver [Source:MGI Symbol;Acc:MGI:98254]	ENSMUSG00000028603	Scp2		chr4:108043839-108118532:-	NM_011327	2640	TATTAAAGTGGTTGGCTATGATATGAGTAAAGAAGCTGCCAGGAGATGCTATGAGAAGTC	GENCODE	-			ASMM10AP1B111805845V4	108118532	108043839	protein_coding	172.688	614.9	7.57365	9.00561	215.085	164.929	87.7047	184.893	210.828	721.491	672.907	561.636	547.327	571.138	7.94601	7.37185	6.84847	7.80819	7.89374	9.53145	9.47604	8.60117	8.53755	8.88183
ENSMUST00000039655	0.000432164	0.00613394	2.6972	down	Yes	chr17	tubby like protein 4 [Source:MGI Symbol;Acc:MGI:1916092]	ENSMUSG00000034377	Tulp4		chr17:6138148-6240628:+	NM_054040	9687	CTAGAAGGGAGTAATGGTTTGCATTCAAAATGATGTAATTTTCCAAATTATTTTGCCTTT	GENCODE	+	Nucleus	Yes	ASMM10AP1B100174370V4	6240628	6138148	protein_coding	2727.09	9368.05	11.5275	12.959	2735.06	2224.15	1104.68	3698.48	3873.07	9906.95	7851.98	11039.6	11575	6466.73	11.7088	11.3451	10.7842	11.8774	11.9221	13.3673	13.0809	12.8413	12.9328	12.5726
ENSMUST00000114694	0.000915656	0.00905903	2.69157	down	Yes	chr16	zinc finger and BTB domain containing 20 [Source:MGI Symbol;Acc:MGI:1929213]	ENSMUSG00000022708	Zbtb20	Yes	chr16:42907652-43642602:+	NM_001285805	26901	ATTTTACAAGGTTTCTGTTTTGTGTGGAAGAGTAATTGATGTTGCTAAGAATGATGTTTG	GENCODE	+	Exosome	Yes	ASMM10AP1B100001774V4	43642602	42907652	protein_coding	1312.02	4679.32	10.4873	11.9157	1299.87	1197.11	552.071	1825.63	1685.43	5638.92	4122.48	5504.35	4663.8	3467.06	10.5978	10.4264	9.68381	10.9288	10.7996	12.5088	12.0923	11.7923	11.5812	11.6039
ENSMUST00000102581	0.00153941	0.0123745	2.69139	down	No	chr5	potassium channel tetramerisation domain containing 10 [Source:MGI Symbol;Acc:MGI:2141207]	ENSMUSG00000001098	Kctd10		chr5:114363567-114380508:-	NM_026145	3103	ACCTTTCTCTTGTATCTGACACAAAACCTATGATAAATACTCAAACAATCCCGACTGGAT	GENCODE	-			ASMM10AP1B109925125V4	114380508	114363567	protein_coding	244.988	865.034	8.0672	9.49555	250.548	227.229	114.531	324.941	307.694	938.295	832.97	856.256	739.478	958.169	8.17302	7.82337	7.25579	8.62906	8.45477	9.89926	9.7711	9.18488	8.95907	9.66346
ENSMUST00000078734	6.50258e-06	0.000715284	2.69035	down	No	chr4	poly(A) binding protein, cytoplasmic 4 [Source:MGI Symbol;Acc:MGI:2385206]	ENSMUSG00000011257	Pabpc4		chr4:123283095-123298832:+	NM_148917	2700	GGCTCCAACTGGCGTCCCTACAGCCGTGCCAAACCTTGCACCTCGGGCCGCAGTTGCTGC	GENCODE	+	Exosome		ASMM10AP1B120633989V4	123298832	123283095	protein_coding	104.815	385.356	6.91721	8.345	121.174	106.249	96.6511	103.124	96.8764	395.959	361.501	416.831	381.222	371.267	7.06838	6.7566	6.99198	6.95435	6.81473	8.67371	8.59985	8.17599	8.02352	8.25194
ENSMUST00000040017	0.00353439	0.0201748	2.6902	down	Yes	chr6	meiosis regulator for oocyte development [Source:MGI Symbol;Acc:MGI:2182066]	ENSMUSG00000042447	Mios		chr6:8209222-8236274:+	NM_145374	3710	CGTTCCTGACGAGTGAAGCGGGGGCATATGATGGAGTGTTGTATGAAAACAAAGTTGCTG	GENCODE	+	Nucleus		ASMM10AP1B116126007V4	8236274	8209222	protein_coding	72.9745	244.376	6.27617	7.70388	90.4732	76.1972	31.2514	69.3323	97.6185	285.56	267.782	230.226	205.651	232.658	6.63172	6.28639	5.24639	6.39065	6.82569	8.22435	8.19348	7.36441	7.14912	7.58804
ENSMUST00000024849	0.00124023	0.0108455	2.68712	down	No	chr17	elastin microfibril interfacer 2 [Source:MGI Symbol;Acc:MGI:2389136]	ENSMUSG00000024053	Emilin2		chr17:71252173-71310961:-		3906	GCCCAGTGCCAGGAACAAAAACTGGTGCGCCTACATCGTGAATAAGAACGTGAGCTGCAC	GENCODE	-			ASMM10AP1B106086685V4	71310961	71252173	protein_coding	16.9384	55.2977	4.15487	5.58093	19.2339	15.6343	9.68433	24.3653	15.7741	54.4996	56.2442	61.8425	51.1184	52.7839	4.3246	3.91463	3.42286	4.89713	4.21516	5.90838	6.01253	5.47191	5.15237	5.35947
ENSMUST00000017288	0.000788885	0.00831662	2.68543	down	Yes	chr2	Rho family GTPase 3 [Source:MGI Symbol;Acc:MGI:1921444]	ENSMUSG00000017144	Rnd3		chr2:51130438-51149111:-	NM_028810	2828	GAAGTCACTTTGTATGTTTGTTTGGTCAGTGTTTCCACAGTATTTATTAAAACGTATGGG	GENCODE	-			ASMM10AP1B100077286V4	51149111	51130438	protein_coding	638.517	2359.98	9.47176	10.8969	598.967	595.464	316.431	808.012	873.708	2303.83	2728.87	2648.44	2545.39	1573.36	9.44416	9.32939	8.82753	9.85285	9.90489	11.1602	11.4699	10.768	10.7004	10.3861
ENSMUST00000033723	0.000289693	0.00500896	2.68375	down	Yes	chrX	synapse associated protein 1 [Source:MGI Symbol;Acc:MGI:1914293]	ENSMUSG00000031357	Syap1		chrX:162857057-162888447:-	NM_025932	2087	AGAGGATGAGCTACTAAGCAAGATGAGATTTGCCCTTGTTCCTAAACTTGTGAAGGAAGA	GENCODE	-	Nucleus		ASMM10AP1B119152944V4	162888447	162857057	protein_coding	151.141	549.092	7.42132	8.84557	188.472	153.549	100.824	145.081	167.78	607.17	617.34	504.231	497.335	519.386	7.74444	7.27431	7.05582	7.45999	7.57205	9.27931	9.35186	8.45143	8.40244	8.74283
ENSMUST00000097275	0.00052201	0.00667789	2.68252	down	Yes	chr17	protein kinase C, epsilon [Source:MGI Symbol;Acc:MGI:97599]	ENSMUSG00000045038	Prkce		chr17:86167785-86657919:+	NM_011104	6254	GTACTGTACTCAAAAGGATGTGAATGTGTATTGTTCCAGAACGTAATAAATATGATGATG	GENCODE	+	Nucleus		ASMM10AP1B100082750V4	86657919	86167785	protein_coding	2914.52	9834.13	11.5966	13.0202	2382.11	2405.09	1185.47	4480.19	4119.72	10727.3	7444.68	11519.2	12691.6	6787.77	11.5038	11.4648	10.909	12.1147	11.9909	13.4849	12.9887	12.913	13.0779	12.6366
ENSMUST00000190166	0.000264626	0.00477297	2.68077	down	No	chr9	branched chain ketoacid dehydrogenase E1, beta polypeptide [Source:MGI Symbol;Acc:MGI:88137]	ENSMUSG00000032263	Bckdhb		chr9:83948781-84124240:+	NM_199195	1398	TTAAAAAATAGGGCAAACTCAGAAGATGAACCTCTTCCAGTCAATAACAAGTGCCCTGGA	GENCODE	+			ASMM10AP1B120934581V4	84124240	83948781	protein_coding	90.9478	326.036	6.68385	8.1065	119.52	107.653	74.3562	70.8482	82.3616	360.128	354.247	315.742	270.601	329.462	7.04598	6.77596	6.59143	6.42106	6.58482	8.54549	8.57346	7.79628	7.53682	8.08046
ENSMUST00000026902	0.00817337	0.0341818	2.67931	down	Yes	chr10	Ras association (RalGDS/AF-6) domain family member 3 [Source:MGI Symbol;Acc:MGI:2179722]	ENSMUSG00000025795	Rassf3		chr10:121410350-121476347:-	NM_138956	3522	AGCATGAAATTGGAGAGTGGGAAGCTTTCAGCCTACCGGAGCTGCAGAACTTCCTGCGCA	GENCODE	-			ASMM10AP1B117372006V4	121476347	121410350	protein_coding	11.3484	35.2478	3.51098	4.93284	19.6559	7.15254	7.05553	13.1579	9.72027	40.0367	42.3837	30.4122	29.1147	34.2917	4.35958	2.76084	2.92545	4.01367	3.49538	5.50397	5.63695	4.44325	4.35726	4.72279
ENSMUST00000100635	0.00565431	0.0269883	2.67885	down	Yes	chr15	family with sequence similarity 84, member B [Source:MGI Symbol;Acc:MGI:3026924]	ENSMUSG00000072568	Fam84b		chr15:60818994-60825080:-	NM_001162926	5565	GGAATTATGCTGTCTGTGTTCACGAAAAGTATCTTATTTTCAATACAACAGTTACAATAC	GENCODE	-			ASMM10AP1B100050162V4	60825080	60818994	protein_coding	109.624	378.436	6.84758	8.2692	100.78	68.8303	65.789	209.727	102.996	400.34	336.975	438.463	497.23	219.171	6.78924	6.1398	6.40506	8.00522	6.8986	8.68866	8.50452	8.24832	8.4019	7.50257
ENSMUST00000053713	0.0037613	0.02097	2.67733	down	Yes	chr7	interferon regulatory factor 2 binding protein 1 [Source:MGI Symbol;Acc:MGI:2442159]	ENSMUSG00000044030	Irf2bp1		chr7:19004044-19006777:+	NM_178757	2734	TGTAGTAGTGTACATTTGCTGTGCTCTAATTAAAGGTGTAGTCGAGGCCGGTTTTGCAGA	GENCODE	+		Yes	ASMM10AP1B100133954V4	19006777	19004044	protein_coding	238.367	810.372	7.97076	9.39156	210.893	188.997	99.1114	352.735	340.099	925.324	715.26	937.451	830.712	643.115	7.91577	7.56888	7.02897	8.73666	8.60353	9.87651	9.55908	9.3251	9.12819	9.06892
ENSMUST00000043356	0.000622611	0.00733619	2.67609	down	Yes	chr11	RIKEN cDNA 0610010F05 gene [Source:MGI Symbol;Acc:MGI:1918925]	ENSMUSG00000042208	0610010F05Rik		chr11:23573251-23629027:-	NM_001347242	4392	AAATGGCAATGACAAAAATTGTGGAGAAAGTCCCTTGATCTGACTTGTTCTGCTGTCTGA	GENCODE	-			ASMM10AP1B104070533V4	23629027	23573251	protein_coding	16.544	54.356	4.1359	5.55603	20.9784	17.0075	9.34529	16.1184	19.2703	49.9515	56.7783	62.2877	51.0026	51.76	4.459	4.04157	3.36787	4.30226	4.50881	5.79382	6.02404	5.48273	5.14864	5.33091
ENSMUST00000055168	0.00266598	0.0168654	2.67519	down	Yes	chr6	potassium voltage-gated channel, shaker-related subfamily, member 1 [Source:MGI Symbol;Acc:MGI:96654]	ENSMUSG00000047976	Kcna1		chr6:126640397-126644796:-	NM_010595	4031	AATAGACCTAAGACAAGCATTCTTTCTAGCTGAACATAAATACAAGCAAAACAAACAAAC	GENCODE	-	Axon		ASMM10AP1B100100318V4	126644796	126640397	protein_coding	7.28578	21.993	2.84714	4.26679	6.52069	12.2656	6.42411	5	6.21852	29.1235	21.3285	19.3201	18.5672	21.626	2.71147	3.5505	2.7887	2.35905	2.82601	5.07014	4.7227	3.79668	3.70869	4.03573
ENSMUST00000046751	0.000870266	0.00877614	2.67491	down	Yes	chr4	zinc finger, MYM-type 6 [Source:MGI Symbol;Acc:MGI:106505]	ENSMUSG00000042408	Zmym6		chr4:127077383-127124370:+	NM_177462	4210	GCGACATTCAGAGGAGGGATACGCGCCTGTAGAGTGTTACAACTGTGGCGTCATCTTAGT	GENCODE	+	Nucleus	Yes	ASMM10AP1B117733994V4	127124370	127077383	protein_coding	6.78878	20.6635	2.76433	4.18382	10.1877	5.48322	5	5	8.27302	21.197	15.9394	23.998	25.1763	17.0068	3.36117	2.50272	2.33871	2.35905	3.26001	4.64028	4.35081	4.10451	4.14721	3.67631
ENSMUST00000099173	0.00062156	0.00732998	2.67316	down	Yes	chr2	eukaryotic translation initiation factor 2, subunit 2 (beta) [Source:MGI Symbol;Acc:MGI:1914454]	ENSMUSG00000074656	Eif2s2		chr2:154871410-154892935:-	NM_026030	2542	TGGAACATAAGGAATGGGGCAGCGACCTGTTTTTAATGTCTAGAAAATGATTTGGAGGGT	GENCODE	-	Exosome;Axon		ASMM10AP1B117116599V4	154892935	154871410	protein_coding	61.9581	214.698	6.10547	7.52402	71.994	61.0862	38.2864	68.4899	69.934	220.554	231.856	191.529	179.977	249.572	6.28422	5.95451	5.55267	6.37476	6.3612	7.86319	8.00135	7.11437	6.95178	7.6894
ENSMUST00000119800	0.00037756	0.00571294	2.67158	down	Yes	chr15	zinc finger protein 740 [Source:MGI Symbol;Acc:MGI:1915994]	ENSMUSG00000046897	Zfp740		chr15:102204609-102215606:+	NM_001289690	3882	AGTCAGCATGGCTCAGGAATTTTATTGAGCTCCTGTTACATGCACGGCATTGTGTTTGGA	GENCODE	+		Yes	ASMM10AP1B122462776V4	102215606	102204609	protein_coding	5.35287	16.447	2.46133	3.87902	5	5	5	5	6.76433	16.2094	16.9819	18.5036	13.9483	16.5918	2.33259	2.33065	2.33871	2.35905	2.94564	4.28537	4.43097	3.73184	3.30665	3.64029
ENSMUST00000052374	0.00117536	0.0104588	2.67101	down	Yes	chr15	RAN GTPase activating protein 1 [Source:MGI Symbol;Acc:MGI:103071]	ENSMUSG00000022391	Rangap1		chr15:81704253-81730003:-	NM_001146174	3033	CGGCCCGGCAAAACCCCGCTCCGGCTTGAACAAATCAAATCGAAGGAAAGAAACTGCCGG	GENCODE	-			ASMM10AP1B113305329V4	81730003	81704253	protein_coding	17.425	56.6142	4.17842	5.5958	12.8809	16.9453	11.0559	17.1584	29.0846	41.2087	53.5671	62.9007	74.6842	50.7102	3.71821	4.03692	3.63691	4.39187	5.1082	5.54341	5.9455	5.49869	5.68996	5.30145
ENSMUST00000044454	6.79284e-05	0.00245305	2.67058	down	Yes	chr9	5-azacytidine induced gene 2 [Source:MGI Symbol;Acc:MGI:1351332]	ENSMUSG00000039285	Azi2		chr9:118040499-118063839:+	NM_013727	3396	GTGGTATGTGAATAAACTATTATAACCTTATACAATGTCCAGTTAAAAGAAGAAAGAGCA	GENCODE	+			ASMM10AP1B106427669V4	118063839	118040499	protein_coding	910.608	3294.13	10.0005	11.4176	840.911	807.986	489.586	1120.07	1294.49	3167.58	2789.37	3815.93	3496.5	3201.26	9.9484	9.81628	9.49199	10.3019	10.4438	11.6318	11.4962	11.2951	11.1809	11.4842
ENSMUST00000105611	0.00084047	0.00864702	2.67049	down	Yes	chr10	opioid receptor, mu 1 [Source:MGI Symbol;Acc:MGI:97441]	ENSMUSG00000000766	Oprm1		chr10:6788809-7038198:+	NM_001304955	2420	AAAAACATGGATTATGTACTTAGTGCCTCTCCATCTCTTGAGAGCAGCTTTACCTGAGCT	GENCODE	+			ASMM10AP1B109116076V4	7038198	6788809	protein_coding	35.9147	141.065	5.34116	6.75826	41.001	38.0656	39.9997	29.25	31.2571	50.2131	88.2721	189.26	217.056	160.526	5.45851	5.24177	5.62076	5.17262	5.21214	5.79839	6.63202	7.09692	7.22513	7.03885
ENSMUST00000209885	0.000511421	0.0066269	2.6701	down	Yes	chr8	transcription factor Dp 1 [Source:MGI Symbol;Acc:MGI:101934]	ENSMUSG00000038482	Tfdp1		chr8:13338751-13378448:+	NM_001291765	2511	CCGACGCTCGGCCCAGGATAAGTACGGTTTCTTCTGTGGAGGGTACGCAGTTAAAGCCTT	GENCODE	+		Yes	ASMM10AP1B102398504V4	13378448	13338751	protein_coding	6.48891	20.753	2.75772	4.17461	5	7.14649	5	8.20054	7.09751	18.9498	16.1518	28.9058	23.6042	16.1535	2.33259	2.75986	2.33871	3.33615	3.02127	4.48608	4.36727	4.37046	4.05203	3.59721
ENSMUST00000027797	0.00139451	0.0116752	2.66928	down	Yes	chr1	nuclear VCP-like [Source:MGI Symbol;Acc:MGI:1914709]	ENSMUSG00000026516	Nvl		chr1:181087138-181144204:-	NM_026171	9392	TCGGAGATCAGACCGAGAAACAGGTGCTAGTGTTCGTGTGGTGAATCAGCTGCTTACAGA	GENCODE	-	Nucleus		ASMM10AP1B112573480V4	181144204	181087138	protein_coding	13.6568	44.5763	3.84619	5.26264	20.2375	16.6944	11.0589	11.0899	9.20307	47.2494	54.7773	40.7501	43.7656	36.339	4.40429	4.01243	3.63747	3.76137	3.41538	5.71834	5.97652	4.87172	4.94069	4.80594
ENSMUST00000018805	0.00173435	0.0132534	2.66872	down	Yes	chr11	component of oligomeric golgi complex 1 [Source:MGI Symbol;Acc:MGI:1333873]	ENSMUSG00000018661	Cog1		chr11:113649169-113662947:+	NM_013581	3935	AGACACGCTGCAGAAATGGATCGACATGTGCAATGAAGACATTAAAAATGGGATCGGCAA	GENCODE	+	Cytoplasm		ASMM10AP1B104336938V4	113662947	113649169	protein_coding	15.6945	52.0283	4.05455	5.4707	20.807	16.3744	9.78619	11.9377	19.5674	62.4531	50.5874	62.4125	46.589	38.0993	4.44552	3.98309	3.44061	3.87112	4.53243	6.0891	5.8729	5.48548	5.02593	4.8801
ENSMUST00000026126	0.000908945	0.00901933	2.66774	down	Yes	chr7	integrator complex subunit 4 [Source:MGI Symbol;Acc:MGI:1917164]	ENSMUSG00000025133	Ints4		chr7:97480956-97541394:+	NM_027256	3240	CAGCAGCAAAACAGATCATGGAGGAAACCTACAAAATGGAGTTTATGTACAGTGGTGTGG	GENCODE	+		Yes	ASMM10AP1B114166211V4	97541394	97480956	protein_coding	58.3207	198.753	6.00095	7.41657	86.5024	59.7678	36.0023	51.0881	58.2429	222.761	218.734	192.527	164.951	194.793	6.55849	5.92145	5.46263	5.95968	6.10249	7.87768	7.92332	7.12282	6.82656	7.33247
ENSMUST00000057337	0.021498	0.0641069	2.66772	down	Yes	chr19	fibroblast growth factor binding protein 3 [Source:MGI Symbol;Acc:MGI:1919764]	ENSMUSG00000047632	Fgfbp3		chr19:36917550-36919615:-	NM_028263	1772	TTTTGATTACTCTTTTTAAAATCAGCTAAAATGTAAACACGTATCTGGGTCATTTGGCCC	GENCODE	-			ASMM10AP1B100048831V4	36919615	36917550	protein_coding	250.044	827.084	7.94282	9.35843	239.359	229.747	64.9048	409.54	306.67	691.266	889.78	1354.76	547.513	652.103	8.10725	7.84114	6.38564	8.93006	8.45003	9.45942	9.87195	9.83174	8.53832	9.09071
ENSMUST00000109444	0.000462743	0.00633779	2.66729	down	No	chr13	collagen, type IV, alpha 3 (Goodpasture antigen) binding protein [Source:MGI Symbol;Acc:MGI:1915268]	ENSMUSG00000021669	Col4a3bp	Yes	chr13:96542735-96640167:+	NM_001164222	5285	TCCCTGAAATTTGTAAGAGAATATATGGTATTACTTGTTAAACCAAATCAGACTGTTTGA	GENCODE	+	Nucleus		ASMM10AP1B107642344V4	96640167	96542735	protein_coding	163.145	570.942	7.47689	8.89226	161.695	154.722	79.4045	213.256	206.646	570.867	440.182	605.038	681.036	557.589	7.50905	7.28483	6.69479	8.02926	7.86651	9.19609	8.87028	8.70095	8.85057	8.84343
ENSMUST00000022462	1.78383e-05	0.00126847	2.66565	down	Yes	chr14	oxidoreductase NAD-binding domain containing 1 [Source:MGI Symbol;Acc:MGI:1916953]	ENSMUSG00000021906	Oxnad1		chr14:32085413-32103202:+	NM_145460	2376	GCCAGCGACCAATAGTGTGAAGGGCTCCCTCTCATGGCGGTTACGTCAGTCCGGGGCCCG	GENCODE	+			ASMM10AP1B119820807V4	32103202	32085413	protein_coding	183.014	700.01	7.73319	9.14768	186.057	189.725	170.109	166.474	202.706	514.411	706.135	829.874	954.399	495.232	7.72272	7.57457	7.87316	7.65577	7.83973	9.03461	9.54153	9.14528	9.34019	8.67677
ENSMUST00000172910	0.000843439	0.00865172	2.6638	down	Yes	chr16	beta-gamma crystallin domain containing 3 [Source:MGI Symbol;Acc:MGI:2676311]	ENSMUSG00000022723	Crybg3		chr16:59492088-59600979:-		10454	AAGCAGTGAAGATTCCCCAAGCGGAGGACAGAAGGAACCATGCTGAACAGCCGGCCATCC	GENCODE	-			ASMM10AP1B100426821V4	59600979	59492088	protein_coding	12.2902	39.4418	3.69823	5.11171	16.7259	9.95617	8.22089	13.6541	12.8938	37.3475	43.2256	37.6372	40.9676	38.0308	4.1125	3.2384	3.16437	4.0653	3.91056	5.40565	5.66641	4.75967	4.84963	4.8772
ENSMUST00000002292	0.000150731	0.0035706	2.66241	down	Yes	chr6	required for meiotic nuclear division 5 homolog A [Source:MGI Symbol;Acc:MGI:1915727]	ENSMUSG00000002222	Rmnd5a	Yes	chr6:71388634-71440637:-	NM_024288	6165	CTGCTCTCGAGTGGGCAGTATCAAACCGAGAAATGCTCATAGCCCAAAACAGTTCCTTGG	GENCODE	-			ASMM10AP1B104278694V4	71440637	71388634	protein_coding	93.3355	328.401	6.70857	8.1213	126.034	101.837	61.9681	81.3382	95.5007	350.68	346.17	331.099	327.67	286.388	7.12057	6.69592	6.31432	6.62003	6.79201	8.5071	8.54233	7.8585	7.81341	7.88518
ENSMUST00000173433	0.000532369	0.00676899	2.66003	down	Yes	chr12	bromodomain adjacent to zinc finger domain 1A [Source:MGI Symbol;Acc:MGI:1309478]	ENSMUSG00000035021	Baz1a	Yes	chr12:54893551-54986507:-	NM_013815	5788	CAATCTACAGAGTCATCTCCTGTACCACTGAATCGAAGAAGTTCTGGCAGGCAAGGAGGT	GENCODE	-	Nucleus	Yes	ASMM10AP1B105537218V4	54986507	54893551	protein_coding	27.3608	90.1002	4.86471	6.27616	32.876	41.3632	16.2765	22.6242	23.6639	89.5373	86.9799	95.4013	75.6938	102.889	5.12513	5.36466	4.23069	4.79244	4.81064	6.58211	6.61208	6.11697	5.71002	6.35959
ENSMUST00000027271	0.00444475	0.0232695	2.6586	down	Yes	chr1	inositol polyphosphate-1-phosphatase [Source:MGI Symbol;Acc:MGI:104848]	ENSMUSG00000026102	Inpp1		chr1:52785427-52817688:-	NM_008384	5767	TGAGTTTACAAATGATTTGGGGGAAAAGATCACAGTGGAGCTGCAGTCCACGGAGGAGGA	GENCODE	-	Pseudopodium		ASMM10AP1B105300255V4	52817688	52785427	protein_coding	8.65548	27.3622	3.16553	4.5762	11.7952	5	7.57185	11.7832	7.12715	35.1885	25.4251	22.1746	25.6041	28.4187	3.58152	2.33065	3.03702	3.84998	3.02846	5.32428	4.95208	3.99502	4.17103	4.43857
ENSMUST00000119168	0.00440298	0.0231357	2.65801	down	No	chr15	zinc finger protein 740 [Source:MGI Symbol;Acc:MGI:1915994]	ENSMUSG00000046897	Zfp740		chr15:102203659-102215598:+	NM_001289694	3932	ACTGTTAAAAAGGTGAGAAACCATTTGAGTGTGATGTCTGTGATATGCGTTTCATCCAGA	GENCODE	+		Yes	ASMM10AP1B105689939V4	102215598	102203659	protein_coding	14.9805	46.9	3.9073	5.31765	13.4369	13.9717	6.26483	19.1182	22.1107	39.6799	31.281	56.2853	65.4176	41.8361	3.7744	3.75247	2.75493	4.54091	4.71381	5.49109	5.22597	5.34051	5.50988	5.02079
ENSMUST00000093902	8.82684e-06	0.000852994	2.65778	down	Yes	chr11	ring finger protein 213 [Source:MGI Symbol;Acc:MGI:1289196]	ENSMUSG00000070327	Rnf213		chr11:119393100-119487415:+	NM_001040005	16716	TGCACAGCAGGTGAGGAACAGGAAGGACCACGTAAGCCTGATGGACCGATACCTCGTCCA	GENCODE	+	Nucleus		ASMM10AP1B101005521V4	119487415	119393100	protein_coding	5.26677	17.2997	2.52592	3.93614	5.71517	5	5	5.43613	5.18253	13.6236	14.7382	19.2141	22.8285	16.0942	2.56875	2.33065	2.33871	2.77884	2.61267	4.04777	4.24832	3.78941	4.0045	3.59073
ENSMUST00000032842	0.00404232	0.021944	2.65704	down	Yes	chr7	coiled-coil domain containing 90B [Source:MGI Symbol;Acc:MGI:1913615]	ENSMUSG00000030613	Ccdc90b		chr7:92561149-92582294:+	NM_025515	1596	TGCAAATCTGAGAGCAGAGAATGAGAAAATGAAAATTGAACTAGATCAAGTTAAGCAGCA	GENCODE	+			ASMM10AP1B113482899V4	92582294	92561149	protein_coding	373.66	1223.95	8.5731	9.98292	265.847	275.683	159.226	521.584	645.963	1276.54	1082.56	1334.63	1394.44	1031.57	8.26196	8.09766	7.76923	9.25528	9.48139	10.342	10.1385	9.80517	9.86098	9.76798
ENSMUST00000180339	0.00197993	0.0142938	2.65662	down	Yes	chr9	RIKEN cDNA 4931406C07 gene [Source:MGI Symbol;Acc:MGI:1918234]	ENSMUSG00000031938	4931406C07Rik		chr9:15283337-15306448:-	NM_001199484	2756	CGGCGCCCAGCAGCCGGACTAGGACAAGGACGAAATCTCGCAGCCGGGACTGTTCCTGCT	GENCODE	-			ASMM10AP1B120304833V4	15306448	15283337	protein_coding	9.54832	30.9902	3.32753	4.73712	11.7151	12.3418	8.20869	9.01694	6.45906	29.3121	43.9533	27.4092	26.9901	27.2864	3.57144	3.55961	3.16246	3.46726	2.87687	5.07864	5.68988	4.29365	4.24509	4.37835
ENSMUST00000038739	0.0132233	0.0461765	2.65547	down	Yes	chr8	ring finger and WD repeat domain 3 [Source:MGI Symbol;Acc:MGI:2384584]	ENSMUSG00000033596	Rfwd3		chr8:111270944-111300222:-	NM_146218	4443	GCTGTCCTGTGTGTGTTTCAATGTTTTAATGTTAACAAAATAAAGAATTTGTAAGGTGTC	GENCODE	-			ASMM10AP1B100004372V4	111300222	111270944	protein_coding	2119.56	6307.01	10.9215	12.3305	1700.08	1120.49	529.439	3818.04	3429.76	5816.82	4859.73	7922.51	8583.5	4352.51	11.0057	10.3221	9.61637	11.9061	11.7574	12.561	12.3514	12.3287	12.4625	11.9489
ENSMUST00000034280	0.000573237	0.00704226	2.65528	down	Yes	chr8	zinc finger, DHHC domain containing 7 [Source:MGI Symbol;Acc:MGI:2142662]	ENSMUSG00000031823	Zdhhc7		chr8:120080890-120101482:-	NM_133967	3069	TCCCTTAATTAACTAGGGAATTTTTAAAATGTGCTTTAAAATAAAACTGGCTCTAAGCAC	GENCODE	-		Yes	ASMM10AP1B100115014V4	120101482	120080890	protein_coding	7.889	25.4185	3.02951	4.43837	8.97829	6.63698	5	8.59843	10.2313	22.2899	13.1365	35.2281	30.4767	25.9611	3.1678	2.67043	2.33871	3.40213	3.56846	4.70522	4.09556	4.66375	4.42155	4.30578
ENSMUST00000109867	0.00221564	0.0150775	2.65501	down	Yes	chr11	zinc and ring finger 3 [Source:MGI Symbol;Acc:MGI:3039616]	ENSMUSG00000041961	Znrf3	Yes	chr11:5276324-5444847:-	NM_001080924	6311	CAGACCAAAAATGATTTAAAGCAAGTTGTAGTCGTCTATGATTTTGTAACAAATTGTACA	GENCODE	-			ASMM10AP1B100150420V4	5444847	5276324	protein_coding	455.857	1619.49	8.93814	10.3469	373.151	383.955	220.276	707.256	594.646	1925.08	1459.94	1864.04	1824.89	1023.51	8.75926	8.61177	8.274	9.67591	9.36978	10.903	10.5606	10.2773	10.2344	9.75906
ENSMUST00000054654	0.0466017	0.108885	2.65447	down	Yes	chr11	zinc finger protein 286 [Source:MGI Symbol;Acc:MGI:2384758]	ENSMUSG00000047342	Zfp286		chr11:62778387-62789462:-	NM_001364097	3051	AGAGACCATAATATGACCCTGGGGTGTGTCTGTGTGTGTATGATTTCACTTGCCCTGTGT	GENCODE	-		Yes	ASMM10AP1B100886823V4	62789462	62778387	protein_coding	647.562	1894.13	9.05162	10.46	286.737	277.611	177.098	1213.79	1282.57	1269.79	1038.82	2849.35	3094.53	1218.18	8.36841	8.10725	7.93806	10.4155	10.4288	10.3312	10.0785	10.8678	11.0053	10.0174
ENSMUST00000097709	0.00852678	0.0350807	2.65413	down	Yes	chr1	isocitrate dehydrogenase 1 (NADP+), soluble [Source:MGI Symbol;Acc:MGI:96413]	ENSMUSG00000025950	Idh1		chr1:65158616-65179181:-	NM_010497	2302	ACGCGCGGGTGTGAGCCGGGTTATTGAAGTAAAAATGTCCAGAAAAATCCAAGGAGGTTC	GENCODE	-	Nucleus		ASMM10AP1B110937075V4	65179181	65158616	protein_coding	8.93786	28.6561	3.18534	4.59358	11.0562	7.27516	5	11.8803	9.47771	27.3218	32.5221	29.4411	38.5002	15.4952	3.48451	2.78232	2.33871	3.86379	3.45738	4.98897	5.27923	4.39905	4.76129	3.53935
ENSMUST00000138134	0.00586156	0.0276617	2.65405	down	No	chr15	GRAM domain containing 4 [Source:MGI Symbol;Acc:MGI:2676308]	ENSMUSG00000035900	Gramd4		chr15:86058727-86137618:+	NM_001205353	4292	AGAGGAACAAGGTGATCAAACTGATGGACATCACAGACATCCAGAAGGAGGAGAGCGTCC	GENCODE	+	Nucleus		ASMM10AP1B115199452V4	86137618	86058727	protein_coding	7.40537	24.6398	2.97724	4.38544	5.68738	10.0133	6.09478	6.7294	8.50196	30.9953	30.8691	14.6726	25.6151	21.047	2.56526	3.24523	2.71712	3.05916	3.29943	5.15344	5.20951	3.39627	4.17149	3.99647
ENSMUST00000159027	0.000747985	0.00804782	2.6533	down	Yes	chr14	protein phosphatase 3, catalytic subunit, beta isoform [Source:MGI Symbol;Acc:MGI:107163]	ENSMUSG00000021816	Ppp3cb		chr14:20499364-20546573:-	NM_008914	3831	GATGATTTCATGAGTTAAATTCTTGTCTCCATAAATTTTGTTTTCCCCTTCAACTTTTGT	GENCODE	-	Nucleus		ASMM10AP1B115696423V4	20546573	20499364	protein_coding	614.072	2211.41	9.41171	10.8195	578.795	568.838	300.163	835.208	787.357	2594.24	2130.36	2440.01	2182.65	1709.81	9.39392	9.26246	8.7423	9.89865	9.76121	11.3435	11.1102	10.6379	10.4911	10.5147
ENSMUST00000064019	0.000220048	0.00430377	2.653	down	No	chr11	target of myb1-like 2 (chicken) [Source:MGI Symbol;Acc:MGI:2443306]	ENSMUSG00000000538	Tom1l2	Yes	chr11:60240570-60352905:-	NM_001359810	2151	GGAGGACTCGCTTCTGCACTTGACAATCGGAAACAGAACTCAGAAATGGAAATGTATGGG	GENCODE	-			ASMM10AP1B101868953V4	60352905	60240570	protein_coding	23.0731	79.3816	4.67623	6.08386	27.2827	23.992	18.3854	21.6671	24.0384	92.0861	82.2061	82.8055	74.0864	65.7239	4.84707	4.5557	4.42345	4.72144	4.83351	6.62049	6.53235	5.90829	5.67915	5.679
ENSMUST00000062356	0.00499024	0.0250335	2.65139	down	Yes	chr4	MARCKS-like 1 [Source:MGI Symbol;Acc:MGI:97143]	ENSMUSG00000047945	Marcksl1		chr4:129513581-129515985:+	NM_010807	1605	CACCCGGATTTACTGTAACATTTGGAAAAGGAATAAATGTCGTCCCTTTAGTGATGTTTC	GENCODE	+			ASMM10AP1B100108976V4	129515985	129513581	protein_coding	421.224	1361.55	8.72417	10.1309	266.706	291.571	182.347	723.788	641.709	1084.61	1335.32	1607.3	1516.16	1264.36	8.26806	8.18389	7.98725	9.70804	9.47362	10.1145	10.4285	10.0661	9.98036	10.0651
ENSMUST00000003826	4.97598e-06	0.000644949	2.64964	down	Yes	chr9	5-hydroxytryptamine (serotonin) receptor 3A [Source:MGI Symbol;Acc:MGI:96282]	ENSMUSG00000032269	Htr3a		chr9:48899214-48911099:-	NM_013561	2082	CCCCCAGCCACCTTCCAAGCCAACAAGACTGATGACTGCTCAGGTTCTGATCTTCTTCCA	GENCODE	-			ASMM10AP1B117541951V4	48911099	48899214	protein_coding	567.988	2190.93	9.38931	10.7951	543.022	629.865	500.118	468.206	698.727	1537.19	2141.8	2952.83	2371.63	1951.2	9.29487	9.42484	9.5264	9.1114	9.58904	10.5939	11.1166	10.923	10.6176	10.7245
ENSMUST00000062686	0.00107396	0.00985044	2.64811	down	No	chr8	mitogen-activated protein kinase kinase 7 [Source:MGI Symbol;Acc:MGI:1346871]	ENSMUSG00000002948	Map2k7		chr8:4238761-4247897:+	NM_001164172	3525	TGTCTGTGTTGTCTTTGTCTACTGCCCTCTAATGTTAAGTGGGAGTCTGGAGGAGTCTCC	GENCODE	+	Pseudopodium		ASMM10AP1B116374172V4	4247897	4238761	protein_coding	124.266	434.778	7.05697	8.46193	101.099	110.425	63.6444	181.83	164.33	356.434	298.367	643.082	526.091	349.916	6.79359	6.81386	6.35708	7.78098	7.53935	8.53202	8.33314	8.79076	8.48166	8.1721
ENSMUST00000055984	0.000204966	0.00415398	2.64748	down	Yes	chr3	interferon stimulated exonuclease gene 20-like 2 [Source:MGI Symbol;Acc:MGI:2140076]	ENSMUSG00000048039	Isg20l2		chr3:87930314-87940686:+	NM_177663	2893	AGCCTCTTAGTTCATACGATTCTTTTTATGGATTTTTATAATAGAAAACTGGTGGGTTTG	GENCODE	+			ASMM10AP1B100184677V4	87940686	87930314	protein_coding	821.958	2962.4	9.84708	11.2517	850.386	820.124	383.086	1077.09	979.099	2890.08	2774.82	3483.97	3264.89	2398.24	9.96242	9.83863	9.11565	10.2503	10.0683	11.4932	11.4895	11.1536	11.0794	11.0429
ENSMUST00000062740	0.00156942	0.0124824	2.64747	down	Yes	chr12	acid phosphatase 1, soluble [Source:MGI Symbol;Acc:MGI:87881]	ENSMUSG00000044573	Acp1		chr12:30893326-30911571:-	NM_021330	3066	ATAGAAAATGCAAAGGAATTATGGAAGAGTGCAAAAATAAATCTCTGTCCACAGGAAGTG	GENCODE	-	Exosome		ASMM10AP1B100117070V4	30911571	30893326	protein_coding	9.79162	29.9721	3.31566	4.72027	9.36464	8.21284	5.54468	16.3936	9.44231	27.2385	22.81	35.4948	33.6486	30.6688	3.23042	2.95036	2.61925	4.32685	3.4514	4.98437	4.81509	4.67576	4.57044	4.5557
ENSMUST00000023836	0.000103751	0.00298576	2.6465	down	Yes	chrX	motile sperm domain containing 1 [Source:MGI Symbol;Acc:MGI:1917630]	ENSMUSG00000023074	Mospd1		chrX:53345021-53370502:-	NM_027409	1763	CAACCAGGTAAAAACAGAGCCGTCTCTTCAGGACCTAGTTTGCTAACTGTCTTCCTGGGT	GENCODE	-			ASMM10AP1B107648998V4	53370502	53345021	protein_coding	206.978	747.369	7.89074	9.29482	254.049	206.496	142.935	197.733	233.679	752.832	803.994	715.511	709.268	755.241	8.1934	7.69388	7.60082	7.91608	8.04951	9.59154	9.72102	8.93641	8.91112	9.31403
ENSMUST00000086564	0.000145096	0.00353214	2.64628	down	Yes	chr5	G protein-coupled receptor kinase-interactor 2 [Source:MGI Symbol;Acc:MGI:1347053]	ENSMUSG00000041890	Git2		chr5:114729575-114773462:-		2984	GGTGAATAACAACTTGAGTGACGAGCTGAGAATTATGCAGAAAAAGCTTCAAACTCTCCA	GENCODE	-			ASMM10AP1B112096647V4	114773462	114729575	protein_coding	13.9755	46.3451	3.92793	5.33189	14.4711	12.9501	11.2142	14.9221	16.32	50.1006	41.3219	53.4221	43.9135	42.9672	3.88893	3.63416	3.65696	4.19378	4.2658	5.79668	5.60222	5.25772	4.94572	5.05712
ENSMUST00000156203	0.0106661	0.0401026	2.64607	down	Yes	chr14	UDP-glucose glycoprotein glucosyltransferase 2 [Source:MGI Symbol;Acc:MGI:1913685]	ENSMUSG00000042104	Uggt2		chr14:118985039-119099430:-	NM_001081252	6456	AGGCATGTGGGATTCAATTAAAAGCTTCACAAAAAGTCTGCATAAAGATGAGAAAAAGGA	GENCODE	-	Nucleus		ASMM10AP1B100847319V4	119099430	118985039	protein_coding	9.52531	28.1167	3.22085	4.6247	6.29326	8.37485	5	15.1063	12.8521	29.8671	31.2145	25.2013	26.7271	27.5737	2.66981	2.97988	2.33871	4.2107	3.90515	5.1059	5.22352	4.16958	4.23233	4.39216
ENSMUST00000087527	6.07002e-05	0.00230704	2.6453	down	No	chr6	ATP-binding cassette, sub-family C (CFTR/MRP), member 9 [Source:MGI Symbol;Acc:MGI:1352630]	ENSMUSG00000030249	Abcc9		chr6:142589131-142702218:-	NM_021041	6213	GCTCCGACAAGTGTCTCATTCTCTGCATCGGGTTCACACCATTCTGACTGCAGACCTGGT	GENCODE	-			ASMM10AP1B104636954V4	142702218	142589131	protein_coding	84.1392	292.958	6.55992	7.96335	111.986	107.195	64.8499	71.6212	65.0443	279.881	300.738	311.045	289.608	283.516	6.94454	6.77038	6.38449	6.43618	6.264	8.19253	8.34301	7.775	7.63406	7.87214
ENSMUST00000094481	0.00202245	0.0144456	2.64518	down	Yes	chr4	Friend virus susceptibility 1 [Source:MGI Symbol;Acc:MGI:95595]	ENSMUSG00000070583	Fv1		chr4:147868979-147870358:+	NM_010244	1380	AGCGTGGCTGCTCAGTTGCATGATCTAATAGAATTAAGTTTAAAGCCAACAGCAGCTGGC	GENCODE	+	Nucleus		ASMM10AP1B100067208V4	147870358	147868979	protein_coding	11.5069	35.6149	3.55659	4.95995	10.4589	11.015	5.7697	16.8706	13.4202	36.8098	25.6925	36.453	39.8306	39.2886	3.39994	3.38936	2.65829	4.365	3.97034	5.38685	4.9658	4.71303	4.80759	4.92651
ENSMUST00000048145	9.08188e-05	0.00281202	2.64351	down	No	chr15	RNA binding protein, fox-1 homolog (C. elegans) 2 [Source:MGI Symbol;Acc:MGI:1933973]	ENSMUSG00000033565	Rbfox2	Yes	chr15:77083802-77306605:-	NM_175387	1720	CGCCTATCCAGGGGTGGATATGCAGCCTACAGATATGCACAGCCTGCTACTGCAACCGCA	GENCODE	-		Yes	ASMM10AP1B104699606V4	77306605	77083802	protein_coding	41.9186	145.949	5.57248	6.97493	47.5385	47.2745	43.0063	34.2741	37.4998	162.146	152.268	149.692	132.217	133.422	5.67945	5.56853	5.73558	5.40052	5.47832	7.41384	7.40892	6.77927	6.51404	6.75859
ENSMUST00000219915	0.001081	0.00987666	2.64193	down	Yes	chr10	Hbs1-like (S. cerevisiae) [Source:MGI Symbol;Acc:MGI:1891704]	ENSMUSG00000019977	Hbs1l	Yes	chr10:21296033-21368883:+	NM_019702	2733	TCTGATGTCTTCAAAGATCAAGGATCTGGCTTTTGTGTGACTGGTAAAATTGAAGCTGGT	GENCODE	+	Nucleus		ASMM10AP1B110814823V4	21368883	21296033	protein_coding	227.782	817.042	8.00747	9.40906	316.45	226.271	139.329	217.889	238.969	973.223	865.748	726.141	650.451	869.647	8.5169	7.81794	7.55996	8.05831	8.08422	9.95738	9.82746	8.95772	8.78494	9.5178
ENSMUST00000207429	0.000282406	0.00497559	2.64104	down	Yes	chr11	Rap guanine nucleotide exchange factor (GEF) 6 [Source:MGI Symbol;Acc:MGI:2384761]	ENSMUSG00000037533	Rapgef6	Yes	chr11:54522946-54696344:+	NM_001252494	5164	AGCTGTTGGTTTTTACTATATTCCTGATCAAGTTATAAGAGTTTTCAAAGCAGATCAACA	GENCODE	+	Nucleus		ASMM10AP1B103170707V4	54696344	54522946	protein_coding	7.50445	22.2507	2.90167	4.30278	11.5495	8.11576	7.1868	5	5.67016	19.8913	19.5323	25.5312	22.3313	23.9677	3.55106	2.93487	2.95498	2.35905	2.70839	4.55182	4.60873	4.189	3.9725	4.19183
ENSMUST00000046254	0.0031275	0.0185893	2.63976	down	Yes	chr17	leucine rich repeat and fibronectin type III domain containing 2 [Source:MGI Symbol;Acc:MGI:1917780]	ENSMUSG00000040490	Lrfn2		chr17:48932379-49097588:+	NM_027452	3202	CTTCGGATTGCTTATGGATCCAGTGTTGTTTTGATTTCTTAATTTATTTTTCCATTTCCC	GENCODE	+			ASMM10AP1B100031330V4	49097588	48932379	protein_coding	26.1098	84.0219	4.73103	6.13144	18.2736	27.6166	16.1458	49.1678	19.3451	78.3838	51.3848	121.641	94.2069	74.4929	4.24624	4.76616	4.21817	5.90829	4.51631	6.40003	5.89294	6.47184	6.02404	5.86835
ENSMUST00000223679	7.82713e-05	0.00259101	2.63921	down	Yes	chr14	N-deacetylase/N-sulfotransferase (heparan glucosaminyl) 2 [Source:MGI Symbol;Acc:MGI:97040]	ENSMUSG00000039308	Ndst2		chr14:20723730-20734562:-	NM_010811	3907	TCCCAGTTCATCCACAAACGGAGCTTTGTAATCTCGGATTGTAAGGGCCAAGCTTGTGGA	GENCODE	-			ASMM10AP1B111246047V4	20734562	20723730	protein_coding	6.36851	19.192	2.68749	4.0876	8.88088	7.60698	5	5.3547	5	15.7689	15.9379	25.1913	19.5086	19.5534	3.15385	2.8388	2.33871	2.76152	2.34458	4.25031	4.35058	4.16895	3.78154	3.88661
ENSMUST00000030432	0.00031488	0.00523747	2.63761	down	Yes	chr4	3-hydroxy-3-methylglutaryl-Coenzyme A lyase [Source:MGI Symbol;Acc:MGI:96158]	ENSMUSG00000028672	Hmgcl		chr4:135946448-135962617:+	NM_008254	1418	TGCCCAGTGGGTTGGCCTCCGGAGTGAAGATGGCGTCAGTGAGGAAGGCTTTCCCGCGGA	GENCODE	+			ASMM10AP1B120076593V4	135962617	135946448	protein_coding	7.81289	23.9778	3.00666	4.40589	8.1257	10.855	5	8.33092	6.75278	22.4677	20.6816	26.0707	22.7074	27.9613	3.02364	3.36836	2.33871	3.35908	2.9435	4.7163	4.68071	4.22239	3.99604	4.41399
ENSMUST00000029336	0.000920793	0.00908834	2.63743	down	Yes	chr3	DEAH (Asp-Glu-Ala-His) box polypeptide 36 [Source:MGI Symbol;Acc:MGI:1919412]	ENSMUSG00000027770	Dhx36		chr3:62468013-62507004:-	NM_028136	5620	TCCCAAAGTTGCTAAAATCCGACTAAATTTGGGTAAAAAGAGGAAAATGGTAAAAGTTCA	GENCODE	-			ASMM10AP1B100547746V4	62507004	62468013	protein_coding	283.769	988.148	8.28247	9.6816	272.622	253.839	141.442	346.46	404.485	999.322	1023.52	977.172	1128.57	812.149	8.29721	7.97431	7.58399	8.71086	8.84596	9.99443	10.0596	9.386	9.5558	9.4122
ENSMUST00000226781	0.0292761	0.0791351	2.63476	down	Yes	chr15	epiplakin 1 [Source:MGI Symbol;Acc:MGI:2386306]	ENSMUSG00000115388	Eppk1		chr15:76101481-76120195:-	NM_144848	12332	TACAACTTTTCGTGTCTTCATGTCTTTTGATAATAAATGAATTTTCCGCTCTTGTGGGGA	GENCODE	-			ASMM10AP1B100127845V4	76120195	76101481	protein_coding	42.6447	131.944	5.33521	6.73288	35.1561	21.6402	17.4777	60.1097	78.8398	145.688	105.665	183.531	159.281	65.5534	5.22514	4.39643	4.34011	6.18917	6.5252	7.27107	6.88519	7.05373	6.77913	5.6753
ENSMUST00000022507	0.0105968	0.0399261	2.63362	down	Yes	chr14	paraspeckle protein 1 [Source:MGI Symbol;Acc:MGI:1913895]	ENSMUSG00000021938	Pspc1	Yes	chr14:56720710-56778316:-	NM_025682	4114	GCTTTTCTGATTTAGTGTGACATTGTCATATGTACTATTATAATTCCTTCCTACAAAAGT	GENCODE	-		Yes	ASMM10AP1B100078054V4	56778316	56720710	protein_coding	7.31914	21.8282	2.83098	4.22802	5	5	5	6.40707	15.1886	21.3965	17.7757	29.8339	26.2709	13.8641	2.33259	2.33065	2.33871	2.99381	4.15914	4.65246	4.48869	4.41862	4.20833	3.37202
ENSMUST00000106448	0.00275866	0.0172553	2.62934	down	Yes	chr4	eukaryotic translation initiation factor 2B, subunit 3 [Source:MGI Symbol;Acc:MGI:1313286]	ENSMUSG00000028683	Eif2b3		chr4:117019402-117086852:+	NM_001111277	1555	TGCGGCGTGCGGATAGCTGAGCTTTATAAAAATGGAGTTTCAAGCGGTGGTTATGGCCGT	GENCODE	+			ASMM10AP1B104571995V4	117086852	117019402	protein_coding	12.8532	39.3007	3.71054	5.10524	19.5707	15.6292	7.3226	7.87509	13.8686	40.0383	43.3121	36.5321	34.7428	41.878	4.3525	3.91444	2.98614	3.27705	4.02255	5.50411	5.6708	4.71467	4.61443	5.02218
ENSMUST00000100052	0.000978513	0.00938116	2.6291	down	Yes	chr16	insulin-like growth factor 2 mRNA binding protein 2 [Source:MGI Symbol;Acc:MGI:1890358]	ENSMUSG00000033581	Igf2bp2		chr16:22059009-22163299:-	NM_183029	3899	GGTGCCGGGCCGGGGGAGCCGCGGGCTCTCGGGAAGACGCGGATGATGAACAAGCTGTAC	GENCODE	-	Exosome		ASMM10AP1B128052356V4	22163299	22059009	protein_coding	10.8231	34.8601	3.5278	4.92237	14.247	7.36675	10.5884	11.782	10.1314	29.2671	41.3547	37.0657	37.626	28.987	3.86476	2.79757	3.5731	3.84987	3.55371	5.07625	5.60305	4.73752	4.72874	4.46628
ENSMUST00000048250	0.00179156	0.013542	2.62891	down	Yes	chrX	TGF-beta activated kinase 1/MAP3K7 binding protein 3 [Source:MGI Symbol;Acc:MGI:1913974]	ENSMUSG00000035476	Tab3		chrX:85574022-85634469:+	NM_001358447	6364	CACTGGACTTGAAGAAAATGACAGAGTGTTTGGAAGATTATTACTTTTGGAAGTCCTGCT	GENCODE	+	Nucleus		ASMM10AP1B106341394V4	85634469	85574022	protein_coding	6.83117	21.5032	2.8475	4.24196	5.78535	6.2135	5	8.76346	8.39354	20.6737	23.5956	25.0971	20.6065	17.5432	2.5818	2.60702	2.33871	3.43061	3.27934	4.6065	4.85874	4.16437	3.85702	3.72319
ENSMUST00000067990	0.000221566	0.00431769	2.62684	down	Yes	chr14	defensin beta 42 [Source:MGI Symbol;Acc:MGI:3033850]	ENSMUSG00000054763	Defb42		chr14:63046991-63048610:+	NM_001034910	618	TGGGGACTTTTCCACAGCAGAATCTGGCCAAACGAAAGCTGGGCTCTCCCTGGAAGAGTG	GENCODE	+			ASMM10AP1B111374633V4	63048610	63046991	protein_coding	340.201	1362.93	8.64327	10.0366	386.541	306.709	325.832	291.693	390.23	717.393	1280.23	1661.62	2164.37	991.034	8.81155	8.25613	8.87589	8.47821	8.79458	9.51932	10.3624	10.1138	10.4782	9.70938
ENSMUST00000034534	0.00104375	0.00970642	2.62618	down	Yes	chr9	E26 avian leukemia oncogene 1, 5' domain [Source:MGI Symbol;Acc:MGI:95455]	ENSMUSG00000032035	Ets1		chr9:32696022-32757820:+	NM_011808	5080	TTCCTTTGATTCACTGTCAGGCTTTGGACTTAGTGTTAGTTACGGGGCGTTAAGTCTCTG	GENCODE	+		Yes	ASMM10AP1B109518532V4	32757820	32696022	protein_coding	95.384	319.33	6.68841	8.08138	105.55	76.1175	49.5678	142.892	102.793	305.787	303.043	364.228	327.605	295.986	6.85592	6.2847	5.96889	7.43696	6.89558	8.31923	8.357	7.9851	7.81298	7.93259
ENSMUST00000106491	0.000505053	0.00659947	2.62595	down	No	chr3	CDC14 cell division cycle 14A [Source:MGI Symbol;Acc:MGI:2442676]	ENSMUSG00000033502	Cdc14a		chr3:116272553-116423986:-	NM_001173553	4292	CGACCAGCGGAAAAGAGCAAACGCAGCATTCTTGATAGGTGCTTATGCCGGATTACAGCA	GENCODE	-			ASMM10AP1B103898112V4	116423986	116272553	protein_coding	7.23191	21.4016	2.83618	4.22902	9.3567	7.71454	5	5	9.0883	16.4975	18.8721	25.3681	27.5223	18.7478	3.22918	2.85884	2.33871	2.35905	3.39512	4.3089	4.56323	4.17971	4.27447	3.81878
ENSMUST00000113337	0.000452808	0.00625698	2.62439	down	Yes	chr17	ubiquitin protein ligase E3 component n-recognin 2 [Source:MGI Symbol;Acc:MGI:1861099]	ENSMUSG00000023977	Ubr2	Yes	chr17:46928295-47010520:-	NM_146078	7633	AGCTGTTCGCGCTTCGATTTGCTAAAAATTACCGGCAGTTGCAGAGGGATTTTATGGAGG	GENCODE	-	Nucleus;Exosome		ASMM10AP1B117346341V4	47010520	46928295	protein_coding	18.0115	57.413	4.24362	5.6356	21.5506	23.9915	9.26281	17.7125	17.5401	53.25	49.7896	64.7058	62.9779	56.3419	4.50189	4.55557	3.35246	4.4376	4.37057	5.87787	5.85056	5.54082	5.4561	5.45268
ENSMUST00000180290	9.48532e-05	0.00286062	2.62383	down	Yes	chr2	phosphatase, orphan 2 [Source:MGI Symbol;Acc:MGI:1920623]	ENSMUSG00000027088	Phospho2		chr2:69790972-69797222:+		3267	ATTAATTTTAGGAGTTAAAAAGTCTTTGTTCCTTTGCTGCATATCAGAGCAATTTCTCTG	GENCODE	+	Nucleus		ASMM10AP1B118241786V4	69797222	69790972	protein_coding	46.6653	160.534	5.71736	7.10904	51.497	56.7817	35.4303	46.2752	43.3421	168.434	160.612	176.928	132.212	164.482	5.80123	5.84526	5.43243	5.82288	5.68501	7.47511	7.47739	7.00515	6.51391	7.07364
ENSMUST00000007245	4.81905e-05	0.00205858	2.62373	down	Yes	chr17	von Willebrand factor A domain containing 7 [Source:MGI Symbol;Acc:MGI:1306798]	ENSMUSG00000007030	Vwa7		chr17:35016579-35026741:+	NM_138582	4313	CCTGTCTGCCCTGGAGCTAGCCCTGTTGCACACCCCTCCCCTCTCTGACATCTTTGTCTT	GENCODE	+	Cytoplasm		ASMM10AP1B116378610V4	35026741	35016579	protein_coding	4118.16	14877	12.1911	13.5828	3199.27	3467.02	2853.56	5452.03	5618.94	8626	10786.7	20849.3	23316.5	10806.7	11.9376	12.0148	12.2129	12.3717	12.4187	13.1496	13.6032	13.7852	13.9966	13.3792
ENSMUST00000034944	0.000993104	0.00946136	2.62194	down	Yes	chr9	death-associated protein kinase 2 [Source:MGI Symbol;Acc:MGI:1341297]	ENSMUSG00000032380	Dapk2	Yes	chr9:66158223-66272242:+	NM_010019	1772	GCTCACTTTGATCTCAAGCCAGAAAACATCATGTTGTTAGACAAGAATATCCCAATTCCA	GENCODE	+			ASMM10AP1B114348990V4	66272242	66158223	protein_coding	17.1239	56.4834	4.21176	5.60239	16.376	18.6594	11.7322	21.1984	17.6535	59.2221	62.7432	57.2912	43.1513	60.0091	4.0808	4.17649	3.7285	4.69164	4.38134	6.02294	6.15771	5.36692	4.92177	5.5426
ENSMUST00000027165	0.00140224	0.0117214	2.62119	down	Yes	chr1	CD28 antigen [Source:MGI Symbol;Acc:MGI:88327]	ENSMUSG00000026012	Cd28		chr1:60746358-60773359:+	NM_007642	4347	TGGCTTGCTAGTGACAGTGGCTCTTTGTGTTATCTGGACAAATAGTAGAAGGAACAGACT	GENCODE	+			ASMM10AP1B104498202V4	60773359	60746358	protein_coding	17.9918	56.922	4.23271	5.62294	19.9974	19.1769	8.5658	20.7056	21.5135	57.4109	48.0192	60.4279	56.7832	61.9689	4.38748	4.21657	3.22967	4.65546	4.67438	5.97845	5.80275	5.44015	5.30882	5.5845
ENSMUST00000046049	0.000385825	0.00576496	2.62032	down	Yes	chr1	flavin containing monooxygenase 1 [Source:MGI Symbol;Acc:MGI:1310002]	ENSMUSG00000040181	Fmo1		chr1:162829561-162866610:-	NM_010231	2388	ACTTCTGCATTTACTGAGAAACATGGTGAAGCGAGTGGCAATTGTGGGAGCTGGGGTCAG	GENCODE	-			ASMM10AP1B118507908V4	162866610	162829561	protein_coding	12.4332	40.1236	3.73715	5.12689	14.4134	10.4089	9.19024	13.4078	14.7458	39.4608	38.482	36.4326	49.206	37.0369	3.88304	3.30452	3.3404	4.04157	4.11622	5.48363	5.50662	4.71185	5.09622	4.83613
ENSMUST00000094805	0.00229579	0.015385	2.61864	down	Yes	chr7	coiled-coil domain containing 8 [Source:MGI Symbol;Acc:MGI:3612184]	ENSMUSG00000041117	Ccdc8		chr7:16992708-16997516:+	NM_001101535	4809	CTTTTTGCACTTAAAGAGAAAACTCAAGTTGATATGCAAATAAAAATGTGTACAAGGTGG	GENCODE	+			ASMM10AP1B100184060V4	16997516	16992708	protein_coding	330.423	1151.65	8.45704	9.84586	302.858	201.277	177.797	538.703	431.48	906.984	847.511	1535.84	1579.67	888.238	8.44991	7.65736	7.94461	9.2982	8.93514	9.84441	9.79618	10.0147	10.031	9.54298
ENSMUST00000021345	0.00138759	0.011641	2.6182	down	Yes	chr12	general transcription factor II A, 1 [Source:MGI Symbol;Acc:MGI:1933277]	ENSMUSG00000020962	Gtf2a1		chr12:91555262-91590009:-	NM_031391	6064	CTCAGTTCAGAGTTTGTAAATAATTGCTTATTAGGAGATTTGGATTATTGAGGTTTGTAT	GENCODE	-		Yes	ASMM10AP1B100035229V4	91590009	91555262	protein_coding	1124	3803.92	10.2141	11.6027	1074.41	876.109	435.184	1662.43	1571.85	3636.45	3269.45	4628.1	4681.1	2804.47	10.3203	9.92796	9.30566	10.8159	10.7007	11.8352	11.7321	11.5672	11.5873	11.2916
ENSMUST00000013693	3.93013e-05	0.00188639	2.61773	down	Yes	chr5	COMM domain containing 8 [Source:MGI Symbol;Acc:MGI:1343485]	ENSMUSG00000029213	Commd8		chr5:72156575-72168189:-	NM_001356612	3895	GGAGCAGGGCGCCGGGCTTCTTCACAAAATCATTGATGGCTTCTGTGGCCGAGCTTATCC	GENCODE	-			ASMM10AP1B122603262V4	72168189	72156575	protein_coding	52.0337	177.591	5.87216	7.26047	58.4201	53.9407	38.3388	49.4266	60.0421	168.54	181.405	182.321	171.976	183.712	5.98062	5.76732	5.55667	5.91392	6.14225	7.47659	7.65404	7.04419	6.88738	7.24016
ENSMUST00000042970	0.000142323	0.00348921	2.61645	down	Yes	chr11	potassium inwardly-rectifying channel, subfamily J, member 2 [Source:MGI Symbol;Acc:MGI:104744]	ENSMUSG00000041695	Kcnj2		chr11:111066164-111076821:+	NM_008425	5444	GCCATCTGTTTTGTATCTAAAGTCTTCCTATTGTACTGCACAAACCATGGGTTGTATATA	GENCODE	+			ASMM10AP1B100175620V4	111076821	111066164	protein_coding	4734.5	15575.1	12.369	13.7566	4270.29	4905.6	2404.77	6829.08	5262.76	14415.2	16185.3	20617.1	14369	12289	12.355	12.4955	11.9612	12.7177	12.3155	13.9821	14.2101	13.761	13.2672	13.5627
ENSMUST00000215311	0.00293692	0.0179151	2.61571	down	Yes	chr9	ataxia telangiectasia and Rad3 related [Source:MGI Symbol;Acc:MGI:108028]	ENSMUSG00000032409	Atr		chr9:95857706-95951781:+	NM_019864	8102	AGAAACTTGCACAAAACAAACCAAAAGGAGGTAAGGTCAACAAAATATTATCAAATGTGA	GENCODE	+	Nucleus	Yes	ASMM10AP1B110344497V4	95951781	95857706	protein_coding	8.38657	26.7278	3.14531	4.53251	10.302	5.97128	5.80294	8.76752	11.0891	37.199	20.7212	27.3854	22.9325	25.4009	3.37565	2.56806	2.66395	3.43139	3.68749	5.4007	4.68348	4.29295	4.01046	4.27495
ENSMUST00000111920	0.00104669	0.00970642	2.61419	down	Yes	chr2	pleckstrin homology domain-containing, family A (phosphoinositide binding specific) member 3 [Source:MGI Symbol;Acc:MGI:1932515]	ENSMUSG00000002733	Plekha3		chr2:76675281-76696828:+	NM_031256	2534	TCGTCCACCGTGATGAGAGGCATCCCTCTCCCAGTGTGGAGAACATGAATGAAGCCTCCT	GENCODE	+	Exosome		ASMM10AP1B126820149V4	76696828	76675281	protein_coding	666.005	2369.54	9.49209	10.8785	493.575	495.117	383.536	809.984	1147.81	1677.08	2170	2983.42	3349.44	1667.75	9.15659	9.04323	9.11738	9.8562	10.287	10.7123	11.1394	10.9405	11.1193	10.4807
ENSMUST00000156326	0.00280585	0.0173884	2.61363	down	Yes	chr11	transmembrane and ubiquitin-like domain containing 2 [Source:MGI Symbol;Acc:MGI:1919303]	ENSMUSG00000034757	Tmub2		chr11:102285196-102289237:+	NM_001302505	2249	GGGAGTGAGACGTAATTGCTATCATTTGTTTATTGAACAGTGTTAATTATTTTTGCTTCG	GENCODE	+			ASMM10AP1B107966019V4	102289237	102285196	protein_coding	5	15.5372	2.34112	3.72717	5	5	5	5	5	13.1652	20.9064	20.6179	13.4521	9.5445	2.33259	2.33065	2.33871	2.35905	2.34458	4.0021	4.69485	3.8899	3.25087	2.79812
ENSMUST00000053175	1.47286e-05	0.00113484	2.61304	down	Yes	chr14	V-set and transmembrane domain containing 4 [Source:MGI Symbol;Acc:MGI:2444633]	ENSMUSG00000050666	Vstm4		chr14:32856756-32939491:+	NM_178791	2745	GAGGAAAGTCGCCCTGCCCAAGATCACCGAGGAAAACTTGACCTATGCCGAGCTGGAGCT	GENCODE	+			ASMM10AP1B104108051V4	32939491	32856756	protein_coding	115.605	424.313	7.03952	8.42525	99.3955	129.301	95.8704	115.506	137.951	327.876	330.543	550.897	606.595	305.652	6.76371	7.03219	6.97952	7.12404	7.29813	8.41322	8.4814	8.57591	8.67911	7.97659
ENSMUST00000002063	0.0129493	0.045591	2.61254	down	Yes	chr2	adaptor-related protein complex AP-4, epsilon 1 [Source:MGI Symbol;Acc:MGI:1336993]	ENSMUSG00000001998	Ap4e1		chr2:127008730-127067909:+	NM_175550	4600	GCTGCAGCAGAACCTGAGACTTCGTGTGATTGACGTCATAGGCAATGAAGGGCTGTTGGC	GENCODE	+			ASMM10AP1B105079822V4	127067909	127008730	protein_coding	8.34408	24.8116	3.01893	4.40439	13.7821	11.4427	6.27366	5.22192	5	28.8212	33.4836	18.354	17.3415	26.058	3.81363	3.44819	2.75708	2.73118	2.34458	5.05695	5.32092	3.71947	3.61402	4.31056
ENSMUST00000023213	0.000292269	0.00503787	2.60866	down	Yes	chr15	HGH1 homolog [Source:MGI Symbol;Acc:MGI:1930628]	ENSMUSG00000022554	Hgh1		chr15:76368898-76371437:+	NM_021555	1993	CGATGTGCGGATGGCTTGCGAAAAACTTATCCAGGTGCTTATTGGTGATGAGCCAGAGGC	GENCODE	+	Exosome		ASMM10AP1B118114236V4	76371437	76368898	protein_coding	7.85996	24.6802	3.06288	4.44619	9.49436	7.1741	5.54471	7.3639	9.7227	22.0581	24.7254	28.3281	23.0602	25.2294	3.25165	2.76529	2.61933	3.18247	3.49566	4.6899	4.91739	4.34073	4.01764	4.26528
ENSMUST00000054836	0.00182421	0.0136898	2.60752	down	Yes	chr5	harakiri, BCL2 interacting protein (contains only BH3 domain) [Source:MGI Symbol;Acc:MGI:1201608]	ENSMUSG00000046607	Hrk		chr5:118169748-118189478:+	NM_007545	5382	CCTGGATGCTTTGTACATATTTGTTACACTTTTATTTAAAAATTGACTGTGCACCTCTAA	GENCODE	+	Cytoplasm		ASMM10AP1B100201437V4	118189478	118169748	protein_coding	39.8599	139.16	5.44006	6.82273	33.461	51.9006	23.8178	45.0396	45.0802	188.61	68.5605	167.855	158.199	112.573	5.15328	5.70852	4.81416	5.78098	5.74333	7.63457	6.28167	6.93534	6.76888	6.49321
ENSMUST00000153838	0.00123649	0.0108298	2.60712	down	Yes	chr9	SET domain containing 2 [Source:MGI Symbol;Acc:MGI:1918177]	ENSMUSG00000044791	Setd2	Yes	chr9:110532597-110618633:+	NM_001081340	8350	AGAAAATGAGGCAAAGATTGAAAATGTGCAGAAAACAGGTTTCATCAAAGGACCAGTGTT	GENCODE	+	Nucleus	Yes	ASMM10AP1B105690974V4	110618633	110532597	protein_coding	93.5994	311.409	6.65489	8.03735	92.9683	93.3786	44.3987	133.225	104.026	330.395	276.151	351.198	348.76	250.543	6.66975	6.57882	5.7873	7.32596	6.91261	8.42452	8.23183	7.93859	7.89751	7.69429
ENSMUST00000015146	0.000395799	0.00582875	2.60679	down	Yes	chr15	EFR3 homolog A [Source:MGI Symbol;Acc:MGI:1923990]	ENSMUSG00000015002	Efr3a		chr15:65787040-65873816:+	NM_001356582	5215	GTCCGTCCCAGTCTATGAGATGAAGTTTCCAGATCTGTGTGTATATTGACTGGCTCATGA	GENCODE	+	Nucleus		ASMM10AP1B116428412V4	65873816	65787040	protein_coding	243.964	868.762	8.12035	9.50262	298.149	248.863	152.809	250.039	269.963	981.638	875.388	855.603	711.942	919.238	8.42393	7.94712	7.70274	8.26095	8.26699	9.9661	9.84577	9.18374	8.91457	9.6029
ENSMUST00000045235	3.34747e-05	0.00175354	2.60649	down	Yes	chr6	base methyltransferase of 25S rRNA 2 [Source:MGI Symbol;Acc:MGI:2141466]	ENSMUSG00000042742	Bmt2		chr6:13625673-13677966:-	NM_175312	4143	AGATATTGTACCTGCTGTAGAGAGTGTGTATAAGTGTGACTTCCTGAACCTGCAGCTGCA	GENCODE	-	Cytoplasm		ASMM10AP1B116126532V4	13677966	13625673	protein_coding	28.3649	96.0168	4.98796	6.37007	30.2981	28.5982	23.0974	28.5622	31.2684	97.6963	93.3129	104.9	95.0343	89.1404	5.00343	4.81939	4.76806	5.13615	5.21277	6.70613	6.70922	6.26149	6.03777	6.13574
ENSMUST00000017637	0.00974592	0.0381398	2.6056	down	Yes	chr11	insulin-like growth factor binding protein 4 [Source:MGI Symbol;Acc:MGI:96439]	ENSMUSG00000017493	Igfbp4		chr11:99041244-99054392:+	NM_010517	3831	ACGTATTGAAAACATACTATGTGCCAGCTTTAGTTTTCAGCGCCGGGAAGCCTCGTTGTG	GENCODE	+			ASMM10AP1B107572649V4	99054392	99041244	protein_coding	63.2091	191.314	5.96943	7.35105	63.1623	36.3027	25.9105	102.123	88.5468	178.955	173.06	234.316	205.001	165.239	6.09604	5.17416	4.95102	6.93738	6.68858	7.56043	7.58399	7.3882	7.14276	7.07988
ENSMUST00000053426	0.000159005	0.00368308	2.60481	down	Yes	chr5	PTC7 protein phosphatase homolog [Source:MGI Symbol;Acc:MGI:2444593]	ENSMUSG00000038582	Pptc7		chr5:122284365-122324281:+	NM_177242	4644	ACTGTTTACCATGTACCATGTACATGTCAGTGCTCTCAGTGCATCATGCTTGTAACAGGC	GENCODE	+	Nucleus		ASMM10AP1B111251577V4	122324281	122284365	protein_coding	79.838	280.032	6.51303	7.89421	95.8335	84.8936	65.0597	75.5751	77.8284	343.994	279.715	266.474	254.308	255.667	6.71269	6.44376	6.39043	6.5125	6.50578	8.47715	8.25214	7.56974	7.44999	7.72203
ENSMUST00000165971	0.000671248	0.00765923	2.60413	down	Yes	chr10	septin 10 [Source:MGI Symbol;Acc:MGI:1918110]	ENSMUSG00000019917	Sept10		chr10:59164120-59221847:-	NM_001024911	2532	TTTTGGCGTCAGGTAGCAGCATTAGGAAGGACAAAGACCGAAAGAACTCCAATTTTATGT	GENCODE	-	Nucleus		ASMM10AP1B114030979V4	59221847	59164120	protein_coding	47.3267	160.108	5.71339	7.09419	61.1717	51.7459	29.5912	45.6573	48.4673	151.738	200.753	158.822	163.614	125.613	6.04827	5.704	5.16024	5.80561	5.84884	7.32929	7.80366	6.86217	6.81539	6.66046
ENSMUST00000201948	0.000941851	0.00918772	2.60317	down	Yes	chr5	PDS5 cohesin associated factor A [Source:MGI Symbol;Acc:MGI:1918771]	ENSMUSG00000029202	Pds5a	Yes	chr5:65605721-65698168:-		8934	ACAAAGGTAATGTAAAAGGAGAAAACGAAGGCCAAACAGAAGCAGAGTCCAGGTTCTGTA	GENCODE	-	Nucleus		ASMM10AP1B116688799V4	65698168	65605721	protein_coding	54.5771	186.168	5.93602	7.31629	70.1053	60.702	38.3845	50.743	52.9506	222.435	212.738	154.211	153.754	187.7	6.25037	5.9455	5.5583	5.95148	5.97446	7.8755	7.88312	6.82029	6.72823	7.27431
ENSMUST00000029639	0.0166428	0.0538651	2.60164	down	Yes	chr3	sorting nexin 7 [Source:MGI Symbol;Acc:MGI:1923811]	ENSMUSG00000028007	Snx7		chr3:117781647-117868936:-	NM_029655	2021	TAAGAAATGGGTGTCTATGATGTGTTCATTTCTATCAGAGGTAAATCTTCTGAAATGGTT	GENCODE	-			ASMM10AP1B115857296V4	117868936	117781647	protein_coding	246.744	775.805	7.92444	9.30386	208.663	151.557	83.7784	397.261	392.457	732.683	817.755	930.012	914.432	484.143	7.8977	7.25387	6.77391	8.89279	8.80395	9.5527	9.74283	9.31342	9.27028	8.64009
ENSMUST00000054960	0.00209045	0.0146551	2.6005	down	Yes	chr8	interferon regulatory factor 2 binding protein 2 [Source:MGI Symbol;Acc:MGI:2443921]	ENSMUSG00000051495	Irf2bp2		chr8:126588296-126593986:-	NM_001164598	5080	TTTTAAACCCACGCTATGGAGATATCACCTGCATTCTGTCATTTGTCAGATTTACAGTAC	GENCODE	-			ASMM10AP1B100092205V4	126593986	126588296	protein_coding	2457.51	8438.71	11.4458	12.8246	2676.4	3008.62	1196.69	2148.95	3256.91	10478.2	8227.38	7343.14	7355.94	8788.89	11.6773	11.8057	10.9214	11.1384	11.6861	13.4433	13.1812	12.2104	12.2302	13.0578
ENSMUST00000114934	0.00212667	0.0147749	2.59869	down	No	chr2	CUGBP, Elav-like family member 2 [Source:MGI Symbol;Acc:MGI:1338822]	ENSMUSG00000002107	Celf2		chr2:6541869-6884996:-		5470	GCGACTGTGGCATTGATGTTTGAGCGCACTTCTGAACTGGCTTTTGTTGAGACTATCAGT	GENCODE	-			ASMM10AP1B103492746V4	6884996	6541869	protein_coding	39.6323	132.345	5.44308	6.82086	48.2909	26.2604	30.8069	49.5362	43.2668	164.672	135.136	132.677	121.629	107.61	5.70366	4.69086	5.2213	5.9172	5.68237	7.43877	7.2442	6.60349	6.38943	6.42842
ENSMUST00000060537	0.00180342	0.0135947	2.598	down	Yes	chr4	kinesin family member 1B [Source:MGI Symbol;Acc:MGI:108426]	ENSMUSG00000063077	Kif1b	Yes	chr4:149176319-149307692:-	NM_001290995	10233	GGACTGGGAGATATTATTGATATTGACCCATTGATCGATGATTACTCTGGAAGTGGAGGC	GENCODE	-	Nucleus		ASMM10AP1B117859889V4	149307692	149176319	protein_coding	23.2606	75.5914	4.63524	6.01264	26.6539	24.7844	12.5168	22.8858	29.462	84.9394	79.6443	82.0984	70.7575	60.5177	4.81084	4.60371	3.82784	4.80724	5.12657	6.50831	6.48902	5.89695	5.6158	5.55311
ENSMUST00000059078	0.00453932	0.0235826	2.59336	down	Yes	chr16	family with sequence similarity 43, member A [Source:MGI Symbol;Acc:MGI:2676309]	ENSMUSG00000046546	Fam43a		chr16:30599723-30602797:+	NM_177632	3075	CAGTTCTGTTGGCATGTCAGCAGCGGGGTGAGAATAAAGAGGAAAAGCTGTCAGAACAGG	GENCODE	+			ASMM10AP1B100082861V4	30602797	30599723	protein_coding	148.635	487.137	7.29636	8.67118	132.097	144.48	62.6624	224.301	179.635	600.013	443.07	416.914	480.371	495.319	7.18948	7.186	6.33422	8.10132	7.67077	9.26857	8.88072	8.17649	8.35285	8.67728
ENSMUST00000119902	7.27636e-05	0.00253354	2.59008	down	No	chr3	tetraspanin 2 [Source:MGI Symbol;Acc:MGI:1917997]	ENSMUSG00000027858	Tspan2		chr3:102735215-102769205:+	NM_001243132	961	GGGTGGCGCCAGCTAGCCGGATCAGCCGTTATTGCATTTGGACTATGGTTTCGATTTGGA	GENCODE	+	Nucleus		ASMM10AP1B108594730V4	102769205	102735215	protein_coding	5.32711	16.1699	2.47656	3.84956	5	5	5	6.63554	5	14.0957	13.6304	16.9754	20.353	15.7951	2.33259	2.33065	2.33871	3.03626	2.34458	4.09328	4.14457	3.60375	3.84118	3.56499
ENSMUST00000080208	7.78318e-05	0.00259101	2.58911	down	Yes	chr17	erythrocyte membrane protein band 4.1 like 3 [Source:MGI Symbol;Acc:MGI:103008]	ENSMUSG00000024044	Epb41l3		chr17:69156810-69289989:+	NM_013813	4047	GGCCTTCCCGCCGCCCCCAGAACAATCAACCATGACGACCGAATCAGGATCAGACTCAGA	GENCODE	+	Nucleus		ASMM10AP1B102059186V4	69289989	69156810	protein_coding	138.379	527.749	7.30802	8.68047	128.132	181.585	136.717	117.813	127.65	323.076	373.147	779.35	789.807	373.365	7.1467	7.51277	7.53089	7.15261	7.19712	8.39259	8.64327	9.05822	9.04765	8.26064
ENSMUST00000047627	0.000161201	0.0037082	2.58901	down	Yes	chr13	GC-rich promoter binding protein 1 [Source:MGI Symbol;Acc:MGI:1920524]	ENSMUSG00000032745	Gpbp1	Yes	chr13:111425680-111490111:-	NM_028487	3694	AGTCCTTTTGGAATTTGGACTTGCCATGAGGTGTTGAAGCCTTGTTTCACTGAGTTGGAG	GENCODE	-	Nucleus	Yes	ASMM10AP1B100680497V4	111490111	111425680	protein_coding	33.5386	112.119	5.22326	6.59566	38.1903	30.271	25.7811	32.2772	41.1732	99.2549	115.121	110.517	102.236	133.466	5.34668	4.89911	4.94245	5.31243	5.61565	6.72842	7.01302	6.33404	6.14362	6.75921
ENSMUST00000081265	0.000116001	0.00319002	2.58744	down	No	chr11	early B cell factor 1 [Source:MGI Symbol;Acc:MGI:95275]	ENSMUSG00000057098	Ebf1		chr11:44617317-45008091:+	NM_001290711	5981	TTACATTTTTAAAAATTTTGCTTTTCAGCCCGCCTTGATGTAGCGCGAGTCTCATCGACT	GENCODE	+		Yes	ASMM10AP1B100032479V4	45008091	44617317	protein_coding	36.7563	124.229	5.35282	6.72435	39.1729	30.0446	28.6666	46.5934	39.3041	117.534	103.237	154.224	143.653	102.498	5.38743	4.88856	5.10723	5.83385	5.54705	6.96085	6.8545	6.82072	6.63202	6.35364
ENSMUST00000034738	0.000702177	0.00779575	2.58685	down	Yes	chr9	ribosomal L24 domain containing 1 [Source:MGI Symbol;Acc:MGI:2681840]	ENSMUSG00000032215	Rsl24d1		chr9:73113448-73123333:+	NM_198609	1543	GAATTTATGGATAGAATGCTAACTGTTATTTGTACATAAATAAAGCCCTTTCTAAAGTGC	GENCODE	+			ASMM10AP1B100165416V4	73123333	73113448	protein_coding	2812.65	8914.14	11.524	12.8952	2288.36	2032.21	1154.23	4303.29	4285.14	9159.85	7783.89	10110.1	10360.4	7156.42	11.4495	11.2033	10.8662	12.0537	12.0473	13.2263	13.0702	12.6908	12.7554	12.7333
[truncated: 903 more rows]
