# Supplementary material for: Identification of candidate long non-coding RNAs and mRNAs associated with heart aging in mice
Source: PeerJ. 2025 Dec 2;13:e20433. doi: 10.7717/peerj.20433 (PMC12679924; doi:10.7717/peerj.20433)
Supplement: Supplemental Information 6 [file peerj-13-20433-s006.xlsx]

## Sheet: cardiac structure
HW/BW	3m	20m
	5.08791	5.51198
	4.86182	5.89112
	4.97786	4.75148
	4.76259	5.26899
	4.68333	6.10992
HW/TL	3m	20m
	9.71329	11.0904
	9.34965	12.3855
	8.93378	10.4967
	9.06849	10.954
	9.75694	13.8121

## Sheet: ultrasound data
BPM	3m	20m
	442	473
	507	485
	474	480
	389	524
	398	499
FS	3m	20m
	19.8473	27.0492
	26.9565	29.9213
	40.678	32.1739
	39.6552	47.2222
	36.6071	30.5556
EF	3m	20m
	40.7929	53.0462
	53.1104	57.2844
	71.8927	60.9208
	70.7308	79.328
	67.041	58.8126
Tei index	3m	20m
	0.359322	0.532258
	0.339286	0.448276
	0.288136	0.45283
	0.305085	0.485294
	0.360656	0.507246
IVSd	3m	20m
	0.735	0.945
	0.77	1.085
	0.77	0.945
	0.805	1.085
	0.7	0.98
IVSs	3m	20m
	0.91	1.19
	1.12	1.68
	1.4	1.12
	1.12	1.33
	0.805	1.225
Lv mass	3m	20m
	132.265	151.78
	102.735	193.377
	110.745	145.409
	111.008	138.649
	101.461	135.073
LV mass correction	3m	20m
	105.812	121.424
	82.1878	154.702
	88.5961	116.327
	88.8061	110.919
	81.1691	108.058
LV volumn d	3m	20m
	96.5939	81.7064
	71.0432	89.8131
	75.5153	71.0432
	72.5176	61.1765
	66.7174	61.1765
LV volumn s	3m	20m
	57.1905	38.3642
	33.3119	38.3642
	21.2253	27.7631
	21.2253	12.6464
	21.9894	25.1971
LVIDd	3m	20m
	4.585	4.27
	4.025	4.445
	4.13	4.025
	4.06	3.78
	3.92	3.78
LVIDs	3m	20m
	3.675	3.115
	2.94	3.115
	2.45	2.73
	2.45	1.995
	2.485	2.625
LVPWd	3m	20m
	0.735	0.84
	0.665	0.945
	0.7	0.91
	0.7	0.84
	0.77	0.91
LVPWs	3m	20m
	0.875	1.12
	0.875	1.33
	1.295	1.19
	1.155	1.295
	1.12	0.945

## Sheet: histological measurements
masson	3m	20m
	5.2	15
	5.5	14.8
	4.8	14.7
	6	15.5
	5.4	16.1
	4.9	15.8
TUNEL	3m	20m
	4.2	24.5
	5	20.2
	4.8	15.1
	5.2	23
	5	20
	4.8	18
β-gal	3m	20m
	1	6.7
	0.9	8.6
	1.1	7.9
	0.9	7.8
	1.2	8.8
	1.1	7.9
